# Supplementary material for: Systemic Antibiotics as an Adjunct to Subgingival Debridement: A Network Meta-Analysis
Source: MDPI journal article supplement (doi:10.3390/antibiotics11121716), 2022-11-28
Supplement: s1 [file s1]

## Supplementary Materials

### Systemic Antibiotics as Adjunct to Subgingival Debridement: A Network Meta-Analysis

Ainol Haniza Kherul Anuwar, Mohd Syukri Mohd Taib, Rokiah Mamikutty, Roslan Saub, Syarida Hasnur Safii, Norintan Ab-Murat, and Chiu Wan Ng

**Table S1.** Search strategies for each electronic database

| No. | Date                                   | Database | Search strategy                                                                                                                                                                                                                                                                                                                                                                                                                                                                                                                                                                                                                                                                                                                                                                                                                                                                                                                                                                                                                                                                                                                                                                                                                                                                                                                                                                                                                                                                                                                                                                                                                                                                                                                                                                                                                                                                                                                                                                                                                                                                                                                                                                                                                                                                                                                                                                                                                                                                                                                                                                                                                                                                                                                                                                                                                                                                                                                                                                                                                                                                                                                                                                                                                                                                                                                                                                                                                                                                                                                                                                                 |
|-----|----------------------------------------|----------|-------------------------------------------------------------------------------------------------------------------------------------------------------------------------------------------------------------------------------------------------------------------------------------------------------------------------------------------------------------------------------------------------------------------------------------------------------------------------------------------------------------------------------------------------------------------------------------------------------------------------------------------------------------------------------------------------------------------------------------------------------------------------------------------------------------------------------------------------------------------------------------------------------------------------------------------------------------------------------------------------------------------------------------------------------------------------------------------------------------------------------------------------------------------------------------------------------------------------------------------------------------------------------------------------------------------------------------------------------------------------------------------------------------------------------------------------------------------------------------------------------------------------------------------------------------------------------------------------------------------------------------------------------------------------------------------------------------------------------------------------------------------------------------------------------------------------------------------------------------------------------------------------------------------------------------------------------------------------------------------------------------------------------------------------------------------------------------------------------------------------------------------------------------------------------------------------------------------------------------------------------------------------------------------------------------------------------------------------------------------------------------------------------------------------------------------------------------------------------------------------------------------------------------------------------------------------------------------------------------------------------------------------------------------------------------------------------------------------------------------------------------------------------------------------------------------------------------------------------------------------------------------------------------------------------------------------------------------------------------------------------------------------------------------------------------------------------------------------------------------------------------------------------------------------------------------------------------------------------------------------------------------------------------------------------------------------------------------------------------------------------------------------------------------------------------------------------------------------------------------------------------------------------------------------------------------------------------------------|
| 1.  | 14.09.2020<br>Updated on<br>11.09.2021 | PubMed   | <ol style="list-style-type: none"> <li>1. periodontitis [MeSH Terms] OR chronic periodontitis [MeSH Terms] OR aggressive periodontitis [MeSH Terms] OR pericementitides [Title/Abstract] OR pericementitis [Title/Abstract]</li> <li>2. periodontitides [Title/Abstract] OR periodontitis [Title/Abstract] OR adult periodontitides [Title/Abstract] OR adult periodontitis [Title/Abstract] OR chronic periodontitides [Title/Abstract] OR chronic periodontitis [Title/Abstract] OR aggressive periodontitis [Title/Abstract] OR circumpubertal periodontitis [Title/Abstract] OR early onset periodontitis [Title/Abstract] OR early-onset periodontitides [Title/Abstract] OR early-onset periodontitis [Title/Abstract] OR juvenile periodontitides [Title/Abstract] OR juvenile periodontitis [Title/Abstract] OR prepubertal periodontitis [Title/Abstract] OR periodontoses [Title/Abstract] OR periodontosis [Title/Abstract]</li> <li>3. anti-bacterial agents [MeSH Terms] OR penicillins [MeSH Terms] OR cephalosporins [MeSH Terms] OR amoxicillin [MeSH Terms] OR amoxicillin-potassium clavulanate combination [MeSH Terms] OR azithromycin [MeSH Terms] OR clarithromycin [MeSH Terms] OR metronidazole [MeSH Terms] OR moxifloxacin [MeSH Terms] OR spiramycin [MeSH Terms] OR tetracycline [MeSH Terms]</li> <li>4. anti bacterial agents [Title/Abstract] OR anti-bacterial agents [Title/Abstract] OR anti mycobacterial agents [Title/Abstract] OR anti-mycobacterial agents [Title/Abstract] OR antimycobacterial agents [Title/Abstract] OR antibacterial agents [Title/Abstract] OR bacteriocidal agents [Title/Abstract] OR anti-bacterial compounds [Title/Abstract] OR anti bacterial compounds [Title/Abstract] OR antibiotic [Title/Abstract] OR antibiotics [Title/Abstract] OR bacteriocides [Title/Abstract] OR penicillin antibiotics [Title/Abstract] OR penicillin [Title/Abstract] OR penicillins [Title/Abstract] OR cephalosporin antibiotics [Title/Abstract] OR cephalosporanic acids [Title/Abstract] OR amoxycillin [Title/Abstract] OR amoxicilline [Title/Abstract] OR amoxicillin monopotassium salt [Title/Abstract] OR amoxicillin sodium [Title/Abstract] OR amoxicillin monosodium salt [Title/Abstract] OR amoxicillin anhydrous [Title/Abstract] OR amoxicillin trihydrate [Title/Abstract] OR hydroxyampicillin [Title/Abstract] OR actimoxiclamoxyl [Title/Abstract] OR penamox [Title/Abstract] OR polymox [Title/Abstract] OR trimox [Title/Abstract] OR wymox [Title/Abstract] OR wymox [Title/Abstract] OR amoxicillin potassium clavulanate combination [Title/Abstract] OR co-amoxiclav [Title/Abstract] OR co amoxiclav [Title/Abstract] OR coamoxiclav [Title/Abstract] OR amoxicillin-clavulanic acid [Title/Abstract] OR amoxicillin clavulanic acid [Title/Abstract] OR amoxi-clavulanate [Title/Abstract] OR amoxi clavulanate [Title/Abstract] OR potassium clavulanate-amoxicillin combination [Title/Abstract] OR potassium clavulanate amoxicillin combination [Title/Abstract] OR amoxycillin-clavulanic acid [Title/Abstract] OR amoxycillin clavulanic acid [Title/Abstract] OR amox-clav [Title/Abstract] OR amox clav [Title/Abstract] OR clavulanate potentiated amoxycillin [Title/Abstract] OR augmentin [Title/Abstract] OR synulox [Title/Abstract] OR spektramox [Title/Abstract] OR clavulin [Title/Abstract] OR Azithromycin [Title/Abstract] OR sumamed [Title/Abstract] OR toraseptol [Title/Abstract] OR vinzam [Title/Abstract] OR Zithromax [Title/Abstract] OR Azitrocin [Title/Abstract] OR</li> </ol> |

| No. | Date       | Database                             | Search strategy                                                                                                                                                                                                                                                                                                                                                                                                                                                                                                                                                                                                                                                                                                                                                                                                                                                                                                                                                                                                                                                                                                                                                                                                                                                                                                                                                                                                                                                                                                                                                                                                                                                                                                                                                                                                                                                                                                                                                                                                                                                                                                                                                                                                                                                             |
|-----|------------|--------------------------------------|-----------------------------------------------------------------------------------------------------------------------------------------------------------------------------------------------------------------------------------------------------------------------------------------------------------------------------------------------------------------------------------------------------------------------------------------------------------------------------------------------------------------------------------------------------------------------------------------------------------------------------------------------------------------------------------------------------------------------------------------------------------------------------------------------------------------------------------------------------------------------------------------------------------------------------------------------------------------------------------------------------------------------------------------------------------------------------------------------------------------------------------------------------------------------------------------------------------------------------------------------------------------------------------------------------------------------------------------------------------------------------------------------------------------------------------------------------------------------------------------------------------------------------------------------------------------------------------------------------------------------------------------------------------------------------------------------------------------------------------------------------------------------------------------------------------------------------------------------------------------------------------------------------------------------------------------------------------------------------------------------------------------------------------------------------------------------------------------------------------------------------------------------------------------------------------------------------------------------------------------------------------------------------|
|     |            |                                      | <p>Azadose [Title/Abstract] OR Ultroneo [Title/Abstract] OR Zitromax [Title/Abstract] OR azithromycin dihydrate [Title/Abstract] OR azithromycin monohydrate [Title/Abstract] OR goxal [Title/Abstract] OR zentavion [Title/Abstract] OR clarithromycin [Title/Abstract] OR biaxin [Title/Abstract] OR doxycycline monohydrate [Title/Abstract] OR doxycycline hyclate [Title/Abstract] OR doxycycline hemiethanolate [Title/Abstract] OR doxycycline calcium [Title/Abstract] OR doxycycline chinoin [Title/Abstract] OR vibramycin [Title/Abstract] OR atridox [Title/Abstract] OR doryx [Title/Abstract] OR doxycycline-chinoin [Title/Abstract] OR hydramycin [Title/Abstract] OR oracea [Title/Abstract] OR periostat [Title/Abstract] OR vibra-tabs [Title/Abstract] OR vibra tabs [Title/Abstract] OR vibramycin novum [Title/Abstract] OR vibravenos [Title/Abstract] OR trichazol [Title/Abstract] OR trichopo [Title/Abstract] OR trivazol [Title/Abstract] OR metronidazole phosphoester [Title/Abstract] OR vagilen [Title/Abstract] OR metronidazole phosphate [Title/Abstract] OR danazol [Title/Abstract] OR flagyl [Title/Abstract] OR gineflavir [Title/Abstract] OR metric [Title/Abstract] OR metrodzhil [Title/Abstract] OR metrogel [Title/Abstract] OR metrogyl [Title/Abstract] OR metronidazole hydrochloride [Title/Abstract] OR metronidazole monohydrochloride [Title/Abstract] OR clont [Title/Abstract] OR octegra [Title/Abstract] OR proflox [Title/Abstract] OR moxifloxacin hydrochloride [Title/Abstract] OR avelox [Title/Abstract] OR avalox [Title/Abstract] OR izilox [Title/Abstract] OR actira [Title/Abstract] OR spiramycine [Title/Abstract] OR rovamycine [Title/Abstract] OR selectomycin [Title/Abstract] OR rovamycin [Title/Abstract] OR spiramycin adipate [Title/Abstract] OR Tetrabid [Title/Abstract] OR Topicycline [Title/Abstract] OR achromycin v [Title/Abstract] OR hostacyclin [Title/Abstract] OR tetracycline hydrochloride [Title/Abstract] OR tetracycline monohydrochloride [Title/Abstract] OR sustamycin [Title/Abstract] OR achromycin [Title/Abstract]</p> <p>5. 1 or 2<br/> 6. 3 or 4<br/> 7. 5 and 6; Filters: Meta-Analysis, Randomized Controlled Trial, Systematic Review, from 2000 - current</p> |
| 2.  | 13.09.2021 | MEDLINE<br>Complete via<br>EBSCOhost | <p>1. MH periodontitis [mesh] OR MH chronic periodontitis OR MW aggressive periodontitis<br/> 2. AB pericementitides OR AB pericementitis OR AB periodontitides OR AB periodontitis OR AB adult periodontitis OR AB adult periodontitides OR AB chronic periodontitides OR AB chronic periodontitis OR AB aggressive periodontitis OR AB circumpubertal periodontitis OR AB early onset periodontitis OR AB early-onset periodontitides<br/> 3. AB early-onset periodontitis OR AB juvenile periodontitides OR AB juvenile periodontitis OR AB prepubertal periodontitis OR AB periodontoses OR AB periodontosis<br/> 4. S1 OR S2 OR S3<br/> 5. MH anti-bacterial agents OR MH penicillins OR MH cephalosporins OR MH amoxicillin OR MH amoxicillin-potassium clavulanate combination OR MH azithromycin OR MH clarithromycin OR MH doxycycline OR MH metronidazole OR MH moxifloxacin OR MH spiroamycin OR MH tetracycline<br/> 6. AB anti-bacterial agents OR AB anti bacterial agents OR AB anti mycobacterial agents OR AB anti-mycobacterial agents OR AB antimycobacterial agents OR AB antibacterial agents OR AB bacteriocidal agents OR AB anti-bacterial compounds OR AB anti bacterial compounds OR AB antibiotics OR AB antibiotic OR AB bacteriocides<br/> 7. AB penicillin antibiotics OR AB penicillin OR AB penicillins OR AB cephalosporin antibiotics OR AB cephalosporanic acids OR AB amoxycillin OR AB amoxicilline OR AB amoxicillin monopotassium salt OR AB amoxicillin sodium OR AB amoxicillin monosodium salt OR AB amoxicillin anhydrous OR AB amoxicillin trihydrate<br/> 8. AB hydroxyampicillin OR AB actimoxyclamoxyl OR AB penamox OR AB polymox OR AB trimox OR AB wymox OR AB amoxil OR AB amoxicillin potassium clavulanate combination OR AB co-amoxiclav OR AB co amoxiclav OR AB coamoxiclav OR AB amoxicillin-clavulanic acid</p>                                                                                                                                                                                                                                                                                                                                                                                                   |

| No. | Date       | Database                      | Search strategy                                                                                                                                                                                                                                                                                                                                                                                                                                                                                                                                                                                                                                                                                                                                                                                                                                                                                                                                                                                                                                                                                                                                                                                                                                                                                                                                                                                                                                                                                                                                                                                                                                                                                                                                                                                                                                                                                                                                                                                                                                                                                                                               |
|-----|------------|-------------------------------|-----------------------------------------------------------------------------------------------------------------------------------------------------------------------------------------------------------------------------------------------------------------------------------------------------------------------------------------------------------------------------------------------------------------------------------------------------------------------------------------------------------------------------------------------------------------------------------------------------------------------------------------------------------------------------------------------------------------------------------------------------------------------------------------------------------------------------------------------------------------------------------------------------------------------------------------------------------------------------------------------------------------------------------------------------------------------------------------------------------------------------------------------------------------------------------------------------------------------------------------------------------------------------------------------------------------------------------------------------------------------------------------------------------------------------------------------------------------------------------------------------------------------------------------------------------------------------------------------------------------------------------------------------------------------------------------------------------------------------------------------------------------------------------------------------------------------------------------------------------------------------------------------------------------------------------------------------------------------------------------------------------------------------------------------------------------------------------------------------------------------------------------------|
|     |            |                               | <p>9. AB amoxicillin clavulanic acid OR AB amoxi-clavulanate OR AB amoxi clavulanate OR AB potassium clavulanate-amoxicillin combination OR AB potassium clavulanate amoxicillin combination OR AB amoxycillin-clavulanic acid OR AB amoxycillin clavulanic acid OR AB amox-clav OR AB amox clav OR AB clavulanate potentiated amoxycillin OR AB augmentin OR AB synulox</p> <p>10. AB spektramox OR AB clavulin OR AB Azithromycin OR AB sumamed OR AB toraseptol OR AB vinzam OR AB Zithromax OR AB Azitrocin OR AB Azadose OR AB Ultreon OR AB Zitromax OR AB azithromycin dihydrate</p> <p>11. AB azithromycin monohydrate OR AB goxal OR AB zentavion OR AB clarithromycin OR AB biaxin OR AB doxycycline monohydrate OR AB doxycycline hyclate OR AB doxycycline hemiethanolate OR AB doxycycline calcium OR AB doxycycline chinoin OR AB vibramycin OR AB atridox</p> <p>12. AB doryx OR AB doxycycline-chinoin OR AB hydramycin OR AB oracea OR AB periostat OR AB vibra-tabs OR AB vibra tabs OR AB vibramycin novum OR AB vibravenos OR AB trichazol OR AB trichopol OR AB trivazol</p> <p>13. AB metronidazole phosphoester OR AB vagilen OR AB metronidazole phosphate OR AB danazol OR AB flagyl OR AB gineflavir OR AB metric OR AB metrodzhil OR AB metrogel OR AB metrogyl OR AB metronidazole hydrochloride OR AB metronidazole monohydrochloride</p> <p>14. AB clont OR AB octegra OR AB proflox OR AB moxifloxacin hydrochloride OR AB avelox OR AB avalox OR AB izilox OR AB actira OR AB spiramycine OR AB rovamycine OR AB selectomycin OR AB rovamycin</p> <p>15. AB spiramycin adipate OR AB Tetrabid OR AB Topicycline OR AB achromycin v OR AB hostacyclin OR AB tetracycline hydrochloride OR AB tetracycline monohydrochloride OR AB sustamycin OR AB achromycin</p> <p>16. S5 OR S6 OR S7 OR S8 OR S9 OR S10 OR S11 OR S12 OR S13 OR S14 OR S15</p> <p>17. S4 AND S16</p> <p>18. S4 AND S16; Date of Publication: 20000101-20211231; English Language; Human 1,384</p> <p>19. S4 AND S16; Limiters - Date of Publication: 20000101-20211231; English Language; Publication Type: Randomized Controlled Trial</p> |
| 3.  | 13.09.2021 | CINAHL Complete via EBSCOhost | <p>1. MH periodontitis [mesh] OR MH chronic periodontitis OR MW aggressive periodontitis</p> <p>2. AB pericementitis OR AB pericementitis OR AB periodontitides OR AB periodontitis OR AB adult periodontitis OR AB adult periodontitides OR AB chronic periodontitides OR AB chronic periodontitis OR AB aggressive periodontitis OR AB circumpubertal periodontitis OR AB early onset periodontitis OR AB early-onset periodontitides</p> <p>3. AB early-onset periodontitis OR AB juvenile periodontitides OR AB juvenile periodontitis OR AB prepubertal periodontitis OR AB periodontoses OR AB periodontosis</p> <p>4. S1 OR S2 OR S3</p> <p>5. MH anti-bacterial agents OR MH penicillins OR MH cephalosporins OR MH amoxicillin OR MH amoxicillin-potassium clavulanate combination OR MH azithromycin OR MH clarithromycin OR MH doxycycline OR MH metronidazole OR MH moxifloxacin OR MH spiromycin OR MH tetracycline</p> <p>6. AB anti-bacterial agents OR AB anti bacterial agents OR AB anti mycobacterial agents OR AB anti-mycobacterial agents OR AB antimycobacterial agents OR AB antibacterial agents OR AB bacteriocidal agents OR AB anti-bacterial compounds OR AB anti bacterial compounds OR AB antibiotics OR AB antibiotic OR AB bacteriocides</p> <p>7. AB penicillin antibiotics OR AB penicillin OR AB penicillins OR AB cephalosporin antibiotics OR AB cephalosporanic acids OR AB amoxycillin OR AB amoxicilline OR AB amoxicillin monopotassium salt OR AB amoxicillin sodium OR AB amoxicillin monosodium salt OR AB amoxicillin anhydrous OR AB amoxicillin trihydrate</p> <p>8. AB hydroxyampicillin OR AB actimoxiclamoxyl OR AB penamox OR AB polymox OR AB trimox OR AB wymox OR AB amoxil OR AB amoxicillin potassium clavulanate combination OR AB co-amoxiclav OR AB co amoxiclav OR AB coamoxiclav OR AB amoxicillin-clavulanic acid</p>                                                                                                                                                                                                                                                          |

| No. | Date       | Database                                | Search strategy                                                                                                                                                                                                                                                                                                                                                                                                                                                                                                                                                                                                                                                                                                                                                                                                                                                                                                                                                                                                                                                                                                                                                                                                                                                                                                                                                                                                                                                                                                                                                                                                                                                                                                                                                                                                                                                                                                                                                                                         |
|-----|------------|-----------------------------------------|---------------------------------------------------------------------------------------------------------------------------------------------------------------------------------------------------------------------------------------------------------------------------------------------------------------------------------------------------------------------------------------------------------------------------------------------------------------------------------------------------------------------------------------------------------------------------------------------------------------------------------------------------------------------------------------------------------------------------------------------------------------------------------------------------------------------------------------------------------------------------------------------------------------------------------------------------------------------------------------------------------------------------------------------------------------------------------------------------------------------------------------------------------------------------------------------------------------------------------------------------------------------------------------------------------------------------------------------------------------------------------------------------------------------------------------------------------------------------------------------------------------------------------------------------------------------------------------------------------------------------------------------------------------------------------------------------------------------------------------------------------------------------------------------------------------------------------------------------------------------------------------------------------------------------------------------------------------------------------------------------------|
|     |            |                                         | <p>9. AB amoxicillin clavulanic acid OR AB amoxi-clavulanate OR AB amoxi clavulanate OR AB potassium clavulanate-amoxicillin combination OR AB potassium clavulanate amoxicillin combination OR AB amoxycillin-clavulanic acid OR AB amoxycillin clavulanic acid OR AB amox-clav OR AB amox clav OR AB clavulanate potentiated amoxycillin OR AB augmentin OR AB synulox</p> <p>10. AB spektramox OR AB clavulin OR AB Azithromycin OR AB sumamed OR AB toraseptol OR AB vinzam OR AB Zithromax OR AB Azitrocin OR AB Azadose OR AB Ultreon OR AB Zitromax OR AB azithromycin dihydrate</p> <p>11. AB azithromycin monohydrate OR AB goxal OR AB zentavion OR AB clarithromycin OR AB biaxin OR AB doxycycline monohydrate OR AB doxycycline hyclate OR AB doxycycline hemiethanolate OR AB doxycycline calcium OR AB doxycycline chinoin OR AB vibramycin OR AB atridox</p> <p>12. AB doryx OR AB doxycycline-chinoin OR AB hydramycin OR AB oracea OR AB periostat OR AB vibra-tabs OR AB vibra tabs OR AB vibramycin novum OR AB vibravenos OR AB trichazol OR AB trichopol OR AB trivazol</p> <p>13. AB metronidazole phosphoester OR AB vagilen OR AB metronidazole phosphate OR AB danazol OR AB flagyl OR AB gineflavir OR AB metric OR AB metrodzhil OR AB metrogel OR AB metrogyl OR AB metronidazole hydrochloride OR AB metronidazole monohydrochloride</p> <p>14. AB clont OR AB octegra OR AB proflox OR AB moxifloxacin hydrochloride OR AB avelox OR AB avalox OR AB izilox OR AB actira OR AB spiramycine OR AB rovamycine OR AB selectomycin OR AB rovamycin</p> <p>15. AB spiramycin adipate OR AB Tetrabid OR AB Topicycline OR AB achromycin v OR AB hostacyclin OR AB tetracycline hydrochloride OR AB tetracycline monohydrochloride OR AB sustamycin OR AB achromycin</p> <p>16. S5 OR S6 OR S7 OR S8 OR S9 OR S10 OR S11 OR S12 OR S13 OR S14 OR S15</p> <p>17. S4 AND S16</p> <p>18. S4 AND S16; Limiters: Date of Publication: 20000101-20211231; English Language; Human</p> |
| 4.  | 13.09.2021 | Dentistry & Oral Sciences via EBSCOhost | <p>1. MH periodontitis [mesh] OR MH chronic periodontitis OR MW aggressive periodontitis</p> <p>2. AB pericementitis OR AB pericementitis OR AB periodontitis OR AB adult periodontitis OR AB adult periodontitis OR AB chronic periodontitis OR AB chronic periodontitis OR AB aggressive periodontitis OR AB circumpubertal periodontitis OR AB early onset periodontitis OR AB early-onset periodontitis</p> <p>3. AB early-onset periodontitis OR AB juvenile periodontitis OR AB juvenile periodontitis OR AB prepubertal periodontitis OR AB periodontoses OR AB periodontosis</p> <p>4. S1 OR S2 OR S3</p> <p>5. MH anti-bacterial agents OR MH penicillins OR MH cephalosporins OR MH amoxicillin OR MH amoxicillin-potassium clavulanate combination OR MH azithromycin OR MH clarithromycin OR MH doxycycline OR MH metronidazole OR MH moxifloxacin OR MH spiromycin OR MH tetracycline</p> <p>6. AB anti-bacterial agents OR AB anti bacterial agents OR AB anti mycobacterial agents OR AB anti-mycobacterial agents OR AB antimycobacterial agents OR AB antibacterial agents OR AB bacteriocidal agents OR AB anti-bacterial compounds OR AB anti bacterial compounds OR AB antibiotics OR AB antibiotic OR AB bacteriocides</p> <p>7. AB penicillin antibiotics OR AB penicillin OR AB penicillins OR AB cephalosporin antibiotics OR AB cephalosporanic acids OR AB amoxycillin OR AB amoxicilline OR AB amoxicillin monopotassium salt OR AB amoxicillin sodium OR AB amoxicillin monosodium salt OR AB amoxicillin anhydrous OR AB amoxicillin trihydrate</p> <p>8. AB hydroxyampicillin OR AB actimoxiclamoxy OR AB penamox OR AB polymox OR AB trimox OR AB wymox OR AB amoxil OR AB amoxicillin potassium clavulanate combination OR AB co-amoxiclav OR AB co amoxiclav OR AB coamoxiclav OR AB amoxicillin-clavulanic acid</p>                                                                                                                                                   |

| No. | Date       | Database | Search strategy                                                                                                                                                                                                                                                                                                                                                                                                                                                                                                                                                                                                                                                                                                                                                                                                                                                                                                                                                                                                                                                                                                                                                                                                                                                                                                                                                                                                                                                                                                                                                                                                                                                                                                                                                                                                                                                                                                                                                                                                                                                                                                                                                                                                                                                                                                                                                                                                                                                                                                                                                            |
|-----|------------|----------|----------------------------------------------------------------------------------------------------------------------------------------------------------------------------------------------------------------------------------------------------------------------------------------------------------------------------------------------------------------------------------------------------------------------------------------------------------------------------------------------------------------------------------------------------------------------------------------------------------------------------------------------------------------------------------------------------------------------------------------------------------------------------------------------------------------------------------------------------------------------------------------------------------------------------------------------------------------------------------------------------------------------------------------------------------------------------------------------------------------------------------------------------------------------------------------------------------------------------------------------------------------------------------------------------------------------------------------------------------------------------------------------------------------------------------------------------------------------------------------------------------------------------------------------------------------------------------------------------------------------------------------------------------------------------------------------------------------------------------------------------------------------------------------------------------------------------------------------------------------------------------------------------------------------------------------------------------------------------------------------------------------------------------------------------------------------------------------------------------------------------------------------------------------------------------------------------------------------------------------------------------------------------------------------------------------------------------------------------------------------------------------------------------------------------------------------------------------------------------------------------------------------------------------------------------------------------|
|     |            |          | <p>9. AB amoxicillin clavulanic acid OR AB amoxi-clavulanate OR AB amoxi clavulanate OR AB potassium clavulanate-amoxicillin combination OR AB potassium clavulanate amoxicillin combination OR AB amoxycillin-clavulanic acid OR AB amoxycillin clavulanic acid OR AB amox-clav OR AB amox clav OR AB clavulanate potentiated amoxycillin OR AB augmentin OR AB synulox</p> <p>10. AB spektramox OR AB clavulin OR AB Azithromycin OR AB sumamed OR AB toraseptol OR AB vinzam OR AB Zithromax OR AB Azitrocin OR AB Azadose OR AB Ultreon OR AB Zitromax OR AB azithromycin dihydrate</p> <p>11. AB azithromycin monohydrate OR AB goxal OR AB zentavion OR AB clarithromycin OR AB biaxin OR AB doxycycline monohydrate OR AB doxycycline hyclate OR AB doxycycline hemiethanolate OR AB doxycycline calcium OR AB doxycycline chinoin OR AB vibramycin OR AB atridox</p> <p>12. AB doryx OR AB doxycycline-chinoin OR AB hydramycin OR AB oracea OR AB periostat OR AB vibra-tabs OR AB vibra tabs OR AB vibramycin novum OR AB vibravenos OR AB trichazol OR AB trichopol OR AB trivazol</p> <p>13. AB metronidazole phosphoester OR AB vagilen OR AB metronidazole phosphate OR AB danazol OR AB flagyl OR AB gineflavir OR AB metric OR AB metrodzhil OR AB metrogel OR AB metrogyl OR AB metronidazole hydrochloride OR AB metronidazole monohydrochloride</p> <p>14. AB clont OR AB octegra OR AB proflox OR AB moxifloxacin hydrochloride OR AB avelox OR AB avalox OR AB izilox OR AB actira OR AB spiramycine OR AB rovamycine OR AB selectomycin OR AB rovamycin</p> <p>15. AB spiramycin adipate OR AB Tetrabid OR AB Topicycline OR AB achromycin v OR AB hostacyclin OR AB tetracycline hydrochloride OR AB tetracycline monohydrochloride OR AB sustamycin OR AB achromycin</p> <p>16. S5 OR S6 OR S7 OR S8 OR S9 OR S10 OR S11 OR S12 OR S13 OR S14 OR S15</p> <p>17. S4 AND S16</p> <p>18. S4 AND S16; Limiters - Publication Date: 20000101-20211231</p>                                                                                                                                                                                                                                                                                                                                                                                                                                                                                                                                                                                               |
| 5.  | 13.09.2021 | WOS      | <p>1. TS=pericementitides OR TS=pericementitis OR TS=periodontitides OR TS=periodontitis OR TS=adult periodontitides OR TS=adult periodontitis OR TS=chronic periodontitides OR TS=chronic periodontitis OR TS=aggressive periodontitis OR TS=circumpubertal periodontitis OR TS=early onset periodontitis OR TS=early-onset periodontitides OR TS=early-onset periodontitis OR TS=juvenile periodontitides OR TS=juvenile periodontitis OR TS=prepubertal periodontitis OR TS=periodontoses OR TS=periodontosis</p> <p>2. TS=anti-bacterial agents OR TS=anti bacterial agents OR TS=anti mycobacterial agents OR TS=anti-mycobacterial agents OR TS=antimycobacterial agents OR TS=antibacterial agents OR TS=bacteriocidal agents OR TS=anti-bacterial compounds OR TS=anti bacterial compounds OR TS=antibiotic OR TS=antibiotics OR TS=bacteriocides OR TS=penicillin antibiotics OR TS=penicillin OR TS=penicillins OR TS=cephalosporin antibiotics OR TS=cephalosporanic acids OR TS=amoxycillin OR TS=amoxicilline OR TS=amoxicillin monopotassium salt OR TS=amoxicillin sodium OR TS=amoxicillin monosodium salt OR TS=amoxicillin anhydrous OR TS=amoxicillin trihydrate OR TS=hydroxyampicillin OR TS=actimoxiclamoxyl OR TS=penamox OR TS=polymox OR TS=trimox OR TS=wymox OR TS=amoxil OR TS=amoxicillin potassium clavulanate combination OR TS=co-amoxiclav OR TS=co amoxiclav OR TS=coamoxiclav OR TS=amoxicillin-clavulanic acid OR TS=amoxicillin clavulanic acid OR TS=amoxi-clavulanate OR TS=amoxi clavulanate OR TS=potassium clavulanate-amoxicillin combination OR TS=potassium clavulanate amoxicillin combination OR TS=amoxycillin-clavulanic acid OR TS=amoxycillin clavulanic acid OR TS=amox-clav OR TS=amox clav OR TS=clavulanate potentiated amoxycillin OR TS=augmentin OR TS=synulox OR TS=spektramox OR TS=clavulin OR TS=Azithromycin OR TS=sumamed OR TS=toraseptol OR TS=vinzam OR TS=Zithromax OR TS=Azitrocin OR TS=Azadose OR TS=Ultreon OR TS=zitromax OR TS=azithromycin dihydrate OR TS=azithromycin monohydrate OR TS=goal OR TS=zentavion OR TS=clarithromycin OR TS=biaxin OR TS=doxycycline monohydrate OR TS=doxycycline hyclate OR TS=doxycycline hemiethanolate OR TS=doxycycline calcium OR TS=doxycycline chinoin OR TS=vibramycin OR TS=atridox OR TS=doryx OR TS=doxycycline-chinoin OR TS=hydramycin OR TS=oracea OR TS=periostat OR TS=vibra-tabs OR TS=vibra tabs OR TS=vibramycin novum OR TS=vibravenos OR TS=trichazol OR TS=trichopol OR TS=trivazol OR TS=metronidazole phosphoester OR TS=danazol OR</p> |

| No. | Date       | Database | Search strategy                                                                                                                                                                                                                                                                                                                                                                                                                                                                                                                                                                                                                                                                                                                                                                                                                                                                                                                                                                                                                                                                                                                                                                                                                                                                                                                                                                                                                                                                                                                                                                                                                                                                                                                                                                                                                                                                                                                                                                                                                                                                                                                                                                                                                                                                                                                                                                                                                                                                                                                                                                                                                                                                                                                                                                                                                                                                                                                                                                                                                                                                                                                                                                                                                                                                                                                                                                                                                                                                                                                                                                                  |
|-----|------------|----------|--------------------------------------------------------------------------------------------------------------------------------------------------------------------------------------------------------------------------------------------------------------------------------------------------------------------------------------------------------------------------------------------------------------------------------------------------------------------------------------------------------------------------------------------------------------------------------------------------------------------------------------------------------------------------------------------------------------------------------------------------------------------------------------------------------------------------------------------------------------------------------------------------------------------------------------------------------------------------------------------------------------------------------------------------------------------------------------------------------------------------------------------------------------------------------------------------------------------------------------------------------------------------------------------------------------------------------------------------------------------------------------------------------------------------------------------------------------------------------------------------------------------------------------------------------------------------------------------------------------------------------------------------------------------------------------------------------------------------------------------------------------------------------------------------------------------------------------------------------------------------------------------------------------------------------------------------------------------------------------------------------------------------------------------------------------------------------------------------------------------------------------------------------------------------------------------------------------------------------------------------------------------------------------------------------------------------------------------------------------------------------------------------------------------------------------------------------------------------------------------------------------------------------------------------------------------------------------------------------------------------------------------------------------------------------------------------------------------------------------------------------------------------------------------------------------------------------------------------------------------------------------------------------------------------------------------------------------------------------------------------------------------------------------------------------------------------------------------------------------------------------------------------------------------------------------------------------------------------------------------------------------------------------------------------------------------------------------------------------------------------------------------------------------------------------------------------------------------------------------------------------------------------------------------------------------------------------------------------|
|     |            |          | <p>TS=flagyl OR TS=gineflavir OR TS=metric OR TS=metrodzhil OR TS=metrogel OR TS=metrogyl OR TS=metronidazole hydrochloride OR TS=metronidazole monohydrochloride OR TS=clont OR TS=octegra OR TS=proflox OR TS=moxifloxacin hydrochloride OR TS=avelox OR TS=avalox OR TS=izilox OR TS=actira OR TS=spiramycine OR TS=rovamycine OR TS=selectomycin OR TS=rovamycin OR TS=spiramycin adipate OR TS=Tetrabid OR TS=Topicycline OR TS=achromycin v OR TS=hostacyclin OR TS=tetracycline hydrochloride OR TS=tetracycline monohydrochloride OR TS=sustamycin OR TS=achromycin</p> <p>3. #1 AND #2</p> <p>4. #1 AND #2 and 2000 or 2001 or 2002 or 2003 or 2004 or 2005 or 2006 or 2007 or 2008 or 2009 or 2010 or 2011 or 2012 or 2013 or 2014 or 2015 or 2016 or 2017 or 2018 or 2019 or 2020 or 2021 Publication Years and English Languages and Articles Document Types and Dentistry Oral Surgery Medicine Web of Science Categories</p>                                                                                                                                                                                                                                                                                                                                                                                                                                                                                                                                                                                                                                                                                                                                                                                                                                                                                                                                                                                                                                                                                                                                                                                                                                                                                                                                                                                                                                                                                                                                                                                                                                                                                                                                                                                                                                                                                                                                                                                                                                                                                                                                                                                                                                                                                                                                                                                                                                                                                                                                                                                                                                                       |
| 6.  | 13.09.2021 | Scopus   | <p>1. TITLE-ABS pericementitides OR pericementitis OR periodontitides OR periodontitis OR "adult periodontitides" OR "adult periodontitis" OR "chronic periodontitides" OR "chronic periodontitis" OR "aggressive periodontitis" OR "circumpubertal periodontitis" OR "early onset periodontitis" OR "early-onset periodontitides" OR "early-onset periodontitis" OR "juvenile periodontitides" OR "juvenile periodontitis" OR "prepubertal periodontitis" OR periodontoses OR periodontosis</p> <p>2. TITLE-ABS "anti bacterial agents" OR "anti-bacterial agents" OR "anti mycobacterial agents" OR "anti-mycobacterial agents" OR "antimycobacterial agents" OR "antibacterial agents" OR "bacteriocidal agents" OR "anti-bacterial compounds" OR "anti bacterial compounds" OR antibiotic OR antibiotics OR bacteriocides OR "penicillin antibiotics" OR penicillin OR penicillins OR "cephalosporin antibiotics" OR "cephalosporanic acids" OR amoxycillin OR amoxicilline OR "amoxicillin monopotassium salt" OR "amoxicillin sodium" OR "amoxicillin monosodium salt" OR "amoxicillin anhydrous" OR "amoxicillin trihydrate" OR hydroxyampicillin OR actimoxiclamoxy OR penamox OR polymox OR trimox OR wymox OR amoxil OR "amoxicillin potassium clavulanate combination" OR co-amoxiclav OR "co amoxiclav" OR coamoxiclav OR "amoxicillin-clavulanic acid" OR "amoxicillin clavulanic acid" OR amoxi-clavulanate OR "amoxi clavulanate" OR "potassium clavulanate-amoxicillin combination" OR "potassium clavulanate amoxicillin combination" OR "amoxycillin-clavulanic acid" OR "amoxycillin clavulanic acid" OR amox-clav OR "amox clav" OR "clavulanate potentiated amoxycillin" OR augmentin OR synulox OR spektramox OR clavulin OR azithromycin OR sumamed OR toraseptol OR vinzam OR zithromax OR azitrocin OR azadose OR ultreon OR zitromax OR "azithromycin dihydrate" OR "azithromycin monohydrate" OR goxal OR zentavion OR clarithromycin OR biacin OR "doxycycline monohydrate" OR "doxycycline hyclate" OR "doxycycline hemiethanolate" OR "doxycycline calcium" OR "doxycycline chinoin" OR vibramycin OR atridox OR doryx OR doxycycline-chinoin OR hydramycin OR oracea OR periostat OR vibra-tabs OR "vibra tabs" OR "vibramycin novum" OR vibravenos OR trichazol OR trichopol OR trivazol OR "metronidazole phosphoester" OR vagilen OR "metronidazole phosphate" OR danazol OR flagyl OR gineflavir OR metric OR metrodzhil OR metrogel OR metrogyl OR "metronidazole hydrochloride" OR "metronidazole monohydrochloride" OR clont OR octegra OR proflox OR "moxifloxacin hydrochloride" OR avelox OR avalox OR izilox OR actira OR spiramycine OR rovamycine OR selectomycin OR rovamycin OR "spiramycin adipate" OR tetrabid OR topicycline OR "achromycin v" OR hostacyclin OR "tetracycline hydrochloride" OR "tetracycline monohydrochloride" OR sustamycin OR achromycin</p> <p>3. 1 AND 2 AND LIMIT-TO PUBYEAR, 2021 OR LIMIT-TO PUBYEAR, 2020 OR LIMIT-TO PUBYEAR, 2019 OR LIMIT-TO PUBYEAR, 2018 OR LIMIT-TO PUBYEAR, 2017 OR LIMIT-TO PUBYEAR, 2016 OR LIMIT-TO PUBYEAR, 2015 OR LIMIT-TO PUBYEAR, 2014 OR LIMIT-TO PUBYEAR, 2013 OR LIMIT-TO PUBYEAR, 2012 OR LIMIT-TO PUBYEAR, 2011 OR LIMIT-TO PUBYEAR, 2010 OR LIMIT-TO PUBYEAR, 2009 OR LIMIT-TO PUBYEAR, 2008 OR LIMIT-TO PUBYEAR, 2007 OR LIMIT-TO PUBYEAR, 2006 OR LIMIT-TO PUBYEAR, 2005 OR LIMIT-TO PUBYEAR, 2004 OR LIMIT-TO PUBYEAR, 2003 OR LIMIT-TO PUBYEAR, 2002 OR LIMIT-TO PUBYEAR, 2001 OR LIMIT-TO PUBYEAR, 2000 AND LIMIT-TO LANGUAGE, "English" AND LIMIT-TO SUBJAREA, "DENT"</p> |

| No. | Date       | Database         | Search strategy                                                                                                                                                                                                                                                                                                                                                                                                                                                                                                                                                                                                                                                                                                                                                                                                                                                                                                                                                                                                                                                                                                                                                                                                                                                                                                                                                                                                                                                                                                                                                                                                                                                                                                                                                                                                                                                                                                                                                                                                                                                                                                                                                                                                                                                                                                                                                                                                                                                                                                                                                                                                                                                                                                                                                                                                                                                                                                                                                                                          |
|-----|------------|------------------|----------------------------------------------------------------------------------------------------------------------------------------------------------------------------------------------------------------------------------------------------------------------------------------------------------------------------------------------------------------------------------------------------------------------------------------------------------------------------------------------------------------------------------------------------------------------------------------------------------------------------------------------------------------------------------------------------------------------------------------------------------------------------------------------------------------------------------------------------------------------------------------------------------------------------------------------------------------------------------------------------------------------------------------------------------------------------------------------------------------------------------------------------------------------------------------------------------------------------------------------------------------------------------------------------------------------------------------------------------------------------------------------------------------------------------------------------------------------------------------------------------------------------------------------------------------------------------------------------------------------------------------------------------------------------------------------------------------------------------------------------------------------------------------------------------------------------------------------------------------------------------------------------------------------------------------------------------------------------------------------------------------------------------------------------------------------------------------------------------------------------------------------------------------------------------------------------------------------------------------------------------------------------------------------------------------------------------------------------------------------------------------------------------------------------------------------------------------------------------------------------------------------------------------------------------------------------------------------------------------------------------------------------------------------------------------------------------------------------------------------------------------------------------------------------------------------------------------------------------------------------------------------------------------------------------------------------------------------------------------------------------|
| 7.  | 13.09.2021 | Cochrane Library | <p>1. "anti bacterial agents" OR "anti-bacterial agents" OR "anti mycobacterial agents" OR "anti-mycobacterial agents" OR "antimycobacterial agents" OR "antibacterial agents" OR "bacteriocidal agents" OR "anti-bacterial compounds" OR "anti bacterial compounds" OR antibiotic OR antibiotics OR bacteriocides OR "penicillin antibiotics" OR penicillin OR penicillins OR "cephalosporin antibiotics" OR "cephalosporanic acids" OR amoxycillin OR amoxicilline OR "amoxicillin monopotassium salt" OR "amoxicillin sodium" OR "amoxicillin monosodium salt" OR "amoxicillin anhydrous" OR "amoxicillin trihydrate" OR hydroxyampicillin OR actimoxiclamoxy OR penamox OR polymox OR trimox OR wymox OR amoxil OR "amoxicillin potassium clavulanate combination " OR co-amoxiclav OR "co amoxiclav" OR coamoxiclav OR "amoxicillin-clavulanic acid" OR "amoxicillin clavulanic acid" OR amoxi-clavulanate OR "amoxi clavulanate" OR "potassium clavulanate-amoxicillin combination" OR "potassium clavulanate amoxicillin combination" OR "amoxycillin-clavulanic acid" OR "amoxycillin clavulanic acid" OR amox-clav OR "amox clav" OR "clavulanate potentiated amoxycillin" OR augmentin OR synulox OR spektramox OR clavulin OR azithromycin OR sumamed OR toraseptol OR vinzam OR zithromax OR azitrocin OR azadose OR ultreon OR zitromax OR "azithromycin dihydrate" OR "azithromycin monohydrate" OR goxal OR zentavion OR clarithromycin OR biaxin OR "doxycycline monohydrate" OR "doxycycline hyclate" OR "doxycycline hemiethanolate" OR "doxycycline calcium" OR "doxycycline chinoin" OR vibramycin OR atridox OR doryx OR doxycycline-chinoin OR hydramycin OR oracea OR periostat OR vibra-tabs OR "vibra tabs" OR "vibramycin novum" OR vibravenos OR trichazol OR trichopol OR trivazol OR "metronidazole phosphoester" OR vagilen OR "metronidazole phosphate" OR danazol OR flagyl OR gineflavir OR metric OR metrodzhil OR metrogel OR metrogyl OR "metronidazole hydrochloride" OR "metronidazole monohydrochloride" OR clont OR octegra OR proflox OR "moxifloxacin hydrochloride" OR avelox OR avalox OR izilox OR actira OR spiramycine OR rovamycine OR selectomycin OR rovamycin OR "spiramycin adipate" OR tetrabid OR topicycline OR "achromycin v" OR hostacyclin OR "tetracycline hydrochloride" OR "tetracycline monohydrochloride" OR sustamycin OR achromycin:ti,ab,kw</p> <p>2. pericementitides OR pericementitis OR periodontitides OR periodontitis OR "adult periodontitides" OR "adult periodontitis" OR "chronic periodontitides" OR "chronic periodontitis" OR "aggressive periodontitis" OR "circumpubertal periodontitis" OR "early onset periodontitis" OR "early-onset periodontitides" OR "early-onset periodontitis" OR "juvenile periodontitides" OR "juvenile periodontitis" OR "prepubertal periodontitis" OR periodontoses OR periodontosis:ti,ab,kw"</p> <p>3. 1 AND 2; Word variations have been searched; Custom year range: 2000 – 2021</p> |
| 8.  | 13.09.2021 | IMSEAR           | <p>1. tw:tw:pericementitides OR pericementitis OR periodontitides OR periodontitis OR "adult periodontitides" OR "adult periodontitis" OR "chronic periodontitides" OR "chronic periodontitis" OR "aggressive periodontitis" OR "circumpubertal periodontitis" OR "early onset periodontitis" OR "early-onset periodontitides" OR "early-onset periodontitis" OR "juvenile periodontitides" OR "juvenile periodontitis" OR "prepubertal periodontitis" OR periodontoses OR periodontosis</p> <p>2. tw:"anti bacterial agents" OR "anti-bacterial agents" OR "anti mycobacterial agents" OR "anti-mycobacterial agents" OR "antimycobacterial agents" OR "antibacterial agents" OR "bacteriocidal agents" OR "anti-bacterial compounds" OR "anti bacterial compounds" OR antibiotic OR antibiotics OR bacteriocides OR "penicillin antibiotics" OR penicillin OR penicillins OR "cephalosporin antibiotics" OR "cephalosporanic acids" OR amoxycillin OR amoxicilline OR "amoxicillin monopotassium salt" OR "amoxicillin sodium" OR "amoxicillin monosodium salt" OR "amoxicillin anhydrous" OR "amoxicillin trihydrate" OR hydroxyampicillin OR actimoxiclamoxy OR penamox OR polymox OR trimox OR wymox OR amoxil OR "amoxicillin potassium clavulanate combination " OR co-amoxiclav OR "co amoxiclav" OR coamoxiclav OR "amoxicillin-clavulanic acid" OR "amoxicillin clavulanic acid" OR amoxi-clavulanate OR "amoxi clavulanate" OR "potassium clavulanate-amoxicillin combination" OR "potassium clavulanate amoxicillin combination" OR "amoxycillin-clavulanic acid" OR "amoxycillin clavulanic acid" OR amox-clav OR "amox clav" OR "clavulanate potentiated amoxycillin" OR augmentin OR synulox OR spektramox OR clavulin OR azithromycin OR sumamed OR toraseptol OR vinzam OR zithromax OR azitrocin OR azadose OR ultreon OR zitromax OR "azithromycin dihydrate" OR "azithromycin monohydrate" OR goxal OR zentavion OR clarithromycin OR biaxin OR "doxycycline monohydrate" OR "doxycycline hyclate" OR "doxycycline hemiethanolate" OR "doxycycline calcium" OR "doxycycline</p>                                                                                                                                                                                                                                                                                                                                                                                                                                                                                                                                                                                                                                                                                                                                                                                                                                                                                                      |

| No. | Date | Database | Search strategy                                                                                                                                                                                                                                                                                                                                                                                                                                                                                                                                                                                                                                                                                                                                                                                                                                                            |
|-----|------|----------|----------------------------------------------------------------------------------------------------------------------------------------------------------------------------------------------------------------------------------------------------------------------------------------------------------------------------------------------------------------------------------------------------------------------------------------------------------------------------------------------------------------------------------------------------------------------------------------------------------------------------------------------------------------------------------------------------------------------------------------------------------------------------------------------------------------------------------------------------------------------------|
|     |      |          | <p>chinoin" OR vibramycin OR atridox OR doryx OR doxycycline-chinoin OR hydramycin OR oracea OR periostat OR vibra-tabs OR "vibra tabs" OR "vibramycin novum" OR vibravenos OR trichazol OR trichopol OR trivazol OR "metronidazole phosphoester" OR vagilen OR "metronidazole phosphate" OR danazol OR flagyl OR gineflavir OR metric OR metrodzhil OR metrogel OR metrogy1 OR "metronidazole hydrochloride" OR "metronidazole monohydrochloride" OR clont OR octegra OR proflox OR "moxifloxacin hydrochloride" OR avelox OR avalox OR izilox OR actira OR spiramycine OR rovamycine OR selectomycin OR rovamycin OR "spiramycin adipate" OR tetrabid OR topicycline OR "achromycin v" OR hostacyclin OR "tetracycline hydrochloride" OR "tetracycline monohydrochloride" OR sustamycin OR achromycin</p> <p>3. 1 AND 2 AND la:"en" AND year_cluster: [2000 TO 2021]</p> |

**Table S2.** Excluded studies and reasons for exclusion

| No. | Authors (Year)            | Journal                      | Title                                                                                                                                                                                  | Reason for exclusion                                                                                                                                                                            |
|-----|---------------------------|------------------------------|----------------------------------------------------------------------------------------------------------------------------------------------------------------------------------------|-------------------------------------------------------------------------------------------------------------------------------------------------------------------------------------------------|
| 1.  | Aimetti et al. (2012)     | <i>J Clin Periodontol</i>    | Full-mouth disinfection and systemic antimicrobial therapy in generalized aggressive periodontitis: a randomized, placebo-controlled trial.                                            | Used of subgingival 1% CHX gel during NSPT and repeated after 8 days, and 0.2% CHX rinse twice a day for 1 min and to spray the tonsils twice daily with a 0.2% CHX for 2 months post-treatment |
| 2.  | Alyousef et al. (2017)    | <i>Microb Pathog</i>         | Chemically modified tetracyclines an emerging host modulator in chronic periodontitis patients: A randomized, double-blind, placebo-controlled, clinical trial.                        | Not commercially available (Chemically modified tetracycline; Incyclinide)                                                                                                                      |
| 3.  | Aral et al. (2019)        | <i>Oral Dis</i>              | Six-month clinical outcomes of non-surgical periodontal treatment with antibiotics on apoptosis markers in aggressive periodontitis.                                                   | Prospective interventional study                                                                                                                                                                |
| 4.  | Baltacioglu et al. (2011) | <i>J Can Dent Assoc</i>      | Analysis of clinical results of systemic antimicrobials combined with nonsurgical periodontal treatment for generalized aggressive periodontitis: a pilot study.                       | Non-randomised clinical trial                                                                                                                                                                   |
| 5.  | Bamedi et al. (2018)      | <i>Implant Dent</i>          | Evaluation the Effect of Adjuvant Therapy with Ciprofloxacin in Non-surgical Treatment of Periodontal Diseases.                                                                        | Poster presentation abstract without full text                                                                                                                                                  |
| 6.  | Boia et al. (2018)        | <i>Rom J Morphol Embryol</i> | Evaluation of antioxidant capacity and clinical assessment of patients with chronic periodontitis treated with non-surgical periodontal therapy and adjunctive systemic antibiotherapy | Non-randomised clinical trial                                                                                                                                                                   |
| 7.  | Carvalho et al. (2004)    | <i>J Clin Periodontol</i>    | Scaling and root planing, systemic metronidazole and professional plaque removal in the treatment of chronic periodontitis in a Brazilian population. I. clinical results.             | Insufficient outcome data                                                                                                                                                                       |



| No. | Authors (Year)         | Journal                   | Title                                                                                                                                                                                                                                        | Reason for exclusion                                                                                                        |
|-----|------------------------|---------------------------|----------------------------------------------------------------------------------------------------------------------------------------------------------------------------------------------------------------------------------------------|-----------------------------------------------------------------------------------------------------------------------------|
| 8.  | Casarin et al. (2012)  | <i>J Periodontol</i>      | The combination of amoxicillin and metronidazole improves clinical and microbiologic results of one-stage, full-mouth, ultrasonic debridement in aggressive periodontitis treatment.                                                         | Insufficient outcome data                                                                                                   |
| 9.  | Caton et al. (2000)    | <i>J Clin Periodontol</i> | Treatment with subantimicrobial dose doxycycline improves the efficacy of scaling and root planing in patients with adult periodontitis.                                                                                                     | Discontinued adjunct (SDD 20mg)                                                                                             |
| 10. | Caton et al. (2001)    | <i>J Periodontol</i>      | Treatment with subantimicrobial dose doxycycline improves the efficacy of scaling and root planing in patients with adult periodontitis.                                                                                                     | Discontinued adjunct (SDD 20mg)                                                                                             |
| 11. | Choi et al. (2004)     | <i>J Periodontol Res</i>  | Effects of sub-antimicrobial dose doxycycline therapy on crevicular fluid MMP-8, and gingival tissue MMP-9, TIMP-1 and IL-6 levels in chronic periodontitis.                                                                                 | Discontinued adjunct (SDD 20mg; Periostat)                                                                                  |
| 12. | Cionca et al. (2009)   | <i>J Periodontol</i>      | Amoxicillin and metronidazole as an adjunct to full-mouth scaling and root planing of chronic periodontitis.                                                                                                                                 | Used of 0.2% CHX bd for 10 days starting after first session of debridement                                                 |
| 13. | Cionca et al. (2010)   | <i>J Periodontol</i>      | Microbiologic testing and outcomes of full-mouth scaling and root planing with or without amoxicillin/metronidazole in chronic periodontitis.                                                                                                | Used of 0.2% CHX bd for 10 days starting after first session of debridement                                                 |
| 14. | Cortelli et al. (2008) | <i>J Oral Sci</i>         | A double-blind randomized clinical trial of subgingival minocycline for chronic periodontitis.                                                                                                                                               | The same trial and outcomes as Cortelli et al. (2006), focus on microbiologic findings.                                     |
| 15. | Cosgarea et al. (2017) | <i>PloS One</i>           | One year results of a randomized controlled clinical study evaluating the effects of non-surgical periodontal therapy of chronic periodontitis in conjunction with three or seven days systemic administration of amoxicillin/metronidazole. | Used of 0.2% CHX digluconate solution and to brush their teeth with 0.2% CHX digluconate toothpaste for 14 days twice daily |
| 16. | Cosgarea et al. (2016) | <i>J Clin Periodontol</i> | Non-surgical periodontal treatment in conjunction with 3 or 7 days systemic administration of amoxicillin and metronidazole in severe chronic periodontitis patients. A placebo-controlled randomized clinical study.                        | Used of 0.2% CHX digluconate solution and to brush their teeth with 0.2% CHX digluconate toothpaste for 14 days twice daily |
| 17. | Emingil et al. (2004)  | <i>J Periodontol</i>      | The effect of adjunctive low-dose doxycycline therapy on clinical parameters and gingival crevicular fluid matrix metalloproteinase-8 levels in chronic periodontitis.                                                                       | Discontinued adjunct (SDD 20mg; Periostat)                                                                                  |
| 18. | Emingil et al. (2004b) | <i>J Periodontol</i>      | Effectiveness of adjunctive low-dose doxycycline therapy on clinical parameters and gingival crevicular fluid laminin-5 gamma2 chain levels in chronic periodontitis.                                                                        | The same RCT as Emingil et al. (2004a)                                                                                      |
| 19. | Emingil et al. (2008)  | <i>J Periodontol</i>      | The effect of adjunctive subantimicrobial dose doxycycline therapy on GCF EMMPRIN levels in chronic periodontitis.                                                                                                                           | Discontinued adjunct (SDD 20mg; Periostat)                                                                                  |

| No. | Authors (Year)         | Journal                           | Title                                                                                                                                                                                           | Reason for exclusion                                                                  |
|-----|------------------------|-----------------------------------|-------------------------------------------------------------------------------------------------------------------------------------------------------------------------------------------------|---------------------------------------------------------------------------------------|
| 20. | Emingil et al. (2006)  | <i>Inflamm Res</i>                | Adjunctive low-dose doxycycline therapy effect on clinical parameters and gingival crevicular fluid tissue plasminogen activator levels in chronic periodontitis.                               | Discontinued adjunct (SDD 20mg; Periostat)                                            |
| 21. | Emingil et al. (2011)  | <i>J Periodontol</i>              | Subantimicrobial-dose doxycycline and cytokine-chemokine levels in gingival crevicular fluid.                                                                                                   | The same trial and outcomes as Emingil et al. (2006)                                  |
| 22. | Feres et al. (2001)    | <i>J Clin Periodontol</i>         | Change in subgingival microbial profiles in adult periodontitis subjects receiving either systemically-administered amoxicillin or metronidazole.                                               | Non-randomised clinical trial                                                         |
| 23. | Feres et al. (2012)    | <i>J Clin Periodontol</i>         | Metronidazole alone or with amoxicillin as adjuncts to non-surgical treatment of chronic periodontitis: a 1-year double-blinded, placebo-controlled, randomized clinical trial.                 | Used of CHX mouth rinse in combination with the intervention for some subjects        |
| 24. | Fujii et al. (2004)    | <i>Perio</i>                      | Effect of Systemically Administered Azithromycin in Early Onset Aggressive Periodontitis.                                                                                                       | Non-randomised clinical trial                                                         |
| 25. | Golub et al. (2001)    | <i>J Clin Periodontol</i>         | Adjunctive treatment with subantimicrobial doses of doxycycline: effects on gingival fluid collagenase activity and attachment loss in adult periodontitis.                                     | Discontinued adjunct (SDD 20mg)                                                       |
| 26. | Goodson et al. (2012)  | <i>J Clin Periodontol</i>         | Control of periodontal infections: a randomized controlled trial I. The primary outcome attachment gain and pocket depth reduction at treated sites.                                            | Used of 0.12% CHX twice daily mouth rinse during study period                         |
| 27. | Guentsch et al. (2008) | <i>J Periodontol</i>              | Moxifloxacin as an adjunctive antibiotic in the treatment of severe chronic periodontitis.                                                                                                      | Treatment started with rinsing with 0.12% CHX                                         |
| 28. | Guerrero et al. (2005) | <i>J Clin Periodontol</i>         | Adjunctive benefits of systemic amoxicillin and metronidazole in non-surgical treatment of generalized aggressive periodontitis: a randomized placebo-controlled clinical trial.                | Used of 0.2% CHX rinse (supplied to improve compliance) bd for 2 weeks post-treatment |
| 29. | Gürkan et al. (2005)   | <i>J Clin Periodontol</i>         | Adjunctive subantimicrobial dose doxycycline: effect on clinical parameters and gingival crevicular fluid transforming growth factor-beta levels in severe, generalized chronic periodontitis.  | Discontinued adjunct (SDD 20mg; Periostat)                                            |
| 30. | Gürkan et al. (2008)   | <i>Int J Dent Hyg</i>             | Post-treatment effects of subantimicrobial dose doxycycline on clinical parameters and gingival crevicular fluid transforming growth factor-beta1 in severe, generalized chronic periodontitis. | Discontinued adjunct (SDD 20mg; Periostat)                                            |
| 31. | Haerian et al. (2012)  | <i>J Periodontol Implant Dent</i> | Effectiveness of Adjunctive Subantimicrobial Dose Doxycycline on Phase I of Periodontal Therapy.                                                                                                | Discontinued adjunct (SDD 20mg; Periostat)                                            |
| 32. | Haffaje et al. (2007)  | <i>J Clin Periodontol</i>         | Clinical changes following four different periodontal therapies for the treatment of chronic periodontitis: 1-year results.                                                                     | Insufficient outcome data                                                             |

| No. | Authors (Year)         | Journal                     | Title                                                                                                                                                                                      | Reason for exclusion                                                                                                                                  |
|-----|------------------------|-----------------------------|--------------------------------------------------------------------------------------------------------------------------------------------------------------------------------------------|-------------------------------------------------------------------------------------------------------------------------------------------------------|
| 33. | Heller et al. (2011)   | <i>J Clin Periodontol</i>   | Impact of systemic antimicrobials combined with anti-infective mechanical debridement on the microbiota of generalized aggressive periodontitis: a 6-month RCT.                            | Long-term used of CHX gel and solution                                                                                                                |
| 34. | Lee et al. (2004)      | <i>J Periodontol</i>        | Effect of subantimicrobial dose doxycycline as an effective adjunct to scaling and root planing.                                                                                           | Discontinued adjunct (SDD 20mg)                                                                                                                       |
| 35. | Matthews et al. (2006) | <i>Evid Based Dent</i>      | Adjunctive antibiotics in the treatment of generalized aggressive periodontitis.                                                                                                           | Commentary of RCT by Guerrero et al. (2005)                                                                                                           |
| 36. | Mdala et al. (2012)    | <i>J Oral Microbiol</i>     | Multilevel analysis of clinical parameters in chronic periodontitis after root planing/scaling, surgery, and systemic and local antibiotics: 2-year results.                               | Insufficient outcome data                                                                                                                             |
| 37. | Mestrik et al. (2010)  | <i>J Clin Periodontol</i>   | Short-term benefits of the adjunctive use of metronidazole plus amoxicillin in the microbial profile and in the clinical parameters of subjects with generalized aggressive periodontitis. | Used of 15 ml of 0.12% CHX bd for 60 days for 1 min. in the morning (30 min. after breakfast and tooth brushing) and at night (before going to sleep) |
| 38. | Mestrik et al. (2012)  | <i>J Clin Periodontol</i>   | The effects of adjunctive metronidazole plus amoxicillin in the treatment of generalized aggressive periodontitis: a 1-year double-blinded, placebo-controlled, randomized clinical trial. | Used of 15 ml of 0.12% CHX bd for 60 days for 1 min. in the morning (30 min. after breakfast and tooth brushing) and at night (before going to sleep) |
| 39. | Morales et al. (2018)  | <i>J Appl Oral Sci</i>      | Microbiological and clinical effects of probiotics and antibiotics on nonsurgical treatment of chronic periodontitis: a randomized placebo-controlled trial with 9-month follow-up.        | The same trial and outcomes as Morales et al. (2021)                                                                                                  |
| 40. | Novak et al. (2002)    | <i>J Periodontol</i>        | Adjunctive benefits of subantimicrobial dose doxycycline in the management of severe, generalized, chronic periodontitis.                                                                  | Discontinued adjunct (SDD 20mg)                                                                                                                       |
| 41. | Novak et al. (2008)    | <i>J Periodontol</i>        | Combining host modulation and topical antimicrobial therapy in the management of moderate to severe periodontitis: a randomized multicenter trial.                                         | Discontinued adjunct (SDD 20mg)                                                                                                                       |
| 42. | Pârvu et al. (2013)    | <i>Acta Pharmacol Sin</i>   | Efficacy of subantimicrobial-dose doxycycline against nitrosative stress in chronic periodontitis.                                                                                         | Discontinued adjunct (SDD 20mg)                                                                                                                       |
| 43. | Pradeep et al. (2011)  | <i>Arch Oral Biol</i>       | Clarithromycin, as an adjunct to non-surgical periodontal therapy for chronic periodontitis: a double blinded, placebo controlled, randomized clinical trial.                              | Insufficient outcome data                                                                                                                             |
| 44. | Pradeep et al. (2012)  | <i>J Periodontol</i>        | Systemic ornidazole as an adjunct to non-surgical periodontal therapy in the treatment of chronic periodontitis: a randomized, double-masked, placebo-controlled clinical trial.           | Used of 0.2% CHX mouth rinse twice daily                                                                                                              |
| 45. | Pradeep et al. (2015)  | <i>J Investig Clin Dent</i> | Clinical and microbiological effects of levofloxacin in the treatment of chronic periodontitis: a randomized, placebo-controlled clinical trial.                                           | Used of 0.2% CHX mouth rinse twice daily during study period                                                                                          |

| No. | Authors (Year)            | Journal                   | Title                                                                                                                                                                                                              | Reason for exclusion                                                                                   |
|-----|---------------------------|---------------------------|--------------------------------------------------------------------------------------------------------------------------------------------------------------------------------------------------------------------|--------------------------------------------------------------------------------------------------------|
| 46. | Preshaw et al. (2004)     | <i>J Periodontol</i>      | Subantimicrobial dose doxycycline enhances the efficacy of scaling and root planing in chronic periodontitis: a multicenter trial.                                                                                 | Discontinued adjunct (SDD 20mg; Periostat)                                                             |
| 47. | Preshaw et al. (2008)     | <i>J Periodontol</i>      | Modified-release subantimicrobial dose doxycycline enhances scaling and root planing in subjects with periodontal disease.                                                                                         | Insufficient outcome data                                                                              |
| 48. | Preus et al. (2017)       | <i>J Clin Periodontol</i> | A double-masked Randomized Clinical Trial (RCT) comparing four periodontitis treatment strategies: 5-year clinical results.                                                                                        | Exclusion of subjects harbouring bacteria with known insensitivity or low sensitivity to metronidazole |
| 49. | Preus et al. (2013)       | <i>J Periodontol</i>      | A randomized, double-masked clinical trial comparing four periodontitis treatment strategies: 1-year clinical results.                                                                                             | Exclusion of subjects harbouring bacteria with known insensitivity or low sensitivity to metronidazole |
| 50. | Pururucker et al. (2001)  | <i>J Periodontol</i>      | Local versus systemic adjunctive antibiotic therapy in 28 patients with generalized aggressive periodontitis.                                                                                                      | Not a placebo controlled RCT                                                                           |
| 51. | Rooney et al. (2002)      | <i>J Clin Periodontol</i> | Adjunctive effects to non-surgical periodontal therapy of systemic metronidazole and amoxycillin alone and combined. A placebo controlled study.                                                                   | Insufficient outcome data                                                                              |
| 52. | Silva-Senem et al. (2013) | <i>J Clin Periodontol</i> | Clinical and microbiological effects of systemic antimicrobials combined to an anti-infective mechanical debridement for the management of aggressive periodontitis: a 12-month randomized controlled trial.       | Long-term used of CHX gel and solution                                                                 |
| 53. | Smith et al. (2002)       | <i>J Clin Periodontol</i> | A double-blind placebo-controlled trial of azithromycin as an adjunct to non-surgical treatment of periodontitis in adults: clinical results.                                                                      | Insufficient outcome data                                                                              |
| 54. | Tüter et al. (2010)       | <i>J Periodontol</i>      | Effects of scaling and root planing and subantimicrobial dose doxycycline on gingival crevicular fluid levels of matrix metalloproteinase-8, -13 and serum levels of HsCRP in patients with chronic periodontitis. | Discontinued adjunct (SDD 20mg; Periostat)                                                             |
| 55. | Varela et al. (2011)      | <i>J Periodontol</i>      | Systemic antimicrobials adjunctive to a repeated mechanical and antiseptic therapy for aggressive periodontitis: a 6-month randomized controlled trial.                                                            | Long-term used of CHX gel and solution                                                                 |
| 56. | Vergani et al. (2004)     | <i>Braz Oral Res</i>      | Systemic use of metronidazole in the treatment of chronic periodontitis: a pilot study using clinical, microbiological, and enzymatic evaluation.                                                                  | Insufficient outcome data                                                                              |
| 57. | Yek et al. (2010)         | <i>J Periodontol</i>      | Efficacy of amoxicillin and metronidazole combination for the management of generalized aggressive periodontitis.                                                                                                  | Insufficient outcome data                                                                              |

**Table S3.** General characteristics of included studies according to provided adjuncts

| Author (Year)               | Country   | Funding    | Centre | Trial design | Population                         | Criteria                                                                                                                                                           | Age mean ± SD (range) |                  | Gender (M/F) |         | Smokers (%) |         |
|-----------------------------|-----------|------------|--------|--------------|------------------------------------|--------------------------------------------------------------------------------------------------------------------------------------------------------------------|-----------------------|------------------|--------------|---------|-------------|---------|
|                             |           |            |        |              |                                    |                                                                                                                                                                    | Test                  | Control          | Test         | Control | Test        | Control |
| Amoxicillin + Metronidazole |           |            |        |              |                                    |                                                                                                                                                                    |                       |                  |              |         |             |         |
| Ardila et al. (2020)        | Colombia  | University | Single | Parallel     | Generalised AgP                    | ≥ 6 permanent teeth with at least 1 site each with PD and CAL ≥5 mm<br>≥ 6 teeth (exclude 1st molars and incisors) with at least 1 site each with PD and CAL ≥5 mm | 26.1 ± 3.9            | 27.1± 2.9        | 5/7          | 4/8     | NS          | NS      |
| Liaw et al. (2019)          | Australia | University | Single | Parallel     | Generalised moderate to severe ChP | > 30% of teeth with PPD ≥5 mm, CAL ≥3 mm and BOP                                                                                                                   | 45 (40 – 59)          | 55 (49.5 – 58.5) | 4/9          | 7/6     | NS          | NS      |
| Borges et al. (2017) *      | Brazil    | Government | Single | Parallel     | Generalised ChP                    | ≥ 30% of the sites with PD and CAL ≥4 mm and BOP<br>≥ 6 teeth with at least one site each with PD and CAL ≥ 5 mm                                                   | 46.6 ± 8.9            | 45.6 ± 8.0       | 8/14         | 9/13    | NS          | NS      |
|                             |           |            |        |              |                                    |                                                                                                                                                                    | 45.9 ± 7.8            |                  | 10/12        |         |             |         |
|                             |           |            |        |              |                                    |                                                                                                                                                                    | 47.0 ± 8.6            |                  | 11/11        |         |             |         |
|                             |           |            |        |              |                                    |                                                                                                                                                                    | 48.5 ± 7.4            |                  | 10/12        |         |             |         |
| Dukić et al. (2016)         | Serbia    | Private    | Single | Parallel     | Progressed form of periodontitis   | PD ≥ 5 mm + BOP                                                                                                                                                    | 49.3                  |                  | 55/35        |         | NR          | NR      |
| Saleh et al. (2016)         | Australia | Private    | Single | Parallel     | Moderate to advanced periodontitis | ≥ 8 sites with PPD ≥5mm, CAL ≥5mm BOP                                                                                                                              | 52.1 ± 12.2           | 56.1 ± 12.8      | 4/9          | 5/7     | NS          | NS      |
| Taiete et al. (2016)        | Brazil    | Government | Single | Parallel     | Generalised AgP                    | ≥ 8 teeth with PPD ≥ 5 mm and BoP (having at least two with PPD ≥ 7 mm)                                                                                            | 27.5 ± 5.5            | 28.5 ± 5.1       | 6/12         | 6/15    | NS          | NS      |
| Harks et al. (2015)         | Germany   | Government | Multi  | Parallel     | Moderate to Severe ChP and AgP     | CAL >3 mm and PPDs of ≥ 6 mm at a minimum of 4 teeth                                                                                                               | 52.6 ± 10.4           | 50.5 ± 10.5      | 149/102      | 154/101 | 29.6        | 25.5    |
| Silva et al. (2011)         | Brazil    | Government | Single | Parallel     | Generalised ChP                    | ≥ 6 teeth with at least one site each with PD and CAL ≥5 mm<br>≥ 30% of the sites with PD and CAL≥4 mm and BOP                                                     | 41.2 ± 6.1            | 45.5 ± 9.6       | 8/9          | 7/10    | NS          | NS      |
| Buchmann et al. (2010)      | Germany   | Private    | Single | Parallel     | AgP                                | PD ≥5 mm at 8 sites or within each quadrant                                                                                                                        | 42.4 ± 7.5            |                  | NR           | NR      | NS          | NS      |

| Author (Year)              | Country     | Funding    | Centre | Trial design | Population                          | Criteria                                                                                                                                        | Age mean $\pm$ SD (range) |                  | Gender (M/F) |         | Smokers (%) |         |
|----------------------------|-------------|------------|--------|--------------|-------------------------------------|-------------------------------------------------------------------------------------------------------------------------------------------------|---------------------------|------------------|--------------|---------|-------------|---------|
|                            |             |            |        |              |                                     |                                                                                                                                                 | Test                      | Control          | Test         | Control | Test        | Control |
| Ribeiro et al. (2009)      | Brazil      | Government | Single | Parallel     | Severe ChP                          | $\geq 8$ teeth with PD $\geq 5$ mm and BOP $\geq 2$ of the 8 teeth had PD $\geq 7$ mm, and in 2 additional teeth the pockets had PD $\geq 6$ mm | 46 (34 – 55)              | 46.2 (30 – 66)   | 4/9          | 3/9     | NS          | NS      |
| Moeintaghavi et al. (2007) | Iran        | NR         | Single | Parallel     | Severe ChP                          | $\geq 1$ site in at least 3 of the 4 quadrants with a PPD $\geq 5$ mm and CAL of $>3$ mm, showing BOP                                           | 34.0 $\pm$ 7.8            | 35.0 $\pm$ 9.0   | 12/16        | 9/13    | NS          | NS      |
| Xajigeorgiou et al. (2006) | Greece      | NR         | Single | Parallel     | Generalised AgP                     | $>30\%$ of sites with CAL $\geq 1$ mm                                                                                                           | 38.8 $\pm$ 8.7            | 37 $\pm$ 5.6     | 5/5          | 6/5     | 30          | 36.4    |
| Winkel et al. (2001)       | Netherlands | NR         | Multi  | Parallel     | Periodontitis                       | $\geq 1$ site in at least 3 of the 4 quadrants with a PPD of $\geq 6$ mm and CAL $\geq 3$ mm, showing BOP                                       | 45 (32 – 63)              | 40 (28 – 55)     | 11/12        | 10/16   | 60.9        | 69.2    |
| <b>Azithromycin</b>        |             |            |        |              |                                     |                                                                                                                                                 |                           |                  |              |         |             |         |
| Morales et al. (2021)      | Chile       | Government | Single | Parallel     | ChP                                 | $\geq 5$ teeth with periodontal sites with PPD $\geq 5$ mm and CAL $\geq 3$ mm, BOP $\geq 20\%$                                                 | 49.0 $\pm$ 7.9            | 52.8 $\pm$ 7.5   | 10/5         | 8/7     | 18.7        | 40      |
| Povšič et al. (2021)       | Slovenia    | Government | Single | Parallel     | Stage III or Stage IV periodontitis | Interdental CAL measuring $\geq 5$ mm                                                                                                           | 44.0 $\pm$ 8.5            | 45.5 $\pm$ 10.5  | 12/7         | 14/5    | 21.1        | 26.3    |
| Čuk et al. (2020)          | Slovenia    | Government | Single | Parallel     | Moderate to advanced periodontitis  | PD $\geq 5$ mm at a minimum of 4 teeth in 4 different quadrants                                                                                 | 44.0 $\pm$ 8.5            | 45.4 $\pm$ 10.5  | 12/7         | 14/5    | 21.1        | 26.3    |
| Liaw et al. (2019)         | Australia   | University | Single | Parallel     | Generalised moderate to severe ChP  | $> 30\%$ of teeth with PPD $\geq 5$ mm, CAL $\geq 3$ mm and BOP                                                                                 | 58.5 (52 – 63.3)          | 55 (49.5 – 58.5) | 4/8          | 7/6     | NS          | NS      |
| Saleh et al. (2016)        | Australia   | Private    | Single | Parallel     | Moderate to advanced periodontitis  | $\geq 8$ sites with PPD $\geq 5$ mm, CAL $\geq 5$ mm BOP                                                                                        | 56.3 $\pm$ 9.9            | 56.1 $\pm$ 12.8  | 4/8          | 5/7     | NS          | NS      |
| Fonseca et al. (2015)      | Brazil      | Government | Single | Parallel     | Mild to moderate ChP                | $\leq 5$ mm CAL                                                                                                                                 | 44.6 $\pm$ 8.8 (35 – 60)  |                  | 33/52        |         | 15.3        |         |
| Emingil et al. (2012)      | Turkey      | University | Single | Parallel     | Generalised AgP                     | CAL of $\geq 5$ mm and PPD of $\geq 6$ mm on $\geq 8$ teeth (at least 3 of which were other than central incisors or first molars)              | 28.8 $\pm$ 4.4            | 29.6 $\pm$ 5.9   | 9/7          | 8/8     | 43.8        | 38.5    |
| Han et al. (2012)          | Turkey      | University | Single | Parallel     | Generalised ChP                     | $>30$ sites with $\geq 5$ mm CAL $\geq 2$ sites with a PD $\geq 6$ mm + BOP in each quadrant                                                    | 46.8 $\pm$ 5.1            | 44.8 $\pm$ 5.0   | 10/4         | 8/6     | 42.8        | 50.0    |

| Author (Year)                | Country | Funding    | Centre | Trial design | Population                       | Criteria                                                                                                                                                                                  | Age mean ± SD (range) |              | Gender (M/F) |         | Smokers (%) |         |
|------------------------------|---------|------------|--------|--------------|----------------------------------|-------------------------------------------------------------------------------------------------------------------------------------------------------------------------------------------|-----------------------|--------------|--------------|---------|-------------|---------|
|                              |         |            |        |              |                                  |                                                                                                                                                                                           | Test                  | Control      | Test         | Control | Test        | Control |
| Sampaio et al. (2011)        | Brazil  | Government | Single | Parallel     | Generalised ChP                  | ≥ 30% of the sites with PD and CAL ≥5 mm and BOP<br>≥ 3 non-contiguous inter-proximal sites with PD and CAL ≥7 mm and 2 other non-contiguous inter-proximal sites with PD and CAL ≥6 mm1f | 44.4 ± 7.4            | 43.5 ± 5.9   | 13/7         | 11/9    | 25          | 25      |
| Haas et al. (2008)           | Brazil  | Government | Single | Parallel     | AgP                              | PPD and CAL of ≥4 mm + BOP in at least one incisor and one first molar                                                                                                                    | 22.5 ± 3.6            | 20.1 ± 3.6   | 5/7          | 8/4     | 25.0        | 17.0    |
| Gomi et al. (2007)           | Japan   | NR         | Single | Parallel     | Severe ChP                       | average PD of >4 mm with BOP                                                                                                                                                              | 45.4 ± 14.3           | 51.0 ± 8.8   | 8/9          | 8/9     | NS          | NS      |
| Cefixime                     |         |            |        |              |                                  |                                                                                                                                                                                           |                       |              |              |         |             |         |
| Dukić et al. (2016)          | Serbia  | Private    | Single | Parallel     | Progressed form of periodontitis | PD ≥ 5 mm + BOP                                                                                                                                                                           | 49.3                  |              | 55/35        |         | NR          | NR      |
| Clarithromycin               |         |            |        |              |                                  |                                                                                                                                                                                           |                       |              |              |         |             |         |
| Bechara Andere et al. (2018) | Brazil  | Government | Single | Parallel     | Generalised AgP                  | PD and CAL ≥ 5 mm and with concomitant BoP                                                                                                                                                | 33.11 ± 4.26          | 31.26 ± 4.73 | 1/17         | 1/17    | NS          | NS      |
| Suryaprasanna et al. (2018)  | India   | Nil        | Single | Parallel     | ChP                              | PD >5 mm, CAL > 3mm                                                                                                                                                                       | (30 – 50)             |              | NR           | NR      | NS          | NS      |
| Andere et al. (2017)         | Brazil  | Government | Single | Parallel     | Generalised AgP                  | ≥ 6 sites with PPD and CAL ≥5 mm + BOP and at least 2 sites with PD ≥7 mm                                                                                                                 | 31.4 ± 3.7            | 31.3 ± 4.6   | 1/19         | 1/19    | NS          | NS      |
| Clindamycin                  |         |            |        |              |                                  |                                                                                                                                                                                           |                       |              |              |         |             |         |
| Sigusch et al. (2001)        | Germany | NR         | Single | Parallel     | Generalised Periodontitis        | an average of 16 sites with PD >8 mm                                                                                                                                                      | 32.4 (NR)             |              | 20/28        |         | NS          | NS      |
| Doxycycline                  |         |            |        |              |                                  |                                                                                                                                                                                           |                       |              |              |         |             |         |
| Xajigeorgiou et al. (2006)   | Greece  | NR         | Single | Parallel     | Generalised AgP                  | >30% of sites with CAL≥ 1mm                                                                                                                                                               | 38.5 ± 4.7            | 37 ± 5.6     | 4/6          | 6/5     | 30          | 36.4    |
| Sigusch et al. (2001)        | Germany | NR         | Single | Parallel     | Generalised Peridontitis         | an average of 16 sites with PD >8 mm                                                                                                                                                      | 32.4 (NR)             |              | 20/28        |         | NS          | NS      |
| Metronidazole                |         |            |        |              |                                  |                                                                                                                                                                                           |                       |              |              |         |             |         |
| Silva et al. (2011)          | Brazil  | Government | Single | Parallel     | Generalised ChP                  | ≥ 6 teeth with at least one site each with PD and CAL ≥5 mm<br>≥ 30% of the sites with PD and CAL≥4 mm and BOP                                                                            | 48.9 ± 6.1            |              | 41.2 ± 9.6   |         | 8/9         | 7/10    |

| Author (Year)              | Country  | Funding    | Centre | Trial design | Population                | Criteria                                                                                                                                                                                                   | Age mean ± SD (range) |            | Gender (M/F) |         | Smokers (%) |         |
|----------------------------|----------|------------|--------|--------------|---------------------------|------------------------------------------------------------------------------------------------------------------------------------------------------------------------------------------------------------|-----------------------|------------|--------------|---------|-------------|---------|
|                            |          |            |        |              |                           |                                                                                                                                                                                                            | Test                  | Control    | Test         | Control | Test        | Control |
| Xajigeorgiou et al. (2006) | Greece   | NR         | Single | Parallel     | Generalised AgP           | >30% of sites with CAL≥ 1mm                                                                                                                                                                                | 40.9 ± 4.6            | 37 ± 5.6   | 7/5          | 6/5     | 41.7        | 36.4    |
| Sigusch et al. (2001)      | Germany  | NR         | Single | Parallel     | Generalised Periodontitis | an average of 16 sites with PD >8 mm and intrabony lesions on at least 1 to 5 teeth over 2/3 of the root length                                                                                            | 32.4 (NR)             |            | 20/28        |         | NS          | NS      |
| Moxifloxacin               |          |            |        |              |                           |                                                                                                                                                                                                            |                       |            |              |         |             |         |
| Ardila et al. (2020)       | Colombia | University | Single | Parallel     | Generalised AgP           | ≥ 6 permanent teeth with at least 1 site each with PD and CAL ≥5 mm<br>≥ 6 teeth (exclude 1st molars and incisors) with at least 1 site each with PD and CAL ≥5 mm                                         | 25.7 ± 4.3            | 27.1± 2.9  | 4/8          | 4/8     | NS          | NS      |
| Ardila et al. (2015)       | Colombia | University | Single | Parallel     | Generalised AgP           | ≥ 1 site each with PD and CAL ≥5 mm<br>≥ 6 teeth (exclude 1st molars and incisors) with at least 1 site each with PD and CAL ≥5 mm                                                                         | 28.4 ± 0.9            | 26.4 ± 1.1 | 9/11         | 8/12    | NS          | NS      |
| Minocycline HCl            |          |            |        |              |                           |                                                                                                                                                                                                            |                       |            |              |         |             |         |
| Basegmez et al. (2011)     | Turkey   | NR         | Single | Parallel     | ChP                       | ≥ 16 interproximal sites with PD ≥4 mm                                                                                                                                                                     | 39.8 ± 5.84           | 42.1 ± 9   | 20/20        |         | NS          | NS      |
| Satranidazole              |          |            |        |              |                           |                                                                                                                                                                                                            |                       |            |              |         |             |         |
| Pradeep et al. (2013)      | India    | Commercial | Single | Parallel     | ChP                       | PD ≥ 5mm and/or CAL ≥ 4mm                                                                                                                                                                                  | (30 – 50)             |            | 33/27        |         | NS          | NS      |
| Secnidazole                |          |            |        |              |                           |                                                                                                                                                                                                            |                       |            |              |         |             |         |
| Li et al. (2017)           | China    | NR         | Single | Parallel     | ChP                       | ≥ 6 teeth including incisors and/or first molars with at least 1 site each with PPD and CAL ≥ 5 mm<br>≥ 6 teeth (exclude than first molars and incisors) with at least 1 site each with PPD and CAL ≥ 5 mm | 52                    |            | NR           |         | NR          |         |

AgP: Aggressive Periodontitis; ChP: Chronic Periodontitis; NS: Non-smoker's study; NR: Not reported

\*Include more than 1 arm of AMX+MET with different dosages



**Table S4.** Intervention characteristics of included studies according to provided adjuncts

| Author (Year)               | Delivery of NSPT |      |                |                               | Test group                      |                           | Control   | Provider                 |
|-----------------------------|------------------|------|----------------|-------------------------------|---------------------------------|---------------------------|-----------|--------------------------|
|                             | OHI              | SRP  | No. of Session | Duration for Completion       | Dosage                          | Antibiotic initiation     |           |                          |
| Amoxycillin + Metronidazole |                  |      |                |                               |                                 |                           |           |                          |
| Ardila et al. (2020)        | Yes              | OSFM | 1              | NI                            | 500 mg + 500 mg tds for 7 days  | Before SRP                | Placebo   | Clinician                |
| Liaw et al. (2019)          | Yes              | HM   | 2              | 7 days<br>(90 mins each)      | 500 mg + 400 mg tds for 14 days | After 1 <sup>st</sup> SRP | SRP alone | Clinician                |
| Borges et al. (2017)        | Yes              | FM   | NI             | 2 weeks                       | 500 mg + 250 mg tds for 7 days  | After SRP                 | Placebo   | Periodontists            |
|                             |                  |      |                |                               | 500 mg + 250 mg tds for 14 days |                           |           |                          |
|                             |                  |      |                |                               | 500 mg + 400 mg tds for 7 days  |                           |           |                          |
|                             |                  |      |                |                               | 500 mg + 400 mg tds for 14 days |                           |           |                          |
| Dukić et al. (2016)         | NI               | NI   | NI             | NI                            | 500 mg + 400 mg tds for 7 days  | After SRP                 | SRP alone | NI                       |
| Saleh et al. (2016)         | Yes              | FM   | 2 – 4          | NI                            | 500 mg + 200 mg tds for 7 days  | NI                        | Placebo   | Clinician                |
| Taiete et al. (2016)        | Yes              | NI   | NI             | NI                            | 375 mg + 250 mg tds for 7 days  | After SRP                 | Placebo   | NI                       |
| Harks et al. (2015)         | Yes              | FM   | 2              | NI                            | 500 mg + 400 mg tds for 7 days  | After SRP                 | Placebo   | Dentist/Dental hygienist |
| Silva et al. (2011)         | Yes              | FM   | 4 – 6          | 19 – 21 days<br>(1 hour each) | 500 mg + 400 mg tds for 14 days | After 1 <sup>st</sup> SRP | Placebo   | Periodontists            |
| Buchmann et al. (2010)      | NI               | NI   | NI             | NI                            | 500 mg + 250 mg tds for 7 days  | NI                        | Placebo   | Clinician                |
| Ribeiro et al. (2009)       | Yes              | OSFM | 1              | 45 mins                       | 375 mg + 250 mg tds for 7 days  | After SRP                 | Placebo   | Clinician                |
| Moeintaghavi et al. (2007)  | Yes              | OSFM | 1              | 1 hour                        | 500 mg + 250 mg tds for 7 days  | After SRP                 | Placebo   | NI                       |
| Xajigeorgiou et al. (2006)  | Yes              | FM   | 4              | NI                            | 500 mg + 500 mg tds for 7 days  | After SRP                 | SRP alone | NI                       |
| Winkel et al. (2001)        | Yes              | FM   | 3 – 6          | NI (1 hour each)              | 375 mg + 250 mg tds for 7 days  | After SRP                 | Placebo   | NI                       |

| Author (Year)                | Delivery of NSPT |                     |                |                                 | Test group                        |                           | Control    | Provider          |
|------------------------------|------------------|---------------------|----------------|---------------------------------|-----------------------------------|---------------------------|------------|-------------------|
|                              | OHI              | SRP                 | No. of Session | Duration for Completion         | Dosage                            | Antibiotic initiation     |            |                   |
| Azithromycin                 |                  |                     |                |                                 |                                   |                           |            |                   |
| Morales et al. (2021)        | Yes              | QSRP                | 4 – 6          | NI                              | 500 mg qid for 5 days             | After SRP                 | Placebo    | Clinician         |
| Povšič et al. (2021)         | Yes              | FM                  | 2              | 7 days<br>(1.5 hours each)      | 500 mg od for 3 days              | After SRP                 | Placebo    | Clinician         |
| Čuk et al. (2020)            | Yes              | Sites with PD ≥5 mm | 2              | 1.5 hours per session           | 500 mg od for 3 days              | After SRP                 | Placebo    | Clinician         |
| Liaw et al. (2019)           | Yes              | HM                  | 2              | 7 days<br>(90 mins each)        | 500 mg od for 3 days              | After 1 <sup>st</sup> SRP | SRP alone  | Clinician         |
| Saleh et al. (2016)          | Yes              | FM                  | 2 – 4          | NI                              | 500 mg od for 3 days              | NI                        | Placebo    | Clinician         |
| Fonseca et al. (2015)        | NI               | FM                  | 2              | 24 hours<br>(60 mins each)      | 500 mg od for 3 days              | After 1 <sup>st</sup> SRP | SRP alone  | Periodontists     |
|                              | NI               | QSRP                | 4              | 30 mins each in weekly interval | 500 mg od for 3 days              | After 1 <sup>st</sup> SRP | QSRP alone | Periodontists     |
| Emingil et al. (2012)        | Yes              | QSRP                | 4              | NI                              | 500 mg od for 3 days              | After SRP                 | Placebo    | NI                |
| Han et al. (2012)            | Yes              | QSRP                | 4              | NI                              | 500 mg od for 3 days              | After SRP                 | Placebo    | Clinician         |
| Sampaio et al. (2011)        | Yes              | FM                  | 4 – 6          | 2 weeks<br>(2 hours each)       | 500 mg od for 5 days              | After SRP                 | Placebo    | Periodontists     |
| Haas et al. (2008)           | Yes              | QSRP/SSRP           | 4 – 6          | 14 days                         | 500 mg od for 3 days              | Before SRP                | Placebo    | Clinician         |
| Gomi et al. (2007)           | Yes              | OSFM                | 1              | 90 mins                         | 500 mg od for 3 days              | Before SRP                | SRP alone  | Clinician         |
| Cefixime                     |                  |                     |                |                                 |                                   |                           |            |                   |
| Dukić et al. (2016)          | NI               | NI                  | NI             | NI                              | 400 mg od for 7 days              | After SRP                 | SRP alone  | NI                |
| Clarithromycin               |                  |                     |                |                                 |                                   |                           |            |                   |
| Bechara Andere et al. (2018) | Yes              | OSFM                | 1              | NI                              | 500 mg bd for 3 days              | After SRP                 | SRP alone  | Clinician         |
| Suryaprasanna et al. (2018)  | NI               | NI                  | NI             | NI                              | 500 mg tds for 7 days             | Along with SRP            | SRP alone  | NI                |
| Andere et al. (2017)         | Yes              | OSFM                | 1              | ≤1 hour                         | 500 mg bd for 3 days              | Before SRP                | Placebo    | Clinician         |
| Clindamycin                  |                  |                     |                |                                 |                                   |                           |            |                   |
| Sigusch et al. (2001)        | Yes              | FM                  | 1 – 2          | 2 days<br>(2 hours each)        | 150 mg qid for 8 days             | After SRP                 | SRP alone  | Dental hygienists |
| Doxycycline                  |                  |                     |                |                                 |                                   |                           |            |                   |
| Xajigeorgiou et al. (2006)   | Yes              | FM                  | 4              | NI                              | 200 mg then 100 mg od for 14 days | After SRP                 | SRP alone  | NI                |
| Sigusch et al. (2001)        | Yes              | FM                  | 1 – 2          | 2 days<br>(2 hours each)        | 200 mg od for 8 days              | After SRP                 | SRP alone  | Dental hygienists |

| Author (Year)              | Delivery of NSPT |      |                |                               | Test group             |                           | Control   | Provider          |
|----------------------------|------------------|------|----------------|-------------------------------|------------------------|---------------------------|-----------|-------------------|
|                            | OHI              | SRP  | No. of Session | Duration for Completion       | Dosage                 | Antibiotic initiation     |           |                   |
| Metronidazole              |                  |      |                |                               |                        |                           |           |                   |
| Silva et al. (2011)        | Yes              | FM   | 4 – 6          | 19 – 21 days<br>(1 hour each) | 400 mg tds for 14 days | After 1 <sup>st</sup> SRP | Placebo   | Periodontists     |
| Xajigeorgiou et al. (2006) | Yes              | FM   | 4              | NI                            | 500 mg tds for 7 days  | After SRP                 | SRP alone | NI                |
| Sigusch et al. (2001)      | Yes              | FM   | 1 – 2          | 2 days<br>(2 hours each)      | 500 mg bd for 8 days   | After SRP                 | SRP alone | Dental hygienists |
| Moxifloxacin               |                  |      |                |                               |                        |                           |           |                   |
| Ardila et al. (2020)       | Yes              | OSFM | 1              | NI                            | 400 mg qid for 7 days  | Before SRP                | Placebo   | Clinician         |
| Ardila et al. (2015)       | Yes              | OSFM | 1              | 2.5 hours                     | 400 mg od for 7 days   | Before SRP                | Placebo   | Clinician         |
| Satranidazole              |                  |      |                |                               |                        |                           |           |                   |
| Pradeep et al. (2013)      | Yes              | NI   | NI             | NI                            | 300 mg bd for 10 days  | After SRP                 | Placebo   | NI                |
| Secnidazole                |                  |      |                |                               |                        |                           |           |                   |
| Li et al. (2017)           | NI               | FM   | NI             | NI                            | 1 g od for 30 days     | 48 hours after SRP        | Placebo   | NI                |

FM: Full mouth; HM: Half-mouth; NI: No information; OSFM: One-staged full mouth; QSRP: Per-quadrant Scaling & Root Planing; SSRP: Per-sextant Scaling & Root Planing

**Table S5.** Reported outcomes and the outcome measurements of included studies

| Author (Year)                | No. of Examiners | Calibration | Blinding | Probing type | Use of stent | Reported outcome of interest and outcomes measurement |                                           |                                            |                  |
|------------------------------|------------------|-------------|----------|--------------|--------------|-------------------------------------------------------|-------------------------------------------|--------------------------------------------|------------------|
|                              |                  |             |          |              |              | CAL                                                   | PPD                                       | BOP                                        | AE               |
| Morales et al. (2021)        | 1                | NI          | Yes      | Manual       | No           | 6 sites per tooth                                     | 6 sites per tooth                         | NI                                         | Self-report      |
| Povšič et al. (2021)         | 1                | Yes         | Yes      | Manual       | No           | 6 sites per tooth, PD + REC                           | 6 sites per tooth                         | Absence/presence of bleeding after probing | Self-report      |
| Ardila et al. (2020)         | 1                | Yes         | Yes      | Manual       | No           | 6 sites per tooth                                     | 6 sites per tooth                         | NI                                         | Self-report form |
| Čuk et al. (2020)            | 1                | NR          | Yes      | Manual       | No           | 6 sites per tooth, PD + REC                           | 6 sites per tooth                         | NI                                         | Self-report      |
| Liaw et al. (2019)           | 1                | Yes         | Yes      | Manual       | No           | 6 sites per tooth, Bottom of pocket to CEJ            | 6 sites per tooth                         | NI                                         | Self-report      |
| Bechara Andere et al. (2018) | 1                | Yes         | Yes      | Manual       | No           | 6 sites per tooth, Bottom of pocket to CEJ            | 6 sites per tooth, Bottom of pocket to GM | NI                                         | NI               |

| Author (Year)               | No. of Examiners | Calibration | Blinding | Probing type                           | Use of stent | Reported outcome of interest and outcomes measurement                                     |                                                                          |                                            |                                 |
|-----------------------------|------------------|-------------|----------|----------------------------------------|--------------|-------------------------------------------------------------------------------------------|--------------------------------------------------------------------------|--------------------------------------------|---------------------------------|
|                             |                  |             |          |                                        |              | CAL                                                                                       | PPD                                                                      | BOP                                        | AE                              |
| Suryaprasanna et al. (2018) | NI               | NI          | Yes      | Manual                                 | No           | NI                                                                                        | NI                                                                       | NR                                         | NR                              |
| Andere et al. (2017)        | 1                | Yes         | Yes      | Manual                                 | No           | 6 sites per tooth, Bottom of pocket to CEJ                                                | 6 sites per tooth, Bottom of pocket to GM                                | NI                                         | Self-report form                |
| Borges et al. (2017)        | 1                | Yes         | Yes      | Manual                                 | No           | 6 sites per tooth                                                                         | 6 sites per tooth                                                        | NI                                         | Self-report form                |
| Li et al. (2017)            | 1                | NI          | NI       | Manual                                 | No           | 6 sites per tooth, from CEJ to the bottom of the gingival sulcus                          | 4 sites per tooth, bottom of the periodontal pocket to the gingival line | NR                                         | NR                              |
| Dukić et al. (2016)         | NI               | NI          | NI       | Manual                                 | No           | Routine method (unclear)                                                                  | Routine method (unclear)                                                 | Mühlemann & Son (1971)                     | Self-report                     |
| Sampaio et al. (2016)       | 2                | Yes         | Yes      | Manual                                 | No           | 6 sites per tooth, Bottom of pocket to CEJ                                                | 6 sites per tooth, Bottom of pocket to GM                                | Absence/presence of bleeding after probing | Self-administered questionnaire |
| Taiete et al. (2016)        | 1                | Yes         | Yes      | Manual                                 | Yes          | bottom of the pocket to the stent margin                                                  | bottom of pocket to the GM                                               | NR                                         | Self-administered questionnaire |
| Ardila et al. (2015)        | 1                | Yes         | Yes      | Manual                                 | No           | 6 sites per tooth, PD + (CEJ to GM)                                                       | 6 sites per tooth                                                        | NI                                         | Self-perceived questionnaire    |
| Fonseca et al. (2015)       | 2                | Yes         | Yes      | Manual                                 | No           | 4 sites per tooth                                                                         | 4 sites per tooth                                                        | NR                                         | NR                              |
| Harks et al. (2015)         | >1 (NI)          | NI          | Yes      | Manual & Electronic pressure-sensitive | No           | 6 sites per tooth, distance from occlusal surface to the bottom of the periodontal pocket | 6 sites per tooth                                                        | NR                                         | Self-report                     |
| Pradeep et al. (2013)       | 1                | Yes         | Yes      | Manual                                 | No           | 6 sites per tooth, CEJ to deepest probable point                                          | 6 sites per tooth, GM to bottom of pocket                                | NR                                         | Self-report                     |
| Emingil et al. (2012)       | 1                | Yes         | Yes      | Manual                                 | No           | 6 sites per tooth, bottom of pocket to CEJ or anatomical landmark if CEJ not visible      | 6 sites per tooth                                                        | NI                                         | Self-report                     |
| Han et al. (2012)           | 1                | Yes         | Yes      | Manual                                 | No           | 6 sites per tooth, bottom of pocket to CEJ or                                             | 6 sites per tooth                                                        | NR                                         | Self-report                     |

| Author (Year)              | No. of Examiners | Calibration | Blinding | Probing type | Use of stent | Reported outcome of interest and outcomes measurement |                                           |                                            |                                 |
|----------------------------|------------------|-------------|----------|--------------|--------------|-------------------------------------------------------|-------------------------------------------|--------------------------------------------|---------------------------------|
|                            |                  |             |          |              |              | CAL                                                   | PPD                                       | BOP                                        | AE                              |
|                            |                  |             |          |              |              | anatomical landmark if CEJ not visible                |                                           |                                            |                                 |
| Basegmez et al. (2011)     | 1                | NI          | Yes      | Manual       | Yes          | NR                                                    | NR                                        | NI                                         | NR                              |
| Sigusch et al. (2011)      | 2                | No          | Yes      | Manual       | No           | 6 sites per tooth, Bottom of pocket to CEJ            | 6 sites per tooth                         | NR                                         | NR                              |
| Silva et al. (2011)        | 2                | Yes         | Yes      | Manual       | No           | 6 sites per tooth, Bottom of pocket to CEJ            | 6 sites per tooth, Bottom of pocket to GM | NI                                         | Self-perceived questionnaire    |
| Buchmann et al. (2010)     | 1                | Yes         | Yes      | NI           | No           | 6 sites per tooth                                     | 6 sites per tooth                         | NI                                         | NR                              |
| Ribeiro et al. (2009)      | 1                | Yes         | Yes      | Manual       | Yes          | 6 sites per tooth, from stent to bottom of pocket     | 6 sites per tooth, from stent to GM       | Absence/presence of bleeding after probing | Self-administered questionnaire |
| Saleh et al. (2009)        | 1                | Yes         | Yes      | Manual       | No           | 6 sites per tooth                                     | 6 sites per tooth                         | Absence/presence of bleeding after probing | NI                              |
| Xajigeorgiou et al. (2006) | 1                | NI          | Yes      | Manual       | No           | 6 sites per tooth                                     | 6 sites per tooth                         | NR                                         | Self-report                     |
| Haas et al. (2008)         | 1                | Yes         | Yes      | Manual       | No           | 6 sites per tooth, PD + REC                           | 6 sites per tooth                         | present/absent after PPD measurements      | Self-report                     |
| Gomi et al. (2007)         | NI               | NI          | NI       | NI           | NI           | NI                                                    | NI                                        | NI                                         | NI                              |
| Moeintaghavi et al. (2007) | NI               | NI          | Yes      | Manual       | No           | 4 sites per tooth, bottom of pocket to CEJ            | 4 sites per tooth                         | Presence/absent 30 seconds after probing   | Self-report                     |
| Winkel et al. (2001)       | 2                | NI          | NI       | Manual       | No           | 6 sites per tooth, Bottom of pocket to CEJ            | 6 sites per tooth                         | NR                                         | NI                              |

AE: Adverse events; BOP: Bleeding on probing; CAL: Clinical attachment level; CEJ: cemento-enamel junction; GM: Gingival margin; PPD: Probable pocket depth; NI: No information; NR: Not reported; REC: gingival recession

**Table S6.** Summary of CAL outcome reported in included studies

| Dosage                      | Author (Year)              | Follow-up  | Intervention         |                      |                       |                      | Control              |                      |                       |                      | Notes                                   |
|-----------------------------|----------------------------|------------|----------------------|----------------------|-----------------------|----------------------|----------------------|----------------------|-----------------------|----------------------|-----------------------------------------|
|                             |                            |            | Sample size (BL/End) | Baseline (Mean ± SD) | Follow-up (Mean ± SD) | CAL gain (Mean ± SD) | Sample size (BL/End) | Baseline (Mean ± SD) | Follow-up (Mean ± SD) | CAL gain (Mean ± SD) |                                         |
| Amoxycillin + Metronidazole |                            |            |                      |                      |                       |                      |                      |                      |                       |                      |                                         |
| 500mg + 500mg tds 7 days    | Xajigeorgiou et al. (2006) | 6 weeks    | 12/10                | 4.97 ± 1.01          | 4.31 ± 0.92           | 0.66 ± 0.43          | 12/11                | 4.55 ± 0.72          | 3.80 ± 0.62           | 0.75 ± 0.29          | MD ± SD not reported, PP                |
|                             | Ardila et al. (2020)       | 3 mths.    | 12/11                | 4.75 ± 0.80          | 3.27 ± 0.40           | 1.48 ± 0.26          | 12/11                | 4.74 ± 0.70          | 4.02 ± 0.20           | 0.72 ± 0.21          | MD ± SD not reported, ITT               |
|                             | Ardila et al. (2020)       | 6 mths.    | 12/11                | 4.75 ± 0.80          | 3.09 ± 0.30           | 1.66 ± 0.25          | 12/11                | 4.74 ± 0.70          | 3.99 ± 0.30           | 0.75 ± 0.23          |                                         |
|                             | Xajigeorgiou et al. (2006) |            | 12/10                | 4.97 ± 1.01          | 4.05 ± 1.34           | 0.92 ± 0.53          | 12/11                | 4.55 ± 0.72          | 4.07 ± 0.59           | 0.48 ± 0.28          | MD ± SD not reported, PP                |
| 500mg + 400mg tds 7 days    | Dukić et al. (2016)        | 7 days     | 30/30                | 3.58 ± 1.13          | 3.20 ± 1.01           | 0.38 ± 0.28          | 30/30                | 3.61 ± 0.92          | 3.39 ± 1.17           | 0.22 ± 0.27          | MD ± SD not reported, ITT               |
|                             | Borges et al. (2017)       | 3 mths.    | 22/20                | 4.70 ± 1.30          | 4.20 ± 1.30           | 0.20 ± 0.32          | 22/19                | 4.40 ± 1.00          | 4.10 ± 1.10           | 0.30 ± 0.34          |                                         |
|                             |                            | 6 mths.    | 22/20                | 4.70 ± 1.30          | 4.10 ± 1.40           | 0.30 ± 0.30          | 22/19                | 4.40 ± 1.00          | 4.20 ± 1.10           | 0.20 ± 0.34          |                                         |
|                             |                            | 12 mths.   | 22/20                | 4.70 ± 1.30          | 4.00 ± 1.40           | 0.70 ± 0.41          | 22/19                | 4.40 ± 1.00          | 4.10 ± 1.00           | 0.30 ± 0.32          |                                         |
| 500mg + 250mg tds 7 days    | Borges et al. (2017)       | 3 mths.    | 22/21                | 4.50 ± 0.90          | 3.90 ± 1.00           | 0.60 ± 0.29          | 22/19                | 4.40 ± 1.00          | 4.10 ± 1.10           | 0.30 ± 0.34          | MD ± SD not reported, ITT               |
|                             |                            | 6 mths.    | 22/21                | 4.50 ± 0.90          | 3.90 ± 1.00           | 0.60 ± 0.29          | 22/19                | 4.40 ± 1.00          | 4.20 ± 1.10           | 0.20 ± 0.34          |                                         |
|                             |                            | 12 mths.   | 22/21                | 4.50 ± 0.90          | 3.70 ± 1.30           | 0.80 ± 0.34          | 22/19                | 4.40 ± 1.00          | 4.10 ± 1.00           | 0.30 ± 0.32          |                                         |
|                             | Harks et al. (2015)        | 27.5 mths. | 251/170              | 4.10 ± 0.90          | 3.40 ± 0.90           | 0.70 ± 0.09          | 255/175              | 4.10 ± 1.00          | 3.70 ± 1.00           | 0.40 ± 0.11          | MD ± SD not reported, RAL, ITT          |
| 500mg + 200mg tds 7 days    | Buchmann et al. (2010)     | 3 weeks    | 36/36                | 6.70 ± 1.50          | 4.60 ± 1.20           | 2.10 ± 0.70          | 32/32                | 5.90 ± 1.00          | 4.60 ± 0.90           | 1.30 ± 0.50          |                                         |
|                             | Saleh et al. (2016)        | 3 mths.    | 13/11                | 4.51 ± 0.82          | 3.97 ± 0.82           | 0.55 ± 0.65          | 12/10                | 4.38 ± 0.61          | 4.08 ± 0.69           | 0.3 ± 0.35           | PP                                      |
| 500mg + 400mg tds 14 days   | Liaw et al. (2019)         | 2 mths.    | 13/12                | 4.21 ± 1.10          | 3.67 ± 1.51           | 0.54 ± 0.53          | 13/11                | 5.01 ± 1.19          | 4.35 ± 0.68           | 0.66 ± 0.39          | Median (IQR) converted to mean (SD), PP |
|                             | Borges et al. (2017)       | 3 mths.    | 22/20                | 4.80 ± 1.20          | 4.10 ± 1.10           | 0.70 ± 0.35          | 22/19                | 4.40 ± 1.00          | 4.10 ± 1.10           | 0.30 ± 0.32          | MD ± SD not reported, ITT               |

| Dosage                    | Author (Year)         | Follow-up | Intervention         |                      |                       |                      | Control              |                      |                       |                      | Notes                                   |
|---------------------------|-----------------------|-----------|----------------------|----------------------|-----------------------|----------------------|----------------------|----------------------|-----------------------|----------------------|-----------------------------------------|
|                           |                       |           | Sample size (BL/End) | Baseline (Mean ± SD) | Follow-up (Mean ± SD) | CAL gain (Mean ± SD) | Sample size (BL/End) | Baseline (Mean ± SD) | Follow-up (Mean ± SD) | CAL gain (Mean ± SD) |                                         |
|                           | Silva et al. (2011)   |           | 17/17                | 4.40 ± 0.60          | 3.60 ± 0.70           | 1.37 ± 0.39          | 17/17                | 4.20 ± 0.70          | 3.70 ± 0.70           | 1.53 ± 0.27          | ITT                                     |
|                           | Borges et al. (2017)  | 6 mths.   | 22/20                | 4.80 ± 1.20          | 4.20 ± 1.20           | 0.60 ± 0.36          | 22/19                | 4.40 ± 1.00          | 4.20 ± 1.10           | 0.20 ± 0.32          | MD ± SD not reported, ITT               |
|                           |                       | 12 mths.  | 22/20                | 4.80 ± 1.20          | 4.00 ± 1.10           | 0.80 ± 0.35          | 22/19                | 4.40 ± 1.00          | 4.10 ± 1.00           | 0.30 ± 0.30          |                                         |
| 500mg + 250mg tds 14 days | Borges et al. (2017)  | 3 mths.   | 22/20                | 4.20 ± 0.80          | 3.50 ± 0.80           | 0.70 ± 0.24          | 22/19                | 4.40 ± 1.00          | 4.10 ± 1.10           | 0.30 ± 0.32          | MD ± SD not reported, ITT               |
|                           |                       | 6 mths.   | 22/20                | 4.20 ± 0.80          | 3.50 ± 0.80           | 0.70 ± 0.24          | 22/19                | 4.40 ± 1.00          | 4.20 ± 1.10           | 0.20 ± 0.32          |                                         |
|                           |                       | 12 mths.  | 22/20                | 4.20 ± 0.80          | 3.40 ± 0.70           | 0.80 ± 0.23          | 22/19                | 4.40 ± 1.00          | 4.10 ± 1.00           | 0.30 ± 0.30          |                                         |
| 375mg + 250mg tds 7 days  | Taiete et al. (2016)  | 3 mths.   | 24/21                | 8.60 ± 1.40          | 1.90 ± 0.60           | 6.70 ± 0.33          | 24/18                | 8.60 ± 1.00          | 1.40 ± 0.80           | 7.20 ± 0.30          | MD ± SD not reported, rCAL, PP          |
|                           | Ribeiro et al. (2009) | 6 mths.   | -/13                 | 8.15 ± 0.55          | 6.27 ± 3.16           | 1.88 ± 0.89          | -/12                 | 8.22 ± 1.02          | 6.54 ± 3.13           | 1.68 ± 0.95          | Follow-up not reported, RAL, PP         |
|                           | Taiete et al. (2016)  |           | 24/21                | 8.60 ± 1.40          | 1.70 ± 0.90           | 6.90 ± 0.36          | 24/18                | 8.60 ± 1.00          | 1.50 ± 0.90           | 7.10 ± 0.32          | MD ± SD not reported, rCAL, P           |
|                           | Winkel et al. (2001)  |           | -/23                 | 3.90 ± 1.10          | 3.20 ± 1.00           | 0.70 ± 0.31          | -/26                 | 4.00 ± 1.30          | 3.60 ± 1.10           | 0.40 ± 0.33          |                                         |
| Azithromycin              |                       |           |                      |                      |                       |                      |                      |                      |                       |                      |                                         |
| 500mg od 3 days           | Han et al. (2012)     | 1 mth.    | 18/14                | 5.68 ± 0.70          | 4.21 ± 0.88           | 1.47 ± 0.30          | 18/14                | 5.32 ± 1.00          | 3.96 ± 1.58           | 1.36 ± 0.50          | Follow-up not reported, PP              |
|                           | Emingil et al. (2012) |           | 18/16                | 5.82 ± 0.92          | 4.18 ± 0.73           | 1.64 ± 0.29          | 18/16                | 5.25 ± 0.60          | 3.78 ± 0.45           | 1.47 ± 0.18          | 95% CI converted to mean (SD), PP       |
|                           | Liaw et al. (2019)    | 2 mths.   | 12/11                | 4.31 ± 0.59          | 3.54 ± 0.42           | 0.77 ± 0.22          | 13/11                | 5.01 ± 1.19          | 4.35 ± 0.68           | 0.66 ± 0.41          | Median (IQR) converted to mean (SD), PP |
|                           | Emingil et al. (2012) | 3 mths.   | 18/16                | 5.82 ± 0.92          | 3.99 ± 0.66           | 1.83 ± 0.28          | 18/16                | 5.25 ± 0.60          | 3.66 ± 0.48           | 1.59 ± 0.19          | 95% CI converted to mean (SD), PP       |
|                           | Gomi et al. (2007)    |           | 17/17                | 7.47 ± 1.96          | 4.71 ± 1.12           | 2.76 ± 0.55          | 17/17                | 7.21 ± 1.37          | 5.35 ± 0.88           | 1.86 ± 0.39          | MD ± SD not reported, ITT               |
|                           | Han et al. (2012)     |           | 18/14                | 5.68 ± 0.70          | 4.10 ± 1.32           | 1.58 ± 0.40          | 18/14                | 5.32 ± 1.00          | 3.84 ± 2.01           | 1.48 ± 0.60          | Follow-up not reported, PP              |
|                           | Saleh et al. (2016)   |           | 12/11                | 3.96 ± 0.58          | 3.81 ± 0.61           | 0.15 ± 0.25          | 12/10                | 4.38 ± 0.61          | 4.08 ± 0.69           | 0.30 ± 0.35          | PP                                      |

| Dosage          | Author (Year)         | Follow-up | Intervention         |                      |                       |                      | Control              |                      |                       |                                | Notes                                                    |
|-----------------|-----------------------|-----------|----------------------|----------------------|-----------------------|----------------------|----------------------|----------------------|-----------------------|--------------------------------|----------------------------------------------------------|
|                 |                       |           | Sample size (BL/End) | Baseline (Mean ± SD) | Follow-up (Mean ± SD) | CAL gain (Mean ± SD) | Sample size (BL/End) | Baseline (Mean ± SD) | Follow-up (Mean ± SD) | CAL gain (Mean ± SD)           |                                                          |
|                 | Fonseca et al. (2015) | 6 mths.   | 15/15                | 2.73 ± 1.15          | 2.68 ± 1.14           | 0.05 ± 0.42          | 15/15                | 2.39 ± 0.99          | 2.17 ± 0.77           | 0.22 ± 0.32                    | MD ± SD not reported, FMD, PP                            |
|                 | 15/13                 |           | 2.38 ± 0.79          | 2.27 ± 0.71          | 0.11 ± 0.29           | 15/14                | 2.60 ± 1.19          | 2.46 ± 1.11          | 0.14 ± 0.43           | MD ± SD not reported, QSRP, PP |                                                          |
|                 | Čuk et al. (2020)     |           | 20/19                | 4.24 ± 0.88          | 3.23 ± 0.80           | 1.00 ± 0.48          | 20/19                | 4.24 ± 1.04          | 3.41 ± 1.36           | 0.81 ± 0.57                    | Median (IQR) converted to mean (SD), PP                  |
|                 | Emingil et al. (2012) |           | 18/16                | 5.82 ± 0.92          | 3.93 ± 0.68           | 1.89 ± 0.29          | 18/16                | 5.25 ± 0.60          | 3.61 ± 0.48           | 1.64 ± 0.19                    | 95% CI converted to mean (SD), PP                        |
|                 | Gomi et al. (2007)    |           | 17/17                | 7.47 ± 1.96          | 4.85 ± 1.05           | 2.62 ± 0.54          | 17/17                | 7.21 ± 1.37          | 5.74 ± 0.96           | 1.47 ± 0.41                    | MD ± SD not reported, ITT                                |
|                 | Han et al. (2012)     |           | 18/14                | 5.68 ± 0.70          | 4.13 ± 1.73           | 1.55 ± 0.50          | 18/14                | 5.32 ± 1.00          | 3.78 ± 1.58           | 1.54 ± 0.50                    | Follow-up not reported, PP                               |
|                 | Fonseca et al. (2015) |           | 15/15                | 2.73 ± 1.15          | 2.61 ± 1.15           | 0.12 ± 0.42          | 15/15                | 2.39 ± 0.99          | 2.20 ± 0.74           | 0.19 ± 0.32                    | MD ± SD not reported, FMD, PP                            |
|                 |                       |           | 15/13                | 2.38 ± 0.79          | 2.25 ± 0.72           | 0.13 ± 0.30          | 15/14                | 2.60 ± 1.19          | 2.41 ± 1.04           | 0.19 ± 0.42                    | MD ± SD not reported, QSRP, PP                           |
|                 | Haas et al. (2008)    | 12 mths.  | 12/12                | 5.90 ± 1.80          | 4.22 ± 1.57           | 1.68 ± 0.69          | 13/12                | 5.70 ± 1.80          | 4.73 ± 2.96           | 0.97 ± 1.00                    | Follow-up not reported, MD (SE) converted to MD (SD), PP |
|                 | Povšič et al. (2021)  |           | 20/19                | 4.24 ± 0.88          | 3.78 ± 1.52           | 0.46 ± 0.40          | 20/19                | 4.24 ± 1.04          | 3.52 ± 1.2            | 0.72 ± 0.36                    | Median (IQR) converted to mean (SD), PP                  |
| 500mg od 5 days | Morales et al. (2021) | 3 mths.   | 16/16                | 4.40 ± 0.90          | 3.80 ± 0.80           | 0.40 ± 0.30          | 15/15                | 4.70 ± 1.50          | 4.10 ± 1.40           | 0.60 ± 0.40                    | ITT                                                      |
|                 | Morales et al. (2021) | 6 mths.   | 16/16                | 4.40 ± 0.90          | 4.00 ± 1.00           | 0.40 ± 0.40          | 15/15                | 4.70 ± 1.50          | 4.20 ± 1.40           | 0.50 ± 0.40                    |                                                          |
|                 | Sampaio et al. (2011) |           | 20/19                | 5.51 ± 0.94          | 4.43 ± 0.81           | 1.05 ± 1.56          | 20/19                | 5.74 ± 0.83          | 4.70 ± 0.83           | 1.05 ± 1.54                    |                                                          |
|                 | Morales et al. (2021) | 9 mths.   | 16/16                | 4.40 ± 0.90          | 4.10 ± 1.00           | 0.30 ± 0.40          | 15/15                | 4.70 ± 1.50          | 4.30 ± 1.50           | 0.40 ± 0.40                    |                                                          |
|                 | Morales et al. (2021) | 12 mths.  | 16/16                | 4.40 ± 0.90          | 4.10 ± 1.10           | 0.30 ± 0.40          | 15/15                | 4.70 ± 1.50          | 4.40 ± 1.50           | 0.30 ± 0.40                    |                                                          |
|                 | Sampaio et al. (2011) |           | 20/19                | 5.51 ± 0.94          | 4.44 ± 0.77           | 1.02 ± 1.62          | 20/19                | 5.74 ± 0.83          | 4.69 ± 0.89           | 1.04 ± 1.65                    |                                                          |
| Cefixime        |                       |           |                      |                      |                       |                      |                      |                      |                       |                                |                                                          |
| 400mg od 7 days | Dukić et al. (2016)   | 7 days    | 30/30                | 3.54 ± 0.99          | 3.20 ± 1.12           | 0.34 ± 0.27          | 30/30                | 3.61 ± 0.92          | 3.39 ± 1.17           | 0.22 ± 0.27                    | MD ± SD not reported, ITT                                |



| Dosage                      | Author (Year)                | Follow-up | Intervention         |                      |                       |                      | Control              |                      |                       |                      | Notes                     |
|-----------------------------|------------------------------|-----------|----------------------|----------------------|-----------------------|----------------------|----------------------|----------------------|-----------------------|----------------------|---------------------------|
|                             |                              |           | Sample size (BL/End) | Baseline (Mean ± SD) | Follow-up (Mean ± SD) | CAL gain (Mean ± SD) | Sample size (BL/End) | Baseline (Mean ± SD) | Follow-up (Mean ± SD) | CAL gain (Mean ± SD) |                           |
| Clindamycin                 |                              |           |                      |                      |                       |                      |                      |                      |                       |                      |                           |
| 150mg qid 8 days            | Sigusch et al. (2001)        | 6 mths.   | 11/11                | 6.10 ± 0.96          | 4.40 ± 1.00           | 1.70 ± 0.42          | 10/10                | 6.30 ± 0.77          | 5.70 ± 0.96           | 0.60 ± 0.39          | MD ± SD not reported, ITT |
|                             |                              | 24 mths.  | 11/11                | 6.10 ± 0.96          | 4.20 ± 0.87           | 1.90 ± 0.39          | 10/10                | 6.30 ± 0.77          | 5.90 ± 0.76           | 0.40 ± 0.34          |                           |
| Clarithromycin              |                              |           |                      |                      |                       |                      |                      |                      |                       |                      |                           |
| 500mg bd 3 days             | Andere et al. (2017)         | 3 mths    | 20/20                | 3.48 ± 0.66          | 2.65 ± 0.42           | 0.83 ± 0.17          | 20/20                | 3.63 ± 0.70          | 3.00 ± 0.50           | 0.63 ± 0.19          | MD ± SD not reported, ITT |
|                             | Andere et al. (2017)         | 6 mths.   | 20/20                | 3.48 ± 0.66          | 2.71 ± 0.35           | 0.77 ± 0.40          | 20/20                | 3.63 ± 0.70          | 3.03 ± 0.55           | 0.60 ± 0.40          | ITT                       |
|                             | Bechara Andere et al. (2018) |           | 18/18                | 3.28 ± 0.69          | 2.65 ± 0.37           | 0.63 ± 0.31          | 18/18                | 3.86 ± 0.76          | 3.06 ± 0.55           | 0.80 ± 0.21          | ITT                       |
| 500mg tds 7 days            | Suryaprasanna et al. (2018)  | 3 mths.   | 15/15                | 6.25 ± 0.40          | 3.08 ± 0.66           | 3.17 ± 0.20          | 15/15                | 6.25 ± 0.32          | 3.32 ± 0.42           | 2.93 ± 0.14          | MD ± SD not reported, ITT |
|                             |                              | 6 mths.   | 15/15                | 6.25 ± 0.40          | 3.32 ± 0.42           | 2.93 ± 0.15          | 15/15                | 6.25 ± 0.32          | 3.64 ± 0.44           | 2.61 ± 0.14          |                           |
| Doxycycline                 |                              |           |                      |                      |                       |                      |                      |                      |                       |                      |                           |
| 200mg od 8 days             | Sigusch et al. (2001)        | 6 mths.   | 12/12                | 6.00 ± 1.05          | 4.80 ± 0.83           | 1.20 ± 0.39          | 10/10                | 6.30 ± 0.77          | 5.70 ± 0.96           | 0.60 ± 0.39          | MD ± SD not reported, ITT |
|                             |                              | 24 mths.  | 12/12                | 6.00 ± 1.05          | 5.10 ± 0.90           | 0.90 ± 0.40          | 10/10                | 6.30 ± 0.77          | 5.90 ± 0.76           | 0.40 ± 0.34          |                           |
| 200mg then 100mg od 14 days | Xajigeorgiou et al. (2006)   | 6 weeks   | 12/10                | 5.03 ± 1.42          | 4.43 ± 1.73           | 0.60 ± 0.71          | 12/11                | 4.55 ± 0.72          | 3.80 ± 0.62           | 0.75 ± 0.29          | MD ± SD not reported, PP  |
|                             |                              | 6 mths.   | 12/10                | 5.03 ± 1.42          | 4.22 ± 1.92           | 0.81 ± 0.76          | 12/11                | 4.55 ± 0.72          | 4.07 ± 0.59           | 0.48 ± 0.28          |                           |
| Metronidazole               |                              |           |                      |                      |                       |                      |                      |                      |                       |                      |                           |
| 500mg tds 7 days            | Xajigeorgiou et al. (2006)   | 6 weeks   | 12/12                | 5.35 ± 1.27          | 4.61 ± 1.13           | 0.74 ± 0.49          | 12/11                | 4.55 ± 0.72          | 3.80 ± 0.62           | 0.75 ± 0.29          | MD ± SD not reported, PP  |
|                             |                              | 6 mths.   | 12/12                | 5.35 ± 1.27          | 4.22 ± 1.34           | 1.13 ± 0.53          | 12/11                | 4.55 ± 0.72          | 4.07 ± 0.59           | 0.48 ± 0.28          |                           |
| 500mg bd 8 days             | Sigusch et al. (2001)        | 6 mths.   | 15/15                | 6.20 ±1.00           | 4.30 ± 0.74           | 1.90 ± 0.32          | 10/10                | 6.30 ± 0.77          | 5.70 ± 0.96           | 0.60 ± 0.39          | MD ± SD not reported, ITT |
|                             |                              | 24mths.   | 15/15                | 6.20 ± 1.00          | 4.00 ± 1.07           | 2.20 ± 0.38          | 10/10                | 6.30 ± 0.77          | 5.90 ± 0.76           | 0.40 ± 0.34          |                           |

| Dosage                      | Author (Year)          | Follow-up | Intervention         |                      |                       |                      | Control              |                      |                       |                      | Notes                                                                       |
|-----------------------------|------------------------|-----------|----------------------|----------------------|-----------------------|----------------------|----------------------|----------------------|-----------------------|----------------------|-----------------------------------------------------------------------------|
|                             |                        |           | Sample size (BL/End) | Baseline (Mean ± SD) | Follow-up (Mean ± SD) | CAL gain (Mean ± SD) | Sample size (BL/End) | Baseline (Mean ± SD) | Follow-up (Mean ± SD) | CAL gain (Mean ± SD) |                                                                             |
| 400mg tds 14 days           | Silva et al. (2011)    | 3 mths.   | 17/17                | 4.00 ± 0.70          | 3.40 ± 0.60           | 1.19 ± 0.48          | 17/17                | 4.20 ± 0.70          | 3.70 ± 0.70           | 1.53 ± 0.27          | ITT                                                                         |
| Moxifloxacin                |                        |           |                      |                      |                       |                      |                      |                      |                       |                      |                                                                             |
| 400mg od 7 days             | Ardila et al. (2015)   | 3 mths.   | 20/20                | 4.92 ± 0.50          | 3.17 ± 0.60           | 1.75 ± 0.17          | 20/20                | 4.93 ± 0.40          | 3.84 ± 0.50           | 1.09 ± 0.14          | MD ± SD not reported, ITT                                                   |
|                             |                        | 6 mths.   | 20/20                | 4.92 ± 0.50          | 3.14 ± 0.60           | 1.78 ± 0.17          | 20/20                | 4.93 ± 0.40          | 3.77 ± 0.40           | 1.16 ± 0.13          |                                                                             |
| 400mg qid 7 days            | Ardila et al. (2020)   | 3 mths.   | 12/12                | 4.82 ± 0.80          | 3.25 ± 0.30           | 1.57 ± 0.25          | 12/11                | 4.74 ± 0.70          | 4.02 ± 0.20           | 0.72 ± 0.21          |                                                                             |
|                             |                        | 6 mths.   | 12/12                | 4.82 ± 0.80          | 3.05 ± 0.20           | 1.77 ± 0.24          | 12/11                | 4.74 ± 0.70          | 3.99 ± 0.30           | 0.75 ± 0.22          |                                                                             |
| Satranidazole               |                        |           |                      |                      |                       |                      |                      |                      |                       |                      |                                                                             |
| 300mg bd 10 days            | Pradeep et al. (2013)  | 1 mth.    | 33/30                | 8.42 ± 0.72          | 6.21 ± 1.15           | 2.24 ± 1.21          | 33/30                | 8.62 ± 0.85          | 8.12 ± 0.95           | 0.51 ± 1.25          | PP                                                                          |
|                             |                        | 3 mths.   | 33/30                | 8.42 ± 0.72          | 5.67 ± 1.37           | 2.87 ± 1.66          | 33/30                | 8.62 ± 0.85          | 7.85 ± 1.29           | 0.83 ± 1.25          | PP                                                                          |
|                             |                        | 6 mths.   | 33/30                | 8.42 ± 0.72          | 5.22 ± 1.42           | 3.22 ± 1.01          | 33/30                | 8.62 ± 0.85          | 7.51 ± 1.30           | 1.15 ± 1.49          | PP                                                                          |
| Secnidazole                 |                        |           |                      |                      |                       |                      |                      |                      |                       |                      |                                                                             |
| 1g od 30 days               | Li et al. (2017)       | 3 mths.   | 25/25                | 5.20 ± 1.80          | 4.40 ± 0.90           | 0.80 ± 0.40          | 25/25                | 5.00 ± 1.70          | 4.40 ± 0.90           | 0.60 ± 0.38          | MD ± SD not reported, ITT                                                   |
| Minocycline HCl             |                        |           |                      |                      |                       |                      |                      |                      |                       |                      |                                                                             |
| 200mg then 100mg od 14 days | Basegmez et al. (2011) | 1 mth.    | 20/20                | 10.08 ± 1.33         | 9.12 ± 1.62           | 0.96 ± 0.47          | 20/20                | 8.70 ± 0.99          | 7.83 ± 1.78           | 0.87 ± 0.46          | Follow-up not reported, RAL, Median (Min – Max) converted to Mean (SD), ITT |
|                             |                        | 3 mths.   | 20/20                | 10.08 ± 1.33         | 9.10 ± 1.38           | 0.98 ± 0.43          | 20/20                | 8.70 ± 0.99          | 7.82 ± 2.15           | 0.88 ± 0.53          |                                                                             |
|                             |                        | 6 mths.   | 20/20                | 10.08 ± 1.33         | 9.12 ± 1.30           | 0.97 ± 0.42          | 20/20                | 8.70 ± 0.99          | 7.80 ± 1.53           | 0.90 ± 0.41          |                                                                             |

**Table S7.** Summary of PPD outcome reported in included studies

| Dosage                      | Author (Year)              | Follow-up  | Intervention         |                      |                       |                           | Control              |                      |                       |                           | Notes                                   |
|-----------------------------|----------------------------|------------|----------------------|----------------------|-----------------------|---------------------------|----------------------|----------------------|-----------------------|---------------------------|-----------------------------------------|
|                             |                            |            | Sample size (BL/End) | Baseline (Mean ± SD) | Follow-up (Mean ± SD) | PPD reduction (Mean ± SD) | Sample size (BL/End) | Baseline (Mean ± SD) | Follow-up (Mean ± SD) | PPD reduction (Mean ± SD) |                                         |
| Amoxycillin + Metronidazole |                            |            |                      |                      |                       |                           |                      |                      |                       |                           |                                         |
| 500mg + 500mg tds 7 days    | Xajigeorgiou et al. (2006) | 6 weeks    | 12/10                | 4.63 ± 0.97          | 3.44 ± 0.48           | 1.19 ± 0.34               | 12/11                | 4.21 ± 0.74          | 3.19 ± 0.59           | 1.02 ± 0.29               | MD ± SD not reported, PP                |
|                             | Ardila et al. (2020)       | 3 mths.    | 12/11                | 4.88 ± 0.60          | 3.11 ± 0.30           | 1.77 ± 0.19               | 12/11                | 4.80 ± 0.70          | 4.06 ± 0.20           | 0.74 ± 0.21               | MD ± SD not reported, ITT               |
|                             | Ardila et al. (2020)       | 6 mths.    | 12/11                | 4.88 ± 0.60          | 3.07 ± 0.20           | 1.81 ± 0.18               | 12/11                | 4.80 ± 0.70          | 4.02 ± 0.30           | 0.78 ± 0.22               |                                         |
|                             | Xajigeorgiou et al. (2006) |            | 12/10                | 4.63 ± 0.97          | 3.12 ± 0.71           | 1.51 ± 0.38               | 12/11                | 4.21 ± 0.74          | 3.52 ± 0.76           | 0.69 ± 0.32               | MD ± SD not reported, PP                |
| 500mg + 400mg tds 7 days    | Dukić et al. (2016)        | 7 days     | 30/30                | 4.27 ± 0.16          | 4.24 ± 0.15           | 0.03 ± 0.04               | 30/30                | 4.30 ± 0.18          | 4.30 ± 0.17           | 0 ± 0.05                  | MD ± SD not reported, ITT               |
|                             | Borges et al. (2017)       | 3 mths.    | 22/20                | 4.00 ± 0.90          | 2.80 ± 0.50           | 1.20 ± 0.22               | 22/19                | 3.80 ± 0.70          | 3.00 ± 0.60           | 0.80 ± 0.20               |                                         |
|                             |                            | 6 mths.    | 22/20                | 4.00 ± 0.90          | 2.60 ± 0.50           | 1.40 ± 0.22               | 22/19                | 3.80 ± 0.70          | 3.00 ± 0.60           | 0.80 ± 0.20               |                                         |
|                             |                            | 12 mths.   | 22/20                | 4.00 ± 0.90          | 2.60 ± 0.50           | 1.40 ± 0.22               | 22/19                | 3.80 ± 0.70          | 2.90 ± 0.60           | 0.90 ± 0.20               |                                         |
| 500mg + 400mg tds 14 days   | Liaw et al. (2019)         | 2 mths.    | 13/12                | 3.64 ± 0.50          | 2.76 ± 0.41           | 0.88 ± 0.18               | 13/11                | 3.89 ± 0.76          | 3.39 ± 0.93           | 0.50 ± 0.33               | Median (IQR) converted to mean (SD), PP |
|                             | Borges et al. (2017)       | 3 mths.    | 22/20                | 4.00 ± 0.80          | 2.70 ± 0.30           | 1.30 ± 0.18               | 22/19                | 3.80 ± 0.70          | 3.00 ± 0.60           | 0.80 ± 0.20               | MD ± SD not reported, ITT               |
|                             | 17/17                      |            | 3.80 ± 0.50          | 2.70 ± 0.50          | 1.08 ± 0.40           | 17/17                     | 3.60 ± 0.50          | 3.00 ± 0.60          | 0.63 ± 0.26           | ITT                       |                                         |
|                             | Borges et al. (2017)       | 6 mths.    | 22/20                | 4.00 ± 0.80          | 2.60 ± 0.40           | 1.40 ± 0.19               | 22/19                | 3.80 ± 0.70          | 3.00 ± 0.60           | 0.80 ± 0.20               | MD ± SD not reported, ITT               |
|                             |                            | 12 mths.   | 22/20                | 4.00 ± 0.80          | 2.50 ± 0.40           | 1.50 ± 0.19               | 22/19                | 3.80 ± 0.70          | 2.90 ± 0.60           | 0.90 ± 0.20               |                                         |
|                             | Harks et al. (2015)        | 27.5 mths. | 251/170              | 3.60 ± 0.70          | 2.40 ± 0.50           | 1.20 ± 0.05               | 255/175              | 3.50 ± 0.80          | 2.70 ± 0.70           | 0.80 ± 0.07               |                                         |
| 500mg + 250mg tds 7 days    | Borges et al. (2017)       | 3 mths.    | 22/21                | 3.80 ± 0.90          | 2.60 ± 0.40           | 1.20 ± 0.21               | 22/19                | 3.80 ± 0.70          | 3.00 ± 0.60           | 0.80 ± 0.20               |                                         |
|                             |                            | 6 mths.    | 22/21                | 3.80 ± 0.90          | 2.60 ± 0.40           | 1.20 ± 0.21               | 22/19                | 3.80 ± 0.70          | 3.00 ± 0.60           | 0.80 ± 0.20               |                                         |

| Dosage                    | Author (Year)          | Follow-up | Intervention         |                      |                       |                           | Control              |                      |                       |                           | Notes                                                   |
|---------------------------|------------------------|-----------|----------------------|----------------------|-----------------------|---------------------------|----------------------|----------------------|-----------------------|---------------------------|---------------------------------------------------------|
|                           |                        |           | Sample size (BL/End) | Baseline (Mean ± SD) | Follow-up (Mean ± SD) | PPD reduction (Mean ± SD) | Sample size (BL/End) | Baseline (Mean ± SD) | Follow-up (Mean ± SD) | PPD reduction (Mean ± SD) |                                                         |
|                           |                        | 12 mths.  | 22/21                | 3.80 ± 0.90          | 2.40 ± 0.60           | 1.40 ± 0.23               | 22/19                | 3.80 ± 0.70          | 2.90 ± 0.60           | 0.90 ± 0.20               |                                                         |
| 500mg + 250mg tds 14 days | Borges et al. (2017)   | 3 mths.   | 22/20                | 3.70 ± 0.70          | 2.50 ± 0.30           | 1.20 ± 0.16               | 22/19                | 3.80 ± 0.70          | 3.00 ± 0.60           | 0.80 ± 0.20               |                                                         |
|                           |                        | 6 mths.   | 22/20                | 3.70 ± 0.70          | 2.40 ± 0.30           | 1.30 ± 0.16               | 22/19                | 3.80 ± 0.70          | 3.00 ± 0.60           | 0.80 ± 0.20               |                                                         |
|                           |                        | 12 mths.  | 22/20                | 3.70 ± 0.70          | 2.30 ± 0.30           | 1.40 ± 0.16               | 22/19                | 3.80 ± 0.70          | 2.90 ± 0.60           | 0.90 ± 0.20               |                                                         |
| 500mg + 200mg tds 7 days  | Buchmann et al. (2010) | 3 weeks   | 36/36                | 6.00 ± 1.00          | 3.60 ± 0.70           | 2.40 ± 0.60               | 32/32                | 5.90 ± 1.00          | 3.70 ± 0.70           | 1.30 ± 0.50               |                                                         |
|                           | Saleh et al. (2016)    | 3 mths.   | 13/11                | 3.94 ± 0.70          | 3.02 ± 0.21           | 0.92 ± 0.58               | 12/10                | 3.98 ± 0.63          | 3.33 ± 0.55           | 0.65 ± 0.42               | PP                                                      |
| 375mg + 250mg tds 7 days  | Taiete et al. (2016)   | 3 mths.   | 24/21                | 6.50 ± 0.50          | 2.90 ± 0.70           | 3.60 ± 0.19               | 24/18                | 6.40 ± 0.40          | 2.20 ± 0.60           | 4.20 ± 0.17               | MD ± SD not reported, PP                                |
|                           | Ribeiro et al. (2009)  | 6 mths.   | -/13                 | 6.40 ± 0.43          | 3.12 ±1.41            | 3.28 ± 0.41               | -/12                 | 6.17 ± 0.49          | 4.49 ± 3.25           | 1.68 ± 0.95               | Follow-up not reported, PP                              |
|                           | Taiete et al. (2016)   |           | 24/21                | 6.50 ± 0.50          | 2.70 ± 0.80           | 3.80 ± 0.21               | 24/18                | 6.40 ± 0.40          | 2.10 ± 0.70           | 4.30 ± 0.19               | MD ± SD not reported, PP                                |
|                           | Winkel et al. (2001)   |           | -/23                 | 4.40 ± 0.60          | 3.00 ± 0.40           | 1.40 ± 0.15               | -/26                 | 4.40 ± 0.50          | 3.40 ± 0.50           | 1.00 ± 0.14               |                                                         |
| Azithromycin              |                        |           |                      |                      |                       |                           |                      |                      |                       |                           |                                                         |
| 500mg od 3 days           | Emingil et al. (2012)  | 1 mth.    | 18/16                | 4.43 ± 0.71          | 2.61 ± 0.36           | 1.82 ± 0.20               | 18/16                | 4.05 ± 0.49          | 2.44 ± 0.22           | 1.62 ± 0.13               | MD ± SD not reported, 95% CI converted to mean (SD), PP |
|                           | Han et al. (2012)      |           | 18/14                | 4.02 ± 0.50          | 2.46 ± 1.41           | 1.56 ± 0.40               | 18/14                | 3.84 ± 0.60          | 2.40 ± 1.77           | 1.44 ± 0.50               | Follow-up not reported, PP                              |
|                           | Liaw et al. (2019)     | 2 mths.   | 12/11                | 3.67 ± 0.34          | 2.74 ± 0.08           | 0.93 ± 0.11               | 13/11                | 3.89 ± 0.76          | 3.39 ± 0.93           | 0.50 ± 0.36               | Median (IQR) converted to mean (SD), PP                 |
|                           | Emingil et al. (2012)  | 3 mths.   | 18/16                | 4.43 ± 0.71          | 2.38 ± 0.29           | 2.05 ± 0.19               | 18/16                | 4.05 ± 0.49          | 2.36 ± 0.20           | 1.69 ± 0.13               | MD ± SD not reported, 95% CI converted to mean (SD), PP |
|                           | Gomi et al. (2007)     |           | 17/17                | 3.98 ± 1.06          | 2.21 ± 0.33           | 1.77 ± 0.27               | 17/17                | 4.05 ± 0.68          | 3.28 ± 0.41           | 0.77 ± 0.19               | MD ± SD not reported, ITT                               |
|                           | Han et al. (2012)      |           | 18/14                | 4.02 ± 0.50          | 2.23 ± 1.41           | 1.79 ± 0.40               | 18/14                | 3.84 ± 0.60          | 2.30 ± 1.37           | 1.54 ± 0.40               | Follow-up not reported, PP                              |

| Dosage               | Author (Year)         | Follow-up | Intervention         |                      |                       |                           | Control              |                      |                       |                                | Notes                                                    |
|----------------------|-----------------------|-----------|----------------------|----------------------|-----------------------|---------------------------|----------------------|----------------------|-----------------------|--------------------------------|----------------------------------------------------------|
|                      |                       |           | Sample size (BL/End) | Baseline (Mean ± SD) | Follow-up (Mean ± SD) | PPD reduction (Mean ± SD) | Sample size (BL/End) | Baseline (Mean ± SD) | Follow-up (Mean ± SD) | PPD reduction (Mean ± SD)      |                                                          |
|                      | Saleh et al. (2016)   |           | 12/11                | 3.51 ± 0.34          | 3.05 ± 0.20           | 0.45 ± 0.30               | 12/10                | 3.98 ± 0.63          | 3.33 ± 0.55           | 0.65 ± 0.42                    | PP                                                       |
|                      | Fonseca et al. (2015) |           | 15/15                | 2.20 ± 0.41          | 2.11 ± 0.41           | 0.09 ± 0.15               | 15/15                | 2.27 ± 0.60          | 2.09 ± 0.52           | 0.18 ± 0.21                    | MD ± SD not reported, FMD, PP                            |
|                      | 15/13                 |           | 2.31 ± 0.40          | 2.21 ± 0.40          | 0.10 ± 0.16           | 15/15                     | 2.20 ± 0.55          | 1.98 ± 0.54          | 0.22 ± 0.21           | MD ± SD not reported, QSRP, PP |                                                          |
|                      | Čuk et al. (2020)     | 6 mths.   | 20/19                | 4.04 ± 0.64          | 2.74 ± 0.56           | 1.30 ± 0.20               | 20/19                | 4.06 ± 0.72          | 2.97 ± 0.96           | 1.09 ± 0.28                    | Median (IQR) converted to mean (SD), PP                  |
|                      | Emingil et al. (2012) |           | 18/16                | 4.43 ± 0.71          | 2.32 ± 0.27           | 2.11 ± 0.19               | 18/16                | 4.05 ± 0.49          | 2.20 ± 0.17           | 1.85 ± 0.13                    | MD ± SD not reported, 95% CI converted to mean (SD), PP  |
|                      | Gomi et al. (2007)    |           | 17/17                | 3.98 ± 1.06          | 2.36 ± 0.76           | 1.62 ± 0.32               | 17/17                | 4.05 ± 0.68          | 3.30 ± 0.36           | 0.75 ± 0.19                    | MD ± SD not reported, ITT                                |
|                      | Han et al. (2012)     |           | 18/14                | 4.02 ± 0.50          | 2.21 ± 1.80           | 1.81 ± 0.50               | 18/14                | 3.84 ± 0.60          | 2.18 ± 1.77           | 1.66 ± 0.50                    | Follow-up not reported, PP                               |
|                      | Fonseca et al. (2015) |           | 15/15                | 2.20 ± 0.41          | 1.93 ± 0.42           | 0.27 ± 0.15               | 15/15                | 2.27 ± 0.60          | 2.08 ± 0.52           | 0.19 ± 0.21                    | MD ± SD not reported, FMD, PP                            |
|                      |                       |           | 15/13                | 2.31 ± 0.40          | 2.18 ± 0.40           | 0.13 ± 0.16               | 15/15                | 2.20 ± 0.55          | 1.93 ± 0.47           | 0.27 ± 0.19                    | MD ± SD not reported, QSRP, PP                           |
|                      | Haas et al. (2008)    | 12 mths.  | 12/12                | 6.70 ± 1.50          | 3.82 ± 2.33           | 2.88 ± 0.80               | 13/12                | 6.30 ± 1.60          | 4.45 ± 4.02           | 1.85 ± 1.25                    | Follow-up not reported, MD (SE) converted to MD (SD), PP |
| Povšič et al. (2021) | 20/19                 |           | 4.04 ± 0.64          | 2.74 ± 0.56          | 1.33 ± 0.48           | 20/19                     | 4.06 ± 0.72          | 2.77 ± 0.80          | 1.30 ± 0.48           | PP                             |                                                          |
| 500mg od 5 days      | Morales et al. (2021) | 3 mths.   | 16/16                | 2.90 ± 0.40          | 2.20 ± 0.30           | 0.70 ± 0.50               | 15/15                | 3.20 ± 0.90          | 2.40 ± 0.50           | 0.80 ± 0.50                    | ITT                                                      |
|                      | Morales et al. (2021) | 6 mths.   | 16/16                | 2.90 ± 0.40          | 2.30 ± 0.30           | 0.60 ± 0.30               | 15/15                | 3.20 ± 0.90          | 2.40 ± 0.50           | 0.80 ± 0.60                    | ITT                                                      |
|                      | Sampaio et al. (2011) |           | 20/20                | 4.82 ± 0.84          | 3.24 ± 0.41           | 1.54 ± 1.62               | 20/20                | 5.02 ± 0.66          | 3.36 ± 0.38           | 1.71 ± 1.71                    | ITT                                                      |
|                      | Morales et al. (2021) | 9 mths.   | 16/16                | 2.90 ± 0.40          | 2.30 ± 0.30           | 0.60 ± 0.30               | 15/15                | 3.20 ± 0.90          | 2.50 ± 0.60           | 0.70 ± 0.60                    | ITT                                                      |
|                      | Morales et al. (2021) | 12 mths.  | 16/16                | 2.90 ± 0.40          | 2.30 ± 0.30           | 0.60 ± 0.40               | 15/15                | 3.20 ± 0.90          | 2.40 ± 0.56           | 0.70 ± 0.50                    | ITT                                                      |
|                      | Sampaio et al. (2011) |           | 16/16                | 2.90 ± 0.40          | 2.30 ± 0.30           | 0.60 ± 0.30               | 15/15                | 3.20 ± 0.90          | 2.50 ± 0.60           | 0.70 ± 0.60                    | ITT                                                      |

| Dosage                      | Author (Year)                | Follow-up | Intervention         |                      |                       |                           | Control              |                      |                       |                           | Notes                     |
|-----------------------------|------------------------------|-----------|----------------------|----------------------|-----------------------|---------------------------|----------------------|----------------------|-----------------------|---------------------------|---------------------------|
|                             |                              |           | Sample size (BL/End) | Baseline (Mean ± SD) | Follow-up (Mean ± SD) | PPD reduction (Mean ± SD) | Sample size (BL/End) | Baseline (Mean ± SD) | Follow-up (Mean ± SD) | PPD reduction (Mean ± SD) |                           |
|                             |                              |           | 20/19                | 4.82 ± 0.84          | 3.36 ± 0.44           | 1.41 ± 1.68               | 20/19                | 5.02 ± 0.66          | 3.34 ± 0.50           | 1.77 ± 1.80               | ITT                       |
| Cefixime                    |                              |           |                      |                      |                       |                           |                      |                      |                       |                           |                           |
| 400mg od 7 days             | Dukić et al. (2016)          | 7 days    | 30/30                | 4.31 ± 0.13          | 4.27 ± 0.18           | 0.04 ± 0.04               | 30/30                | 4.30 ± 0.18          | 4.30 ± 0.17           | 0.00 ± 0.05               | MD ± SD not reported, ITT |
| Clindamycin                 |                              |           |                      |                      |                       |                           |                      |                      |                       |                           |                           |
| 150 mg qid 8 days           | Sigusch et al. (2001)        | 6 mths.   | 11/11                | 5.70 ± 1.06          | 3.50 ± 0.96           | 2.20 ± 0.43               | 10/10                | 5.90 ± 0.70          | 4.60 ± 1.00           | 1.30 ± 0.39               | MD ± SD not reported, ITT |
|                             |                              | 24 mths.  | 11/11                | 5.70 ± 1.06          | 3.40 ± 0.80           | 2.30 ± 0.40               | 10/10                | 5.90 ± 0.70          | 5.20 ± 0.77           | 0.70 ± 0.33               |                           |
| Clarithromycin              |                              |           |                      |                      |                       |                           |                      |                      |                       |                           |                           |
| 500mg bd 3 days             | Andere et al. (2017)         | 3 mths    | 20/20                | 3.34 ± 0.56          | 2.54 ± 0.34           | 0.80 ± 0.15               | 20/20                | 3.53 ± 0.60          | 2.83 ± 0.48           | 0.70 ± 0.17               | MD ± SD not reported, ITT |
|                             | Andere et al. (2017)         | 6 mths.   | 20/20                | 3.34 ± 0.56          | 2.53 ± 0.30           | 0.81 ± 0.40               | 20/20                | 3.53 ± 0.60          | 2.86 ± 0.52           | 0.67 ± 0.40               | ITT                       |
|                             | Bechara Andere et al. (2018) |           | 18/18                | 3.13 ± 0.68          | 2.47 ± 0.32           | 0.66 ± 0.26               | 18/18                | 3.76 ± 0.80          | 2.88 ± 0.52           | 0.88 ± 0.28               | ITT                       |
| 500mg tds 7 days            | Suryaprasanna et al. (2018)  | 3 mths.   | 15/15                | 5.95 ± 0.67          | 2.07 ± 0.44           | 3.88 ± 0.21               | 15/15                | 5.64 ± 0.82          | 2.80 ± 0.49           | 2.84 ± 0.25               | MD ± SD not reported, ITT |
|                             |                              | 6 mths.   | 15/15                | 5.95 ± 0.67          | 2.95 ± 0.36           | 3.00 ± 0.20               | 15/15                | 5.64 ± 0.82          | 2.91 ± 0.78           | 2.73 ± 0.29               |                           |
| Doxycycline                 |                              |           |                      |                      |                       |                           |                      |                      |                       |                           |                           |
| 200mg od 8 days             | Sigusch et al. (2001)        | 6 mths.   | 12/12                | 5.50 ± 0.62          | 3.90 ± 0.84           | 1.60 ± 0.30               | 10/10                | 5.90 ± 0.70          | 4.60 ± 1.00           | 1.30 ± 0.39               | MD ± SD not reported, ITT |
|                             |                              | 24 mths.  | 12/12                | 5.50 ± 0.62          | 4.20 ± 1.10           | 1.30 ± 0.36               | 10/10                | 5.90 ± 0.70          | 5.20 ± 0.77           | 0.70 ± 0.33               |                           |
| 200mg then 100mg od 14 days | Xajigeorgiou et al. (2006)   | 6 weeks   | 12/10                | 4.24 ± 0.57          | 3.48 ± 0.67           | 0.76 ± 0.28               | 12/11                | 4.21 ± 0.74          | 3.19 ± 0.59           | 1.02 ± 0.29               | MD ± SD not reported, PP  |
|                             |                              | 6 mths.   | 12/10                | 4.24 ± 0.57          | 3.35 ± 0.76           | 0.89 ± 0.30               | 12/11                | 4.21 ± 0.74          | 3.52 ± 0.76           | 0.69 ± 0.32               |                           |
| Metronidazole               |                              |           |                      |                      |                       |                           |                      |                      |                       |                           |                           |
| 500mg tds 7 days            | Xajigeorgiou et al. (2006)   | 6 weeks   | 12/12                | 4.71 ± 0.57          | 3.47 ± 0.51           | 1.24 ± 0.22               | 12/11                | 4.21 ± 0.74          | 3.19 ± 0.59           | 1.02 ± 0.29               | MD ± SD not reported, PP  |
|                             |                              | 6 mths.   | 12/12                | 4.71 ± 0.57          | 2.86 ± 0.65           | 1.85 ± 0.25               | 12/11                | 4.21 ± 0.74          | 3.52 ± 0.76           | 0.69 ± 0.32               |                           |

| Dosage                      | Author (Year)          | Follow-up | Intervention         |                      |                       |                           | Control              |                      |                       |                           | Notes                                                                       |
|-----------------------------|------------------------|-----------|----------------------|----------------------|-----------------------|---------------------------|----------------------|----------------------|-----------------------|---------------------------|-----------------------------------------------------------------------------|
|                             |                        |           | Sample size (BL/End) | Baseline (Mean ± SD) | Follow-up (Mean ± SD) | PPD reduction (Mean ± SD) | Sample size (BL/End) | Baseline (Mean ± SD) | Follow-up (Mean ± SD) | PPD reduction (Mean ± SD) |                                                                             |
| 500mg bd 8 days             | Sigusch et al. (2001)  | 6 mths.   | 15/15                | 5.80 ± 0.73          | 3.60 ± 0.78           | 2.20 ± 0.28               | 10/10                | 5.90 ± 0.70          | 4.60 ± 1.00           | 1.30 ± 0.39               | MD ± SD not reported, ITT                                                   |
|                             |                        | 24 mths.  | 15/15                | 5.80 ± 0.73          | 3.20 ± 0.65           | 2.60 ± 0.25               | 10/10                | 5.90 ± 0.70          | 5.20 ± 0.77           | 0.70 ± 0.33               |                                                                             |
| 400mg tds 14 days           | Silva et al. (2011)    | 3 mths.   | 17/17                | 3.60 ± 0.60          | 2.90 ± 0.50           | 0.76 ± 0.48               | 17/17                | 3.60 ± 0.50          | 3.00 ± 0.60           | 0.63 ± 0.26               | ITT                                                                         |
| Moxifloxacin                |                        |           |                      |                      |                       |                           |                      |                      |                       |                           |                                                                             |
| 400mg od 7 days             | Ardila et al. (2015)   | 3 mths.   | 20/20                | 4.27 ± 0.40          | 3.12 ± 0.60           | 1.15 ± 0.16               | 20/20                | 4.34 ± 0.50          | 3.67 ± 0.40           | 0.67 ± 0.14               | MD ± SD not reported, ITT                                                   |
|                             |                        | 6 mths.   | 20/20                | 4.76 ± 0.70          | 3.08 ± 0.10           | 1.68 ± 0.20               | 20/20                | 4.80 ± 0.70          | 4.06 ± 0.20           | 0.74 ± 0.21               |                                                                             |
| 400mg qid 7 days            | Ardila et al. (2020)   | 3 mths.   | 12/12                | 4.27 ± 0.40          | 3.08 ± 0.60           | 1.19 ± 0.16               | 12/11                | 4.34 ± 0.50          | 3.50 ± 0.40           | 0.84 ± 0.14               |                                                                             |
|                             |                        | 6 mths.   | 12/12                | 4.76 ± 0.70          | 3.02 ± 0.20           | 1.74 ± 0.21               | 12/11                | 4.80 ± 0.70          | 4.02 ± 0.30           | 0.78 ± 0.22               |                                                                             |
| Satranidazole               |                        |           |                      |                      |                       |                           |                      |                      |                       |                           |                                                                             |
| 300mg bd 10 days            | Pradeep et al. (2013)  | 1 mth.    | 33/30                | 7.91 ± 0.92          | 5.52 ± 1.07           | 2.41 ± 1.09               | 33/30                | 7.71 ± 0.98          | 6.75 ± 1.08           | 0.96 ± 1.19               | PP                                                                          |
|                             |                        | 3 mths.   | 33/30                | 7.91 ± 0.92          | 4.51 ± 1.09           | 3.55 ± 1.54               | 33/30                | 7.71 ± 0.98          | 6.13 ± 1.06           | 1.63 ± 1.55               | PP                                                                          |
|                             |                        | 6 mths.   | 33/30                | 7.91 ± 0.92          | 4.17 ± 1.12           | 3.84 ± 1.31               | 33/30                | 7.71 ± 0.98          | 6.32 ± 0.98           | 1.42 ± 1.01               | PP                                                                          |
| Secnidazole                 |                        |           |                      |                      |                       |                           |                      |                      |                       |                           |                                                                             |
| 1g od 30 days               | Li et al. (2017)       | 3 mths.   | 25/25                | 6.40 ± 1.60          | 5.40 ± 1.20           | 1.00 ± 0.40               | 25/25                | 6.10 ± 1.20          | 5.30 ± 0.80           | 0.80 ± 0.29               | MD ± SD not reported, ITT                                                   |
| Minocycline HCl             |                        |           |                      |                      |                       |                           |                      |                      |                       |                           |                                                                             |
| 200mg then 100mg od 14 days | Basegmez et al. (2011) | 1 mth.    | 20/20                | 4.84 ± 0.52          | 2.97 ± 2.12           | 1.87 ± 0.49               | 20/20                | 4.67 ± 0.49          | 2.97 ± 2.56           | 1.70 ± 0.58               | Follow-up not reported, RAL, Median (Min – Max) converted to Mean (SD), ITT |
|                             |                        | 3 mths.   | 20/20                | 4.84 ± 0.52          | 2.96 ± 1.99           | 1.88 ± 0.46               | 20/20                | 4.67 ± 0.49          | 2.99 ± 2.82           | 1.68 ± 0.64               |                                                                             |
|                             |                        | 6 mths.   | 20/20                | 4.84 ± 0.52          | 2.93 ± 2.40           | 1.91 ± 0.55               | 20/20                | 4.67 ± 0.49          | 2.96 ± 3.16           | 1.71 ± 0.72               |                                                                             |

**Table S8.** Summary of BOP outcome reported in included studies

| Dosage                      | Author (Year)            | Follow-up                  | Intervention         |                      |                       |                           | Control              |                      |                       |                           | Notes                                   |
|-----------------------------|--------------------------|----------------------------|----------------------|----------------------|-----------------------|---------------------------|----------------------|----------------------|-----------------------|---------------------------|-----------------------------------------|
|                             |                          |                            | Sample size (BL/End) | Baseline (Mean ± SD) | Follow-up (Mean ± SD) | BOP reduction (Mean ± SD) | Sample size (BL/End) | Baseline (Mean ± SD) | Follow-up (Mean ± SD) | BOP reduction (Mean ± SD) |                                         |
| Amoxycillin + Metronidazole |                          |                            |                      |                      |                       |                           |                      |                      |                       |                           |                                         |
| 500mg + 500mg tds 7 days    | Ardila et al. (2020)     | 3 mths.                    | 12/11                | 46.10 ± 3.00         | 8.10 ± 1.50           | 38.00 ± 1.01              | 12/11                | 45.50 ± 4.00         | 9.10 ± 0.80           | 36.40 ± 1.18              | MD ± SD not reported, ITT               |
|                             | Ardila et al. (2020)     | 6 mths.                    | 12/11                | 46.10 ± 3.00         | 8.00 ± 1.20           | 38.10 ± 0.97              | 12/11                | 45.50 ± 4.00         | 8.90 ± 0.50           | 36.60 ± 1.16              |                                         |
| 500mg + 400mg tds 7 days    | Borges et al. (2017)     | 3 mths.                    | 22/20                | 68.00 ± 21.20        | 31.90 ± 15.10         | 36.10 ± 5.80              | 22/19                | 67.90 ± 14.60        | 42.90 ± 17.30         | 25.00 ± 4.83              |                                         |
|                             |                          | 6 mths.                    | 22/20                | 68.00 ± 21.20        | 30.70 ± 14.30         | 37.30 ± 5.70              | 22/19                | 64.90 ± 18.50        | 39.00 ± 17.40         | 28.90 ± 4.84              |                                         |
|                             |                          | 12 mths.                   | 22/20                | 68.00 ± 21.20        | 28.60 ± 15.30         | 39.40 ± 5.83              | 22/19                | 64.90 ± 18.50        | 40.00 ± 17.40         | 27.90 ± 4.84              |                                         |
| 500mg + 400mg tds 14 days   | Liaw et al. (2019)       | 2 mths.                    | 13/12                | 38.86 ± 17.36        | 12.67 ± 9.14          | 26.19 ± 5.44              | 13/11                | 49.67 ± 13.23        | 25.35 ± 23.24         | 24.32 ± 8.06              | Median (IQR) converted to mean (SD), PP |
|                             | Borges et al. (2017)     | 3 mths.                    | 22/20                | 69.10 ± 20.50        | 28.70 ± 13.10         | 40.40 ± 5.44              | 22/19                | 67.90 ± 14.60        | 42.90 ± 17.30         | 25.00 ± 4.83              | MD ± SD not reported, ITT               |
|                             | Silva et al. (2011)      |                            | 17/17                | 72.90 ± 17.20        | 31.50 ± 25.40         | 41.40 ± 7.44              | 17/17                | 70.90 ± 22.40        | 32.80 ± 25.10         | 38.10 ± 8.16              |                                         |
|                             | Borges et al. (2017)     | 6 mths.                    | 22/20                | 69.10 ± 20.50        | 26.80 ± 9.30          | 42.30 ± 5.03              | 22/19                | 64.90 ± 18.50        | 39.00 ± 17.40         | 28.90 ± 4.84              |                                         |
|                             |                          | 12 mths.                   | 22/20                | 69.10 ± 20.50        | 25.10 ± 11.60         | 44.00 ± 5.27              | 22/19                | 64.90 ± 18.50        | 40.00 ± 17.40         | 27.90 ± 4.84              |                                         |
|                             | 500mg + 250mg tds 7 days | Moeintaghavi et al. (2007) | 2 mths.              | 28/28                | 96.00 ± 10.98         | 32.23 ± 17.82             | 63.80 ± 19.50        | 22/22                | 93.10 ± 12.48         | 38.50 ± 13.07             |                                         |
| Borges et al. (2017)        |                          | 3 mths.                    | 22/21                | 64.90 ± 18.50        | 32.50 ± 12.90         | 32.40 ± 4.92              | 22/19                | 67.90 ± 14.60        | 42.90 ± 17.30         | 25.00 ± 4.83              |                                         |
|                             |                          | 6 mths.                    | 22/21                | 64.90 ± 18.50        | 27.10 ± 10.30         | 37.80 ± 4.62              | 22/19                | 64.90 ± 18.50        | 39.00 ± 17.40         | 28.90 ± 4.84              |                                         |
|                             |                          | 12 mths.                   | 22/21                | 64.90 ± 18.50        | 24.00 ± 12.90         | 40.90 ± 4.92              | 22/19                | 64.90 ± 18.50        | 40.00 ± 17.40         | 27.90 ± 4.84              |                                         |
| 500mg + 250mg tds 14 days   | Borges et al. (2017)     | 3 mths.                    | 22/20                | 62.80 ± 18.90        | 24.30 ± 14.10         | 38.50 ± 5.27              | 22/19                | 67.90 ± 14.60        | 42.90 ± 17.30         | 25.00 ± 4.83              |                                         |
|                             |                          | 6 mths.                    | 22/20                | 62.80 ± 18.90        | 23.10 ± 13.00         | 39.70 ± 5.13              | 22/19                | 64.90 ± 18.50        | 39.00 ± 17.40         | 28.90 ± 4.84              |                                         |



| Dosage                   | Author (Year)         | Follow-up | Intervention         |                          |                           |                               | Control              |                          |                           |                               | Notes                                   |
|--------------------------|-----------------------|-----------|----------------------|--------------------------|---------------------------|-------------------------------|----------------------|--------------------------|---------------------------|-------------------------------|-----------------------------------------|
|                          |                       |           | Sample size (BL/End) | Baseline (Mean $\pm$ SD) | Follow-up (Mean $\pm$ SD) | BOP reduction (Mean $\pm$ SD) | Sample size (BL/End) | Baseline (Mean $\pm$ SD) | Follow-up (Mean $\pm$ SD) | BOP reduction (Mean $\pm$ SD) |                                         |
|                          |                       | 12 mths.  | 22/20                | 62.80 $\pm$ 18.90        | 18.50 $\pm$ 12.70         | 44.30 $\pm$ 5.09              | 22/19                | 64.90 $\pm$ 18.50        | 40.00 $\pm$ 17.40         | 27.90 $\pm$ 4.84              |                                         |
| 500mg + 200mg tds 7 days | Saleh et al. (2016)   | 3 mths.   | 13/11                | 55.50 $\pm$ 19.80        | 16.20 $\pm$ 10.30         | 39.30 $\pm$ 20.10             | 12/10                | 52.20 $\pm$ 12.70        | 19.50 $\pm$ 10.10         | 32.60 $\pm$ 12.50             | PP                                      |
| <b>Azithromycin</b>      |                       |           |                      |                          |                           |                               |                      |                          |                           |                               |                                         |
| 500mg od 3 days          | Han et al. (2012)     |           | 18/14                | 70.77 $\pm$ 25.70        | 20.86 $\pm$ 31.41         | 51.36 $\pm$ 20.70             | 18/14                | 65.23 $\pm$ 18.50        | 18.16 $\pm$ 60.08         | 47.07 $\pm$ 16.80             | Follow-up not reported, PP              |
|                          | Liaw et al. (2019)    | 2 mths.   | 12/11                | 37.53 $\pm$ 21.29        | 14.13 $\pm$ 5.85          | 23.40 $\pm$ 6.66              | 13/11                | 49.67 $\pm$ 13.23        | 25.35 $\pm$ 23.24         | 24.32 $\pm$ 7.42              | Median (IQR) converted to mean (SD), PP |
|                          | Emingil et al. (2012) | 3 mths.   | 18/16                | 74.75 $\pm$ 16.48        | 18.22 $\pm$ 7.08          | 56.53 $\pm$ 4.48              | 18/16                | 72.47 $\pm$ 13.45        | 21.19 $\pm$ 8.66          | 51.28 $\pm$ 3.77              | 95% CI converted to mean (SD), PP       |
|                          | Gomi et al. (2007)    |           | 17/17                | 31.42 $\pm$ 17.15        | 4.46 $\pm$ 3.27           | 26.96 $\pm$ 4.23              | 17/17                | 31.43 $\pm$ 18.46        | 12.08 $\pm$ 7.15          | 19.35 $\pm$ 4.80              | MD $\pm$ SD not reported, ITT           |
|                          | Han et al. (2012)     |           | 18/14                | 70.77 $\pm$ 25.70        | 19.41 $\pm$ 73.06         | 53.43 $\pm$ 20.30             | 18/14                | 65.23 $\pm$ 18.50        | 17.23 $\pm$ 66.70         | 48.00 $\pm$ 18.50             | Follow-up not reported, PP              |
|                          | Saleh et al. (2016)   |           | 12/11                | 42.30 $\pm$ 19.90        | 13.90 $\pm$ 6.00          | 28.40 $\pm$ 10.60             | 12/10                | 52.20 $\pm$ 12.70        | 19.50 $\pm$ 10.10         | 32.60 $\pm$ 12.50             | PP                                      |
|                          | Čuk et al. (2020)     | 6 mths.   | 20/19                | 70.00 $\pm$ 32.04        | 16.40 $\pm$ 8.01          | 53.60 $\pm$ 7.58              | 20/19                | 76.40 $\pm$ 24.03        | 23.60 $\pm$ 24.03         | 52.80 $\pm$ 7.58              | Median (IQR) converted to mean (SD), PP |
|                          | Emingil et al. (2012) |           | 18/16                | 74.75 $\pm$ 16.48        | 17.89 $\pm$ 6.98          | 56.86 $\pm$ 4.47              | 18/16                | 72.47 $\pm$ 13.45        | 18.97 $\pm$ 6.31          | 53.50 $\pm$ 3.50              | 95% CI converted to mean (SD), PP       |
|                          | Gomi et al. (2007)    |           | 17/17                | 31.42 $\pm$ 17.15        | 5.35 $\pm$ 2.91           | 26.07 $\pm$ 4.22              | 17/17                | 31.43 $\pm$ 18.46        | 12.91 $\pm$ 7.62          | 18.52 $\pm$ 4.84              | MD $\pm$ SD not reported, ITT           |
|                          | Han et al. (2012)     |           | 18/14                | 70.77 $\pm$ 25.70        | 17.34 $\pm$ 71.48         | 54.08 $\pm$ 19.30             | 18/14                | 65.23 $\pm$ 18.50        | 14.94 $\pm$ 61.64         | 50.29 $\pm$ 17.20             | Follow-up not reported, PP              |
|                          | Haas et al. (2008)    | 12 mths.  | 12/12                | 65.90 $\pm$ 24.50        | 20.86 $\pm$ 31.41         | 45.04 $\pm$ 11.50             | 13/12                | 76.40 $\pm$ 21.80        | 31.94 $\pm$ 41.30         | 44.46 $\pm$ 13.48             | MD (SE) converted to MD (SD), PP        |
|                          | Povšič et al. (2021)  |           | 20/19                | 70.00 $\pm$ 32.04        | 13.66 $\pm$ 10.41         | 51.29 $\pm$ 24.11             | 20/19                | 76.40 $\pm$ 24.03        | 14.25 $\pm$ 14.42         | 56.58 $\pm$ 15.06             | PP                                      |
| 500mg od 5 days          | Morales et al. (2021) | 3 mths.   | 16/16                | 57.40 $\pm$ 10.20        | 41.90 $\pm$ 10.90         | 14.70 $\pm$ 11.10             | 15/15                | 52.50 $\pm$ 12.60        | 40.80 $\pm$ 13.30         | 0.20 $\pm$ 0.20               | ITT                                     |
|                          | Morales et al. (2021) | 6 mths.   | 16/16                | 57.40 $\pm$ 10.20        | 44.10 $\pm$ 13.50         | 13.20 $\pm$ 14.90             | 15/15                | 52.50 $\pm$ 12.60        | 42.30 $\pm$ 15.30         | 0.20 $\pm$ 0.30               | ITT                                     |
|                          | Sampaio et al. (2011) |           | 20/20                | 75.78 $\pm$ 24.51        | 9.91 $\pm$ 7.24           | 65.87 $\pm$ 5.71              | 20/20                | 81.93 $\pm$ 12.86        | 12.31 $\pm$ 8.83          | 69.62 $\pm$ 3.49              | MD $\pm$ SD not reported, ITT           |

| Dosage            | Author (Year)                | Follow-up | Intervention         |                      |                       |                           | Control              |                      |                       |                           | Notes                     |
|-------------------|------------------------------|-----------|----------------------|----------------------|-----------------------|---------------------------|----------------------|----------------------|-----------------------|---------------------------|---------------------------|
|                   |                              |           | Sample size (BL/End) | Baseline (Mean ± SD) | Follow-up (Mean ± SD) | BOP reduction (Mean ± SD) | Sample size (BL/End) | Baseline (Mean ± SD) | Follow-up (Mean ± SD) | BOP reduction (Mean ± SD) |                           |
|                   | Morales et al. (2021)        | 9 mths.   | 16/16                | 57.40 ± 10.20        | 48.10 ± 14.10         | 9.20 ± 15.00              | 15/15                | 52.50 ± 12.60        | 45.20 ± 13.10         | 0.10 ± 0.30               | ITT                       |
|                   | Morales et al. (2021)        | 12 mths.  | 16/16                | 57.40 ± 10.20        | 42.30 ± 13.30         | 15.00 ± 12.60             | 15/15                | 52.50 ± 12.60        | 40.80 ± 11.50         | 0.20 ± 0.20               | ITT                       |
|                   | Sampaio et al. (2011)        |           | 20/19                | 75.78 ± 24.51        | 10.01 ± 5.52          | 65.77 ± 5.76              | 20/19                | 81.93 ± 12.86        | 9.47 ± 7.71           | 72.46 ± 3.35              | MD ± SD not reported, ITT |
| Clarithromycin    |                              |           |                      |                      |                       |                           |                      |                      |                       |                           |                           |
| 500mg bd 3 days   | Andere et al. (2017)         | 3 mths    | 20/20                | 53.00 ± 19.00        | 15.00 ± 6.00          | 38.00 ± 4.46              | 20/20                | 54.00 ± 30.00        | 18.00 ± 5.90          | 36.00 ± 6.84              | MD ± SD not reported, ITT |
|                   | Andere et al. (2017)         | 6 mths.   | 20/20                | 53.00 ± 19.00        | 13.30 ± 5.00          | 39.70 ± 4.39              | 20/20                | 54.00 ± 30.00        | 18.00 ± 6.85          | 36.00 ± 6.88              |                           |
|                   | Bechara Andere et al. (2018) |           | 18/18                | 52.00 ± 19.00        | 13.00 ± 5.00          | 39.00 ± 4.63              | 18/18                | 59.00 ± 32.00        | 20.00 ± 8.00          | 39.00 ± 7.77              |                           |
| Metronidazole     |                              |           |                      |                      |                       |                           |                      |                      |                       |                           |                           |
| 400mg tds 14 days | Silva et al. (2011)          | 3 mths.   | 17/17                | 73.30 ± 22.40        | 15.70 ± 19.30         | 57.60 ± 7.17              | 17/17                | 70.90 ± 22.40        | 32.80 ± 25.10         | 38.10 ± 8.16              | MD ± SD not reported, ITT |
| Moxifloxacin      |                              |           |                      |                      |                       |                           |                      |                      |                       |                           |                           |
| 400mg od 7 days   | Ardila et al. (2015)         | 3 mths.   | 20/20                | 44.00 ± 10.00        | 9.30 ± 0.60           | 34.70 ± 1.76              | 20/20                | 47.00 ± 16.00        | 12.70 ± 0.40          | 34.30 ± 3.58              | MD ± SD not reported, ITT |
|                   |                              | 6 mths.   | 20/20                | 44.00 ± 10.00        | 9.40 ± 0.60           | 34.60 ± 2.24              | 20/20                | 47.00 ± 16.00        | 10.20 ± 0.40          | 36.80 ± 3.58              |                           |
| 400mg qid 7 days  | Ardila et al. (2020)         | 3 mths.   | 12/12                | 46.20 ± 6.00         | 8.80 ± 1.10           | 37.40 ± 1.74              | 12/11                | 45.50 ± 4.00         | 9.10 ± 0.80           | 36.40 ± 1.18              |                           |
|                   |                              | 6 mths.   | 12/12                | 46.20 ± 6.00         | 8.50 ± 0.70           | 37.70 ± 1.74              | 12/11                | 45.50 ± 4.00         | 8.90 ± 0.50           | 36.60 ± 1.16              |                           |

**Table S9.** Summary of adverse events reported in included studies

| Dosages                     | Authors                    | Test                                                                    |                                  | Control                                          |      |
|-----------------------------|----------------------------|-------------------------------------------------------------------------|----------------------------------|--------------------------------------------------|------|
|                             |                            | Adverse events                                                          | n                                | Adverse events                                   | n    |
| Amoxicillin + Metronidazole |                            |                                                                         |                                  |                                                  |      |
| 500mg + 500mg tds 7 days    | Ardila et al. (2020)       | Diarrhoea                                                               | 3                                | None                                             |      |
|                             |                            | Nausea                                                                  | 3                                |                                                  |      |
|                             |                            | Vomiting                                                                | 3                                |                                                  |      |
|                             |                            | Xajigeorgiou et al. (2006)                                              | Mild gastrointestinal discomfort | 2                                                | None |
| 500mg + 400mg tds 7 days    | Borges et al. (2017)       | Nausea                                                                  | 3                                | Nausea                                           | 1    |
|                             |                            | Diarrhoea                                                               | 1                                | Diarrhoea                                        | 1    |
|                             |                            | Metallic taste                                                          | 3                                | Metallic taste                                   | 2    |
|                             |                            | Headache or dizziness                                                   | 4                                | Headache or dizziness                            | 1    |
|                             |                            | Irritability or bad mood                                                | 2                                | Excessive sleep                                  | 2    |
|                             |                            | Weakness                                                                | 2                                |                                                  |      |
|                             |                            | Excessive sleep                                                         | 3                                |                                                  |      |
|                             | Dukić et al. (2016)        | Nausea, dizziness and/or anorexia                                       | NR                               | None                                             |      |
|                             | Harks et al. (2015)        | Serious adverse events (e.g., allergic reaction, anaphylactic reaction) | 3                                | Serious adverse events (e.g., allergic reaction) | 4    |
| 500mg + 400mg tds 14 days   | Borges et al. (2017)       | Nausea                                                                  | 3                                | Nausea                                           | 1    |
|                             |                            | Diarrhoea                                                               | 3                                | Diarrhoea                                        | 1    |
|                             |                            | Metallic taste                                                          | 6                                | Metallic taste                                   | 2    |
|                             |                            | Headache or dizziness                                                   | 6                                | Headache or dizziness                            | 1    |
|                             |                            | Irritability or bad mood                                                | 1                                | Excessive sleep                                  | 2    |
|                             |                            | Weakness                                                                | 3                                |                                                  |      |
|                             |                            | Excessive sleep                                                         | 2                                |                                                  |      |
|                             | Liaw et al. (2019)         | Mild gastrointestinal discomfort                                        | 3                                | None                                             |      |
|                             | Silva et al. (2011)        | Headache                                                                | 2                                | Metallic taste                                   | 1    |
|                             |                            | Metallic taste                                                          | 3                                | Weakness                                         | 2    |
|                             |                            | Vomiting                                                                | 3                                |                                                  |      |
|                             |                            | Irritability                                                            | 1                                |                                                  |      |
| 500mg + 250mg tds 7 days    | Borges et al. (2017)       | Nausea                                                                  | 2                                | Nausea                                           | 1    |
|                             |                            | Diarrhoea                                                               | 5                                | Diarrhoea                                        | 1    |
|                             |                            | Metallic taste                                                          | 6                                | Metallic taste                                   | 2    |
|                             |                            | Headache or dizziness                                                   | 5                                | Headache or dizziness                            | 1    |
|                             |                            | Irritability or bad mood                                                | 1                                | Excessive sleep                                  | 2    |
|                             |                            | Weakness                                                                | 2                                |                                                  |      |
|                             |                            | Excessive sleep                                                         | 5                                |                                                  |      |
|                             | Moeintaghavi et al. (2007) | Gastrointestinal disturbance                                            | 1                                | None                                             |      |
| 500mg + 250mg tds 14 days   | Borges et al. (2017)       | Nausea                                                                  | 2                                | Nausea                                           | 1    |

| Dosages                  | Authors                      | Test                              |    | Control                     |   |
|--------------------------|------------------------------|-----------------------------------|----|-----------------------------|---|
|                          |                              | Adverse events                    | n  | Adverse events              | n |
|                          |                              | Diarrhoea                         | 2  | Diarrhoea                   | 1 |
|                          |                              | Metallic taste                    | 7  | Metallic taste              | 2 |
|                          |                              | Headache or dizziness             | 2  | Headache or dizziness       | 1 |
|                          |                              | Irritability or bad mood          | 1  | Excessive sleep             | 2 |
|                          |                              | Weakness                          | 1  |                             |   |
|                          |                              | Excessive sleep                   | 4  |                             |   |
| 500mg + 200mg tds 7 days | Saleh et al. (2016)          | Stomach upset and nausea          | 2  | None                        |   |
|                          |                              | Diarrhoea                         | 1  |                             |   |
|                          |                              | Stomach upset and diarrhoea       | 2  |                             |   |
| 375mg + 250mg tds 7 days | Ribeiro et al. (2009)        | Nausea and diarrhoea              | 4  | None                        |   |
|                          | Taiete et al. (2016)         | Gastrointestinal discomfort       | 4  | Gastrointestinal discomfort | 1 |
|                          | Winkel et al. (2001)         | Gastrointestinal intolerance      | 9  | Rash                        | 1 |
|                          |                              | Rash                              | 2  |                             |   |
|                          |                              | Nausea                            | 1  |                             |   |
|                          | Azithromycin                 |                                   |    |                             |   |
| 500mg od 3 days          | Čuk et al. (2020)            | Headaches                         | 2  | Nausea                      | 1 |
|                          |                              |                                   |    | Headaches                   | 1 |
|                          | Gomi et al. (2007)           | Diarrhoea                         | 1  | None                        |   |
|                          | Haas et al. (2008)           | None                              |    | None                        |   |
|                          | Han et al. (2012)            | None                              |    | None                        |   |
|                          | Emingil et al. (2012)        | None                              |    | None                        |   |
|                          | Liaw et al. (2019)           | Mild gastrointestinal discomfort  | 1  | None                        |   |
|                          | Saleh et al. (2016)          | Stomach upset                     | 2  | None                        |   |
|                          |                              | Diarrhoea                         | 1  |                             |   |
|                          |                              | Increased frequency of urination  | 1  |                             |   |
| 500mg od 5 days          | Sampaio et al. (2011)        | Diarrhoea                         | 2  | Headache and dizziness      | 2 |
|                          |                              | Headache and dizziness            | 1  | Excessive sleepiness        | 3 |
|                          |                              | Excessive sleepiness              | 3  | Metallic taste              | 3 |
|                          |                              | Metallic taste                    | 2  | General unwellness          | 1 |
|                          |                              | General unwellness                | 1  |                             |   |
| 500mg qid 5 days         | Morales et al. (2021)        | Nausea                            | 1  | None                        |   |
| Cefixime                 |                              |                                   |    |                             |   |
| 400mg od 7 days          | Dukić et al. (2016)          | Nausea, dizziness and/or anorexia | NR | None                        |   |
| Clarithromycin           |                              |                                   |    |                             |   |
| 500mg bd 3 days          | Andere et al. (2017)         | Gastrointestinal discomfort       | 2  | None                        |   |
|                          | Bechara Andere et al. (2018) | Gastrointestinal discomfort       |    | None                        |   |
| 500mg tds 7 days         | Suryaprasanna et al. (2018)  | None                              |    | None                        |   |

| Dosages                     | Authors                    | Test             |   | Control        |   |
|-----------------------------|----------------------------|------------------|---|----------------|---|
|                             |                            | Adverse events   | n | Adverse events | n |
| Doxycycline                 |                            |                  |   |                |   |
| 200mg then 100mg od 14 days | Xajigeorgiou et al. (2006) | None             |   | None           |   |
| Metronidazole               |                            |                  |   |                |   |
| 500mg tds 7 days            | Xajigeorgiou et al. (2006) | Metallic taste   | 1 | None           |   |
| 400mg tds 14 days           | Silva et al. (2011)        | Diarrhoea        | 1 | Metallic taste | 1 |
|                             |                            | Headache         | 1 | Weakness       | 2 |
|                             |                            | Metallic taste   | 3 | Irritability   | 1 |
|                             |                            | Vomiting         | 1 |                |   |
|                             |                            | Irritability     | 1 |                |   |
| Moxifloxacin                |                            |                  |   |                |   |
| 400mg od 7 days             | Ardila et al. (2015)       | None             |   | None           |   |
| 400mg qid 7 days            | Ardila et al. (2020)       | None             |   | None           |   |
| Satranidazole               |                            |                  |   |                |   |
| 300mg bd 10 days            | Pradeep et al. (2013)      | Taste alteration | 3 | None           |   |
|                             |                            | Nausea           | 1 |                |   |

**Table S10.** The authors' judgement and support for judgements for each risk of bias of all included studies

| Domain              | Randomisation process |                                                                                                                   | Deviations from intended interventions |                                             | Missing outcome data |                       | Measurement of outcome |                                                      | Selection of the reported result |                                                | Overall bias |
|---------------------|-----------------------|-------------------------------------------------------------------------------------------------------------------|----------------------------------------|---------------------------------------------|----------------------|-----------------------|------------------------|------------------------------------------------------|----------------------------------|------------------------------------------------|--------------|
| Study               | Authors' judgement    | Support for judgement                                                                                             | Authors' judgement                     | Support for judgement                       | Authors' judgement   | Support for judgement | Authors' judgement     | Support for judgement                                | Authors' judgement               | Support for judgement                          |              |
| Andere et al., 2017 | Low                   | Computer-generated; independent personnel; concealed in sealed envelopes; no baseline characteristics imbalances. | Low                                    | Identical placebos; blinded clinician; ITT. | Low                  | No dropouts; ITT.     | Low                    | Appropriate method; calibrated and blinded examiner. | Low                              | Pre-specified analysis conducted and reported. | Low          |

| Domain                      | Randomisation process |                                                                                                                     | Deviations from intended interventions |                                            | Missing outcome data |                       | Measurement of outcome |                                                      | Selection of the reported result |                                                | Overall bias  |
|-----------------------------|-----------------------|---------------------------------------------------------------------------------------------------------------------|----------------------------------------|--------------------------------------------|----------------------|-----------------------|------------------------|------------------------------------------------------|----------------------------------|------------------------------------------------|---------------|
| Study                       | Authors' judgement    | Support for judgement                                                                                               | Authors' judgement                     | Support for judgement                      | Authors' judgement   | Support for judgement | Authors' judgement     | Support for judgement                                | Authors' judgement               | Support for judgement                          |               |
| Ardila et al. (2015)        | Low                   | Computer-generated permuted block; independent personnel; opaque envelopes; no baseline characteristics imbalances. | Low                                    | Identical placebo; blinded clinician; ITT. | Low                  | 4/40 dropouts; ITT.   | Low                    | Appropriate method; blinded and calibrated examiner. | Low                              | Pre-specified analysis conducted and reported. | Low           |
| Ardila et al. (2020)        | Low                   | Computer-generated permuted block; independent personnel; opaque envelopes; no baseline characteristics imbalances. | Low                                    | Identical placebo; triple blind; ITT.      | Low                  | 2/36 dropouts; ITT.   | Low                    | Appropriate method; blinded and calibrated examiner. | Low                              | Pre-specified analysis conducted and reported. | Low           |
| Basegmez et al. (2011)      | Some concerns         | Computer-generated; No information on allocation concealment; no baseline characteristics imbalances.               | Low                                    | Identical placebo; blinded clinician; ITT. | Low                  | No dropouts; ITT.     | Low                    | Appropriate method; calibrated and blinded examiner. | Low                              | Pre-specified analysis conducted and reported. | Some concerns |
| Bechara Andre et al. (2018) | Low                   | Computer-generated; independent personnel; no imbalances.                                                           | Low                                    | Identical placebo; blinded clinician; ITT. | Low                  | No dropouts; ITT.     | Low                    | Appropriate method; calibrated and blinded examiner. | Low                              | Pre-specified analysis conducted and reported. | Low           |

| Domain                 | Randomisation process |                                                                                                        | Deviations from intended interventions |                                                                                                    | Missing outcome data |                                                                         | Measurement of outcome |                                                                                                 | Selection of the reported result |                                                | Overall bias |
|------------------------|-----------------------|--------------------------------------------------------------------------------------------------------|----------------------------------------|----------------------------------------------------------------------------------------------------|----------------------|-------------------------------------------------------------------------|------------------------|-------------------------------------------------------------------------------------------------|----------------------------------|------------------------------------------------|--------------|
| Study                  | Authors' judgement    | Support for judgement                                                                                  | Authors' judgement                     | Support for judgement                                                                              | Authors' judgement   | Support for judgement                                                   | Authors' judgement     | Support for judgement                                                                           | Authors' judgement               | Support for judgement                          |              |
| Borges et al. (2017)   | Low                   | Computer-generated; independent personnel; no imbalances.                                              | Low                                    | Identical placebos; blinded clinician; ITT.                                                        | Low                  | 10/110 dropouts; ITT.                                                   | Low                    | Appropriate method; calibrated and blinded examiner.                                            | Low                              | Pre-specified analysis conducted and reported. | Low          |
| Buchmann et al. (2010) | Low                   | Randomisation (unclear); independent personnel; no information on baseline characteristics imbalances. | Low                                    | Identical placebos; blinded clinician; ITT                                                         | Low                  | No dropouts; ITT                                                        | Low                    | Appropriate method; calibrated and blinded examiner.                                            | Low                              | Pre-specified analysis conducted and reported. | Low          |
| Čuk et al, (2020)      | Low                   | Computer-generated; independent personnel; baseline characteristics included only those analysed.      | High                                   | Identical placebo; blinded clinician; PP analysis; characteristics of dropouts not described.      | Low                  | 2/40 dropouts; PP; dropouts due to personal reasons.                    | Low                    | Appropriate method; blinded and calibrated examiner                                             | Low                              | Pre-specified analysis conducted and reported. | High         |
| Dukić et al. (2016)    | Some concerns         | Randomisation done; No information on allocation concealment and baseline characteristics imbalances   | High                                   | No placebo; no information on clinician; number of subjects included in the analysis not reported. | High                 | Number of subjects completed and included in the analysis not reported. | Some concerns          | Appropriate method; No information on examiner; clinical assessment does not require judgement. | High                             | Number of included participants not reported.  | High         |

| Domain                | Randomisation process |                                                                                                                     | Deviations from intended interventions |                                                                                                | Missing outcome data |                                                      | Measurement of outcome |                                                                                        | Selection of the reported result |                                                | Overall bias |
|-----------------------|-----------------------|---------------------------------------------------------------------------------------------------------------------|----------------------------------------|------------------------------------------------------------------------------------------------|----------------------|------------------------------------------------------|------------------------|----------------------------------------------------------------------------------------|----------------------------------|------------------------------------------------|--------------|
| Study                 | Authors' judgement    | Support for judgement                                                                                               | Authors' judgement                     | Support for judgement                                                                          | Authors' judgement   | Support for judgement                                | Authors' judgement     | Support for judgement                                                                  | Authors' judgement               | Support for judgement                          |              |
| Emingil et al. (2012) | Low                   | Computer-generated; independent personnel; baseline characteristics included only those analysed.                   | High                                   | Identical placebo; blinded clinician; PP analysis; characteristics of dropouts not described.  | Low                  | 4/36 dropouts; PP; dropouts due to personal reasons. | Low                    | Appropriate methods; calibrated and blinded examiner.                                  | Low                              | Pre-specified analysis conducted and reported. | High         |
| Fonseca et al. (2015) | Low                   | Simple randomisation (unclear); sealed and opaque envelopes; baseline characteristics included only those analysed. | High                                   | No placebo; blinded clinician; PP analysis; characteristics of dropouts not described.         | Low                  | 3/60 dropouts; PP; >95% available data.              | Low                    | Appropriate method; calibrated and blinded examiner.                                   | Low                              | Pre-specified analysis conducted and reported. | High         |
| Gomi et al. (2007)    | Some concerns         | Randomisation done (unclear); No information on allocation concealment; no baseline characteristics imbalances      | Low                                    | No placebo; No information on clinician; according to study protocol; ITT.                     | Low                  | No dropouts; ITT.                                    | Some concerns          | No information on method and examiner; clinical assessment does not require judgement. | Low                              | Pre-specified analysis conducted and reported. | High         |
| Haas et al. (2008)    | Low                   | Means of draw; independent personnel; no baseline characteristics imbalances                                        | High                                   | Identical placebos; blinded clinician; PP analysis; characteristics of dropouts not described. | Low                  | 1/25 dropout; PP; >95% available data                | Low                    | Appropriate method; calibrated and blinded examiner.                                   | Low                              | Pre-specified analysis conducted and reported. | High         |



| Domain              | Randomisation process |                                                                                                                 | Deviations from intended interventions |                                                                                                                      | Missing outcome data |                                                                                   | Measurement of outcome |                                                             | Selection of the reported result |                                                | Overall bias |
|---------------------|-----------------------|-----------------------------------------------------------------------------------------------------------------|----------------------------------------|----------------------------------------------------------------------------------------------------------------------|----------------------|-----------------------------------------------------------------------------------|------------------------|-------------------------------------------------------------|----------------------------------|------------------------------------------------|--------------|
| Study               | Authors' judgement    | Support for judgement                                                                                           | Authors' judgement                     | Support for judgement                                                                                                | Authors' judgement   | Support for judgement                                                             | Authors' judgement     | Support for judgement                                       | Authors' judgement               | Support for judgement                          |              |
| Han et al. (2012)   | Low                   | Computer-generated; independent personnel; baseline characteristics included only those analysed.               | High                                   | Identical placebos; blinded clinician; PP analysis; characteristics of dropouts not described.                       | Low                  | 8/36 dropouts; PP; dropouts due to personal reasons.                              | Low                    | Appropriate method; calibrated and blinded examiner.        | Low                              | Pre-specified analysis conducted and reported. | High         |
| Harks et al. (2015) | Low                   | Quad-block randomisation; independent personnel; no baseline characteristics imbalances.                        | High                                   | Identical placebo; blinded clinician; PP analysis; characteristics of dropouts not described.                        | High                 | 161/506 dropouts; PP; dropouts due to SAE.                                        | Low                    | Appropriate method; calibrated and blinded examiner.        | Low                              | Pre-specified analysis conducted and reported. | High         |
| Li et al. (2017)    | Some concerns         | Randomisation done (unclear); no information on allocation concealment and baseline characteristics imbalances. | Low                                    | Placebo; no information on clinician; ITT                                                                            | Low                  | No dropouts; ITT                                                                  | Some concerns          | No information on method and calibration; blinded examiner. | Low                              | Pre-specified analysis conducted and reported  | High         |
| Liaw et al. (2019)  | Low                   | Block randomisation; sealed and opaque envelope; no baseline characteristics imbalances                         | High                                   | No placebo; blinded clinician; consistent to study protocol; PP analysis; characteristics of dropouts not described. | Low                  | 4/38 dropouts; PP; proportions of missing outcome between groups were comparable. | Low                    | Appropriate method; calibrated and blinded examiner.        | Low                              | Pre-specified analysis conducted and reported  | High         |

| Domain                     | Randomisation process |                                                                                                   | Deviations from intended interventions |                                                                                               | Missing outcome data |                                                            | Measurement of outcome |                                                      | Selection of the reported result |                                               | Overall bias |
|----------------------------|-----------------------|---------------------------------------------------------------------------------------------------|----------------------------------------|-----------------------------------------------------------------------------------------------|----------------------|------------------------------------------------------------|------------------------|------------------------------------------------------|----------------------------------|-----------------------------------------------|--------------|
| Study                      | Authors' judgement    | Support for judgement                                                                             | Authors' judgement                     | Support for judgement                                                                         | Authors' judgement   | Support for judgement                                      | Authors' judgement     | Support for judgement                                | Authors' judgement               | Support for judgement                         |              |
| Moeintaghavi et al. (2007) | Low                   | Coded study medication (unclear); sealed master code; no baseline characteristics imbalances.     | Low                                    | Identical placebo; blinded clinician; ITT.                                                    | Low                  | No dropouts; ITT.                                          | Low                    | Appropriate method; calibrated and blinded examiner. | Low                              | Pre-specified analysis conducted and reported | Low          |
| Morales et al. (2018)      | Low                   | Computer-generated; independent personnel; no baseline characteristics imbalances.                | Low                                    | Identical placebo; blinded clinician; ITT.                                                    | Low                  | No dropouts; ITT.                                          | Low                    | Appropriate method; calibrated and blinded examiner. | Low                              | Pre-specified analysis conducted and reported | Low          |
| Povšič et al. (2021)       | Low                   | Computer-generated; independent personnel; no baseline characteristics imbalances                 | High                                   | Identical placebo; blinded clinician; PP analysis; characteristics of dropouts not described  | Low                  | 2/40 dropouts; PP; >95% available data                     | Low                    | Appropriate method; calibrated and blinded examiner. | Low                              | Pre-specified analysis conducted and reported | High         |
| Pradeep et al. (2013)      | Low                   | Computer-generated; independent personnel; baseline characteristics included only those analysed. | High                                   | Identical placebo; blinded clinician; PP analysis; characteristics of dropouts not described. | High                 | 6/66 dropouts; PP; no description on reason of missingness | Low                    | Appropriate method; calibrated and blinded examiner. | Low                              | Pre-specified analysis conducted and reported | High         |
| Ribeiro et al. (2009)      | Low                   | Computer-generated; independent personnel; baseline characteristics included only those analysed. | High                                   | Placebo; blinded clinician; PP analysis; characteristics of dropouts not described.           | Low                  | 3/25 dropouts; PP; dropouts due to personal reasons.       | Low                    | Appropriate method; calibrated and blinded examiner. | Low                              | Pre-specified analysis conducted and reported | High         |

| Domain                      | Randomisation process |                                                                                                                          | Deviations from intended interventions |                                                                                               | Missing outcome data |                                                                                      | Measurement of outcome |                                                                                       | Selection of the reported result |                                               | Overall bias  |
|-----------------------------|-----------------------|--------------------------------------------------------------------------------------------------------------------------|----------------------------------------|-----------------------------------------------------------------------------------------------|----------------------|--------------------------------------------------------------------------------------|------------------------|---------------------------------------------------------------------------------------|----------------------------------|-----------------------------------------------|---------------|
| Study                       | Authors' judgement    | Support for judgement                                                                                                    | Authors' judgement                     | Support for judgement                                                                         | Authors' judgement   | Support for judgement                                                                | Authors' judgement     | Support for judgement                                                                 | Authors' judgement               | Support for judgement                         |               |
| Saleh et al. (2016)         | Low                   | Computer-generated; independent personnel; no baseline characteristics imbalances                                        | High                                   | Identical placebo; blinded clinician; PP analysis; characteristics of dropouts not described. | Low                  | 5/37 dropouts; PP; no difference in proportions of missing data between both groups. | Low                    | Appropriate method; calibrated and blinded examiner.                                  | Low                              | Pre-specified analysis conducted and reported | High          |
| Sampaio et al. (2011)       | Low                   | Computer-generated; independent personnel; no baseline characteristics imbalances                                        | Low                                    | Identical placebo; blinded clinician; ITT.                                                    | Low                  | 2/40 dropouts; ITT.                                                                  | Low                    | Appropriate method; calibrated and blinded examiner.                                  | Low                              | Pre-specified analysis conducted and reported | Low           |
| Sigusch et al. (2001)       | Some concerns         | Randomisation done (unclear); no information on the allocation concealment; no baseline characteristics imbalances.      | Low                                    | No placebo; no information on clinician; no deviations from study protocol; ITT.              | Low                  | No dropouts; ITT.                                                                    | Low                    | Appropriate method; calibrated and blinded examiner.                                  | Low                              | Pre-specified analysis conducted and reported | Some concerns |
| Silva et al. (2011)         | Low                   | Computer-generated; independent personnel; no baseline characteristics imbalances                                        | Low                                    | Placebo in identical opaque plastic bottle; blinded clinician; ITT.                           | Low                  | No dropouts; ITT.                                                                    | Low                    | Appropriate method; calibrated and blinded examiner.                                  | Low                              | Pre-specified analysis conducted and reported | Low           |
| Suryaprasanna et al. (2018) | Some concerns         | Randomisation done (unclear); no information on allocation concealment; no apparent baseline characteristics imbalances. | Low                                    | No placebo; blinded clinician; no deviations from study protocol; ITT.                        | Low                  | No dropouts; ITT.                                                                    | Low                    | Appropriate method; by one examiner; no information on calibration; blinded examiner. | Low                              | Pre-specified analysis conducted and reported | Some concerns |

| Domain                     | Randomisation process |                                                                                                                 | Deviations from intended interventions |                                                                                                         | Missing outcome data |                                                               | Measurement of outcome |                                                                      | Selection of the reported result |                                               | Overall bias |
|----------------------------|-----------------------|-----------------------------------------------------------------------------------------------------------------|----------------------------------------|---------------------------------------------------------------------------------------------------------|----------------------|---------------------------------------------------------------|------------------------|----------------------------------------------------------------------|----------------------------------|-----------------------------------------------|--------------|
| Study                      | Authors' judgement    | Support for judgement                                                                                           | Authors' judgement                     | Support for judgement                                                                                   | Authors' judgement   | Support for judgement                                         | Authors' judgement     | Support for judgement                                                | Authors' judgement               | Support for judgement                         |              |
| Taiete et al. (2016)       | Low                   | Computer-generated; independent personnel; baseline characteristics included only those analysed.               | High                                   | No placebo; blinded clinician; PP analysis; characteristics of dropouts not described                   | Low                  | 9/48 dropouts; PP analysis; dropouts due to personal reasons  | Low                    | Appropriate method; calibrated and blinded examiner.                 | Low                              | Pre-specified analysis conducted and reported | High         |
| Winkel et al. (2001)       | Some concerns         | Randomisation done (unclear); no information on allocation concealment and baseline characteristics imbalances. | High                                   | Identical placebo; no information on clinician; PP analysis; characteristics of dropouts not described. | High                 | 4/54 dropouts; PP analysis; 2 dropouts due to AE.             | Some concerns          | Appropriate method; no information on calibration; blinded examiner. | Low                              | Pre-specified analysis conducted and reported | High         |
| Xajigeorgiou et al. (2006) | Low                   | Random tables; independent personnel; baseline characteristics included only those analysed.                    | High                                   | No placebo; blinded clinician; PP analysis; characteristics of dropouts not described                   | Low                  | 5/48 dropouts; PP analysis; dropouts due to personal reasons. | Low                    | Appropriate method; calibrated and blinded examiner.                 | Low                              | Pre-specified analysis conducted and reported | High         |

**Table S11.** Pairwise comparisons of interventions with direct comparisons and source of heterogeneity in the substantially heterogenous comparison

| No.                                             | Comparisons      |                     | m  | o   | MD [95% CI]<br>(IV, Random) | I²    | Outliers                                                              | Influential cases                           | Large overall<br>heterogeneity<br>contribution |
|-------------------------------------------------|------------------|---------------------|----|-----|-----------------------------|-------|-----------------------------------------------------------------------|---------------------------------------------|------------------------------------------------|
|                                                 | Treatment 1      | Treatment 2         |    |     |                             |       |                                                                       |                                             |                                                |
| Systemic antibiotics: Short-term CAL gain       |                  |                     |    |     |                             |       |                                                                       |                                             |                                                |
| 1.                                              | SRP + CLM        | SRP + Placebo/alone | 2  | 70  | -0.22 [-0.30, -0.14]        | 0%    |                                                                       |                                             |                                                |
| 2.                                              | SRP + MOX        | SRP + Placebo/alone | 2  | 64  | -0.74 [-0.92, -0.55]        | 67.7% | None                                                                  | None                                        | Ardila et al. (2020)                           |
| 3.                                              | SRP + AMOX + MET | SRP +MOX            | 1  | 24  | 0.09 [-0.11, 0.29]          |       |                                                                       |                                             |                                                |
| 4.                                              | SRP + AMOX + MET | SRP + Placebo/alone | 12 | 466 | -0.29 [-0.46, -0.12]        | 83.7% | Ardila et al. (2020)<br>Silva et al. (2011)<br>Buchmann et al. (2010) | Ardila et al. (2020)<br>Silva et al. (2011) | Ardila et al. (2020)<br>Silva et al. (2011)    |
| 5.                                              | SRP + MINO HCl   | SRP + Placebo/alone | 2  | 80  | -0.09 [-0.30, 0.11]         | 0%    | -                                                                     | -                                           |                                                |
| 6.                                              | SRP + AZ         | SRP + Placebo/alone | 10 | 285 | -0.10 [-0.27, 0.07]         | 78.1% | Gomi et al., (2007)                                                   | Gomi et al., (2007)                         | Gomi et al., (2007)                            |
| 7.                                              | SRP + SEC        | SRP + Placebo/alone | 1  | 50  | -0.20 [-0.42, 0.02]         |       |                                                                       |                                             |                                                |
| 8.                                              | SRP + SZ         | SRP + Placebo/alone | 2  | 120 | -1.86 [-2.34, -1.38]        | 0%    |                                                                       |                                             |                                                |
| 9.                                              | SRP + AMOX + MET | SRP + AZ            | 2  | 45  | -0.07 [-0.69, 0.54]         | 81.9% | None                                                                  | None                                        | Saleh et al. (2016)                            |
| 10.                                             | SRP + AMOX + MET | SRP + MET           | 2  | 56  | -0.08 [-0.33, 0.17]         | 9.8%  |                                                                       |                                             |                                                |
| 11.                                             | SRP + MET        | SRP + Placebo/alone | 2  | 57  | -0.19 [-0.13, 0.51]         | 58.2% | None                                                                  | None                                        | Xajigeorgiou et al.<br>(2006)                  |
| 12.                                             | SRP + AMOX + MET | SRP + DOX           | 1  | 20  | -0.06 [-0.57, 0.45]         |       |                                                                       |                                             |                                                |
| 13.                                             | SRP + DOX        | SRP + MET           | 1  | 22  | 0.14 [-0.38, 0.66]          |       |                                                                       |                                             |                                                |
| 14.                                             | SRP + DOX        | SRP + Placebo/alone | 1  | 21  | 0.15 [-0.32, 0.62]          |       |                                                                       |                                             |                                                |
| 15.                                             | SRP + AMOX + MET | SRP + CEF           | 1  | 60  | -0.04 [-0.18, 0.10]         |       |                                                                       |                                             |                                                |
| 16.                                             | SRP + CEF        | SRP + Placebo/alone | 1  | 60  | -0.12 [-0.26, 0.02]         |       |                                                                       |                                             |                                                |
| Systemic antibiotics intermediate-term CAL gain |                  |                     |    |     |                             |       |                                                                       |                                             |                                                |
| 1.                                              | SRP + CLM        | SRP + Placebo/alone | 3  | 106 | -0.11 [-0.44, 0.22]         | 91.2% | None                                                                  | Bechara Andere et al.<br>(2018)             | Bechara Andere et al.<br>(2018)                |
| 2.                                              | SRP + MOX        | SRP + Placebo/alone | 2  | 64  | -0.81 [-1.20, -0.42]        | 92.8% | None                                                                  | None                                        | Ardila et al. (2020)                           |
| 3.                                              | SRP + AMOX + MET | SRP + Placebo/alone | 9  | 334 | -0.46 [-0.61, -0.31]        | 69.8% | None                                                                  | Ardila et al. (2020)                        | Ardila et al. (2020)                           |
| 4.                                              | SRP + MOX        | SRP + AMOX + MET    | 1  | 24  | -0.11 [-0.31, 0.09]         |       |                                                                       |                                             |                                                |
| 5.                                              | SRP + MINO HCl   | SRP + Placebo/alone | 1  | 40  | -0.07 [-0.33, 0.19]         |       |                                                                       |                                             |                                                |
| 6.                                              | SRP + AZ         | SRP + Placebo/alone | 9  | 294 | -0.15 [-0.40, 0.10]         | 84.1% | Gomi et al., (2007)                                                   | Gomi et al., (2007)                         | Gomi et al., (2007)                            |

| No.                                            | Comparisons         |                     | m  | o   | MD [95% CI]<br>(IV, Random) | I <sup>2</sup> | Outliers                                                           | Influential cases                                          | Large overall<br>heterogeneity<br>contribution             |
|------------------------------------------------|---------------------|---------------------|----|-----|-----------------------------|----------------|--------------------------------------------------------------------|------------------------------------------------------------|------------------------------------------------------------|
|                                                | Treatment 1         | Treatment 2         |    |     |                             |                |                                                                    |                                                            |                                                            |
| 7.                                             | SRP + SZ            | SRP + Placebo/alone | 1  | 60  | -2.07 [-2.71, -1.43]        |                |                                                                    |                                                            |                                                            |
| 8.                                             | SRP + Clindamycin   | SRP + Placebo/alone | 1  | 21  | -1.10 [-1.45, -0.75]        |                |                                                                    |                                                            |                                                            |
| 9.                                             | SRP + DOX           | SRP + Placebo/alone | 2  | 43  | -0.52 [0.79, -0.25]         | 0%             |                                                                    |                                                            |                                                            |
| 10.                                            | SRP + MET           | SRP + Placebo/alone | 2  | 48  | -0.98 [-1.62, -0.34]        | 87.6%          | None                                                               | None                                                       | Xajigeorgiou et al.<br>(2006)                              |
| 11.                                            | SRP + Clindamycin   | SRP + DOX           | 1  | 23  | -0.50 [-0.83, -0.17]        |                |                                                                    |                                                            |                                                            |
| 12.                                            | SRP + Clindamycin   | SRP + MET           | 1  | 26  | 0.20 [-0.10, 0.50]          |                |                                                                    |                                                            |                                                            |
| 13.                                            | SRP + DOX           | SRP + MET           | 2  | 49  | 0.59 [0.25, 0.93]           | 30.3%          |                                                                    |                                                            |                                                            |
| 14.                                            | SRP + DOX           | SRP + AMOX + MET    | 1  | 20  | 0.11 [-0.46, 0.69]          |                |                                                                    |                                                            |                                                            |
| 15.                                            | SRP + MET           | SRP + AMOX + MET    | 1  | 22  | -0.21 [-0.65, 0.23]         |                |                                                                    |                                                            |                                                            |
| Systemic antibiotics: Long-term CAL gain       |                     |                     |    |     |                             |                |                                                                    |                                                            |                                                            |
| 1.                                             | SRP + AZ            | SRP + Placebo/alone | 4  | 136 | -0.03 [-0.40, 0.35]         | 60.2%          | None                                                               | None                                                       | Haas et al. (2008)                                         |
| 2.                                             | SRP + Clindamycin   | SRP + Placebo/alone | 1  | 21  | -1.50 [-1.81, -1.19]        |                |                                                                    |                                                            |                                                            |
| 3.                                             | SRP + DOX           | SRP + Placebo/alone | 1  | 22  | -0.50 [-0.81, -0.19]        |                |                                                                    |                                                            |                                                            |
| 4.                                             | SRP + MET           | SRP + Placebo/alone | 1  | 25  | -1.80 [-2.09, -1.51]        |                |                                                                    |                                                            |                                                            |
| 5.                                             | SRP + Clindamycin   | SRP + DOX           | 1  | 23  | -1.00 [-1.32, -0.68]        |                |                                                                    |                                                            |                                                            |
| 6.                                             | SRP + Clindamycin   | SRP + MET           | 1  | 26  | 0.30 [-0.00, 0.60]          |                |                                                                    |                                                            |                                                            |
| 7.                                             | SRP + DOX           | SRP + MET           | 1  | 27  | 1.30 [1.00, 1.60]           |                |                                                                    |                                                            |                                                            |
| 8.                                             | SRP + AMOX + MET    | SRP + Placebo/alone | 5  | 682 | -0.42 [-0.52, -0.31]        | 71.4%          | None                                                               | None                                                       | Borges et al. (2017) –<br>Arm A, B & C                     |
| Systemic antibiotics: Short-term PPD reduction |                     |                     |    |     |                             |                |                                                                    |                                                            |                                                            |
| 1.                                             | SRP + MINO HCl      | SRP + Placebo/alone | 2  | 80  | -0.18 [-0.42, 0.06]         | 0%             |                                                                    |                                                            |                                                            |
| 2.                                             | SRP + AZ            | SRP + Placebo/alone | 10 | 285 | -0.14 [-0.43, 0.15]         | 95.7%          | Emingil et al. (2012) at<br>3-months<br>Gomi et al. (2007)         | Emingil et al. (2012) at<br>3-months<br>Gomi et al. (2007) | Emingil et al. (2012) at<br>3-months<br>Gomi et al. (2007) |
| 3.                                             | SRP + Placebo/alone | SRP + SZ            | 2  | 120 | -1.62 [-2.08, -1.15]        | 0%             |                                                                    |                                                            |                                                            |
| 4.                                             | SRP + AZ            | SRP + AMOX + MET    | 2  | 45  | 0.18 [-0.33, 0.68]          | 84.3%          | None                                                               | None                                                       | Saleh et al. (2016)                                        |
| 5.                                             | SRP + AMOX + MET    | SRP + Placebo/alone | 12 | 466 | -0.56 [-0.81, -0.32]        | 97.9%          | Ardila et al. (2020)<br>Dukić et al. (2016)<br>Silva et al. (2011) | None                                                       | Ardila et al. (2020)<br>Sillva et al. (2011)               |
| 6.                                             | SRP + CLM           | SRP + Placebo/alone | 2  | 70  | -0.57 [-1.49, 0.35]         | 98.9%          | None                                                               | None                                                       | Suryaprasanna et al.<br>(2018)                             |

| No.                                                   | Comparisons       |                     | m | o   | MD [95% CI]<br>(IV, Random) | I <sup>2</sup> | Outliers                                      | Influential cases                                                 | Large overall<br>heterogeneity<br>contribution                    |
|-------------------------------------------------------|-------------------|---------------------|---|-----|-----------------------------|----------------|-----------------------------------------------|-------------------------------------------------------------------|-------------------------------------------------------------------|
|                                                       | Treatment 1       | Treatment 2         |   |     |                             |                |                                               |                                                                   |                                                                   |
| 7.                                                    | SRP + MOX         | SRP + Placebo/alone | 2 | 64  | -0.70 [-1.16, -0.25]        | 95.6%          | None                                          | None                                                              | Ardila et al. (2020)                                              |
| 8.                                                    | SRP + MOX         | SRP + AMOX + MET    | 1 | 24  | 0.09 [-0.07, 0.25]          |                |                                               |                                                                   |                                                                   |
| 9.                                                    | SRP + SEC         | SRP + Placebo/alone | 1 | 50  | -0.20 [-0.39, -0.01]        |                |                                               |                                                                   |                                                                   |
| 10.                                                   | SRP + MET         | SRP + AMOX + MET    | 2 | 56  | 0.13 [-0.24, 0.49]          | 71.8%          | None                                          | None                                                              | Silva et al. (2011)                                               |
| 11.                                                   | SRP + MET         | SRP + Placebo/alone | 2 | 57  | -0.80 [-1.95, 0.34]         | 97.9%          | None                                          | None                                                              | Silva et al. (2011)                                               |
| 12.                                                   | SRP + DOX         | SRP + AMOX + MET    | 1 | 60  | 0.43 [0.16, 0.70]           |                |                                               |                                                                   |                                                                   |
| 13.                                                   | SRP + DOX         | SRP + MET           | 1 | 22  | 0.48 [0.27, 0.69]           |                |                                               |                                                                   |                                                                   |
| 14.                                                   | SRP + DOX         | SRP + Placebo/alone | 1 | 21  | 0.26 [0.02, 0.50]           |                |                                               |                                                                   |                                                                   |
| 15.                                                   | SRP + CEF         | SRP + AMOX + MET    | 1 | 60  | -0.01 [-0.03, 0.01]         |                |                                               |                                                                   |                                                                   |
| 16.                                                   | SRP + CEF         | SRP + Placebo/alone | 1 | 60  | -0.04 [-0.06, -0.02]        |                |                                               |                                                                   |                                                                   |
| Systemic antibiotics: Intermediate-term PPD reduction |                   |                     |   |     |                             |                |                                               |                                                                   |                                                                   |
| 1.                                                    | SRP + CLM         | SRP + Placebo/alone | 3 | 106 | -0.06 [-0.38, 0.26]         | 87.0%          | None                                          | Bechara Andere et al.<br>(2018)<br>Suryaprasanna et al.<br>(2018) | Bechara Andere et al.<br>(2018)<br>Suryaprasanna et al.<br>(2018) |
| 2.                                                    | SRP + MOX         | SRP + Placebo/alone | 2 | 64  | -0.65 [-1.25, -0.05]        | 97.3%          | None                                          | None                                                              | Ardila et al. (2020)                                              |
| 3.                                                    | SRP + AMOX + MET  | SRP + Placebo/alone | 9 | 334 | -0.65 [-0.80, -0.50]        | 88.7%          | Ardila et al. (2020)<br>Ribeiro et al. (2009) | None                                                              | Ardila et al. (2020)                                              |
| 4.                                                    | SRP + MOX         | SRP + AMOX + MET    | 1 | 24  | 0.07 [-0.09, 0.23]          |                |                                               |                                                                   |                                                                   |
| 5.                                                    | SRP + MINO HCl    | SRP + Placebo/alone | 1 | 40  | -0.20 [-0.60, 0.20]         |                |                                               |                                                                   |                                                                   |
| 6.                                                    | SRP + AZ          | SRP + Placebo/alone | 9 | 294 | -0.14 [-0.36, 0.08]         | 91.5%          | Pradeep et al. (2013)                         | Gomi et al. (2007)                                                | Pradeep et al. (2013)<br>Gomi et al. (2007)                       |
| 7.                                                    | SRP + SZ          | SRP + Placebo/alone | 1 | 60  | -2.42 [-3.01, -1.83]        |                |                                               |                                                                   |                                                                   |
| 8.                                                    | SRP + Clindamycin | SRP + Placebo/alone | 1 | 21  | -0.90 [-1.25, -0.55]        |                |                                               |                                                                   |                                                                   |
| 9.                                                    | SRP + DOX         | SRP + Placebo/alone | 2 | 43  | -0.24 [-0.44, -0.05]        | 0%             |                                               |                                                                   |                                                                   |
| 10.                                                   | SRP + MET         | SRP + Placebo/alone | 2 | 48  | -1.04 [-1.30, -0.79]        | 48.3%          |                                               |                                                                   |                                                                   |
| 11.                                                   | SRP + Clindamycin | SRP + DOX           | 1 | 23  | -0.60 [-0.91, -0.29]        |                |                                               |                                                                   |                                                                   |
| 12.                                                   | SRP + Clindamycin | SRP + MET           | 1 | 26  | 0.00 [-0.29, 0.29]          |                |                                               |                                                                   |                                                                   |
| 13.                                                   | SRP + DOX         | SRP + MET           | 2 | 49  | 0.78 [0.43, 1.13]           | 79.2%          | None                                          | None                                                              | Xajigeorgiou et al.<br>(2006)                                     |
| 14.                                                   | SRP + DOX         | SRP + AMOX + MET    | 1 | 20  | 0.62 [0.32, 0.92]           |                |                                               |                                                                   |                                                                   |

| No.                                                   | Comparisons       |                     | m | o   | MD [95% CI]<br>(IV, Random) | I <sup>2</sup> | Outliers                                                | Influential cases    | Large overall<br>heterogeneity<br>contribution          |
|-------------------------------------------------------|-------------------|---------------------|---|-----|-----------------------------|----------------|---------------------------------------------------------|----------------------|---------------------------------------------------------|
|                                                       | Treatment 1       | Treatment 2         |   |     |                             |                |                                                         |                      |                                                         |
| 15.                                                   | SRP + MET         | SRP + AMOX + MET    | 1 | 22  | -0.34 [-0.61, -0.07]        |                |                                                         |                      |                                                         |
| Systemic antibiotics: Long-term PPD reduction         |                   |                     |   |     |                             |                |                                                         |                      |                                                         |
| 1.                                                    | SRP + AZ          | SRP + Placebo/alone | 4 | 136 | -0.15 [-0.51, 0.21]         | 53.9%          | None                                                    | None                 | Haas et al. (2008)                                      |
| 2.                                                    | SRP + Clindamycin | SRP + Placebo/alone | 1 | 26  | -1.60 [-1.91, -1.29]        |                |                                                         |                      |                                                         |
| 3.                                                    | SRP + DOX         | SRP + Placebo/alone | 1 | 22  | -0.60 [-0.89 -0.31]         |                |                                                         |                      |                                                         |
| 4.                                                    | SRP + MET         | SRP + Placebo/alone | 1 | 25  | -1.90 [-2.14, -1.66]        |                |                                                         |                      |                                                         |
| 5.                                                    | SRP + Clindamycin | SRP + DOX           | 1 | 23  | -1.00 [-1.31, -0.69]        |                |                                                         |                      |                                                         |
| 6.                                                    | SRP + Clindamycin | SRP + MET           | 1 | 26  | 0.30 [0.03, 0.57]           |                |                                                         |                      |                                                         |
| 7.                                                    | SRP + DOX         | SRP + MET           | 1 | 27  | 1.30 [1.06, 1.54]           |                |                                                         |                      |                                                         |
| 8.                                                    | SRP + AMOX + MET  | SRP + Placebo/alone | 5 | 682 | -0.49 [-0.58, -0.40]        | 79.2%          | Harks et al. (2014)                                     | None                 | Borges et al. (2017) –<br>Arm D                         |
| Systemic antibiotics: Short-term BOP reduction        |                   |                     |   |     |                             |                |                                                         |                      |                                                         |
| 1.                                                    | SRP + CLM         | SRP + Placebo/alone | 1 | 40  | -2.00 [-5.58, 1.58]         |                |                                                         |                      |                                                         |
| 2.                                                    | SRP + MOX         | SRP + Placebo/alone | 2 | 64  | -0.82 [-1.83, 0.18]         | 0%             |                                                         |                      |                                                         |
| 3.                                                    | SRP + MOX         | SRP + AMOX + MET    | 1 | 24  | 0.60 [-0.55, 1.75]          |                |                                                         |                      |                                                         |
| 4.                                                    | SRP + AMOX + MET  | SRP + Placebo/alone | 9 | 328 | -8.17 [-12.85, -3.49]       | 94.6%          | Ardila et al. (2020)<br>Borges et al. (2017) –<br>Arm D | Ardila et al. (2020) | Borges et al. (2017) –<br>Arm C & D                     |
| 5.                                                    | SRP + AZ          | SRP + Placebo/alone | 8 | 228 | -4.26 [-6.47, -2.05]        | 33.0%          |                                                         |                      |                                                         |
| 6.                                                    | SRP + AZ          | SRP + AMOX + MET    | 2 | 45  | 4.35 [-1.92; 10.62]         | 18.7%          |                                                         |                      |                                                         |
| 7.                                                    | SRP + MET         | SRP + AMOX + MET    | 1 | 34  | -16.20 [-21.11, -11.29]     |                |                                                         |                      |                                                         |
| 8.                                                    | SRP + MET         | SRP + Placebo/alone | 1 | 34  | -19.50 [-24.67, -14.34]     |                |                                                         |                      |                                                         |
| Systemic antibiotics: Intermediate-term BOP reduction |                   |                     |   |     |                             |                |                                                         |                      |                                                         |
| 1.                                                    | SRP + CLM         | SRP + Placebo/alone | 2 | 76  | -2.01 [-5.63, 1.60]         | 42.5%          |                                                         |                      |                                                         |
| 2.                                                    | SRP + MOX         | SRP + Placebo/alone | 2 | 64  | 0.47 [-2.76, 3.70]          | 88.5%          | None                                                    | None                 | Ardila et al. (2015)                                    |
| 3.                                                    | SRP + AMOX + MET  | SRP + Placebo/alone | 5 | 200 | -8.52 [-13.92, -3.12]       | 96.4%          | Ardila et al. (2020)                                    | Ardila et al. (2020) | Ardila et al. (2020)<br>Borges et al. (2017) –<br>Arm D |
| 4.                                                    | SRP + MOX         | SRP + AMOX + MET    | 1 | 24  | 0.40 [-0.73, 1.53]          |                |                                                         |                      |                                                         |
| 5.                                                    | SRP + AZ          | SRP + Placebo/alone | 6 | 197 | -3.80 [-6.61, -0.99]        | 39.9%          |                                                         |                      |                                                         |



| No.                                                | Comparisons            |                     | m | o   | MD [95% CI]<br>(IV, Random) | I²    | Outliers | Influential cases                             | Large overall<br>heterogeneity<br>contribution |
|----------------------------------------------------|------------------------|---------------------|---|-----|-----------------------------|-------|----------|-----------------------------------------------|------------------------------------------------|
|                                                    | Treatment 1            | Treatment 2         |   |     |                             |       |          |                                               |                                                |
| Systemic antibiotics: Long-term BOP reduction      |                        |                     |   |     |                             |       |          |                                               |                                                |
| 1.                                                 | SRP + AZ               | SRP + Placebo/alone | 4 | 136 | 2.58 [-3.15, 8.30]          | 56.7% | None     | None                                          | Morales et al. (2021)                          |
| 2.                                                 | SRP + AMOX + MET       | SRP + Placebo/alone | 4 | 176 | -14.28 [-16.59, -11.97]     | 58.0% | None     | Borges et al. (2017) –<br>Arm B               | Borges et al. (2017) –<br>Arm B & C            |
| Local antibiotics: Short-term CAL gain             |                        |                     |   |     |                             |       |          |                                               |                                                |
| 1.                                                 | SRP + TET fibre        | SRP + Placebo/alone | 3 | 140 | 0.68 [0.57, 0.79]           | 0%    |          |                                               |                                                |
| 2.                                                 | SRP + MINO microsphere | SRP + MET gel       | 2 | 80  | -0.60 [-0.83, -0.37]        | 0%    |          |                                               |                                                |
| 3.                                                 | SRP + MET gel          | SRP + Placebo/alone | 2 | 80  | 0.35 [0.11, 0.60]           | 0%    |          |                                               |                                                |
| 4.                                                 | SRP + MINO microsphere | SRP + Placebo/alone | 2 | 80  | -0.95 [-1.17, -0.73]        | 0%    |          |                                               |                                                |
| Local antibiotics: Intermediate-term CAL gain      |                        |                     |   |     |                             |       |          |                                               |                                                |
| 1.                                                 | SRP + MET gel          | SRP + Placebo/alone | 2 | 318 | -0.64 [-1.76, 0.48]         | 99.9% | None     | None                                          | Stelzel & Flores-de-<br>Jacoby (2000)          |
| Local antibiotics: Short-term PPD reduction        |                        |                     |   |     |                             |       |          |                                               |                                                |
| 1.                                                 | SRP + MET gel          | SRP + Placebo/alone | 3 | 100 | -0.45 [-1.35, 0.45]         | 98.7% | None     | Mahmood et al. (2019)                         | Mahmood et al. (2019)                          |
| 2.                                                 | SRP + TET fibre        | SRP + Placebo/alone | 3 | 140 | -0.62 [-0.87, -0.37]        | 86.8% | None     | None                                          | Dang et al. (2016)                             |
| 3.                                                 | SRP + MINO microsphere | SRP + Placebo/alone | 4 | 178 | -0.96 [-1.35, -0.56]        | 94.7% | None     | Pandit et al. (2013)<br>Querido et al. (2004) | Pandit et al. (2013)<br>Querido et al. (2004)  |
| 4.                                                 | SRP + MINO microsphere | SRP + MET gel       | 2 | 80  | -0.40 [-0.52, -0.28]        | 0%    |          |                                               |                                                |
| Local antibiotics: Intermediate-term PPD reduction |                        |                     |   |     |                             |       |          |                                               |                                                |
| 1.                                                 | SRP + MET gel          | SRP + Placebo/alone | 2 | 318 | -0.50 [-1.13, 0.13]         | 99.8% | None     | None                                          | Stelzel & Flores-de-<br>Jacoby (2000)          |
| 2.                                                 | SRP + MINO microsphere | SRP + Placebo/alone | 2 | 52  | -0.74 [-1.02, -0.47]        | 29.8% |          |                                               |                                                |
| Local antibiotics: Long-term PPD reduction         |                        |                     |   |     |                             |       |          |                                               |                                                |
| 1.                                                 | SRP + MINO microsphere | SRP + Placebo/alone | 2 | 52  | -0.79 [-1.35, -0.22]        | 75.6% | None     | None                                          | Cortelli et al. (2006) at<br>24-months         |
| Local antibiotics: Intermediate-term BOP reduction |                        |                     |   |     |                             |       |          |                                               |                                                |
| 1.                                                 | SRP + MET gel          | SRP + Placebo/alone | 1 | 118 | 8.00 [6.20, 9.80]           |       |          |                                               |                                                |
| Antimicrobial Peptides: Short-term CAL gain        |                        |                     |   |     |                             |       |          |                                               |                                                |
| 1.                                                 | SRP + AMP              | SRP + Placebo/alone | 2 | 318 | -0.18 [-0.61, 0.25]         | 0%    |          |                                               |                                                |
| Antimicrobial Peptides: Short-term PPD reduction   |                        |                     |   |     |                             |       |          |                                               |                                                |
| 1.                                                 | SRP + AMP              | SRP + Placebo/alone | 2 | 318 | -0.10 [-0.52, 0.32]         | 0%    |          |                                               |                                                |

| No.                                              | Comparisons |                     | m | o   | MD [95% CI]<br>(IV, Random) | I <sup>2</sup> | Outliers | Influential cases | Large overall<br>heterogeneity<br>contribution |
|--------------------------------------------------|-------------|---------------------|---|-----|-----------------------------|----------------|----------|-------------------|------------------------------------------------|
|                                                  | Treatment 1 | Treatment 2         |   |     |                             |                |          |                   |                                                |
| Antimicrobial Peptides: Short-term BOP reduction |             |                     |   |     |                             |                |          |                   |                                                |
| 1.                                               | SRP + AMP   | SRP + Placebo/alone | 2 | 318 | -9.15 [-22.37, 4.08]        | 0%             |          |                   |                                                |

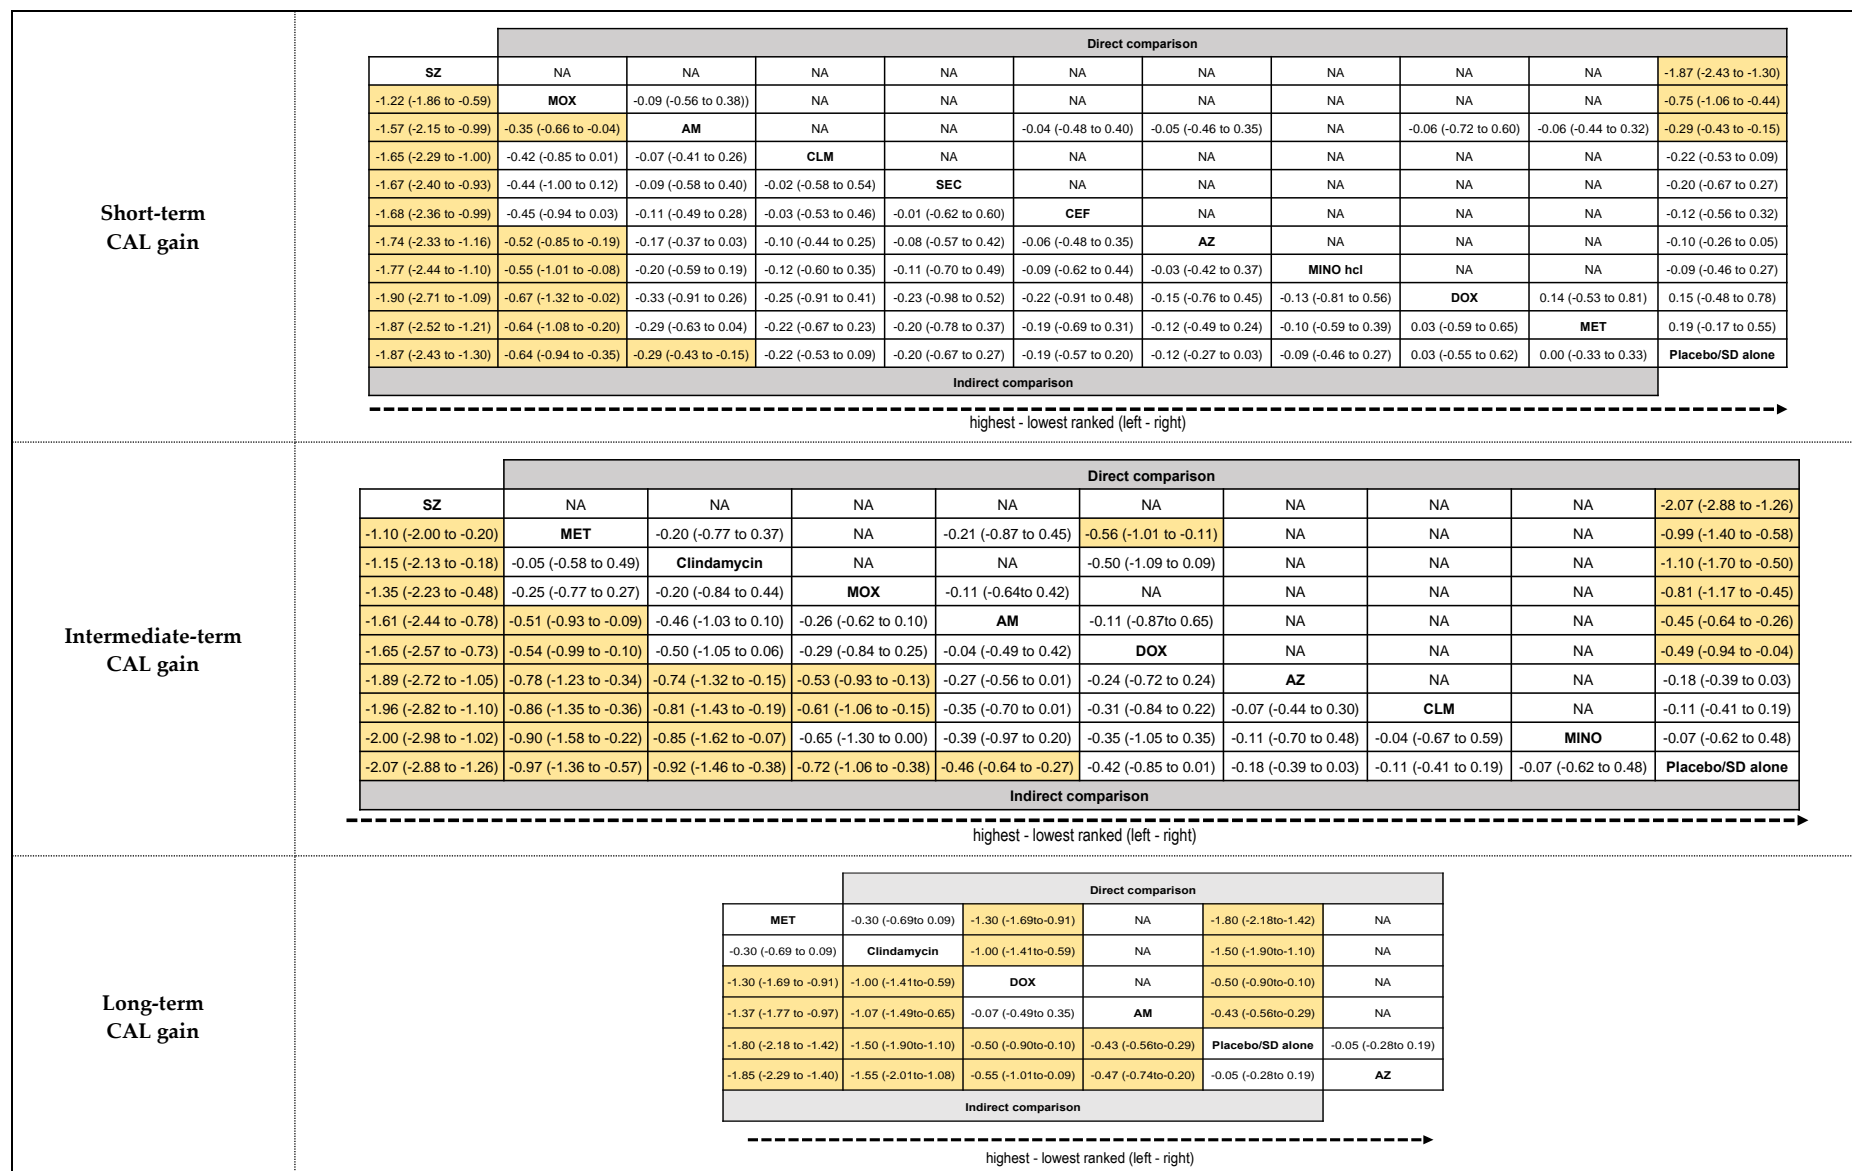

Figure S1: League table of pairwise comparisons in the NMA for CAL gain following the adjunctive used of systemic antibiotics

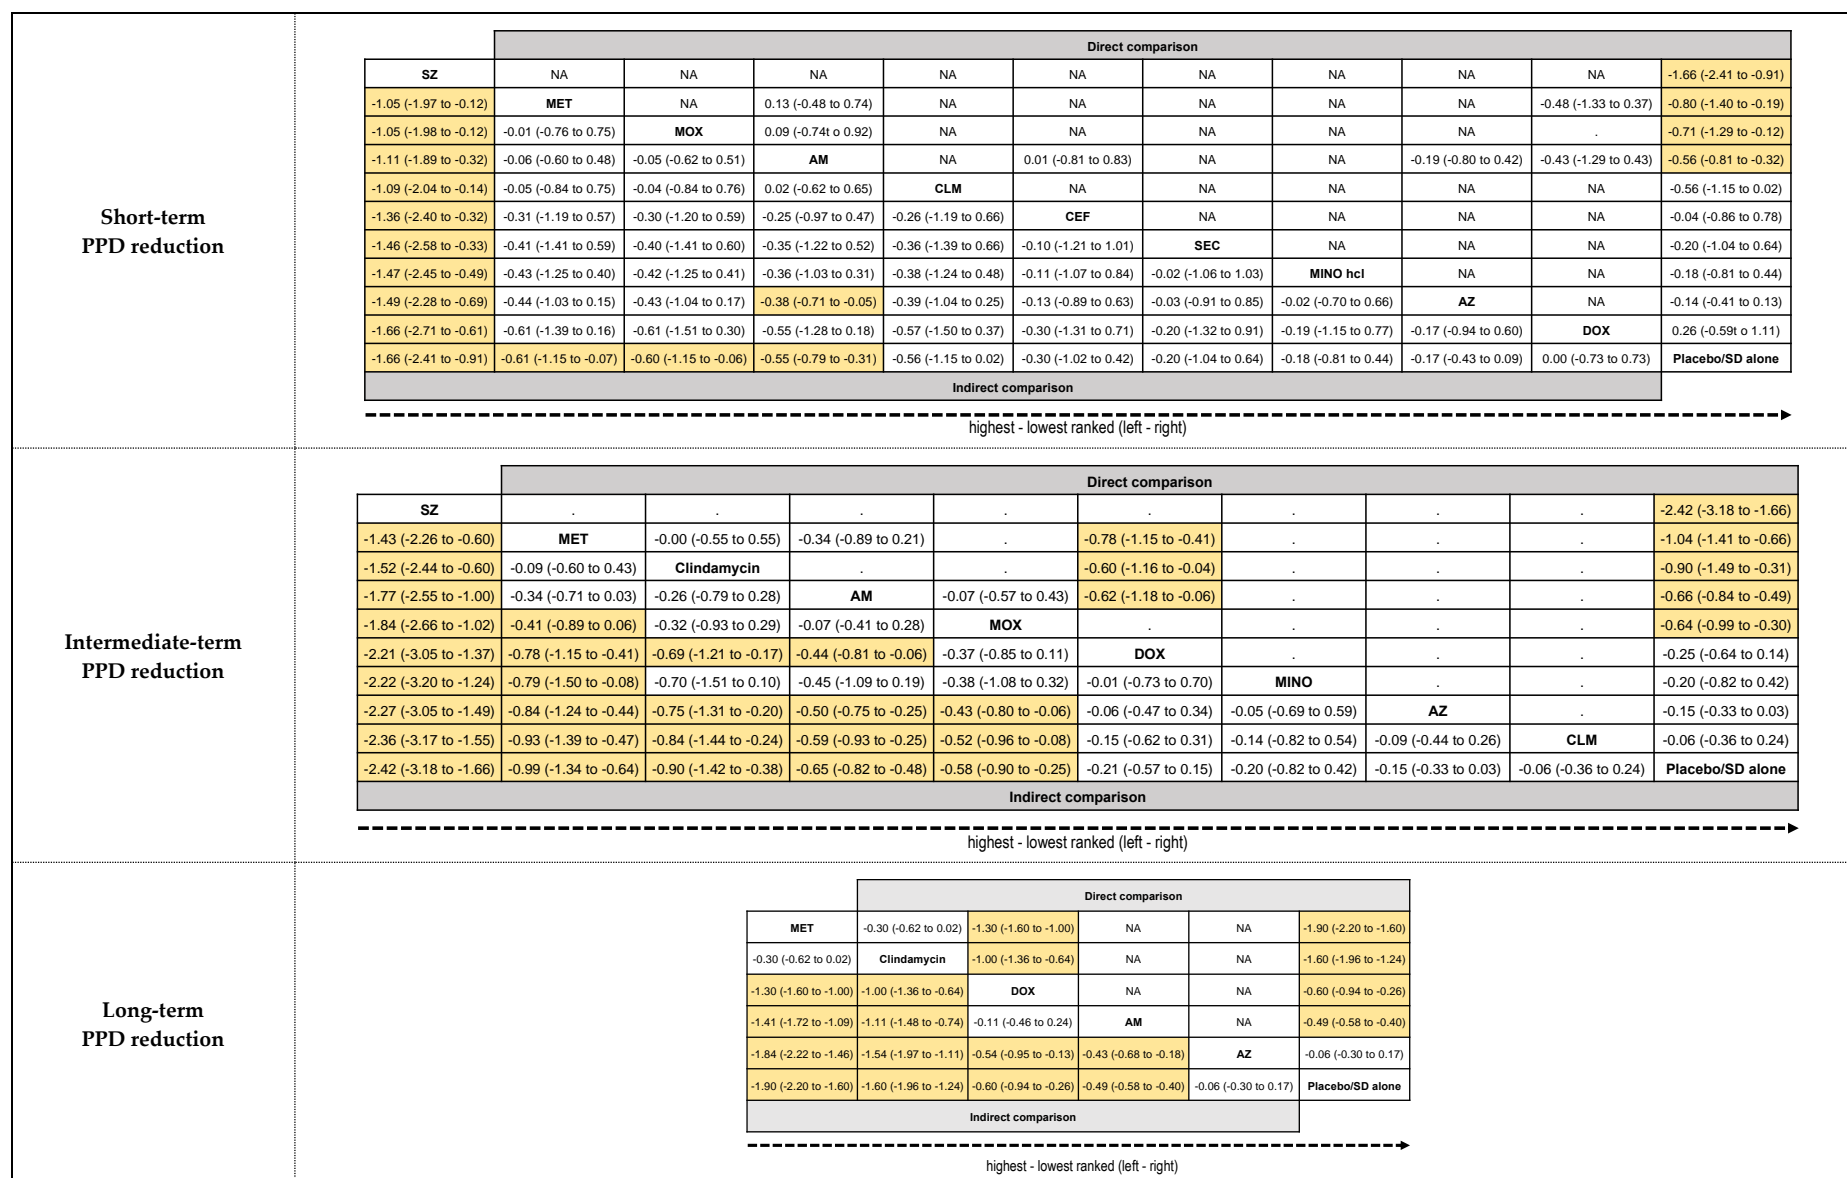

Figure S2: League table of pairwise comparisons in the NMA for PPD reduction following the adjunctive used of systemic antibiotics

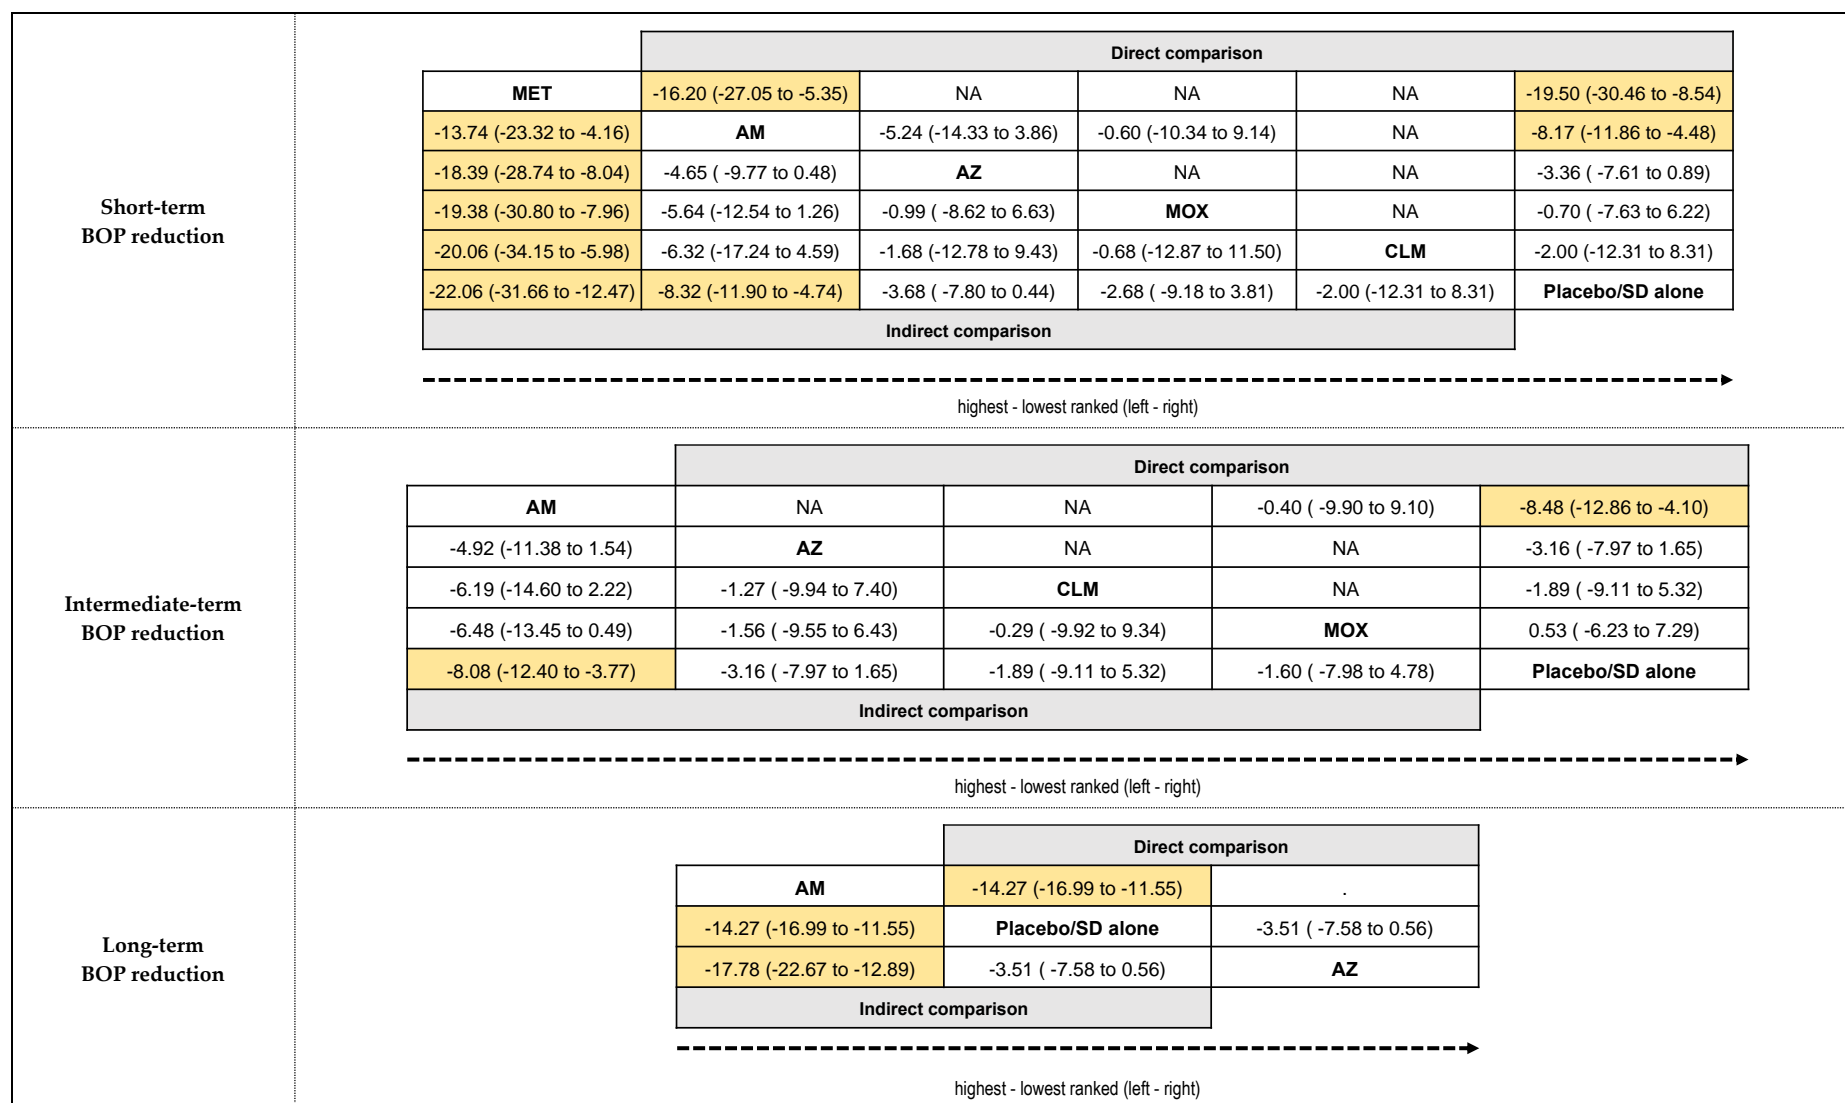

**Figure S3:** League table of pairwise comparisons in the NMA for BOP reduction following the adjunctive used of systemic antibiotics

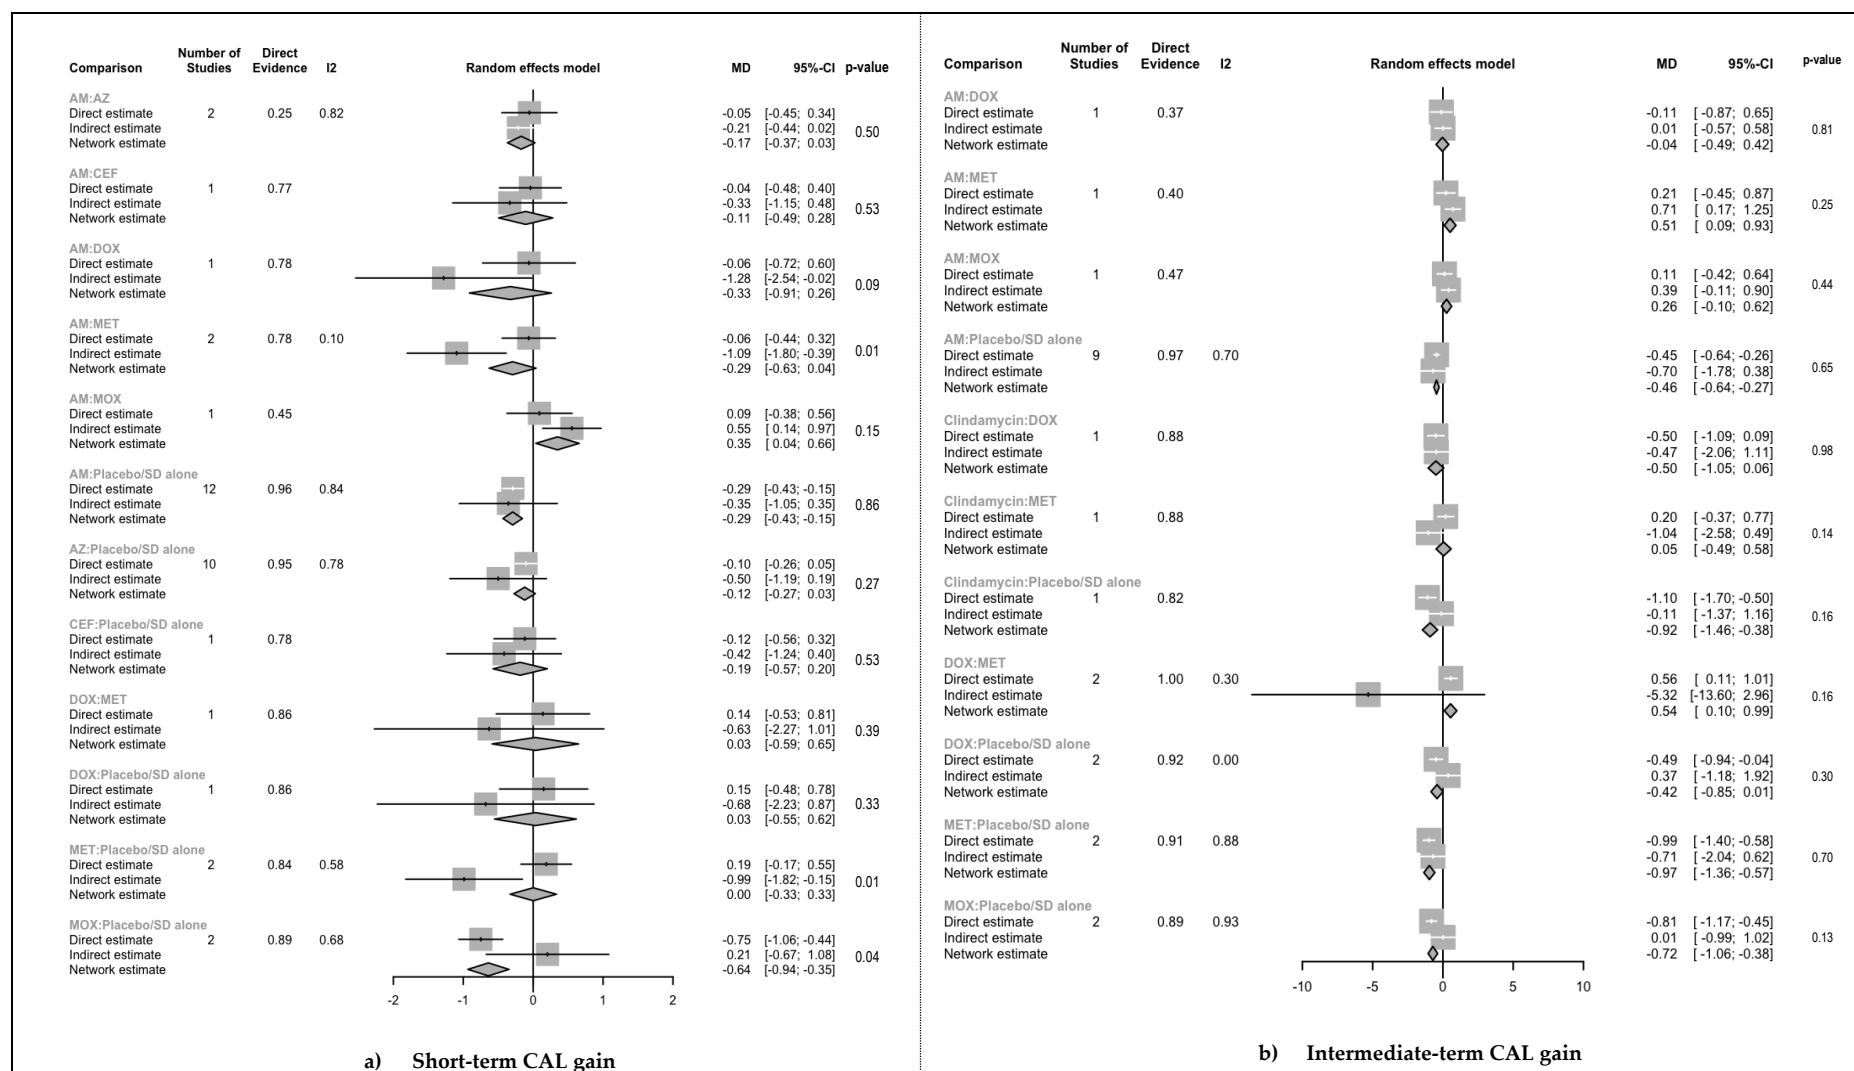

Figure S4. Inconsistency plot for the NMA of CAL gain following adjunctive use of systemic antibiotics

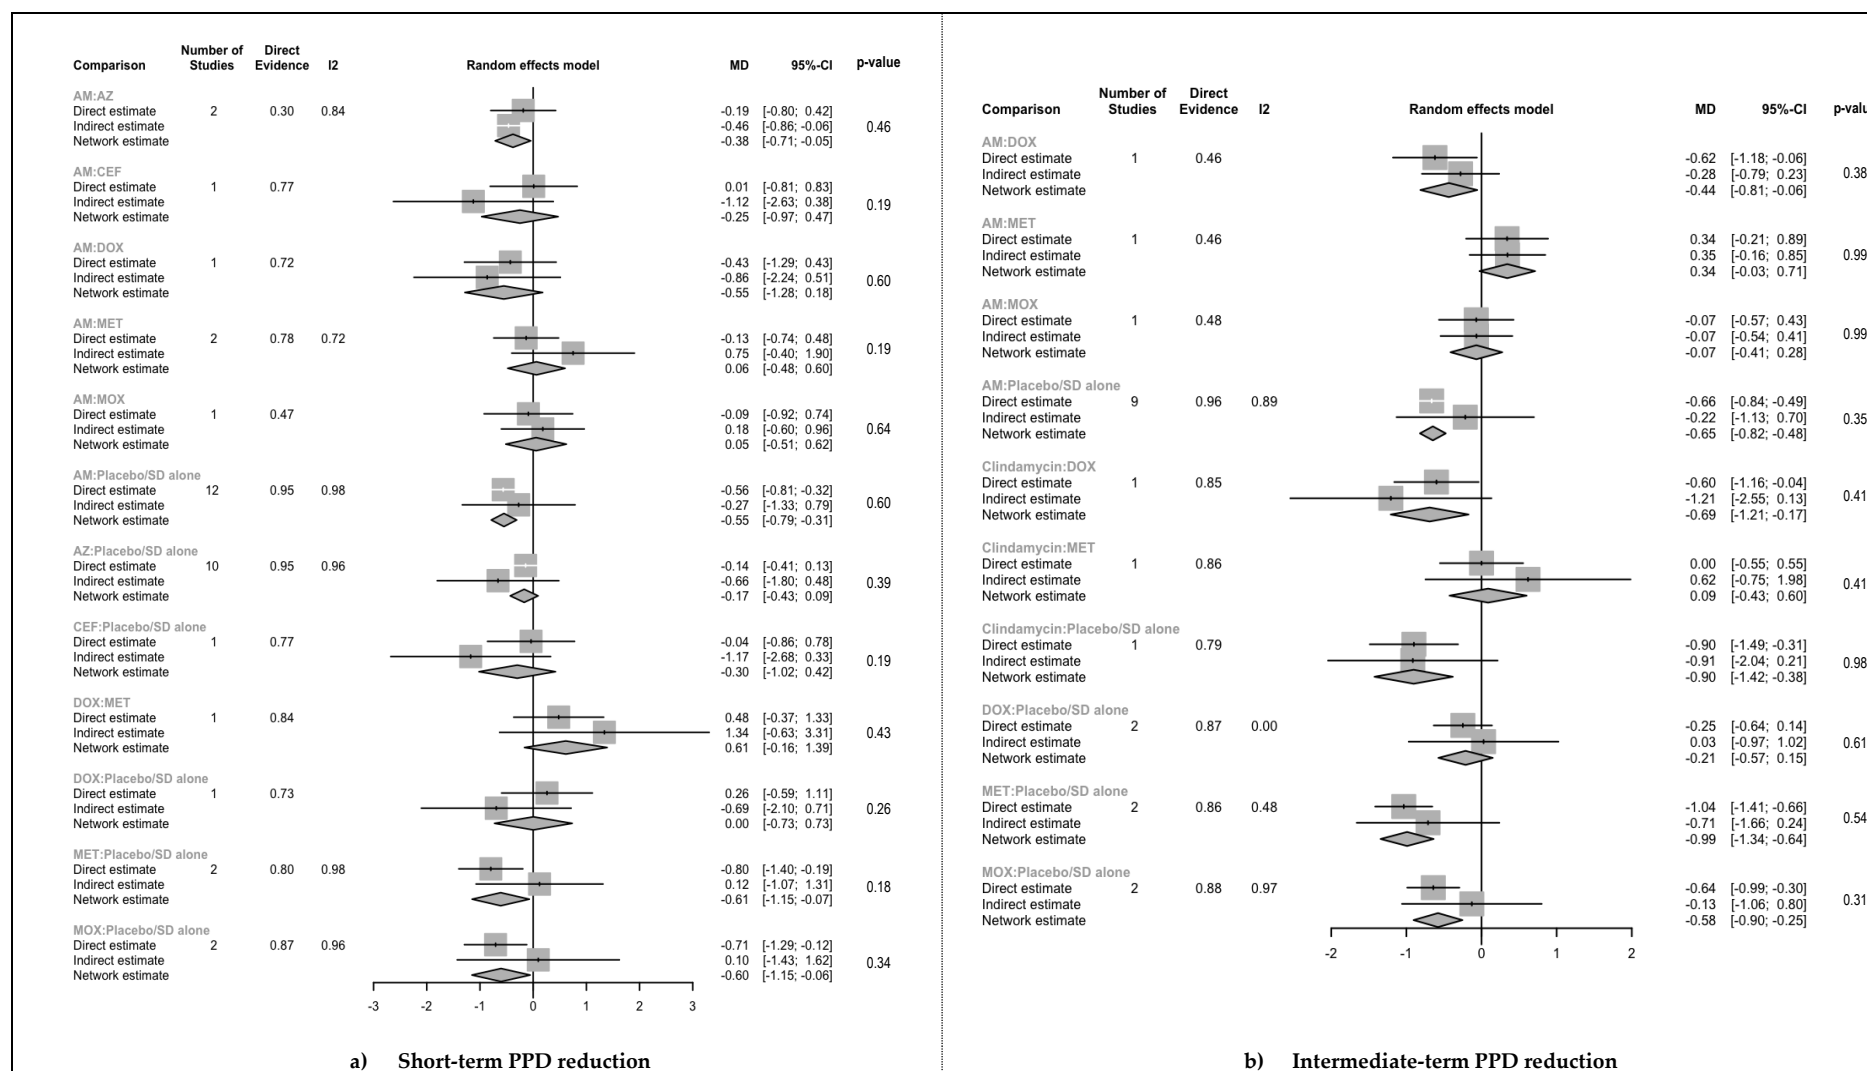

**Figure S5.** Inconsistency plot for the NMA of PPD reduction following adjunctive use of systemic antibiotics

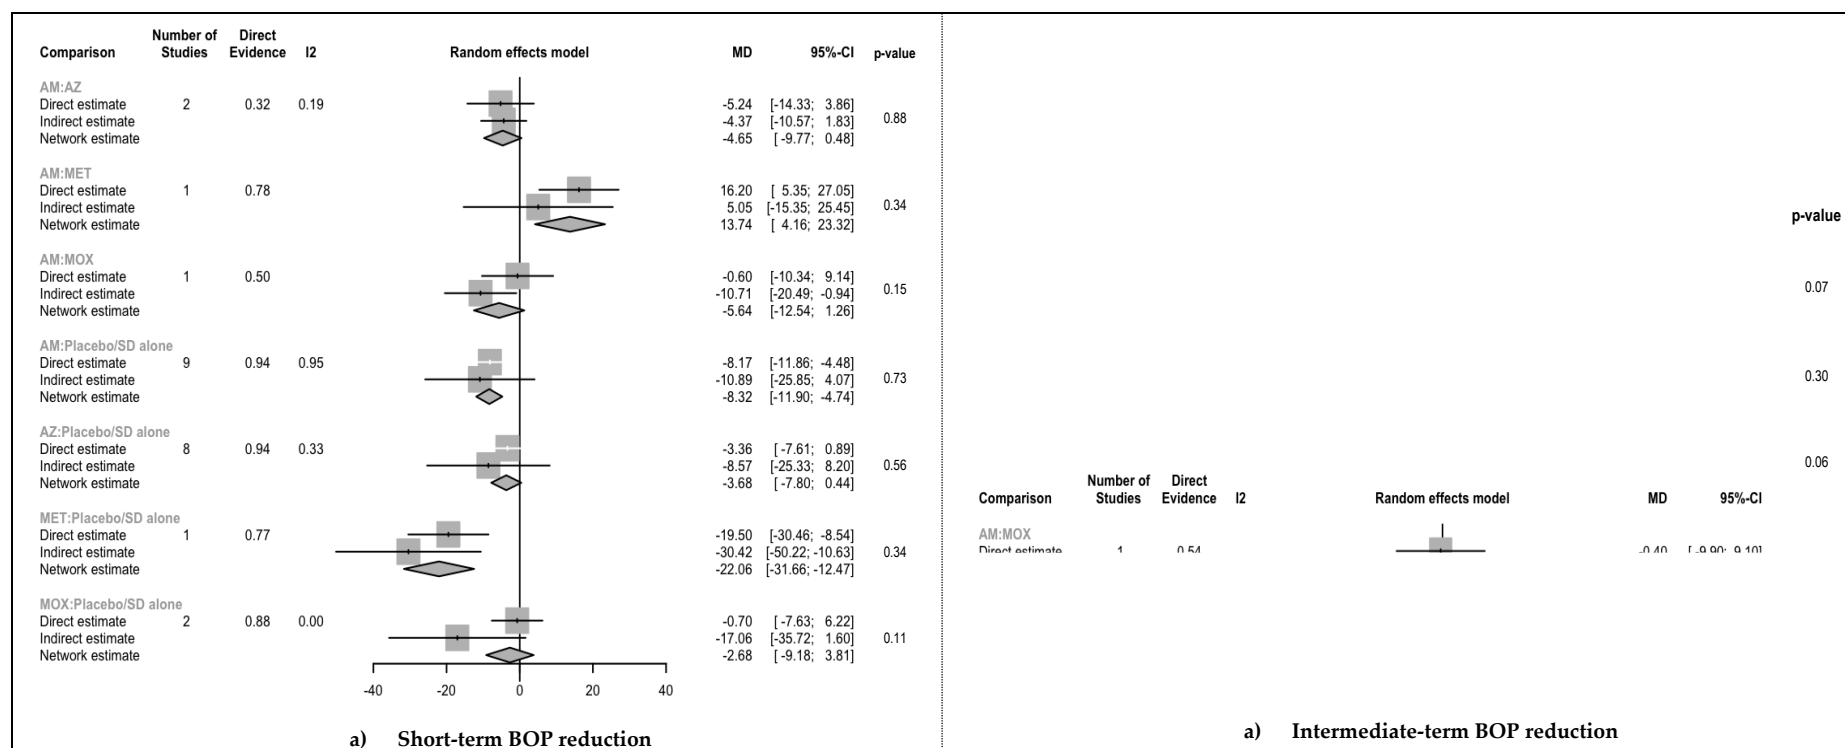

**Figure S6.** Inconsistency plot for the NMA of BOP reduction following adjunctive use of systemic antibiotics



**Table S12.** Subgroup analyses of specific parameters for included studies for CAL gain following adjunctive use of systemic antibiotics

| No.                    | Variables                      | CAL gain       |       |               |         |         |                   |       |               |         |         |                |       |                |         |         |
|------------------------|--------------------------------|----------------|-------|---------------|---------|---------|-------------------|-------|---------------|---------|---------|----------------|-------|----------------|---------|---------|
|                        |                                | Short-term     |       |               |         |         | Intermediate-term |       |               |         |         | Long-term      |       |                |         |         |
|                        |                                | No. of studies | MD    | 95% CI        | I² (%)  | P-value | No. of studies    | MD    | 95% CI        | I² (%)  | P-value | No. of studies | MD    | 95% CI         | I² (%)  | P-value |
| Type of periodontitis  |                                |                |       |               |         |         |                   |       |               |         |         |                |       |                |         |         |
| 1.                     | Aggressive                     | 18             | 0.26  | -0.11 to 0.41 | 90.5    | <0.0001 | 14                | 0.37  | 0.18 to 0.57  | 91.2    | 0.01    | 1              | 0.71  | (0.02 to 1.40) | -       | <0.0001 |
| 2.                     | Chronic                        | 16             | 0.26  | 0.00 to 0.51  | 85.1    |         | 18                | 0.41  | 0.17 to 0.66  | 88.9    |         | 12             | 0.53  | 0.11 to 0.96   | 95.5%   |         |
| 3.                     | Severe/advance                 | 1              | -0.10 | 0.58 to 1.22  | -       |         | 2                 | 0.73  | -0.19 to 1.66 | 81.9    |         |                |       |                |         |         |
| 4.                     | Moderate-to-advance            | 6              | -0.01 | -0.19 to 0.17 | 44.4    |         | 1                 | 0.19  | -0.14 to 0.52 | -       |         | 1              | 0.30  | 0.28 to 0.32   | -       |         |
| 5.                     | Mild-to-moderate               | 2              | 0.90  | -0.29 to 0.09 | 0       |         | 2                 | -0.07 | -0.26 to 0.13 | 88.9    |         |                |       |                |         |         |
| 6.                     | Stage III/IV                   |                |       |               |         |         |                   |       |               |         |         | 1              | -0.26 | -0.50 to -0.12 | -       |         |
| Smokers                |                                |                |       |               |         |         |                   |       |               |         |         |                |       |                |         |         |
| 1.                     | Include smokers                | 13             | 0.03  | -0.07 to -.13 | 24.3    | 0.05    | 14                | 0.15  | 0.03 to 0.28  | 53.6    | 0.00    | 5              | 0.11  | -0.19 to 0.41  | 85.1    | 0.07    |
| 2.                     | Non-smoker                     | 30             | 0.30  | 0.13 to 0.45  | 90.4    |         | 23                | 0.51  | 0.30 to 0.72  | 92.1    |         | 10             | 0.63  | 0.15 to 1.11   | 96.0    |         |
| Antibiotics initiation |                                |                |       |               |         |         |                   |       |               |         |         |                |       |                |         |         |
| 1.                     | After 1 <sup>st</sup> SD       | 9              | -0.03 | -0.18 to 0.11 | 71.6    | 0.00    | 3                 | 0.09  | -0.18 to 0.36 | 83.4    | 0.02    |                |       |                |         | 0.53    |
| 2.                     | After SD                       | 22             | 0.23  | 0.08 to 0.37  | 76.5    |         | 27                | 0.36  | 0.18 to 0.53  | 86.4    |         | 14             | 0.46  | 0.08 to 0.84   | 95.8    |         |
| 3.                     | Before SD                      | 6              | 0.57  | 0.29 to 0.84  | 93.7    |         | 6                 | 0.66  | 0.31 to 1.00  | 93.3    |         | 1              | 0.71  | 0.02 to 1.40   | -       |         |
| 4.                     | Unclear                        | 6              | 0.12  | -0.21 to 0.44 | 84.4    |         | 1                 | 0.07  | -0.19 to 0.33 | -       |         |                |       |                |         |         |
| Dosages                |                                |                |       |               |         |         |                   |       |               |         |         |                |       |                |         |         |
| AMOX+MET               |                                |                |       |               | <0.0001 |         |                   |       |               | <0.0001 |         |                |       |                | <0.0001 |         |
| 1.                     | 375 mg + 250 mg tds for 7 days | 1              | 0.50  | 0.05 to 0.95  |         | -       | 3                 | 0.29  | 0.12 to 0.45  |         | 0       |                |       |                |         |         |
| 2.                     | 500 mg + 200 mg tds for 7 days | 1              | 0.25  | -0.19 to 0.69 |         | -       |                   |       |               |         |         |                |       |                |         |         |
| 3.                     | 500 mg + 250 mg tds for 7 days | 2              | 0.54  | 0.05 to 1.03  |         | 87.8    | 1                 | 0.40  | 0.21 to 0.59  |         | -       | 1              | 0.50  | 0.30 to 0.70   |         | -       |
| 4.                     | 500 mg + 400 mg tds for 7 days | 1              | 0.20  | -0.02 to 0.42 |         | -       | 1                 | 0.20  | 0.18 to 0.62  |         | -       | 2              | 0.30  | 0.28 to 0.32   |         | 0       |
| 5.                     | 500 mg + 500 mg tds for 7 days | 2              | 0.34  | -0.49 to 1.18 |         | 84.7    | 2                 | 0.70  | 0.25 to 1.16  |         | 79.7    |                |       |                |         |         |

| No. | Variables                         | CAL gain       |       |                |                    |         |                   |       |               |                    |         |                |      |               |                    |         |  |  |
|-----|-----------------------------------|----------------|-------|----------------|--------------------|---------|-------------------|-------|---------------|--------------------|---------|----------------|------|---------------|--------------------|---------|--|--|
|     |                                   | Short-term     |       |                |                    |         | Intermediate-term |       |               |                    |         | Long-term      |      |               |                    |         |  |  |
|     |                                   | No. of studies | MD    | 95% CI         | I <sup>2</sup> (%) | P-value | No. of studies    | MD    | 95% CI        | I <sup>2</sup> (%) | P-value | No. of studies | MD   | 95% CI        | I <sup>2</sup> (%) | P-value |  |  |
| 6.  | 500 mg + 250 mg tds for 14 days   | 1              | 0.40  | 0.23 to 0.57   | -                  |         | 1                 | 0.50  | 0.33 to 0.67  | -                  |         | 1              | 0.50 | 0.34 to 0.66  | -                  |         |  |  |
| 7.  | 500 mg + 400 mg tds for 14 days   | 3              | 0.14  | -0.17 to 0.44  | 95.0               |         | 1                 | 0.40  | 0.19 to 0.61  | -                  |         | 1              | 0.50 | 0.30 to 0.70  | -                  |         |  |  |
| 8.  | 500 mg + 500 mg tds for 14 days   | 1              | -0.12 | -0.51 to 0.27  | -                  |         |                   |       |               |                    |         |                |      |               |                    |         |  |  |
| AZ  |                                   |                |       |                |                    |         |                   |       |               |                    |         |                |      |               |                    |         |  |  |
| 9.  | 500 mg od for 3 days              | 9              | 0.14  | -0.06 to 0.33  | 76.9               |         | 7                 | 0.23  | -0.11 to 0.56 | 85.8               |         | 3              | 0.10 | -0.53 to 0.73 | 70.9               |         |  |  |
| 10. | 500 mg qid for 5 days             | 1              | -0.20 | -0.45 to 0.05  | -                  |         | 2                 | -0.10 | -0.29 to 0.09 | 0                  |         | 1              | 0.00 | -0.27 to 0.27 | -                  |         |  |  |
| CEF |                                   |                |       |                |                    |         |                   |       |               |                    |         |                |      |               |                    |         |  |  |
| 11. | 400 mg od for 7 days              | 1              | 0.12  | -0.02 to 0.26  | -                  |         |                   |       |               |                    |         |                |      |               |                    |         |  |  |
| CLM |                                   |                |       |                |                    |         |                   |       |               |                    |         |                |      |               |                    |         |  |  |
| 12. | 500 mg bd for 3 days              | 1              | 0.20  | 0.09 to 0.31   | -                  |         | 2                 | -0.01 | -0.34 to 0.32 | 79.4               |         |                |      |               |                    |         |  |  |
| 13. | 500 mg tds for 7 days             | 1              | 0.24  | 0.12 to 0.36   | -                  |         | 1                 | 0.32  | 0.22 to 0.42  | -                  |         |                |      |               |                    |         |  |  |
| DOX |                                   |                |       |                |                    |         |                   |       |               |                    |         |                |      |               |                    |         |  |  |
| 14. | 200 mg od for 8 days              |                |       |                |                    |         | 1                 | 0.60  | 0.27 to 0.93  | -                  |         | 1              | 0.50 | 0.19 to 0.81  | -                  |         |  |  |
| 15. | 200 mg then 100 mg od for 14 days | 1              | -0.15 | -0.62 to 0.32) | -                  |         | 1                 | 0.33  | -0.17 to 0.83 | -                  |         |                |      |               |                    |         |  |  |
| MET |                                   |                |       |                |                    |         |                   |       |               |                    |         |                |      |               |                    |         |  |  |
| 16. | 400 mg tds for 14 days            | 1              | -0.34 | -0.60 to -0.08 | -                  |         |                   |       |               |                    |         |                |      |               |                    |         |  |  |
| 17. | 500 mg tds for 7 days             | 1              | -0.01 | -0.34 to 0.32  | -                  |         | 1                 | 1.30  | 1.01 to 1.59  | -                  |         |                |      |               |                    |         |  |  |
| 18. | 500 mg bd for 8 days              |                |       |                |                    |         | 1                 | 0.65  | 0.31 to 0.99  | -                  |         | 1              | 1.80 | 1.51 to 2.09  | -                  |         |  |  |
| MOX |                                   |                |       |                |                    |         |                   |       |               |                    |         |                |      |               |                    |         |  |  |
| 19. | 400 mg od for 7 days              | 1              | 0.66  | 0.56 to 0.76   | -                  |         | 1                 | 0.62  | 0.53 to 0.71  | -                  |         |                |      |               |                    |         |  |  |
| 20. | 400 mg qid for 7 days             | 1              | 0.85  | 0.66 to 1.03   | -                  |         | 1                 | 1.02  | 0.83 to 1.21  | -                  |         |                |      |               |                    |         |  |  |

| No. | Variables             | CAL gain       |      |               |        |         |                   |      |              |        |         |                |    |        |        |         |
|-----|-----------------------|----------------|------|---------------|--------|---------|-------------------|------|--------------|--------|---------|----------------|----|--------|--------|---------|
|     |                       | Short-term     |      |               |        |         | Intermediate-term |      |              |        |         | Long-term      |    |        |        |         |
|     |                       | No. of studies | MD   | 95% CI        | I² (%) | P-value | No. of studies    | MD   | 95% CI       | I² (%) | P-value | No. of studies | MD | 95% CI | I² (%) | P-value |
| SZ  |                       |                |      |               |        |         |                   |      |              |        |         |                |    |        |        |         |
| 21. | 300 mg bd for 10 days | 2              | 1.86 | 1.38 to 2.34  |        | 0       | 2                 | 1.86 | 1.38 to 2.33 | 0      |         |                |    |        |        |         |
| SEC |                       |                |      |               |        |         |                   |      |              |        |         |                |    |        |        |         |
| 22. | 1 g of for 30 days    | 1              | 0.20 | -0.02 to 0.41 |        | -       |                   |      |              |        |         |                |    |        |        |         |

**Table S13.** Subgroup analyses of specific parameters for included studies for PPD reduction following adjunctive use of systemic antibiotics

| No.                    | Variables                | PPD reduction  |      |               |         |         |                   |       |               |        |         |                |      |               |        |         |         |
|------------------------|--------------------------|----------------|------|---------------|---------|---------|-------------------|-------|---------------|--------|---------|----------------|------|---------------|--------|---------|---------|
|                        |                          | Short-term     |      |               |         |         | Intermediate-term |       |               |        |         | Long-term      |      |               |        |         |         |
|                        |                          | No. of studies | MD   | 95% CI        | I² (%)  | P-value | No. of studies    | MD    | 95% CI        | I² (%) | P-value | No. of studies | MD   | 95% CI        | I² (%) | P-value |         |
| Type of periodontitis  |                          |                |      |               |         |         |                   |       |               |        |         |                |      |               |        |         |         |
| 1.                     | Aggressive               | 18             | 0.22 | 0.03 to 0.42  | 96.5    | <0.0001 | 14                | 0.42  | 0.15 to 0.70  | 95.8   | 0.00    | 1              | 1.03 | 0.19 to 1.87  | -      | 0.04    |         |
| 2.                     | Chronic                  | 16             | 0.58 | 0.27 to 0.89  | 94.8    |         | 18                | 0.40  | 0.13 to 0.66  | 89.8   |         | 12             | 0.60 | 0.16 to 1.03  | 96.5   |         |         |
| 3.                     | Severe/advance           | 1              | 1.00 | 0.84 to 1.16  | -       |         | 2                 | 1.18  | 0.47 to 1.89  | 81.9   |         |                |      |               |        |         |         |
| 4.                     | Moderate-to-advance      | 6              | 0.09 | -0.18 to 0.37 | 82.6    |         | 1                 | 0.21  | 0.06 to 0.36  | -      |         | 1              | 0.40 | 0.39 to 0.41  | -      |         |         |
| 5.                     | Mild-to-moderate         | 2              | 0.01 | -0.13 to 0.15 | 0       |         | 2                 | -0.03 | -0.25 to 0.19 | 81.4   |         |                |      |               |        |         |         |
| 6.                     | Stage III/IV             |                |      |               |         |         |                   |       |               |        |         | 1              | 0.03 | -0.28 to 0.34 | 0      |         |         |
| Smokers                |                          |                |      |               |         |         |                   |       |               |        |         |                |      |               |        |         |         |
| 1.                     | Include smokers          | 16             | 0.20 | -0.09 to 0.49 | 96.3    | 0.19    | 22                | 0.54  | 0.30 to 0.78  | 94.2   | 0.09    | 10             | 0.68 | 0.19 to 1.17  | 97.0   | 0.14    |         |
| 2.                     | Non-smoker               | 27             | 0.42 | 0.25 to 0.59  | 97.1    |         | 15                | 0.24  | 0.00 to 0.48  | 93.2   |         | 5              | 0.24 | -0.07 to 0.55 | 78.1   |         |         |
| Antibiotics initiation |                          |                |      |               |         |         |                   |       |               |        |         |                |      |               |        |         |         |
| 1.                     | After 1 <sup>st</sup> SD | 9              | 0.52 | 0.07 to 0.98  | 97.5    | 0.24    | 3                 | 0.06  | -0.16 to 0.29 | 85.6   | 0.06    |                |      |               |        | 0.30    |         |
| 2.                     | After SD                 | 22             | 0.23 | 0.07 to 0.40  | 93.7    |         | 27                | 0.44  | 0.21 to 0.66  | 92.8   |         | 14             | 0.54 | 0.16 to 0.92  | 96.5   |         |         |
| 3.                     | Before SD                | 6              | 0.57 | 0.18 to 0.97  | 97.8    |         | 6                 | 0.55  | 0.17 to 0.92  | 96.8   |         | 1              | 1.03 | 0.19 to 1.87  | -      |         |         |
| 4.                     | Unclear                  | 6              | 0.13 | -0.22 to 0.49 | 85.6    |         | 1                 | 0.20  | -0.20 to 0.60 | -      |         |                |      |               |        |         |         |
| Dosages                |                          |                |      |               |         |         |                   |       |               |        |         |                |      |               |        |         |         |
| AMOX+MET               |                          |                |      |               | <0.0001 |         |                   |       |               |        | <0.0001 |                |      |               |        |         | <0.0001 |

| No. | Variables                         | PPD reduction  |       |                |                    |         |                   |       |               |                    |         |                |       |               |                    |         |  |  |
|-----|-----------------------------------|----------------|-------|----------------|--------------------|---------|-------------------|-------|---------------|--------------------|---------|----------------|-------|---------------|--------------------|---------|--|--|
|     |                                   | Short-term     |       |                |                    |         | Intermediate-term |       |               |                    |         | Long-term      |       |               |                    |         |  |  |
|     |                                   | No. of studies | MD    | 95% CI         | I <sup>2</sup> (%) | P-value | No. of studies    | MD    | 95% CI        | I <sup>2</sup> (%) | P-value | No. of studies | MD    | 95% CI        | I <sup>2</sup> (%) | P-value |  |  |
| 1.  | 375 mg + 250 mg tds for 7 days    | 1              | 0.70  | 0.29 to 1.11   | -                  |         | 3                 | 0.82  | 0.12 to 1.53  | 87.9               |         |                |       |               |                    |         |  |  |
| 2.  | 500 mg + 200 mg tds for 7 days    | 1              | 0.27  | -0.16 to 0.70  | -                  |         |                   |       |               |                    |         |                |       |               |                    |         |  |  |
| 3.  | 500 mg + 250 mg tds for 7 days    | 2              | 0.58  | 0.19 to 0.97   | 84.1               |         | 1                 | 0.60  | 0.48 to 0.72  | -                  |         | 1              | 0.50  | 0.38 to 0.62  | -                  |         |  |  |
| 4.  | 500 mg + 400 mg tds for 7 days    | 1              | 0.50  | 0.39 to 0.61   | -                  |         | 1                 | 0.60  | 0.48 to 0.72  | -                  |         |                |       |               |                    |         |  |  |
| 5.  | 500 mg + 500 mg tds for 7 days    | 2              | 0.61  | -0.24 to 1.45  | 96.5               |         | 2                 | 0.97  | 0.78 to 1.16  | 30.9               |         | 2              | 0.49  | 0.30 to 0.69  | 91.3               |         |  |  |
| 6.  | 500 mg + 250 mg tds for 14 days   | 1              | 0.40  | 0.28 to 0.52   | -                  |         | 1                 | 0.40  | 0.28 to 0.52  | -                  |         | 1              | 0.50  | 0.37 to 0.63  | -                  |         |  |  |
| 7.  | 500 mg + 400 mg tds for 14 days   | 3              | 0.71  | -0.29 to 1.70  | 99.2               |         | 1                 | 0.50  | 0.39 to 0.61  | -                  |         | 1              | 0.50  | 0.39 to 0.61  | -                  |         |  |  |
| 8.  | 500 mg + 500 mg tds for 14 days   | 1              | 0.38  | 0.16 to 0.60   | -                  |         |                   |       |               |                    |         |                |       |               |                    |         |  |  |
| AZ  |                                   |                |       |                |                    |         |                   |       |               |                    |         |                |       |               |                    |         |  |  |
| 9.  | 500 mg od for 3 days              | 9              | 0.17  | -0.10 to 0.43  | 96.2               |         | 7                 | 0.22  | -0.05 to 0.48 | 93.0               |         | 3              | 0.39  | -0.25 to 1.02 | 59.6               |         |  |  |
| 10. | 500 mg qid for 5 days             | 1              | -0.10 | -0.45 to 0.25  | -                  |         | 2                 | -0.15 | -0.38 to 0.08 | 0                  |         | 1              | -0.10 | -0.40 to 0.21 | -                  |         |  |  |
| CEF |                                   |                |       |                |                    |         |                   |       |               |                    |         |                |       |               |                    |         |  |  |
| 11. | 400 mg od for 7 days              | 1              | 0.04  | 0.02 to 0.06   | -                  |         |                   |       |               |                    |         |                |       |               |                    |         |  |  |
| CLM |                                   |                |       |                |                    |         |                   |       |               |                    |         |                |       |               |                    |         |  |  |
| 12. | 500 mg bd for 3 days              | 1              | 0.10  | 0.00 to 0.20   | -                  |         | 2                 | -0.05 | -0.40 to 0.30 | 81.4               |         |                |       |               |                    |         |  |  |
| 13. | 500 mg tds for 7 days             | 1              | 1.04  | 0.87 to 1.21   | -                  |         | 1                 | 0.27  | 0.09 to 0.45  | -                  |         |                |       |               |                    |         |  |  |
| DOX |                                   |                |       |                |                    |         |                   |       |               |                    |         |                |       |               |                    |         |  |  |
| 14. | 200 mg od for 8 days              |                |       |                |                    |         | 1                 | 0.30  | 0.00 to 0.60  | -                  |         | 1              | 0.60  | 0.31 to 0.89  | -                  |         |  |  |
| 15. | 200 mg then 100 mg od for 14 days | 1              | -0.26 | -0.50 to -0.02 | -                  |         | 1                 | 0.20  | -0.07 to 0.47 | -                  |         |                |       |               |                    |         |  |  |
| MET |                                   |                |       |                |                    |         |                   |       |               |                    |         |                |       |               |                    |         |  |  |
| 16. | 400 mg tds for 14 days            | 1              | 1.39  | 1.13 to 1.65   | -                  |         |                   |       |               |                    |         |                |       |               |                    |         |  |  |

| No.      | Variables                         | PPD reduction  |      |               |        |         |                   |      |               |        |         |                |      |              |        |         |  |  |
|----------|-----------------------------------|----------------|------|---------------|--------|---------|-------------------|------|---------------|--------|---------|----------------|------|--------------|--------|---------|--|--|
|          |                                   | Short-term     |      |               |        |         | Intermediate-term |      |               |        |         | Long-term      |      |              |        |         |  |  |
|          |                                   | No. of studies | MD   | 95% CI        | I² (%) | P-value | No. of studies    | MD   | 95% CI        | I² (%) | P-value | No. of studies | MD   | 95% CI       | I² (%) | P-value |  |  |
| 17.      | 500 mg tds for 7 days             | 1              | 0.22 | 0.01 to 0.43  | -      |         | 1                 | 1.16 | 0.92 to 1.40  | -      |         |                |      |              |        |         |  |  |
| 18.      | 500 mg bd for 8 days              |                |      |               |        |         | 1                 | 0.90 | 0.62 to 1.18  | -      |         | 1              | 1.90 | 1.66 to 2.14 |        |         |  |  |
| MINO HCl |                                   |                |      |               |        |         |                   |      |               |        |         |                |      |              |        |         |  |  |
| 19.      | 200 mg then 100 mg od for 14 days | 2              | 0.18 | -0.06 to 0.42 | 0      |         | 1                 | 0.20 | -0.20 to 0.60 | -      |         |                |      |              |        |         |  |  |
| MOX      |                                   |                |      |               |        |         |                   |      |               |        |         |                |      |              |        |         |  |  |
| 20.      | 400 mg od for 7 days              | 1              | 0.48 | 0.39 to 0.58  | -      |         | 1                 | 0.35 | -0.26 to 0.44 | -      |         |                |      |              |        |         |  |  |
| 21.      | 400 mg qid for 7 days             | 1              | 0.94 | 0.78 to 1.10  | -      |         | 1                 | 0.96 | 0.79 to 1.13  | -      |         |                |      |              |        |         |  |  |
| SZ       |                                   |                |      |               |        |         |                   |      |               |        |         |                |      |              |        |         |  |  |
| 22.      | 300 mg bd for 10 days             | 2              | 1.62 | 1.15 to 2.08  | 0      |         | 1                 | 2.42 | 1.83 to 1.01  | -      |         |                |      |              |        |         |  |  |
| SEC      |                                   |                |      |               |        |         |                   |      |               |        |         |                |      |              |        |         |  |  |
| 23.      | 1 g of for 30 days                | 1              | 0.18 | -0.06 to 0.42 |        |         |                   |      |               |        |         |                |      |              |        |         |  |  |

**Table S14.** Subgroup analyses of specific parameters for included studies for BOP reduction following adjunctive use of systemic antibiotics

| No.                   | Variables           | BOP reduction  |       |                 |        |         |                   |      |               |        |         |
|-----------------------|---------------------|----------------|-------|-----------------|--------|---------|-------------------|------|---------------|--------|---------|
|                       |                     | Short-term     |       |                 |        |         | Intermediate-term |      |               |        |         |
|                       |                     | No. of studies | MD    | 95% CI          | I² (%) | p-value | No. of studies    | MD   | 95% CI        | I² (%) | p-value |
| Type of periodontitis |                     |                |       |                 |        |         |                   |      |               |        |         |
| 1.                    | Aggressive          | 7              | -1.64 | -2.65 to -0.62  | 55.1   | 0.00    | 7                 | 0.81 | -0.62 to 2.24 | 74.1   | <0.0001 |
| 2.                    | Chronic             | 10             | -6.90 | -13.34 to -0.45 | 94.1   |         | 7                 | 9.07 | 6.38 to 11.76 | 59.7   |         |
| 3.                    | Severe/advance      | 2              | -7.96 | -10.90 to -5.01 | 0      |         | 1                 | 7.55 | 4.50 to 10.60 | -      |         |
| 4.                    | Moderate-to-advance | 6              | -1.67 | -4.58 to 1.24   | 0      |         | 1                 | 0.80 | -4.09 to 5.69 | -      |         |
| 5.                    | Mild-to-moderate    |                |       |                 |        |         |                   |      |               |        |         |
| 6.                    | Stage III/IV        |                |       |                 |        |         |                   |      |               |        |         |
| Smokers               |                     |                |       |                 |        |         |                   |      |               |        |         |
| 1.                    | Include smokers     | 8              | -3.43 | -10.69 to 3.82  | 93.0   | 0.67    | 5                 | 2.55 | 0.29 to 4.82  | 0      | 0.27    |

| No.                    | Variables                       | BOP reduction  |        |                  |        |         |                   |        |                  |        |         |
|------------------------|---------------------------------|----------------|--------|------------------|--------|---------|-------------------|--------|------------------|--------|---------|
|                        |                                 | Short-term     |        |                  |        |         | Intermediate-term |        |                  |        |         |
|                        |                                 | No. of studies | MD     | 95% CI           | I² (%) | p-value | No. of studies    | MD     | 95% CI           | I² (%) | p-value |
| 2.                     | Non-smoker                      | 17             | -5.14  | -7.90 to -2.37   | 92.2   |         | 11                | 4.72   | 1.62 to 7.81     | 94.7   |         |
| Antibiotics initiation |                                 |                |        |                  |        |         |                   |        |                  |        |         |
| 1.                     | After 1 <sup>st</sup> SD        | 6              | -1.72  | -10.89 to 7.45   | 94.9   | 0.00    |                   |        |                  |        | 0.05    |
| 2.                     | After SD                        | 10             | -8.74  | -11.87 to -5.60  | 82.3   |         | 10                | 5.86   | 2.53 to 9.19     | 83.4   |         |
| 3.                     | Before SD                       | 6              | -1.93  | -3.78 to -0.08   | 74.6   |         | 6                 | 1.65   | -0.91 to 4.21    | 87.0   |         |
| 4.                     | Unclear                         | 3              | -3.48  | -13.13 to 6.17   | 44.1   |         |                   |        |                  |        |         |
| Dosages                |                                 |                |        |                  |        |         |                   |        |                  |        |         |
| AMOX+MET               |                                 |                |        |                  |        | <0.0001 |                   |        |                  |        | <0.0001 |
| 2.                     | 500 mg + 200 mg tds for 7 days  | 1              | -6.70  | -20.88 to 7.48   | -      |         |                   |        |                  |        |         |
| 3.                     | 500 mg + 250 mg tds for 7 days  | 2              | -11.24 | -14.28 to -8.20  | 0      |         | 1                 | -8.40  | -11.52 to -5.28  | -      |         |
| 4.                     | 500 mg + 400 mg tds for 7 days  | 1              | -15.40 | -18.44 to -12.36 | -      |         | 1                 | -13.40 | -16.32 to -10.48 | -      |         |
| 5.                     | 500 mg + 500 mg tds for 7 days  | 1              | -1.60  | -2.48 to -0.72   | -      |         | 1                 | -1.50  | -2.36 to 0.64    | -      |         |
| 6.                     | 500 mg + 250 mg tds for 14 days | 1              | -7.40  | -10.28 to -4.52  | -      |         | 1                 | -8.90  | -11.70 to -6.10  | -      |         |
| 7.                     | 500 mg + 400 mg tds for 14 days | 3              | -6.55  | -14.00 to 0.90   | 89.6   |         | 1                 | -10.80 | -13.75 to -7.85  | -      |         |
| AZ                     |                                 |                |        |                  |        |         |                   |        |                  |        |         |
| 9.                     | 500 mg od for 3 days            | 6              | -4.78  | -7.13 to -2.44   | 28.6   |         | 4                 | -4.21  | -7.61 to -0.81   | 55.1   |         |
| 10.                    | 500 mg qid for 5 days           | 2              | -0.04  | -6.86 to 6.79    | 16.9   |         | 2                 | -0.55  | -7.84 to 6.74    | 0      |         |
| CLM                    |                                 |                |        |                  |        |         |                   |        |                  |        |         |
| 12.                    | 500 mg bd for 3 days            | 1              | -2.00  | -5.58 to 1.58    |        |         | 1                 | 0.00   | -4.18 to 4.18    |        |         |
| 13.                    | 500 mg tds for 7 days           |                |        |                  |        |         | 1                 | -3.70  | -7.28 to -0.12   |        |         |
| MET                    |                                 |                |        |                  |        |         |                   |        |                  |        |         |
| 16.                    | 400 mg tds for 14 days          | 1              | -19.5  | -24.67 to 14.34  | -      |         |                   |        |                  |        |         |
| MOX                    |                                 |                |        |                  |        |         |                   |        |                  |        |         |
| 20.                    | 400 mg od for 7 days            | 1              | -0.40  | -2.25 to 1.45    | -      |         | 1                 | 2.20   | 0.35 to 4.05     | -      |         |

| No. | Variables             | BOP reduction  |       |               |                    |         |                   |       |               |                    |         |
|-----|-----------------------|----------------|-------|---------------|--------------------|---------|-------------------|-------|---------------|--------------------|---------|
|     |                       | Short-term     |       |               |                    |         | Intermediate-term |       |               |                    |         |
|     |                       | No. of studies | MD    | 95% CI        | I <sup>2</sup> (%) | p-value | No. of studies    | MD    | 95% CI        | I <sup>2</sup> (%) | p-value |
| 21. | 400 mg qid for 7 days | 1              | -1.00 | -2.20 to 0.20 |                    |         | 1                 | -1.10 | -2.28 to 0.08 | -                  |         |

**Table S15.** Sensitivity analyses for short-term CAL gain following adjunctive use of systemic antibiotics

| Interventions | All studies |       |       |                |         |                    | Studies without outliers and influential cases |     |       |                |         |                    | Studies without imputed data |     |       |                |         |                    | Studies without high ROB |     |       |                |         |                    |      |  |
|---------------|-------------|-------|-------|----------------|---------|--------------------|------------------------------------------------|-----|-------|----------------|---------|--------------------|------------------------------|-----|-------|----------------|---------|--------------------|--------------------------|-----|-------|----------------|---------|--------------------|------|--|
|               | k           | o     | MD    | 95% CI         | p-score | I <sup>2</sup> (%) | k                                              | o   | MD    | 95% CI         | p-score | I <sup>2</sup> (%) | k                            | o   | MD    | 95% CI         | P-score | I <sup>2</sup> (%) | k                        | o   | MD    | 95% CI         | p-score | I <sup>2</sup> (%) |      |  |
| SZ            | 28          | 1,171 | -1.87 | -2.43 to -1.30 | 1.00    | 78.0               | 22                                             | 907 | -1.86 | -2.35 to -1.36 | 1.00    | 42.4               | 23                           | 993 | -1.87 | -2.44 to -1.29 | 1.00    | 80.3               | 14                       | 642 |       |                |         |                    | 82.2 |  |
| MOX           |             |       | -0.64 | -0.94 to -0.35 | 0.88    |                    |                                                |     | -0.66 | -0.87 to -0.45 | 0.87    |                    |                              |     | -0.65 | -0.96 to -0.34 | 0.87    |                    |                          |     | -0.66 | -0.93 to -0.38 | 0.99    |                    |      |  |
| AMOX+MET      |             |       | -0.29 | -0.43 to -0.15 | 0.66    |                    |                                                |     | -0.26 | -0.37 to -0.15 | 0.62    |                    |                              |     | -0.33 | -0.48 to -0.17 | 0.66    |                    |                          |     | -0.35 | -0.50 to 0.20  | 0.78    |                    |      |  |
| CLM           |             |       | -0.22 | -0.53 to 0.09  | 0.54    |                    |                                                |     | -0.22 | -0.37 to -0.06 | 0.53    |                    |                              |     | -0.22 | -0.55 to 0.11  | 0.51    |                    |                          |     | -0.22 | -0.50 to 0.06  | 0.60    |                    |      |  |
| SEC           |             |       | -0.20 | -0.67 to 0.27  | 0.49    |                    |                                                |     | -0.20 | -0.48 to 0.08  | 0.47    |                    |                              |     | -0.20 | -0.70 to 0.30  | 0.47    |                    |                          |     |       |                |         |                    |      |  |
| CEF           |             |       | -0.19 | -0.57 to 0.20  | 0.48    |                    |                                                |     | -0.17 | -0.38 to 0.04  | 0.42    |                    |                              |     | -0.20 | -0.62 to 0.21  | 0.48    |                    |                          |     | -0.21 | -0.57 to 0.15  | 0.59    |                    |      |  |
| AZ            |             |       | -0.12 | -0.27 to 0.03  | 0.40    |                    |                                                |     | -0.09 | -0.19 to 0.02  | 0.25    |                    |                              |     | -0.06 | -0.26 to 0.14  | 0.30    |                    |                          |     | 0.20  | -0.26 to 0.66  | 0.13    |                    |      |  |
| MINO HCl      |             |       | -0.09 | -0.46 to 0.27  | 0.36    |                    |                                                |     | -0.09 | -0.34 to 0.15  | 0.28    |                    |                              |     |       |                |         |                    |                          |     | -0.09 | -0.44 to 0.25  | 0.43    |                    |      |  |
| DOX           |             |       | 0.03  | -0.55 to 0.62  | 0.25    |                    |                                                |     |       |                |         |                    |                              |     | 0.02  | -0.58 to 0.62  | 0.26    |                    |                          |     |       |                |         |                    |      |  |
| MET           |             |       | 0.00  | -0.33 to 0.33  | 0.23    |                    |                                                |     |       |                |         |                    |                              |     | -0.02 | -0.36 to 0.33  | 0.25    |                    |                          |     | 0.11  | -0.31 to 0.53  | 0.20    |                    |      |  |
| SD alone      |             |       | 0.00  |                | 0.19    |                    |                                                |     | 0.00  |                | 0.05    |                    |                              |     | 0.00  |                | 0.19    |                    |                          |     | 0.00  |                | 0.28    |                    |      |  |

**Table S16.** Sensitivity analyses for intermediate-term CAL gain following adjunctive use of systemic antibiotics

| Interventions | All studies |     |           |                       |         |                    | Studies without outliers and influential cases |     |           |                       |         |                    | Studies without imputed data |     |           |                       |         |                    | Studies without high ROB |     |           |                       |         |                    |  |  |  |
|---------------|-------------|-----|-----------|-----------------------|---------|--------------------|------------------------------------------------|-----|-----------|-----------------------|---------|--------------------|------------------------------|-----|-----------|-----------------------|---------|--------------------|--------------------------|-----|-----------|-----------------------|---------|--------------------|--|--|--|
|               | k           | o   | MD        | 95% CI                | P-score | I <sup>2</sup> (%) | k                                              | o   | MD        | 95% CI                | P-score | I <sup>2</sup> (%) | k                            | o   | MD        | 95% CI                | P-score | I <sup>2</sup> (%) | k                        | o   | MD        | 95% CI                | P-score | I <sup>2</sup> (%) |  |  |  |
| SZ            | 25          | 956 | -<br>2.07 | -2.88<br>to -<br>1.26 | 1.00    | 81.5%              | 21                                             | 807 | -<br>2.07 | -2.71<br>to -<br>1.43 | 1.00    | 1.0                | 22                           | 846 | -<br>2.07 | -2.89<br>to -<br>1.25 | 1.00    | 82.6               | 14                       | 551 |           |                       |         | 81.1               |  |  |  |
| MET           |             |     | -<br>0.97 | -1.36<br>to -<br>0.57 | 0.82    |                    |                                                |     | -<br>1.30 | -1.59<br>to -<br>1.01 | 0.88    |                    |                              |     | -<br>0.96 | -1.37<br>to -<br>0.56 | 0.80    |                    |                          |     | -<br>1.30 | -1.80<br>to -<br>0.57 | 0.97    |                    |  |  |  |
| Clindamycin   |             |     | -<br>0.92 | -1.46<br>to -<br>0.38 | 0.78    |                    |                                                |     | -<br>1.10 | -1.45<br>to -<br>0.75 | 0.79    |                    |                              |     | -<br>0.92 | -1.48<br>to -<br>0.36 | 0.76    |                    |                          |     | -<br>1.10 | -1.63<br>to -<br>0.57 | 0.88    |                    |  |  |  |
| MOX           |             |     | -<br>0.72 | -1.05<br>to -<br>0.38 | 0.69    |                    |                                                |     | -<br>0.62 | -0.72<br>to -<br>0.52 | 0.62    |                    |                              |     | -<br>0.72 | -1.07<br>to -<br>0.36 | 0.65    |                    |                          |     | -<br>0.73 | -1.02<br>to -<br>0.44 | 0.71    |                    |  |  |  |
| AMOX+MET      |             |     | -<br>0.46 | -0.64<br>to -<br>0.27 | 0.51    |                    |                                                |     | -<br>0.39 | -0.48<br>to -<br>0.31 | 0.45    |                    |                              |     | -<br>0.46 | -0.65<br>to -<br>0.26 | 0.46    |                    |                          |     | -<br>0.51 | -0.71<br>to -<br>0.31 | 0.55    |                    |  |  |  |
| DOX           |             |     | -<br>0.42 | -0.85<br>to<br>0.01   | 0.47    |                    |                                                |     | -<br>0.60 | -0.93<br>to -<br>0.27 | 0.59    |                    |                              |     | -<br>0.42 | -0.87<br>to<br>0.02   | 0.42    |                    |                          |     | -<br>0.60 | -1.12<br>to -<br>0.08 | 0.61    |                    |  |  |  |
| AZ            |             |     | -<br>0.15 | -0.34<br>to<br>0.05   | 0.25    |                    |                                                |     | -<br>0.06 | -0.15<br>to<br>0.04   | 0.15    |                    |                              |     | -<br>0.12 | -0.36<br>to<br>0.11   | 0.19    |                    |                          |     | 0.09      | -0.24<br>to<br>0.42   | 0.10    |                    |  |  |  |
| CLM           |             |     | -<br>0.11 | -0.41<br>to -<br>.19  | 0.21    |                    |                                                |     | -<br>0.30 | -0.39<br>to -<br>0.20 | 0.34    |                    |                              |     | -<br>0.11 | -0.42<br>to<br>0.20   | 0.18    |                    |                          |     | -<br>0.11 | -0.37<br>to<br>0.14   | 0.28    |                    |  |  |  |
| MINO HCl      |             |     | -<br>0.07 | -0.62<br>to<br>0.48   | 0.19    |                    |                                                |     | -<br>0.07 | -0.33<br>to<br>0.19   | 0.15    |                    |                              |     |           |                       |         |                    |                          |     | -<br>0.07 | -0.55<br>to<br>0.41   | 0.24    |                    |  |  |  |
| SD alone      |             |     | 0.00      |                       | 0.08    |                    |                                                |     | 0.00      |                       | 0.05    |                    |                              |     | 0.00      |                       | 0.05    |                    |                          |     | 0.00      |                       | 0.16    |                    |  |  |  |



**Table S17.** Sensitivity analyses for long-term CAL gain following adjunctive use of systemic antibiotics

| Interventions | All studies |     |      |                |         |                    | Studies without outliers and influential cases |     |      |                |         |                    | Studies without imputed data |     |      |                |         |                    | Studies without high ROB |     |      |                |         |                    |
|---------------|-------------|-----|------|----------------|---------|--------------------|------------------------------------------------|-----|------|----------------|---------|--------------------|------------------------------|-----|------|----------------|---------|--------------------|--------------------------|-----|------|----------------|---------|--------------------|
|               | k           | o   | MD   | 95% CI         | p-score | I <sup>2</sup> (%) | k                                              | o   | MD   | 95% CI         | p-score | I <sup>2</sup> (%) | k                            | o   | MD   | 95% CI         | p-score | I <sup>2</sup> (%) | k                        | o   | MD   | 95% CI         | p-score | I <sup>2</sup> (%) |
| MET           | 10          | 866 | -    | -2.18 to -1.42 | 0.99    | 67.5               | 6                                              | 710 | -    | -2.09 to -1.51 | 0.99    | 0                  | 8                            | 804 | -    | -2.15 to -1.45 | 0.99    | 64.2               | 7                        | 298 | -    | -2.09 to -1.51 | 0.99    | 0                  |
| Clindamycin   |             |     | -    | -1.90 to -1.10 | 0.81    |                    |                                                |     | -    | -1.81 to -1.19 | 0.81    |                    |                              |     | -    | -1.87 to -0.13 | 0.81    |                    |                          |     | -    | -1.81 to -1.19 | 0.81    |                    |
| DOX           |             |     | -    | -0.90 to -0.10 | 0.52    |                    |                                                |     | -    | -0.81 to -0.19 | 0.58    |                    |                              |     | -    | -0.87 to -0.13 | 0.53    |                    |                          |     | -    | -0.81 to -0.19 | 0.51    |                    |
| AMOX+MET      |             |     | -    | -0.56 to -0.29 | 0.47    |                    |                                                |     | -    | 0.32 to -0.28  | 0.42    |                    |                              |     | -    | -0.54 to -0.31 | 0.47    |                    |                          |     | -    | -0.58 to -0.39 | 0.49    |                    |
| SD alone      |             |     | 0.00 |                | 0.13    |                    |                                                |     | 0.00 |                | 0.19    |                    |                              |     | 0.00 |                | 0.10    |                    |                          |     | 0.00 |                | 0.10    |                    |
| AZ            |             |     | 0.05 | -0.19 to 0.28  | 0.07    |                    |                                                |     | 0.14 | -0.04 to 0.32  | 0.01    |                    |                              |     | 0.00 | -0.32 to 0.32  | 0.11    |                    |                          |     | 0.00 | -0.26 to 0.26  | 0.10    |                    |

**Table S18.** Sensitivity analyses for short-term PPD reduction following adjunctive use of systemic antibiotics

| Interventions | All studies |       |           |                       |         |                    | Studies without outliers and influential cases |     |           |                       |         |                    | Studies without imputed data |     |           |                       |         |                    | Studies without high ROB |     |           |                       |         |                    |
|---------------|-------------|-------|-----------|-----------------------|---------|--------------------|------------------------------------------------|-----|-----------|-----------------------|---------|--------------------|------------------------------|-----|-----------|-----------------------|---------|--------------------|--------------------------|-----|-----------|-----------------------|---------|--------------------|
|               | k           | o     | MD        | 95% CI                | p-score | I <sup>2</sup> (%) | k                                              | o   | MD        | 95% CI                | p-score | I <sup>2</sup> (%) | k                            | o   | MD        | 95% CI                | p-score | I <sup>2</sup> (%) | k                        | o   | MD        | 95% CI                | p-score | I <sup>2</sup> (%) |
| SZ            | 28          | 1,171 | -<br>1.66 | -2.41<br>to -<br>0.91 | 0.99    | 97.0               | 21                                             | 866 | -<br>1.62 | -2.12<br>to -<br>1.12 | 1.00    | 66.2               | 23                           | 993 | -<br>1.66 | -2.44<br>to -<br>0.88 | 0.99    | 97.3               | 13                       | 552 |           |                       |         | 96.5               |
| MET           |             |       | -<br>0.51 | -1.15<br>to -<br>0.07 | 0.69    |                    |                                                |     | -<br>0.33 | -0.62<br>to -<br>0.04 | 0.63    |                    |                              |     | -<br>0.63 | -1.20<br>to -<br>0.06 | 0.67    |                    |                          |     | -<br>0.91 | -1.63<br>to -<br>0.20 | 0.85    |                    |
| MOX           |             |       | -<br>0.60 | -1.15<br>to -<br>0.06 | 0.68    |                    |                                                |     | -<br>0.48 | -0.75<br>to -<br>0.21 | 0.80    |                    |                              |     | -<br>0.61 | -1.19<br>to -<br>0.04 | 0.65    |                    |                          |     | -<br>0.65 | -1.16<br>to -<br>0.14 | 0.68    |                    |
| AMOX+MET      |             |       | -<br>0.55 | -0.79<br>to -<br>0.31 | 0.66    |                    |                                                |     | -<br>0.41 | -0.52<br>to -<br>0.30 | 0.76    |                    |                              |     | -<br>0.59 | -0.85<br>to -<br>0.32 | 0.65    |                    |                          |     | -<br>0.73 | -1.02<br>to -<br>0.44 | 0.75    |                    |
| CLM           |             |       | -<br>0.56 | -1.15<br>to<br>0.02   | 0.65    |                    |                                                |     | -<br>0.10 | -0.37<br>to<br>0.17   | 0.31    |                    |                              |     | -<br>0.56 | -1.19<br>to<br>0.06   | 0.61    |                    |                          |     | -<br>0.56 | -1.11<br>to -<br>0.02 | 0.61    |                    |
| CEF           |             |       | -<br>0.30 | -1.02<br>to<br>0.42   | 0.43    |                    |                                                |     |           |                       |         |                    |                              |     | -<br>0.32 | -1.08<br>to<br>0.44   | 0.42    |                    |                          |     |           |                       |         |                    |
| SEC           |             |       | -<br>0.20 | -1.04<br>to<br>0.64   | 0.37    |                    |                                                |     | -<br>0.20 | -0.52<br>to<br>0.12   | 0.45    |                    |                              |     | -<br>0.20 | -1.09<br>to<br>0.69   | 0.35    |                    |                          |     |           |                       |         |                    |
| MINO HCl      |             |       | -<br>0.18 | -0.81<br>to<br>0.44   | 0.34    |                    |                                                |     | -<br>0.18 | -0.48<br>to<br>0.11   | 0.43    |                    |                              |     |           |                       |         |                    |                          |     | -<br>0.18 | -0.77<br>to<br>0.40   | 0.31    |                    |
| AZ            |             |       | -<br>0.17 | -0.43<br>to<br>0.09   | 0.32    |                    |                                                |     | -<br>0.18 | -0.30<br>to -<br>0.06 | 0.42    |                    |                              |     | -<br>0.18 | -0.51<br>to<br>0.16   | 0.30    |                    |                          |     | 0.10      | -0.73<br>to<br>0.93   | 0.15    |                    |
| DOX           |             |       | 0.00      | -0.73<br>to<br>0.73   | 0.22    |                    |                                                |     | 0.15      | -0.16<br>to<br>0.47   | 0.05    |                    |                              |     | -<br>0.01 | -0.79<br>to<br>0.76   | 0.21    |                    |                          |     |           |                       |         |                    |
| SD alone      |             |       | 0.00      |                       | 0.15    |                    |                                                |     | 0.00      |                       | 0.14    |                    |                              |     | 0.00      |                       | 0.14    |                    |                          |     | 0.00      |                       | 0.15    |                    |

**Table S19.** Sensitivity analyses for intermediate-term PPD reduction following adjunctive use of systemic antibiotics

| Interventions | All studies |     |           |                       |         |                    | Studies without outliers and influential cases |     |           |                       |         |                    | Studies without imputed data |     |           |                       |         |                    | Studies without high ROB |     |           |                       |         |                    |
|---------------|-------------|-----|-----------|-----------------------|---------|--------------------|------------------------------------------------|-----|-----------|-----------------------|---------|--------------------|------------------------------|-----|-----------|-----------------------|---------|--------------------|--------------------------|-----|-----------|-----------------------|---------|--------------------|
|               | k           | o   | MD        | 95% CI                | p-score | I <sup>2</sup> (%) | k                                              | o   | MD        | 95% CI                | p-score | I <sup>2</sup> (%) | k                            | o   | MD        | 95% CI                | p-score | I <sup>2</sup> (%) | k                        | o   | MD        | 95% CI                | p-score | I <sup>2</sup> (%) |
| SZ            | 25          | 956 | -<br>2.42 | -3.18<br>to -<br>1.66 | 1.00    | 89.4               | 18                                             | 692 |           |                       |         | 70.6               | 22                           | 846 | -<br>2.42 | -3.20<br>to -<br>1.64 | 1.00    | 90.2               | 14                       | 551 |           |                       |         | 87.4               |
| MET           |             |     | -<br>0.99 | -1.34<br>to -<br>0.64 | 0.84    |                    |                                                |     | -<br>0.90 | -1.26<br>to -<br>0.54 | 0.93    |                    |                              |     | -<br>0.99 | -1.36<br>to -<br>0.62 | 0.82    |                    |                          |     | -<br>0.90 | -1.39<br>to -<br>0.41 | 0.90    |                    |
| Clindamycin   |             |     | -<br>0.90 | -1.42<br>to -<br>0.38 | 0.78    |                    |                                                |     | -<br>0.90 | -1.32<br>to -<br>0.48 | 0.93    |                    |                              |     | -<br>0.90 | -1.45<br>to -<br>0.36 | 0.75    |                    |                          |     | -<br>0.90 | -1.43<br>to -<br>0.37 | 0.90    |                    |
| AMOX+MET      |             |     | -<br>0.65 | -0.82<br>to -<br>0.48 | 0.64    |                    |                                                |     | -<br>0.50 | -0.61<br>to -<br>0.39 | 0.70    |                    |                              |     | -<br>0.65 | -0.84<br>to -<br>0.47 | 0.61    |                    |                          |     | -<br>0.60 | -0.78<br>to -<br>0.41 | 0.70    |                    |
| MOX           |             |     | -<br>0.58 | -0.90<br>to -<br>0.25 | 0.59    |                    |                                                |     | -<br>0.35 | -0.60<br>to -<br>0.10 | 0.53    |                    |                              |     | -<br>0.58 | -0.93<br>to -<br>0.23 | 0.56    |                    |                          |     | -<br>0.56 | -0.84<br>to -<br>0.28 | 0.67    |                    |
| DOX           |             |     | -<br>0.21 | -0.57<br>to<br>0.15   | 0.31    |                    |                                                |     | -<br>0.30 | -0.67<br>to<br>0.07   | 0.47    |                    |                              |     | -<br>0.21 | -0.59<br>to<br>0.17   | 0.30    |                    |                          |     | -<br>0.30 | -0.80<br>to<br>0.20   | 0.44    |                    |
| MINO HCl      |             |     | -<br>0.20 | -0.82<br>to<br>0.42   | 0.30    |                    |                                                |     | -<br>0.20 | -0.66<br>to<br>0.26   | 0.36    |                    |                              |     |           |                       |         |                    |                          |     | -<br>0.20 | -0.77<br>to<br>0.37   | 0.37    |                    |
| AZ            |             |     | -<br>0.15 | -0.33<br>to<br>0.03   | 0.27    |                    |                                                |     | -<br>0.06 | -0.18<br>to<br>0.05   | 0.30    |                    |                              |     | -<br>0.11 | -0.34<br>to<br>0.11   | 0.22    |                    |                          |     | 0.15      | -0.20<br>to<br>0.50   | 0.07    |                    |
| CLM           |             |     | -<br>0.06 | -0.36<br>to<br>0.24   | 0.18    |                    |                                                |     | -<br>0.14 | -0.48<br>to<br>0.20   | 0.29    |                    |                              |     | -<br>0.06 | -0.37<br>to<br>0.25   | 0.17    |                    |                          |     | -<br>0.06 | -0.32<br>to<br>0.20   | 0.26    |                    |
| SD alone      |             |     | 0.00      |                       | 0.09    |                    |                                                |     | 0.00      |                       | 0.08    |                    |                              |     | 0.00      |                       | 0.08    |                    |                          |     | 0.00      |                       | 0.19    |                    |

**Table S20.** Sensitivity analyses for long-term PPD reduction following adjunctive use of systemic antibiotics

| Interventions | All studies |     |      |                |         |                    | Studies without outliers and influential cases |     |      |                |         |                    | Studies without imputed data |     |      |                |         |                    | Studies without high ROB |     |      |                |         |                    |
|---------------|-------------|-----|------|----------------|---------|--------------------|------------------------------------------------|-----|------|----------------|---------|--------------------|------------------------------|-----|------|----------------|---------|--------------------|--------------------------|-----|------|----------------|---------|--------------------|
|               | k           | o   | MD   | 95% CI         | p-score | I <sup>2</sup> (%) | k                                              | o   | MD   | 95% CI         | p-score | I <sup>2</sup> (%) | k                            | o   | MD   | 95% CI         | p-score | I <sup>2</sup> (%) | k                        | o   | MD   | 95% CI         | p-score | I <sup>2</sup> (%) |
| MET           | 10          | 866 | -    | -2.20 to -1.60 | 0.99    | 72.8               | 8                                              | 798 | -    | -2.16 to -1.64 | 1.00    | 43.6               | 8                            | 804 | -    | -2.19 to -1.61 | 0.99    | 74.8               | 7                        | 298 | -    | -2.14 to -1.66 | 1.00    | 0                  |
| Clindamycin   |             |     | -    | -1.96 to -1.24 | 0.81    |                    |                                                |     | -    | -1.93 to -1.27 | 0.80    |                    |                              |     | -    | -1.95 to -1.25 | 0.81    |                    |                          |     | -    | -1.91 to -1.29 | 0.80    |                    |
| DOX           |             |     | -    | -0.94 to -0.26 | 0.54    |                    |                                                |     | -    | -0.90 to -0.30 | 0.56    |                    |                              |     | -    | -0.93 to -0.27 | 0.55    |                    |                          |     | -    | -0.89 to -0.31 | 0.54    |                    |
| AMOX+MET      |             |     | -    | -0.58 to -0.40 | 0.45    |                    |                                                |     | -    | -0.52 to -0.39 | 0.44    |                    |                              |     | -    | -0.58 to -0.41 | 0.45    |                    |                          |     | -    | -0.58 to -0.47 | 0.46    |                    |
| AZ            |             |     | -    | -0.30 to 0.17  | 0.14    |                    |                                                |     | 0.02 | -0.20 to 0.24  | 0.09    |                    |                              |     | 0.06 | -0.27 to 0.39  | 0.07    |                    |                          |     | 0.07 | -0.23 to 0.36  | 0.07    |                    |
| SD alone      |             |     | 0.00 |                | 0.06    |                    |                                                |     | 0.00 |                | 0.11    |                    |                              |     | 0.00 |                | 0.13    |                    |                          |     | 0.00 |                | 0.13    |                    |

**Table S21.** Sensitivity analyses for short-term BOP reduction following adjunctive use of systemic antibiotics

| Interventions | All studies |     |       |                  |         |                    | Studies without outliers and influential cases |     |      |                  |         |                    | Studies without imputed data |     |       |                  |         |                    | Studies without high ROB |     |       |                  |         |                    |
|---------------|-------------|-----|-------|------------------|---------|--------------------|------------------------------------------------|-----|------|------------------|---------|--------------------|------------------------------|-----|-------|------------------|---------|--------------------|--------------------------|-----|-------|------------------|---------|--------------------|
|               | k           | o   | MD    | 95% CI           | p-score | I <sup>2</sup> (%) | k                                              | o   | MD   | 95% CI           | p-score | I <sup>2</sup> (%) | k                            | o   | MD    | 95% CI           | p-score | I <sup>2</sup> (%) | k                        | o   | MD    | 95% CI           | p-score | I <sup>2</sup> (%) |
| MET           | 17          | 644 | -     | -31.66 to -12.47 | 1.00    | 90.3               | 13                                             | 476 | -    | -26.29 to -15.98 | 1.00    | 24.4               | 14                           | 546 | -     | -32.92 to -11.91 | 1.00    | 92.5               | 10                       | 424 | -     | -33.03 to -11.65 | 0.99    | 95.4               |
| AMOX+MET      |             |     | -8.32 | -11.90 to -4.74  | 0.76    |                    |                                                |     | -    | -9.04 to -3.68   | 0.77    |                    |                              |     | -9.03 | -13.42 to -4.81  | 0.75    |                    |                          |     | -8.89 | -13.33 to -4.45  | 0.72    |                    |
| AZ            |             |     | -3.68 | -7.80 to 0.44    | 0.44    |                    |                                                |     | -    | -6.44 to -2.40   | 0.58    |                    |                              |     | -3.42 | -9.67 to 2.82    | 0.41    |                    |                          |     | -2.90 | -16.41 to 10.61  | 0.38    |                    |
| MOX           |             |     | -2.68 | -9.18 to 3.81    | 0.36    |                    |                                                |     | -    | -3.79 to 2.99    | 0.18    |                    |                              |     | -2.88 | -10.12 to 4.35   | 0.37    |                    |                          |     | -2.84 | -10.22 to 4.54   | 0.38    |                    |
| CLM           |             |     | -2.00 | -12.31 to 8.31   | 0.32    |                    |                                                |     | -    | -6.57 to 2.57    | 0.35    |                    |                              |     | -2.00 | -13.36 to 9.36   | 0.33    |                    |                          |     | -2.00 | -13.56 to 9.56   | 0.34    |                    |
| SD alone      |             |     | 0.00  |                  | 0.12    |                    |                                                |     | 0.00 |                  | 0.12    |                    |                              |     | 0.00  |                  | 0.14    |                    |                          |     | 0.00  |                  | 0.19    |                    |

**Table S22.** Sensitivity analyses for intermediate-term BOP reduction following adjunctive use of systemic antibiotics

| Interventions | All studies |     |           |                        |         |                    | Studies without outliers and influential cases |     |           |                        |         |                    | Studies without imputed data |     |           |                        |         |                    | Studies without high ROB |     |           |                        |         |                    |
|---------------|-------------|-----|-----------|------------------------|---------|--------------------|------------------------------------------------|-----|-----------|------------------------|---------|--------------------|------------------------------|-----|-----------|------------------------|---------|--------------------|--------------------------|-----|-----------|------------------------|---------|--------------------|
|               | k           | o   | MD        | 95% CI                 | p-score | I <sup>2</sup> (%) | k                                              | o   | MD        | 95% CI                 | p-score | I <sup>2</sup> (%) | k                            | o   | MD        | 95% CI                 | p-score | I <sup>2</sup> (%) | k                        | o   | MD        | 95% CI                 | p-score | I <sup>2</sup> (%) |
| AMOX+MET      | 14          | 525 | -<br>8.08 | -12.40<br>to -<br>3.77 | 0.96    | 92.1               | 11                                             | 405 | -<br>9.38 | -11.66<br>to -<br>7.10 | 1.00    | 30.1               | 12                           | 455 | -<br>8.10 | -12.61<br>to -<br>3.58 | 0.93    | 93.3               | 10                       | 393 | -<br>8.10 | -12.65<br>to -<br>3.54 | 0.95    | 94.7               |
| AZ            |             |     | -<br>3.16 | -7.97<br>to<br>1.65    | 0.56    |                    |                                                |     | -<br>4.05 | -6.37<br>to -<br>1.73  | 0.61    |                    |                              |     | -<br>3.88 | -10.53<br>to<br>2.77   | 0.59    |                    |                          |     | -<br>0.41 | -10.57<br>to<br>9.76   | 0.36    |                    |
| CLM           |             |     | -<br>1.89 | -9.11<br>to<br>5.32    | 0.42    |                    |                                                |     | -<br>2.05 | -5.35<br>to<br>1.25    | 0.35    |                    |                              |     | -<br>1.89 | -9.41<br>to<br>5.64    | 0.41    |                    |                          |     | -<br>1.89 | -9.47<br>to<br>5.14    | 0.44    |                    |
| MOX           |             |     | -<br>1.60 | -7.98<br>to<br>4.78    | 0.39    |                    |                                                |     |           |                        |         |                    |                              |     | -<br>1.60 | -8.29<br>to<br>5.09    | 0.38    |                    |                          |     | -<br>1.60 | -8.35<br>to<br>5.14    | 0.44    |                    |
| SD alone      |             |     | 0.00      |                        | 0.18    |                    |                                                |     | 0.00      |                        | 0.04    |                    |                              |     | 0.00      |                        | 0.19    |                    |                          |     | 0.00      |                        | 0.28    |                    |

**Table S23.** Sensitivity analyses for long-term BOP reduction following adjunctive use of systemic antibiotics

| Interventions | All studies |     |            |                         |         |                    | Studies without outliers and influential cases |     |            |                         |         |                    | Studies without imputed data |     |            |                         |         |                    | Studies without high ROB |     |            |                         |         |                    |
|---------------|-------------|-----|------------|-------------------------|---------|--------------------|------------------------------------------------|-----|------------|-------------------------|---------|--------------------|------------------------------|-----|------------|-------------------------|---------|--------------------|--------------------------|-----|------------|-------------------------|---------|--------------------|
|               | k           | o   | MD         | 95% CI                  | p-score | I <sup>2</sup> (%) | k                                              | o   | MD         | 95% CI                  | p-score | I <sup>2</sup> (%) | k                            | o   | MD         | 95% CI                  | p-score | I <sup>2</sup> (%) | k                        | o   | MD         | 95% CI                  | p-score | I <sup>2</sup> (%) |
| AMOX+MET      | 8           | 312 | -<br>14.27 | -16.99<br>to -<br>11.55 | 1.00    | 57.4               | 5                                              | 190 | -<br>14.52 | -17.31<br>to -<br>11.72 | 1.00    | 25.3               | 6                            | 250 | -<br>14.27 | -17.14<br>to -<br>11.40 | 1.00    | 68.7               | 6                        | 250 | -<br>14.27 | -17.14<br>to -<br>11.40 | 1.00    | 68.7               |
| SD alone      |             |     | 0.00       |                         | 0.48    |                    |                                                |     | 0.00       |                         | 0.50    |                    |                              |     | 0.00       |                         | 0.47    |                    |                          |     | 0.00       |                         | 0.47    |                    |
| AZ            |             |     | 3.51       | -0.56<br>to<br>7.58     | 0.02    |                    |                                                |     | 5.74       | 2.19<br>to<br>9.28      | 0.00    |                    |                              |     | 3.89       | -0.96<br>to<br>8.73     | 0.03    |                    |                          |     | 3.89       | -0.96<br>to<br>8.73     | 0.03    |                    |

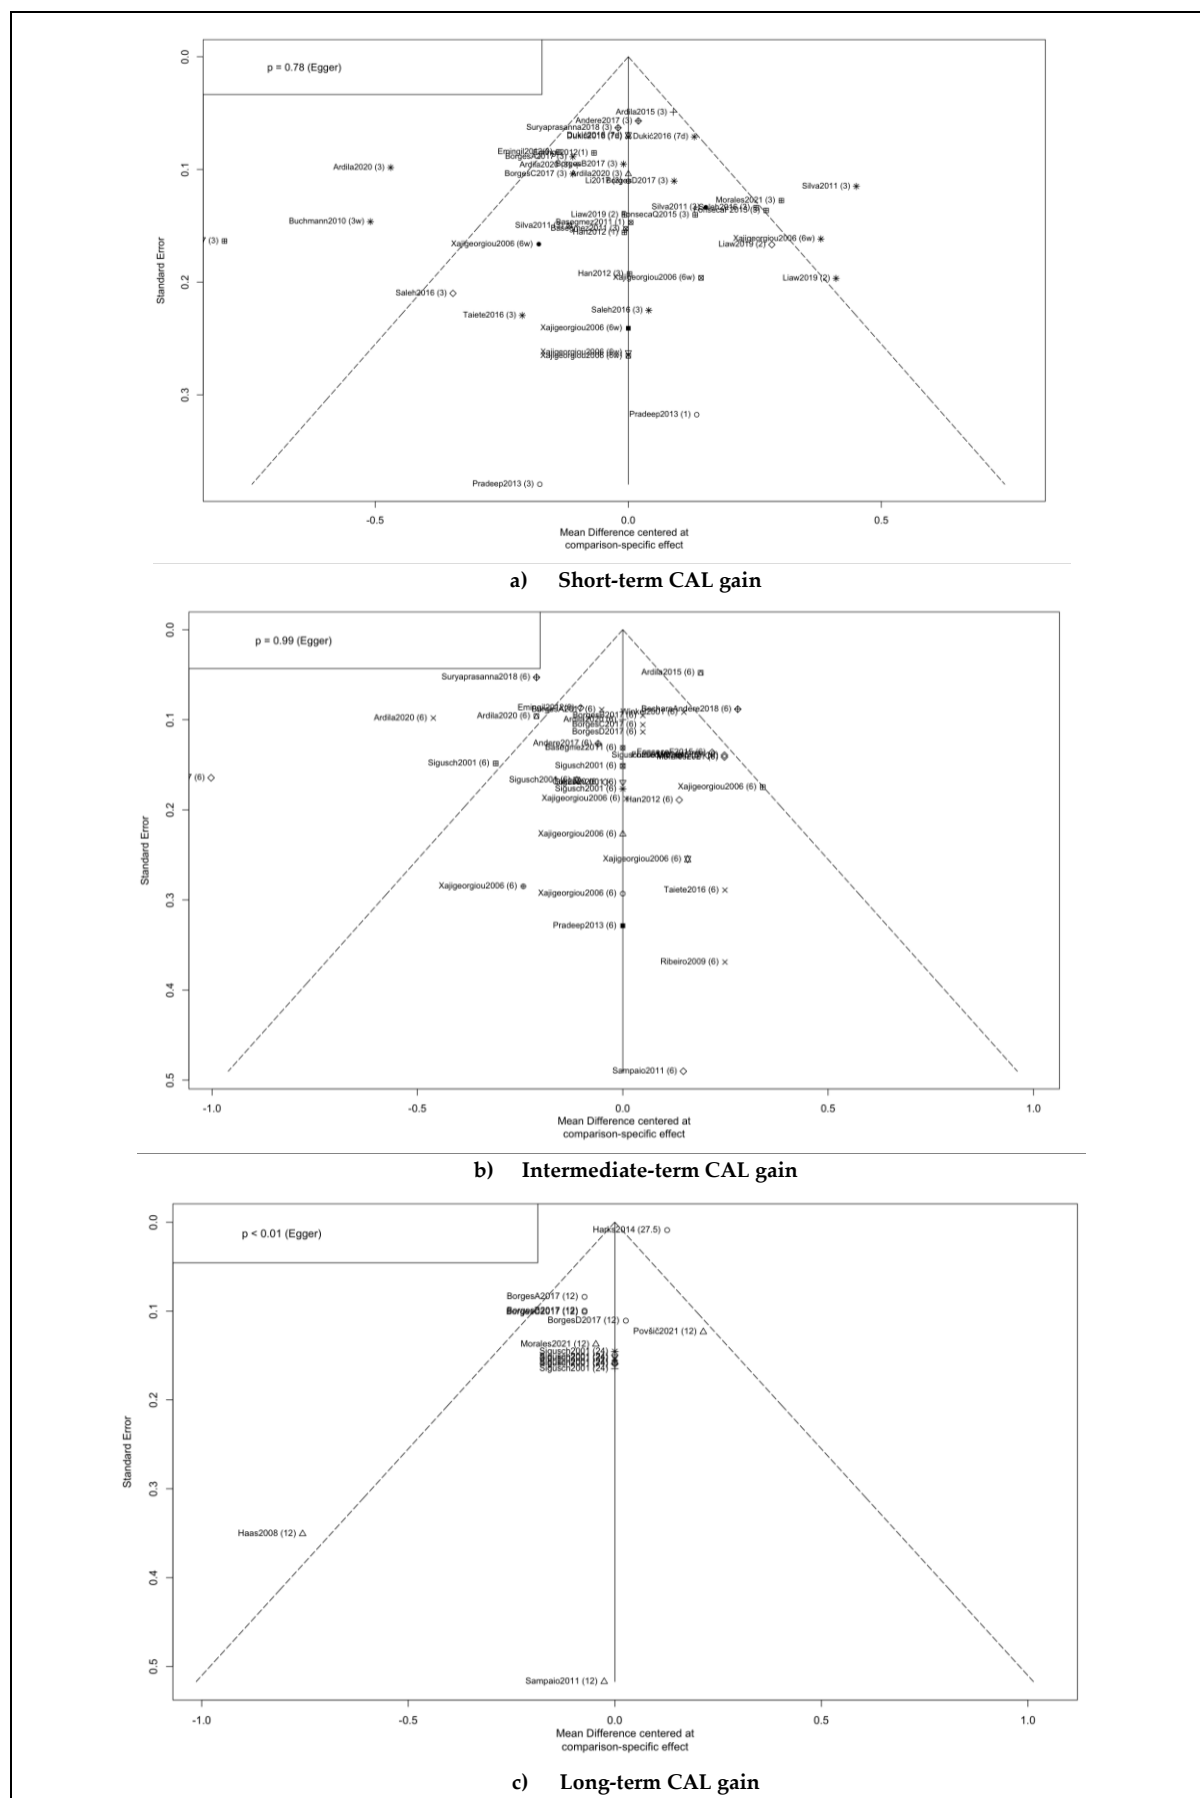

**Figure S7.** Funnel plots for NMA of CAL gain following adjunctive use of systemic antibiotics

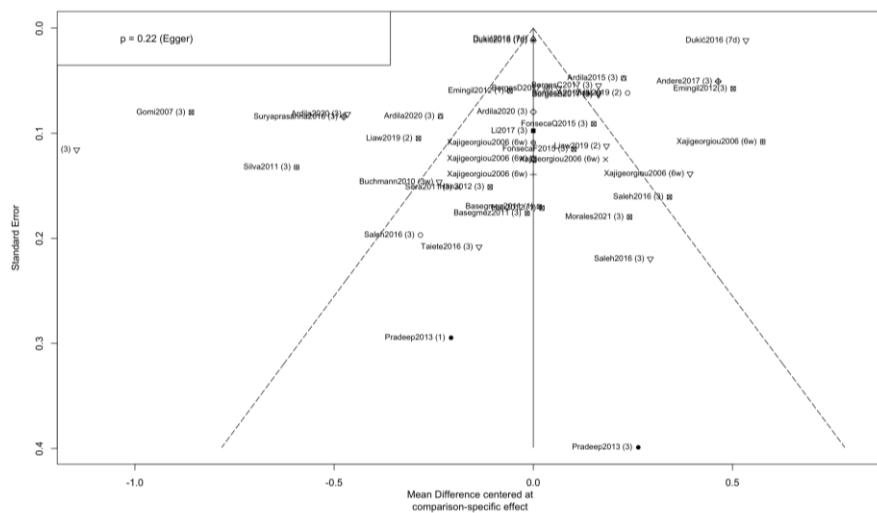

a) Short-term PPD reduction

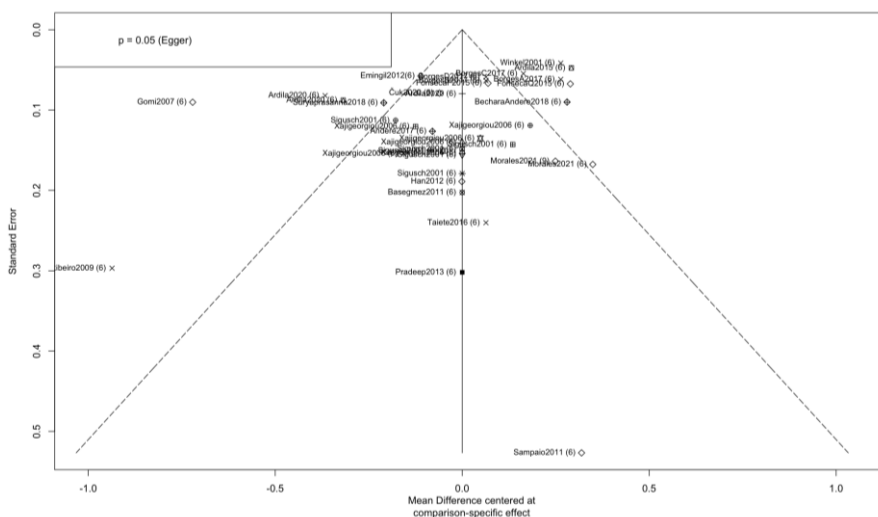

b) Intermediate-term PPD reduction

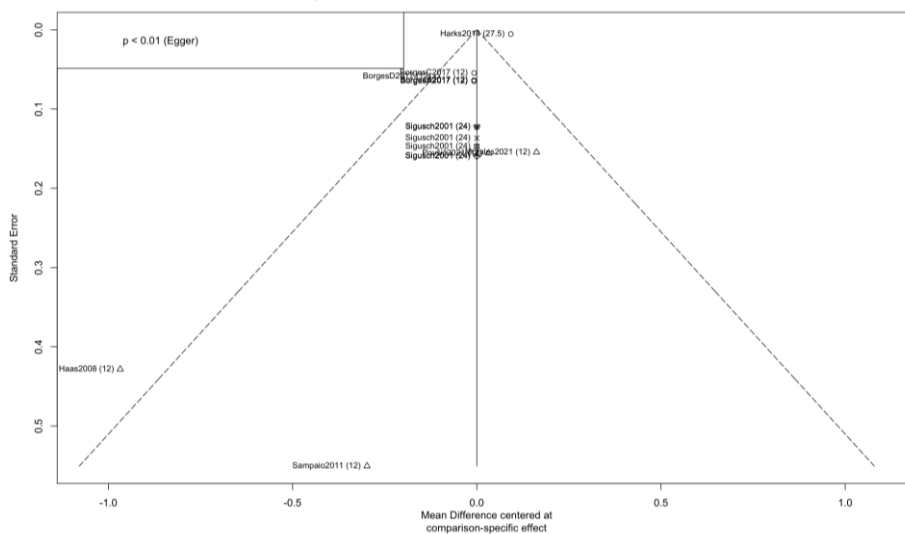

c) Long-term PPD reduction

Figure S8. Funnel plots for NMA of PPD reduction following adjunctive use of systemic antibiotics

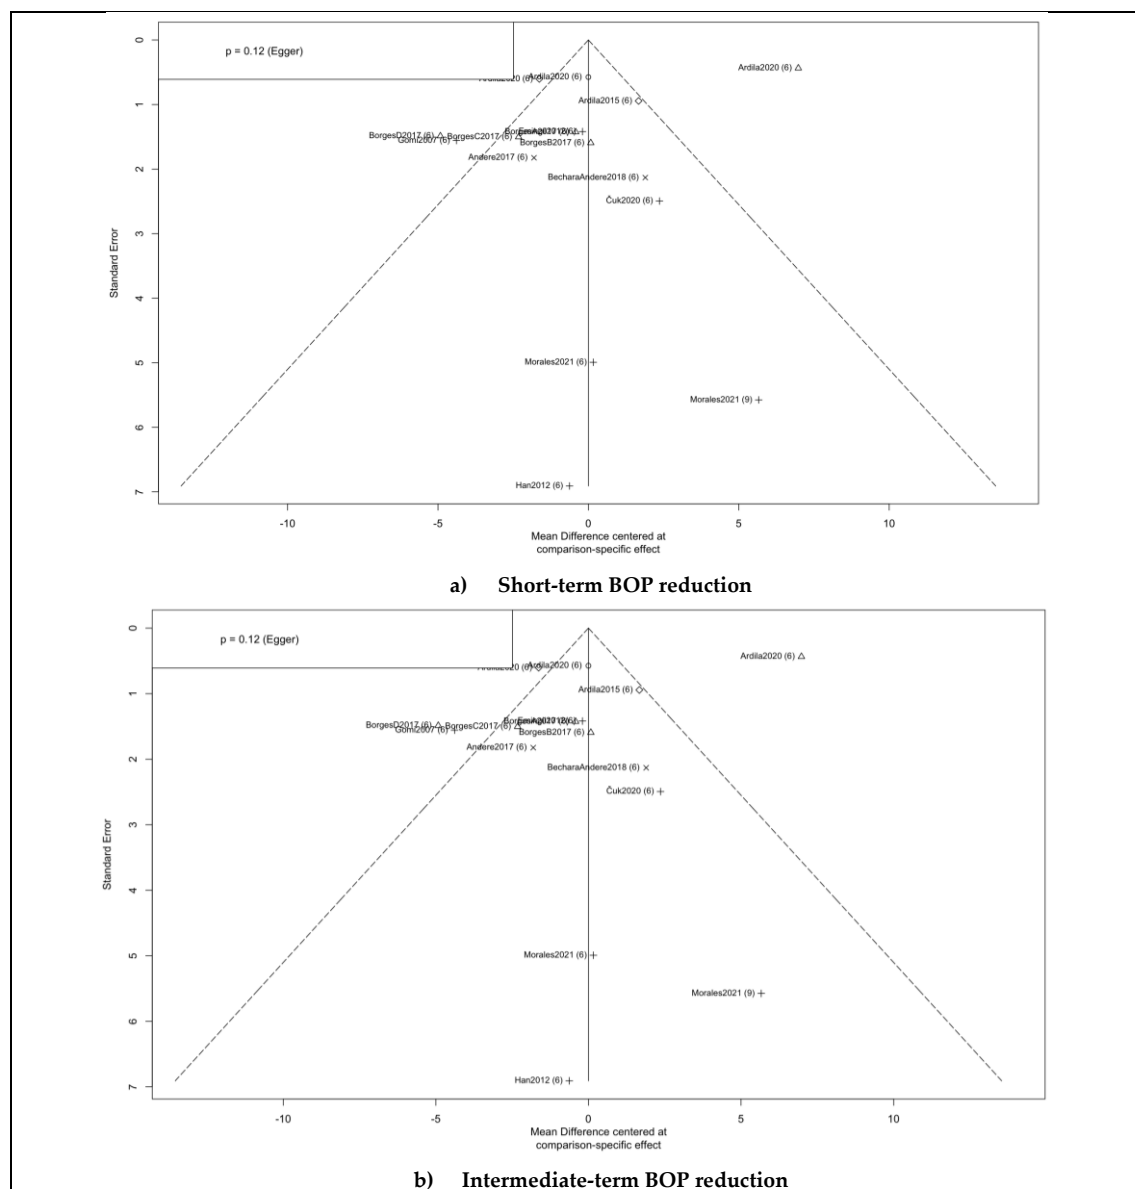

**Figure S9.** Funnel plots for NMA of BOP reduction following adjunctive use of systemic antibiotics



**Table S24.** Certainty of evidence for short-term CAL gain following the use of systemic antibiotics as adjunct to subgingival debridement

| Comparisons    | GRADE                  |                               |                        |                               |                        |                                  |
|----------------|------------------------|-------------------------------|------------------------|-------------------------------|------------------------|----------------------------------|
|                | Direct evidence        |                               | Indirect evidence      |                               | Network meta-analysis  |                                  |
|                | MD (95% CI)            | Certainty of evidence         | MD (95% CI)            | Certainty of evidence         | MD (95% CI)            | Certainty of evidence            |
| <b>SZ vs.</b>  |                        |                               |                        |                               |                        |                                  |
| MOX            | -                      | -                             | -1.22 (-1.86 to -0.59) | ⊕⊕○○ <sub>h</sub><br>Low      | -1.22 (-1.86 to -0.59) | ⊕⊕○○ <sub>h</sub><br>Low         |
| AMOX+MET       | -                      | -                             | -1.57 (-2.15 to -0.99) | ⊕○○○ <sub>i</sub><br>Very low | -1.57 (-2.15 to -0.99) | ⊕○○○ <sub>i</sub><br>Very low    |
| CLM            | -                      | -                             | -1.65 (-2.29 to -1.00) | ⊕⊕○○ <sub>h</sub><br>Low      | -1.65 (-2.29 to -1.00) | ⊕⊕○○ <sub>h</sub><br>Low         |
| SEC            | -                      | -                             | -1.67 (-2.40 to -0.93) | ⊕⊕○○ <sub>h</sub><br>Low      | -1.67 (-2.40 to -0.93) | ⊕⊕○○ <sub>h</sub><br>Low         |
| CEF            | -                      | -                             | -1.68 (-2.36 to -0.99) | ⊕⊕○○ <sub>h</sub><br>Low      | -1.68 (-2.36 to -0.99) | ⊕⊕○○ <sub>h</sub><br>Low         |
| AZ             | -                      | -                             | -1.74 (-2.33 to -1.16) | ⊕⊕○○ <sub>h</sub><br>Low      | -1.74 (-2.33 to -1.16) | ⊕⊕○○ <sub>h</sub><br>Low         |
| MINO HCl       | -                      | -                             | -1.77 (-2.44 to -1.10) | ⊕⊕○○ <sub>h</sub><br>Low      | -1.77 (-2.44 to -1.10) | ⊕⊕○○ <sub>h</sub><br>Low         |
| DOX            | -                      | -                             | -1.90 (-2.71 to -1.09) | ⊕⊕○○ <sub>h</sub><br>Low      | -1.90 (-2.71 to -1.09) | ⊕⊕○○ <sub>h</sub><br>Low         |
| MET            | -                      | -                             | -1.87 (-2.52 to -1.21) | ⊕○○○ <sub>i</sub><br>Very low | -1.87 (-2.52 to -1.21) | ⊕○○○ <sub>i</sub><br>Very low    |
| SD alone       | -1.87 (-2.43 to -1.30) | ⊕⊕○○ <sub>b</sub><br>Low      | -                      | -                             | -1.87 (-2.43 to -1.30) | ⊕⊕○○ <sub>h</sub><br>Low         |
| <b>MOX vs.</b> |                        |                               |                        |                               |                        |                                  |
| SZ             | -                      | -                             | 1.22 (0.59 to 1.86)    | ⊕⊕○○ <sub>h</sub><br>Low      | 1.22 (0.59 to 1.86)    | ⊕⊕○○ <sub>h</sub><br>Low         |
| AMOX+MET       | -0.09 (-0.56 to 0.38)  | ⊕⊕⊕○ <sub>e</sub><br>Moderate | -0.55 (-0.97 to -0.14) | ⊕○○○ <sub>i</sub><br>Very low | -0.35 (-0.66 to -0.04) | ⊕○○○ <sub>i</sub><br>Very low    |
| CLM            | -                      | -                             | -0.42 (-0.85 to 0.01)  | ⊕⊕⊕○ <sub>g</sub><br>Moderate | -0.42 (-0.85 to 0.01)  | ⊕⊕○○ <sub>e, g</sub><br>Low      |
| SEC            | -                      | -                             | -0.44 (-1.00 to 0.12)  | ⊕⊕○○ <sub>g</sub><br>Low      | -0.44 (-1.00 to 0.12)  | ⊕○○○ <sub>e, h</sub><br>Very low |

| Comparisons  | GRADE                  |                                        |                        |                                  |                        |                                     |
|--------------|------------------------|----------------------------------------|------------------------|----------------------------------|------------------------|-------------------------------------|
|              | Direct evidence        |                                        | Indirect evidence      |                                  | Network meta-analysis  |                                     |
|              | MD (95% CI)            | Certainty of evidence                  | MD (95% CI)            | Certainty of evidence            | MD (95% CI)            | Certainty of evidence               |
| CEF          | -                      | -                                      | -0.45 (-0.94 to 0.03)  | ⊕○○○ <sub>i</sub><br>Very low    | -0.45 (-0.94 to 0.03)  | ⊕○○○ <sub>e, i</sub><br>Very low    |
| AZ           | -                      | -                                      | -0.52 (-0.85 to -0.19) | ⊕○○○ <sub>i</sub><br>Very low    | -0.52 (-0.85 to -0.19) | ⊕○○○ <sub>i</sub><br>Very low       |
| MINO HCl     | -                      | -                                      | -0.55 (-1.01 to -0.08) | ⊕⊕⊕○ <sub>g</sub><br>Moderate    | -0.55 (-1.01 to -0.08) | ⊕⊕⊕○ <sub>g</sub><br>Moderate       |
| DOX          | -                      | -                                      | -0.67 (-1.32 to -0.02) | ⊕⊕○○ <sub>h</sub><br>Low         | -0.67 (-1.32 to -0.02) | ⊕⊕○○ <sub>h</sub><br>Low            |
| MET          | -                      | -                                      | -0.64 (-1.08 to -0.20) | ⊕○○○ <sub>i</sub><br>Very low    | -0.64 (-1.08 to -0.20) | ⊕○○○ <sub>i</sub><br>Very low       |
| SD alone     | -0.75 (-1.06 to -0.44) | ⊕⊕⊕⊕<br>High                           | 0.21 (-0.67 to 1.08)   | ⊕⊕⊕○ <sub>e, j</sub><br>Moderate | -0.64 (-0.94 to -0.35) | ⊕⊕○○ <sub>g, k</sub><br>Low         |
| AMOX+MET vs. |                        |                                        |                        |                                  |                        |                                     |
| SZ           | -                      | -                                      | 1.57 (0.99 to 2.15)    | ⊕○○○ <sub>i</sub><br>Very low    | 1.57 (0.99 to 2.15)    | ⊕○○○ <sub>i</sub><br>Very low       |
| MOX          | 0.09 (-0.38 to 0.56)   | ⊕⊕⊕○ <sub>e</sub><br>Moderate          | 0.55 (0.14 to 0.97)    | ⊕○○○ <sub>i</sub><br>Very low    | 0.35 (0.44 to 0.66)    | ⊕○○○ <sub>i</sub><br>Very low       |
| CLM          | -                      | -                                      | -0.07 (-0.41 to 0.26)  | ⊕○○○ <sub>i</sub><br>Very low    | -0.07 (-0.41 to 0.26)  | ⊕○○○ <sub>e, i</sub><br>Very low    |
| SEC          | -                      | -                                      | -0.09 (-0.58 to 0.40)  | ⊕○○○ <sub>i</sub><br>Very low    | -0.09 (-0.58 to 0.40)  | ⊕○○○ <sub>e, i</sub><br>Very low    |
| CEF          | -0.04 (-0.48 to 0.40)  | ⊕○○○ <sub>b, e</sub><br>Very low       | -0.33 (-1.15 to 0.48)  | ⊕⊕○○ <sub>h</sub><br>Low         | -0.11 (-0.49 to 0.28)  | ⊕○○○ <sub>e, h</sub><br>Very low    |
| AZ           | -0.05 (-0.45 to 0.34)  | ⊕○○○ <sub>a, c, e</sub><br>Very low    | -0.21 (-0.44 to 0.22)  | ⊕○○○ <sub>i</sub><br>Very low    | -0.17 (-0.37 to 0.03)  | ⊕○○○ <sub>e, i</sub><br>Very low    |
| MINO HCl     | -                      | -                                      | -0.20 (-0.59 to 0.19)  | ⊕○○○ <sub>i</sub><br>Very low    | -0.20 (-0.59 to 0.19)  | ⊕○○○ <sub>e, i</sub><br>Very low    |
| DOX          | -0.06 (-0.72 to 0.60)  | ⊕⊕○○ <sub>a, e</sub><br>Low            | -1.28 (-2.54 to -0.02) | ⊕○○○ <sub>i</sub><br>Very low    | -0.33 (-0.91 to 0.26)  | ⊕○○○ <sub>e, i</sub><br>Very low    |
| MET          | -0.06 (-0.44 to 0.32)  | ⊕○○○ <sub>a, c, d, e</sub><br>Very low | -1.09 (-1.80 to -0.39) | ⊕○○○ <sub>i</sub><br>Very low    | -0.29 (-0.63 to 0.04)  | ⊕○○○ <sub>e, i, k</sub><br>Very low |
| SD alone     | -0.29 (-0.43 to -0.15) | ⊕○○○ <sub>a, c, d, e</sub><br>Very low | -0.35 (-1.05 to 0.35)  | ⊕○○○ <sub>i</sub><br>Very low    | -0.29 (-0.43 to -0.15) | ⊕○○○ <sub>i</sub><br>Very low       |

| Comparisons    | GRADE                 |                             |                       |                               |                       |                                  |
|----------------|-----------------------|-----------------------------|-----------------------|-------------------------------|-----------------------|----------------------------------|
|                | Direct evidence       |                             | Indirect evidence     |                               | Network meta-analysis |                                  |
|                | MD (95% CI)           | Certainty of evidence       | MD (95% CI)           | Certainty of evidence         | MD (95% CI)           | Certainty of evidence            |
| <b>CLM vs.</b> |                       |                             |                       |                               |                       |                                  |
| SZ             | -                     | -                           | 1.65 (1.00 to 2.29)   | ⊕⊕○○ <sub>h</sub><br>Low      | 1.65 (1.00 to 2.29)   | ⊕⊕○○ <sub>h</sub><br>Low         |
| MOX            | -                     | -                           | 0.42 (0.01 to 0.85)   | ⊕⊕○○ <sub>h</sub><br>Low      | 0.42 (0.01 to 0.85)   | ⊕⊕○○ <sub>h</sub><br>Low         |
| AMOX+MET       | -                     | -                           | 0.07 (0.26 to 0.41)   | ⊕○○○ <sub>i</sub><br>Very low | 0.07 (0.26 to 0.41)   | ⊕○○○ <sub>i</sub><br>Very low    |
| SEC            | -                     | -                           | -0.02 (-0.58 to 0.54) | ⊕⊕○○ <sub>h</sub><br>Low      | -0.02 (-0.58 to 0.54) | ⊕○○○ <sub>e, i</sub><br>Very low |
| CEF            | -                     | -                           | -0.03 (-0.53 to 0.46) | ⊕⊕○○ <sub>h</sub><br>Low      | -0.03 (-0.53 to 0.46) | ⊕○○○ <sub>e, h</sub><br>Very low |
| AZ             | -                     | -                           | -0.10 (-0.44 to 0.25) | ⊕○○○ <sub>i</sub><br>Very low | -0.10 (-0.44 to 0.25) | ⊕○○○ <sub>e, i</sub><br>Very low |
| MINO HCl       | -                     | -                           | -0.12 (-0.60 to 0.35) | ⊕⊕○○ <sub>h</sub><br>Low      | -0.12 (-0.60 to 0.35) | ⊕○○○ <sub>e, i</sub><br>Very low |
| DOX            | -                     | -                           | -0.25 (-0.91 to 0.41) | ⊕⊕○○ <sub>h</sub><br>Low      | -0.25 (-0.91 to 0.41) | ⊕○○○ <sub>e, i</sub><br>Very low |
| MET            | -                     | -                           | -0.22 (-0.67 to 0.23) | ⊕○○○ <sub>i</sub><br>Very low | -0.22 (-0.67 to 0.23) | ⊕○○○ <sub>e, i</sub><br>Very low |
| SD alone       | -0.22 (-0.53 to 0.09) | ⊕⊕○○ <sub>d, e</sub><br>Low | -                     | -                             | -0.22 (-0.53 to 0.09) | ⊕○○○ <sub>e, i</sub><br>Very low |
| <b>SEC vs.</b> |                       |                             |                       |                               |                       |                                  |
| SZ             | -                     | -                           | 1.67 (0.93 to 2.40)   | ⊕⊕○○ <sub>h</sub><br>Low      | 1.67 (0.93 to 2.40)   | ⊕⊕○○ <sub>h</sub><br>Low         |
| MOX            | -                     | -                           | 0.44 (-0.12 to 1.00)  | ⊕⊕⊕○ <sub>g</sub><br>Moderate | 0.44 (-0.12 to 1.00)  | ⊕⊕○○ <sub>e, g</sub><br>Low      |
| AMOX+MET       | -                     | -                           | 0.09 (-0.40 to 0.58)  | ⊕○○○ <sub>i</sub><br>Very low | 0.09 (-0.40 to 0.58)  | ⊕○○○ <sub>e, i</sub><br>Very low |
| CLM            | -                     | -                           | 0.02 (-0.54 to 0.58)  | ⊕⊕○○ <sub>h</sub><br>Low      | 0.02 (-0.54 to 0.58)  | ⊕○○○ <sub>e, h</sub><br>Very low |
| CEF            | -                     | -                           | -0.01 (-0.62 to 0.60) | ⊕⊕○○ <sub>h</sub><br>Low      | -0.01 (-0.62 to 0.60) | ⊕○○○ <sub>e, h</sub><br>Very low |
| AZ             | -                     | -                           | -0.08 (-0.57 to 0.42) | ⊕○○○ <sub>i</sub><br>Very low | -0.08 (-0.57 to 0.42) | ⊕○○○ <sub>e, i</sub><br>Very low |

| Comparisons | GRADE                 |                                  |                       |                               |                       |                                  |
|-------------|-----------------------|----------------------------------|-----------------------|-------------------------------|-----------------------|----------------------------------|
|             | Direct evidence       |                                  | Indirect evidence     |                               | Network meta-analysis |                                  |
|             | MD (95% CI)           | Certainty of evidence            | MD (95% CI)           | Certainty of evidence         | MD (95% CI)           | Certainty of evidence            |
| MINO HCl    | -                     | -                                | -0.11 (-0.70 to 0.49) | ⊕⊕⊕○ <sub>g</sub><br>Moderate | -0.11 (-0.70 to 0.49) | ⊕⊕○○ <sub>e, g</sub><br>Low      |
| DOX         | -                     | -                                | -0.23 (-0.98 to 0.52) | ⊕⊕○○ <sub>h</sub><br>Low      | -0.23 (-0.98 to 0.52) | ⊕○○○ <sub>e, h</sub><br>Very low |
| MET         | -                     | -                                | -0.20 (-0.78 to 0.37) | ⊕○○○ <sub>i</sub><br>Very low | -0.20 (-0.78 to 0.37) | ⊕○○○ <sub>e, i</sub><br>Very low |
| SD alone    | -0.20 (-0.67 to 0.27) | ⊕⊕⊕○ <sub>e</sub><br>Moderate    | -                     | -                             | -0.20 (-0.67 to 0.27) | ⊕⊕○○ <sub>e, g</sub><br>Low      |
| CEF vs.     |                       |                                  |                       |                               |                       |                                  |
| SZ          | -                     | -                                | 1.68 (0.99 to 2.36)   | ⊕⊕○○ <sub>h</sub><br>Low      | 1.68 (0.99 to 2.36)   | ⊕⊕○○ <sub>h</sub><br>Low         |
| MOX         | -                     | -                                | 0.45 (-0.03 to 0.94)  | ⊕⊕○○ <sub>h</sub><br>Low      | 0.45 (-0.03 to 0.94)  | ⊕⊕○○ <sub>h</sub><br>Low         |
| AMOX+MET    | 0.04 (-0.40 to 0.48)  | ⊕○○○ <sub>b, e</sub><br>Very low | 0.33 (-0.48 to 1.15)  | ⊕○○○ <sub>i</sub><br>Very low | 0.11 (-0.28 to 0.49)  | ⊕○○○ <sub>e, i</sub><br>Very low |
| CLM         | -                     | -                                | 0.10 (-0.25 to 0.44)  | ⊕⊕○○ <sub>h</sub><br>Low      | 0.03 (-0.46 to 0.53)  | ⊕○○○ <sub>e, h</sub><br>Very low |
| SEC         | -                     | -                                | 0.08 (-0.42 to 0.57)  | ⊕⊕○○ <sub>h</sub><br>Low      | 0.01 (-0.60 to 0.62)  | ⊕○○○ <sub>e, h</sub><br>Very low |
| AZ          | -                     | -                                | -0.06 (-0.48 to 0.35) | ⊕○○○ <sub>i</sub><br>Very low | -0.06 (-0.48 to 0.35) | ⊕○○○ <sub>e, i</sub><br>Very low |
| MINO HCl    | -                     | -                                | -0.09 (-0.62 to 0.44) | ⊕⊕○○ <sub>h</sub><br>Low      | -0.09 (-0.62 to 0.44) | ⊕○○○ <sub>e, h</sub><br>Very low |
| DOX         | -                     | -                                | -0.22 (-0.91 to 0.48) | ⊕⊕○○ <sub>h</sub><br>Low      | -0.22 (-0.91 to 0.48) | ⊕○○○ <sub>e, h</sub><br>Very low |
| MET         | -                     | -                                | -0.19 (-0.69 to 0.31) | ⊕○○○ <sub>i</sub><br>Very low | -0.19 (-0.69 to 0.31) | ⊕○○○ <sub>e, i</sub><br>Very low |
| SD alone    | -0.12 (-0.56 to 0.32) | ⊕⊕○○ <sub>b, e</sub><br>Low      | -0.42 (-1.24 to 0.40) | ⊕⊕○○ <sub>h</sub><br>Low      | -0.19 (-0.57 to 0.20) | ⊕○○○ <sub>e, h</sub><br>Very low |
| AZ vs.      |                       |                                  |                       |                               |                       |                                  |
| SZ          | -                     | -                                | 1.74 (1.16 to 2.33)   | ⊕○○○ <sub>i</sub><br>Very low | 1.74 (1.16 to 2.33)   | ⊕○○○ <sub>i</sub><br>Very low    |

| Comparisons         | GRADE                 |                                        |                       |                               |                       |                                  |
|---------------------|-----------------------|----------------------------------------|-----------------------|-------------------------------|-----------------------|----------------------------------|
|                     | Direct evidence       |                                        | Indirect evidence     |                               | Network meta-analysis |                                  |
|                     | MD (95% CI)           | Certainty of evidence                  | MD (95% CI)           | Certainty of evidence         | MD (95% CI)           | Certainty of evidence            |
| MOX                 | -                     | -                                      | 0.52 (0.19 to 0.85)   | ⊕○○○ <sub>i</sub><br>Very low | 0.52 (0.19 to 0.85)   | ⊕○○○ <sub>i</sub><br>Very low    |
| AMOX+MET            | 0.05 (-0.34 to 0.45)  | ⊕○○○ <sub>a, c, e</sub><br>Very low    | 0.21 (-0.22 to 0.44)  | ⊕○○○ <sub>i</sub><br>Very low | 0.17 (-0.03 to 0.37)  | ⊕○○○ <sub>e, i</sub><br>Very low |
| CLM                 |                       | -                                      | 0.10 (-0.25 to 0.44)  | ⊕○○○ <sub>i</sub><br>Very low | 0.10 (-0.25 to 0.44)  | ⊕○○○ <sub>e, i</sub><br>Very low |
| SEC                 | -                     | -                                      | 0.08 (-0.42 to 0.57)  | ⊕○○○ <sub>i</sub><br>Very low | 0.08 (-0.42 to 0.57)  | ⊕○○○ <sub>e, i</sub><br>Very low |
| CEF                 | -                     | -                                      | 0.06 (-0.35 to 0.48)  | ⊕○○○ <sub>i</sub><br>Very low | 0.06 (-0.35 to 0.48)  | ⊕○○○ <sub>e, i</sub><br>Very low |
| MINO HCl            | -                     | -                                      | -0.03 (-0.42 to 0.37) | ⊕○○○ <sub>i</sub><br>Very low | -0.03 (-0.42 to 0.37) | ⊕○○○ <sub>e, i</sub><br>Very low |
| DOX                 | -                     | -                                      | -0.15 (-0.76 to 0.45) | ⊕○○○ <sub>i</sub><br>Very low | -0.15 (-0.76 to 0.45) | ⊕○○○ <sub>e, i</sub><br>Very low |
| MET                 | -                     | -                                      | -0.12 (-0.49 to 0.24) | ⊕○○○ <sub>i</sub><br>Very low | -0.12 (-0.49 to 0.24) | ⊕○○○ <sub>e, i</sub><br>Very low |
| SD alone            | -0.10 (-0.26 to 0.05) | ⊕○○○ <sub>a, c, d, e</sub><br>Very low | -0.50 (-1.19 to 0.19) | ⊕○○○ <sub>i</sub><br>Very low | -0.12 (-0.27 to 0.03) | ⊕○○○ <sub>e, i</sub><br>Very low |
| <b>MINO HCl vs.</b> |                       |                                        |                       |                               |                       |                                  |
| SZ                  | -                     | -                                      | 1.77 (1.10 to 2.44)   | ⊕⊕○○ <sub>h</sub><br>Low      | 1.77 (1.10 to 2.44)   | ⊕⊕○○ <sub>h</sub><br>Low         |
| MOX                 | -                     | -                                      | 0.55 (0.08 to 1.01)   | ⊕⊕⊕○ <sub>g</sub><br>Moderate | 0.55 (0.08 to 1.01)   | ⊕⊕⊕○ <sub>g</sub><br>Moderate    |
| AMOX+MET            | -                     | -                                      | 0.20 (-0.03 to 0.37)  | ⊕○○○ <sub>i</sub><br>Very low | 0.20 (-0.03 to 0.37)  | ⊕○○○ <sub>e, i</sub><br>Very low |
| CLM                 | -                     | -                                      | 0.12 (-0.35 to 0.60)  | ⊕⊕○○ <sub>h</sub><br>Low      | 0.12 (-0.35 to 0.60)  | ⊕○○○ <sub>e, h</sub><br>Very low |
| SEC                 | -                     | -                                      | 0.11 (-0.49 to 0.70)  | ⊕⊕⊕○ <sub>g</sub><br>Moderate | 0.11 (-0.49 to 0.70)  | ⊕⊕○○ <sub>e, h</sub><br>Low      |
| CEF                 | -                     | -                                      | 0.09 (-0.44 to 0.62)  | ⊕⊕○○ <sub>h</sub><br>Low      | 0.09 (-0.44 to 0.62)  | ⊕○○○ <sub>e, h</sub><br>Very low |
| AZ                  | -                     | -                                      | 0.03 (-0.37 to 0.42)  | ⊕○○○ <sub>i</sub><br>Very low | 0.03 (-0.37 to 0.42)  | ⊕○○○ <sub>e, i</sub><br>Very low |

| Comparisons    | GRADE                 |                                        |                       |                               |                       |                                     |
|----------------|-----------------------|----------------------------------------|-----------------------|-------------------------------|-----------------------|-------------------------------------|
|                | Direct evidence       |                                        | Indirect evidence     |                               | Network meta-analysis |                                     |
|                | MD (95% CI)           | Certainty of evidence                  | MD (95% CI)           | Certainty of evidence         | MD (95% CI)           | Certainty of evidence               |
| DOX            | -                     | -                                      | -0.13 (-0.81 to 0.56) | ⊕○○○ <sub>i</sub><br>Very low | -0.13 (-0.81 to 0.56) | ⊕○○○ <sub>e, i</sub><br>Very low    |
| MET            | -                     | -                                      | -0.10 (-0.59 to 0.39) | ⊕○○○ <sub>i</sub><br>Very low | -0.10 (-0.59 to 0.39) | ⊕○○○ <sub>e, i</sub><br>Very low    |
| SD alone       | -0.09 (-0.46 to 0.27) | ⊕⊕⊕○ <sub>e</sub><br>Moderate          | -                     | -                             | -0.09 (-0.46 to 0.27) | ⊕⊕○○ <sub>e, g</sub><br>Low         |
| <b>DOX vs.</b> |                       |                                        |                       |                               |                       |                                     |
| SZ             | -                     | -                                      | 1.90 (1.09 to 2.71)   | ⊕⊕○○ <sub>h</sub><br>Low      | 1.90 (1.09 to 2.71)   | ⊕⊕○○ <sub>h</sub><br>Low            |
| MOX            | -                     | -                                      | 0.67 (0.02 to 1.32)   | ⊕⊕○○ <sub>h</sub><br>Low      | 0.67 (0.02 to 1.32)   | ⊕⊕○○ <sub>h</sub><br>Low            |
| AMOX+MET       | 0.06 (-0.60 to 0.72)  | ⊕⊕○○ <sub>a, e</sub><br>Low            | 1.28 (-0.02 to 2.53)  | ⊕○○○ <sub>i</sub><br>Very low | 0.33 (-0.26 to 0.91)  | ⊕○○○ <sub>e, i</sub><br>Very low    |
| CLM            | -                     | -                                      | 0.25 (-0.41 to 0.91)  | ⊕⊕○○ <sub>h</sub><br>Low      | 0.25 (-0.41 to 0.91)  | ⊕○○○ <sub>e, i</sub><br>Very low    |
| SEC            | -                     | -                                      | 0.23 (-0.52 to 0.98)  | ⊕⊕○○ <sub>h</sub><br>Low      | 0.23 (-0.52 to 0.98)  | ⊕○○○ <sub>e, i</sub><br>Very low    |
| CEF            | -                     | -                                      | 0.22 (-0.48 to 0.91)  | ⊕⊕○○ <sub>h</sub><br>Low      | 0.22 (-0.48 to 0.91)  | ⊕○○○ <sub>e, l</sub><br>Very low    |
| AZ             | -                     | -                                      | 0.15 (-0.45 to 0.76)  | ⊕○○○ <sub>i</sub><br>Very low | 0.15 (-0.45 to 0.76)  | ⊕○○○ <sub>e, i</sub><br>Very low    |
| MINO HCl       | -                     | -                                      | 0.13 (-0.56 to 0.81)  | ⊕⊕○○ <sub>h</sub><br>Low      | 0.13 (-0.56 to 0.81)  | ⊕○○○ <sub>e, i</sub><br>Very low    |
| MET            | 0.14 (-0.53 to 0.81)  | ⊕⊕○○ <sub>a, e</sub><br>Low            | -0.63 (-2.27 to 1.01) | ⊕○○○ <sub>i</sub><br>Very low | 0.03 (-0.59 to 0.65)  | ⊕○○○ <sub>e, i</sub><br>Very low    |
| SD alone       | 0.15 (-0.48 to 0.78)  | ⊕⊕○○ <sub>a, e</sub><br>Low            | -0.68 (-2.23 to 0.87) | ⊕⊕○○ <sub>h</sub><br>Low      | 0.03 (-0.55 to 0.62)  | ⊕○○○ <sub>e, h</sub><br>Very low    |
| <b>MET vs.</b> |                       |                                        |                       |                               |                       |                                     |
| SZ             | -                     | -                                      | 1.87 (1.21 to 2.52)   | ⊕○○○ <sub>i</sub><br>Very low | 1.87 (1.21 to 2.52)   | ⊕○○○ <sub>i</sub><br>Very low       |
| MOX            | -                     | -                                      | 0.64 (0.20 to 1.08)   | ⊕○○○ <sub>i</sub><br>Very low | 0.64 (0.20 to 1.08)   | ⊕○○○ <sub>i</sub><br>Very low       |
| AMOX+MET       | 0.06 (-0.32 to 0.44)  | ⊕○○○ <sub>a, c, d, e</sub><br>Very low | 1.09 (0.39 to 1.80)   | ⊕○○○ <sub>i</sub><br>Very low | 0.29 (0.04 to 0.63)   | ⊕○○○ <sub>e, i, k</sub><br>Very low |

| Comparisons  | GRADE                 |                                        |                        |                               |                       |                                     |
|--------------|-----------------------|----------------------------------------|------------------------|-------------------------------|-----------------------|-------------------------------------|
|              | Direct evidence       |                                        | Indirect evidence      |                               | Network meta-analysis |                                     |
|              | MD (95% CI)           | Certainty of evidence                  | MD (95% CI)            | Certainty of evidence         | MD (95% CI)           | Certainty of evidence               |
| CLM          | -                     | -                                      | 0.22 (-0.23 to 0.67)   | ⊕○○○ <sub>i</sub><br>Very low | 0.22 (-0.23 to 0.67)  | ⊕○○○ <sub>e, i</sub><br>Very low    |
| SEC          | -                     | -                                      | 0.20 (-0.37 to 0.78)   | ⊕○○○ <sub>i</sub><br>Very low | 0.20 (-0.37 to 0.78)  | ⊕○○○ <sub>e, i</sub><br>Very low    |
| CEF          | -                     | -                                      | 0.19 (-0.31 to 0.69)   | ⊕○○○ <sub>i</sub><br>Very low | 0.19 (-0.31 to 0.69)  | ⊕○○○ <sub>e, i</sub><br>Very low    |
| AZ           | -                     | -                                      | 0.12 (-0.24 to 0.49)   | ⊕○○○ <sub>i</sub><br>Very low | 0.12 (-0.24 to 0.49)  | ⊕○○○ <sub>e, i</sub><br>Very low    |
| MINO HCl     | -                     | -                                      | 0.10 (-0.39 to 0.59)   | ⊕○○○ <sub>i</sub><br>Very low | 0.10 (-0.39 to 0.59)  | ⊕○○○ <sub>e, i</sub><br>Very low    |
| DOX          | -0.14 (-0.81 to 0.53) | ⊕⊕○○ <sub>a, e</sub><br>Low            | 0.63 (-1.01 to 2.27)   | ⊕○○○ <sub>i</sub><br>Very low | -0.03 (-0.65 to 0.59) | ⊕○○○ <sub>e, i</sub><br>Very low    |
| SD alone     | 0.19 (-0.17 to 0.55)  | ⊕○○○ <sub>a, d, e</sub><br>Very low    | -0.99 (-1.82 to -0.15) | ⊕○○○ <sub>i</sub><br>Very low | 0.00 (-0.33 to 0.33)  | ⊕○○○ <sub>e, i, k</sub><br>Very low |
| SD alone vs. |                       |                                        |                        |                               |                       |                                     |
| SZ           | 1.87 (1.30 to 2.43)   | ⊕⊕○○ <sub>b</sub><br>Low               | -                      | -                             | 1.87 (1.30 to 2.43)   | ⊕⊕○○ <sub>g</sub><br>Low            |
| MOX          | 0.75 (0.44 to 1.06)   | ⊕⊕⊕⊕<br>High                           | -0.21 (-1.08 to 0.67)  | ⊕⊕⊕⊕ <sub>i</sub><br>High     | 0.64 (0.35 to 0.94)   | ⊕⊕⊕⊕ <sub>j</sub><br>High           |
| AMOX+MET     | 0.29 (0.15 to 0.43)   | ⊕○○○ <sub>a, c, d, e</sub><br>Very low | 0.35 (-0.35 to 1.05)   | ⊕○○○ <sub>i</sub><br>Very low | 0.29 (0.15 to 0.43)   | ⊕○○○ <sub>i</sub><br>Very low       |
| CLM          | 0.22 (0.09 to 0.53)   | ⊕⊕○○ <sub>d, e</sub><br>Low            | -                      | -                             | 0.22 (-0.09 to 0.53)  | ⊕○○○ <sub>e, h</sub><br>Very low    |
| SEC          | 0.20 (-0.27 to 0.67)  | ⊕⊕⊕○ <sub>e</sub><br>Moderate          | -                      | -                             | 0.20 (-0.27 to 0.67)  | ⊕⊕○○ <sub>e, g</sub><br>Low         |
| CEF          | 0.12 (-0.32 to 0.56)  | ⊕○○○ <sub>b, e</sub><br>Very low       | 0.42 (-0.40 to 1.24)   | ⊕○○○ <sub>i</sub><br>Very low | 0.19 (-0.20 to 0.57)  | ⊕○○○ <sub>e, i</sub><br>Very low    |
| AZ           | 0.10 (-0.05 to 0.26)  | ⊕○○○ <sub>a, c, d, e</sub><br>Very low | 0.50 (-0.19 to 1.19)   | ⊕○○○ <sub>i</sub><br>Very low | 0.12 (-0.03 to 0.27)  | ⊕○○○ <sub>e, i</sub><br>Very low    |
| MINO HCl     | 0.09 (-0.27 to 0.46)  | ⊕⊕⊕○ <sub>e</sub><br>Moderate          | -                      | -                             | 0.09 (-0.27 to 0.46)  | ⊕⊕○○ <sub>e, g</sub><br>Low         |
| DOX          | -0.15 (-0.78 to 0.48) | ⊕⊕○○ <sub>a, e</sub><br>Low            | 0.68 (-0.87 to 2.23)   | ⊕⊕○○ <sub>h</sub><br>Low      | -0.03 (-0.62 to 0.55) | ⊕○○○ <sub>e, i</sub><br>Very low    |

| Comparisons | GRADE                 |                                     |                     |                               |                       |                                     |
|-------------|-----------------------|-------------------------------------|---------------------|-------------------------------|-----------------------|-------------------------------------|
|             | Direct evidence       |                                     | Indirect evidence   |                               | Network meta-analysis |                                     |
|             | MD (95% CI)           | Certainty of evidence               | MD (95% CI)         | Certainty of evidence         | MD (95% CI)           | Certainty of evidence               |
| MET         | -0.19 (-0.55 to 0.17) | ⊕○○○ <sup>a, d, e</sup><br>Very low | 0.99 (0.15 to 1.82) | ⊕○○○ <sup>i</sup><br>Very low | 0.00 (-0.33 to 0.33)  | ⊕○○○ <sup>e, i, k</sup><br>Very low |

<sup>a</sup> serious risk of bias; <sup>b</sup> very serious risk of bias; <sup>c</sup> serious inconsistency; <sup>d</sup> serious indirectness <sup>e</sup> serious imprecision; <sup>f</sup> publication bias; <sup>g</sup> contributing evidence of moderate quality; <sup>h</sup> contributing evidence of low quality; <sup>i</sup> contributing evidence of very low quality; <sup>j</sup> contributing evidence of high quality; <sup>k</sup> incoherence

**Table S25.** Certainty of evidence for intermediate-term CAL gain following the use of systemic antibiotics as adjunct to subgingival debridement

| Comparisons    | GRADE                  |                               |                        |                               |                        |                                  |
|----------------|------------------------|-------------------------------|------------------------|-------------------------------|------------------------|----------------------------------|
|                | Direct evidence        |                               | Indirect evidence      |                               | Network meta-analysis  |                                  |
|                | MD (95% CI)            | Certainty of evidence         | MD (95% CI)            | Certainty of evidence         | MD (95% CI)            | Certainty of evidence            |
| <b>SZ vs.</b>  |                        |                               |                        |                               |                        |                                  |
| MET            | -                      | -                             | -1.10 (-2.00 to -0.20) | ⊕⊕○○ <sup>h</sup><br>Low      | -1.10 (-2.00 to -0.20) | ⊕⊕○○ <sup>h</sup><br>Low         |
| Clindamycin    | -                      | -                             | -1.15 (-2.13 to -0.18) | ⊕⊕○○ <sup>h</sup><br>Low      | -1.15 (-2.13 to -0.18) | ⊕⊕○○ <sup>h</sup><br>Low         |
| MOX            | -                      | -                             | -1.35 (-2.23 to -0.48) | ⊕⊕○○ <sup>h</sup><br>Low      | -1.35 (-2.23 to -0.48) | ⊕⊕○○ <sup>h</sup><br>Low         |
| AMOX+MET       | -                      | -                             | -1.61 (-2.44 to -0.78) | ⊕○○○ <sup>i</sup><br>Very low | -1.61 (-2.44 to -0.78) | ⊕○○○ <sup>i</sup><br>Very low    |
| DOX            | -                      | -                             | -1.65 (-2.57 to -0.73) | ⊕○○○ <sup>i</sup><br>Very low | -1.65 (-2.57 to -0.73) | ⊕○○○ <sup>i</sup><br>Very low    |
| AZ             | -                      | -                             | -1.89 (-2.72 to -1.05) | ⊕○○○ <sup>i</sup><br>Very low | -1.89 (-2.72 to -1.05) | ⊕○○○ <sup>i</sup><br>Very low    |
| CLM            | -                      | -                             | -1.96 (-2.82 to -1.10) | ⊕○○○ <sup>i</sup><br>Very low | -1.96 (-2.82 to -1.10) | ⊕○○○ <sup>i</sup><br>Very low    |
| MINO HCl       | -                      | -                             | -2.00 (-2.98 to -1.02) | ⊕⊕○○ <sup>h</sup><br>Low      | -2.00 (-2.98 to -1.02) | ⊕⊕○○ <sup>h</sup><br>Low         |
| SD alone       | -2.07 (-2.88 to -1.26) | ⊕⊕○○ <sup>b</sup><br>Low      | -                      | -                             | -2.07 (-2.88 to -1.26) | ⊕⊕○○ <sup>h</sup><br>Low         |
| <b>MET vs.</b> |                        |                               |                        |                               |                        |                                  |
| SZ             | -                      | -                             | 1.10 (0.20 to 2.00)    | ⊕⊕○○ <sup>h</sup><br>Low      | 1.10 (0.20 to 2.00)    | ⊕⊕○○ <sup>h</sup><br>Low         |
| Clindamycin    | -0.20 (-0.77 to 0.37)  | ⊕⊕⊕○ <sup>e</sup><br>Moderate | 1.04 (-0.49 to 2.58)   | ⊕⊕○○ <sup>h</sup><br>Low      | -0.05 (-0.58 to 0.49)  | ⊕○○○ <sup>e, h</sup><br>Very low |
| MOX            | -                      | -                             | -0.25 (-0.77 to 0.27)  | ⊕⊕○○ <sup>h</sup><br>Low      | -0.25 (-0.77 to 0.27)  | ⊕○○○ <sup>e, h</sup><br>Very low |



| Comparisons     | GRADE                  |                                     |                        |                               |                        |                                 |
|-----------------|------------------------|-------------------------------------|------------------------|-------------------------------|------------------------|---------------------------------|
|                 | Direct evidence        |                                     | Indirect evidence      |                               | Network meta-analysis  |                                 |
|                 | MD (95% CI)            | Certainty of evidence               | MD (95% CI)            | Certainty of evidence         | MD (95% CI)            | Certainty of evidence           |
| AMOX+MET        | -0.21 (-0.87 to 0.45)  | ⊕⊕○○ <sub>a,e</sub><br>Low          | -0.71 (-1.25 to -0.17) | ⊕○○○ <sub>i</sub><br>Very low | -0.51 (-0.93 to -0.09) | ⊕○○○ <sub>i</sub><br>Very low   |
| DOX             | -0.56 (-1.01 to -0.11) | ⊕○○○ <sub>a,c,d,e</sub><br>Very low | -0.54 (-0.99 to -0.10) | ⊕○○○ <sub>i</sub><br>Very low | -0.54 (-0.99 to -0.10) | ⊕○○○ <sub>i</sub><br>Very low   |
| AZ              | -                      | -                                   | -0.78 (-1.23 to -0.34) | ⊕○○○ <sub>i</sub><br>Very low | -0.78 (-1.23 to -0.34) | ⊕○○○ <sub>i</sub><br>Very low   |
| CLM             | -                      | -                                   | -0.86 (-1.35 to -0.36) | ⊕○○○ <sub>i</sub><br>Very low | -0.86 (-1.35 to -0.36) | ⊕○○○ <sub>i</sub><br>Very low   |
| MINO HCl        | -                      | -                                   | -0.90 (-1.58 to -0.22) | ⊕⊕○○ <sub>h</sub><br>Low      | -0.90 (-1.58 to -0.22) | ⊕⊕○○ <sub>h</sub><br>Low        |
| SD alone        | -0.99 (-1.40 to -0.58) | ⊕⊕○○ <sub>a,c</sub><br>Low          | -0.71 (-2.04 to 0.62)  | ⊕⊕○○ <sub>h</sub><br>Low      | -0.97 (-1.36 to -0.57) | ⊕⊕○○ <sub>h</sub><br>Low        |
| Clindamycin vs. |                        |                                     |                        |                               |                        |                                 |
| SZ              | -                      | -                                   | 1.15 (0.18 to 2.13)    | ⊕⊕○○ <sub>h</sub><br>Low      | 1.15 (0.18 to 2.13)    | ⊕⊕○○ <sub>h</sub><br>Low        |
| MET             | 0.20 (-0.37 to 0.77)   | ⊕⊕⊕○ <sub>e</sub><br>Moderate       | 1.04 (-0.49 to 2.58)   | ⊕⊕○○ <sub>h</sub><br>Low      | 0.05 (-0.49 to 0.58)   | ⊕○○○ <sub>e,i</sub><br>Very low |
| MOX             | -                      | -                                   | -0.20 (-0.84 to 0.44)  | ⊕⊕⊕○ <sub>g</sub><br>Moderate | -0.20 (-0.84 to 0.44)  | ⊕⊕○○ <sub>e,g</sub><br>Low      |
| AMOX+MET        | -                      | -                                   | -0.46 (-1.03 to 0.10)  | ⊕○○○ <sub>i</sub><br>Very low | -0.46 (-1.03 to 0.10)  | ⊕○○○ <sub>e,i</sub><br>Very low |
| DOX             | -0.50 (-1.09 to 0.09)  | ⊕⊕⊕○ <sub>e</sub><br>Moderate       | -0.47 (-2.06 to 1.11)  | ⊕○○○ <sub>i</sub><br>Very low | -0.50 (-1.05 to 0.06)  | ⊕○○○ <sub>e,i</sub><br>Very low |
| AZ              | -                      | -                                   | -0.74 (-1.32 to -0.15) | ⊕○○○ <sub>i</sub><br>Very low | -0.74 (-1.32 to -0.15) | ⊕○○○ <sub>i</sub><br>Very low   |
| CLM             | -                      | -                                   | -0.81 (-1.43 to -0.19) | ⊕○○○ <sub>i</sub><br>Very low | -0.81 (-1.43 to -0.19) | ⊕○○○ <sub>e,i</sub><br>Very low |
| MINO HCl        | -                      | -                                   | -0.85 (-1.62 to -0.07) | ⊕⊕⊕○ <sub>g</sub><br>Moderate | -0.85 (-1.62 to -0.07) | ⊕⊕⊕○ <sub>g</sub><br>Moderate   |
| SD alone        | -1.10 (-1.70 to -0.50) | ⊕⊕⊕○ <sub>a</sub><br>Moderate       | -0.11 (-1.37 to 1.16)  | ⊕⊕⊕○ <sub>g</sub><br>Moderate | -0.92 (-1.46 to -0.38) | ⊕⊕⊕○ <sub>g</sub><br>Moderate   |
| MOX vs.         |                        |                                     |                        |                               |                        |                                 |
| SZ              | -                      | -                                   | 1.35 (0.48 to 2.23)    | ⊕⊕○○ <sub>h</sub><br>Low      | 1.35 (0.48 to 2.23)    | ⊕⊕○○ <sub>h</sub><br>Low        |

| Comparisons  | GRADE                  |                               |                        |                               |                        |                                  |
|--------------|------------------------|-------------------------------|------------------------|-------------------------------|------------------------|----------------------------------|
|              | Direct evidence        |                               | Indirect evidence      |                               | Network meta-analysis  |                                  |
|              | MD (95% CI)            | Certainty of evidence         | MD (95% CI)            | Certainty of evidence         | MD (95% CI)            | Certainty of evidence            |
| MET          | -                      | -                             | 0.25 (-0.27 to 0.77)   | ⊕⊕○○ <sup>h</sup><br>Low      | 0.25 (-0.27 to 0.77)   | ⊕○○○ <sup>e, h</sup><br>Very low |
| Clindamycin  | -                      | -                             | 0.20 (-0.44 to 0.84)   | ⊕⊕⊕○ <sup>g</sup><br>Moderate | 0.20 (-0.44 to 0.84)   | ⊕⊕○○ <sup>e, g</sup><br>Low      |
| AMOX+MET     | - 0.11 (-0.64 to 0.42) | ⊕⊕⊕○ <sup>e</sup><br>Moderate | -0.39 (-0.90 to 0.11)  | ⊕○○○ <sup>i</sup><br>Very low | -0.26 (-0.62 to 0.10)  | ⊕○○○ <sup>e, i</sup><br>Very low |
| DOX          | -                      | -                             | -0.29 (-0.84 to 0.25)  | ⊕○○○ <sup>i</sup><br>Very low | -0.29 (-0.84 to 0.25)  | ⊕○○○ <sup>e, i</sup><br>Very low |
| AZ           | -                      | -                             | -0.53 (-0.93 to -0.13) | ⊕○○○ <sup>i</sup><br>Very low | -0.53 (-0.93 to -0.13) | ⊕○○○ <sup>i</sup><br>Very low    |
| CLM          | -                      | -                             | -0.61 (-1.06 to -0.15) | ⊕○○○ <sup>i</sup><br>Very low | -0.61 (-1.06 to -0.15) | ⊕○○○ <sup>i</sup><br>Very low    |
| MINO HCl     | -                      | -                             | -0.65 (-1.30 to 0.00)  | ⊕⊕⊕○ <sup>g</sup><br>Moderate | -0.65 (-1.30 to 0.00)  | ⊕⊕○○ <sup>e, h</sup><br>Low      |
| SD alone     | -0.81 (-1.17 to -0.45) | ⊕⊕⊕○ <sup>c</sup><br>Moderate | 0.01 (-0.99 to 1.02)   | ⊕⊕⊕○ <sup>g</sup><br>Moderate | -0.72 (-1.06 to -0.38) | ⊕⊕⊕○ <sup>g</sup><br>Moderate    |
| AMOX+MET vs. |                        |                               |                        |                               |                        |                                  |
| SZ           | -                      | -                             | 1.61 (0.78 to 2.44)    | ⊕○○○ <sup>i</sup><br>Very low | 1.61 (0.78 to 2.44)    | ⊕○○○ <sup>i</sup><br>Very low    |
| MET          | 0.21 (-0.45 to 0.87)   | ⊕⊕○○ <sup>a, e</sup><br>Low   | 0.71 (0.17 to 1.25)    | ⊕○○○ <sup>i</sup><br>Very low | 0.51 (0.09 to 0.93)    | ⊕○○○ <sup>i</sup><br>Very low    |
| Clindamycin  | -                      | -                             | 0.46 (-0.10 to 1.03)   | ⊕○○○ <sup>i</sup><br>Very low | 0.46 (-0.10 to 1.03)   | ⊕○○○ <sup>e, i</sup><br>Very low |
| MOX          | 0.11 (-0.42 to 0.64)   | ⊕⊕⊕○ <sup>e</sup><br>Moderate | 0.39 (-0.11 to 0.90)   | ⊕○○○ <sup>i</sup><br>Very low | 0.26 (-0.10 to 0.62)   | ⊕○○○ <sup>e, i</sup><br>Very low |
| DOX          | -0.11 (-0.87 to 0.65)  | ⊕⊕○○ <sup>a, e</sup><br>Low   | 0.01 (-0.57 to 0.58)   | ⊕○○○ <sup>i</sup><br>Very low | -0.04 (-0.49 to 0.42)  | ⊕○○○ <sup>e, i</sup><br>Very low |
| AZ           | -                      | -                             | -0.27 (-0.56 to 0.01)  | ⊕○○○ <sup>i</sup><br>Very low | -0.27 (-0.56 to 0.01)  | ⊕○○○ <sup>e, i</sup><br>Very low |
| CLM          | -                      | -                             | -0.35 (-0.70 to 0.01)  | ⊕○○○ <sup>i</sup><br>Very low | -0.35 (-0.70 to 0.01)  | ⊕○○○ <sup>e, i</sup><br>Very low |
| MINO HCl     | -                      | -                             | -0.39 (-0.97 to 0.20)  | ⊕○○○ <sup>i</sup><br>Very low | -0.39 (-0.97 to 0.20)  | ⊕○○○ <sup>e, i</sup><br>Very low |

| Comparisons    | GRADE                  |                                |                        |                       |                        |                          |
|----------------|------------------------|--------------------------------|------------------------|-----------------------|------------------------|--------------------------|
|                | Direct evidence        |                                | Indirect evidence      |                       | Network meta-analysis  |                          |
|                | MD (95% CI)            | Certainty of evidence          | MD (95% CI)            | Certainty of evidence | MD (95% CI)            | Certainty of evidence    |
| SD alone       | -0.45 (-0.64 to -0.26) | ⊕○○○<br>a, d, e<br>Very low    | -0.70 (-1.78 to 0.38)  | ⊕○○○<br>i<br>Very low | -0.46 (-0.64 to -0.27) | ⊕○○○<br>i<br>Very low    |
| <b>DOX vs.</b> |                        |                                |                        |                       |                        |                          |
| SZ             | -                      | -                              | 1.65 (0.73 to 2.57)    | ⊕○○○<br>i<br>Very low | 1.65 (0.73 to 2.57)    | ⊕○○○<br>i<br>Very low    |
| MET            | 0.56 (-0.11 to 1.01)   | ⊕○○○<br>a, c, d, e<br>Very low | -5.32 (-13.60 to 2.96) | ⊕○○○<br>i<br>Very low | 0.54 (0.10 to 0.99)    | ⊕○○○<br>i<br>Very low    |
| Clindamycin    | 0.50 (-0.09 to 1.09)   | ⊕⊕⊕○<br>e<br>Moderate          | 0.47 (-1.11 to 2.08)   | ⊕○○○<br>i<br>Very low | 0.50 (-0.06 to 1.05)   | ⊕○○○<br>e, i<br>Very low |
| MOX            | -                      | -                              | 0.29 (-0.25 to 0.84)   | ⊕○○○<br>i<br>Very low | 0.29 (-0.25 to 0.84)   | ⊕○○○<br>e, i<br>Very low |
| AMOX+MET       | 0.11 (-0.65 to 0.87)   | ⊕⊕○○<br>a, e<br>Low            | -0.01 (-0.58 to 0.57)  | ⊕○○○<br>i<br>Very low | 0.04 (-0.42 to 0.49)   | ⊕○○○<br>e, h<br>Very low |
| AZ             | -                      | -                              | -0.24 (-0.72 to 0.24)  | ⊕○○○<br>i<br>Very low | -0.24 (-0.72 to 0.24)  | ⊕○○○<br>e, i<br>Very low |
| CLM            | -                      | -                              | -0.31 (-0.84 to 0.22)  | ⊕○○○<br>i<br>Very low | -0.31 (-0.84 to 0.22)  | ⊕○○○<br>e, i<br>Very low |
| MINO HCl       | -                      | -                              | -0.35 (-1.05 to 0.35)  | ⊕○○○<br>i<br>Very low | -0.35 (-1.05 to 0.35)  | ⊕○○○<br>e, i<br>Very low |
| SD alone       | -0.49 (-0.94 to -0.04) | ⊕○○○<br>a, d, e<br>Very low    | 0.37 (-1.18 to 1.92)   | ⊕○○○<br>i<br>Very low | -0.42 (-0.85 to 0.01)  | ⊕○○○<br>e, i<br>Very low |
| <b>AZ vs.</b>  |                        |                                |                        |                       |                        |                          |
| SZ             | -                      | -                              | 1.89 (1.05 to 2.72)    | ⊕○○○<br>i<br>Very low | 1.89 (1.05 to 2.72)    | ⊕○○○<br>i<br>Very low    |
| MET            | -                      | -                              | 0.78 (0.34 to 1.23)    | ⊕○○○<br>i<br>Very low | 0.78 (0.34 to 1.23)    | ⊕○○○<br>i<br>Very low    |
| Clindamycin    | -                      | -                              | 0.74 (0.15 to 1.32)    | ⊕○○○<br>i<br>Very low | 0.74 (0.15 to 1.32)    | ⊕○○○<br>i<br>Very low    |
| MOX            | -                      | -                              | 0.53 (0.13 to 0.93)    | ⊕○○○<br>i<br>Very low | 0.53 (0.13 to 0.93)    | ⊕○○○<br>i<br>Very low    |
| AMOX+MET       | -                      | -                              | 0.27 (-0.01 to 0.56)   | ⊕○○○<br>i<br>Very low | 0.27 (-0.01 to 0.56)   | ⊕○○○<br>e, i<br>Very low |
| DOX            | -                      | -                              | 0.24 (-0.24 to 0.72)   | ⊕○○○<br>i<br>Very low | 0.24 (-0.24 to 0.72)   | ⊕○○○<br>e, i<br>Very low |

| Comparisons         | GRADE                 |                                        |                       |                               |                       |                                  |
|---------------------|-----------------------|----------------------------------------|-----------------------|-------------------------------|-----------------------|----------------------------------|
|                     | Direct evidence       |                                        | Indirect evidence     |                               | Network meta-analysis |                                  |
|                     | MD (95% CI)           | Certainty of evidence                  | MD (95% CI)           | Certainty of evidence         | MD (95% CI)           | Certainty of evidence            |
| CLM                 | -                     | -                                      | -0.07 (-0.44 to 0.30) | ⊕○○○ <sub>i</sub><br>Very low | -0.07 (-0.44 to 0.30) | ⊕○○○ <sub>e, i</sub><br>Very low |
| MINO HCl            | -                     | -                                      | -0.11 (-0.70 to 0.48) | ⊕○○○ <sub>i</sub><br>Very low | -0.11 (-0.70 to 0.48) | ⊕○○○ <sub>e, i</sub><br>Very low |
| SD alone            | -0.18 (-0.39 to 0.03) | ⊕○○○ <sub>a, c, d, e</sub><br>Very low | -                     | -                             | -0.18 (-0.39 to 0.03) | ⊕○○○ <sub>e, i</sub><br>Very low |
| <b>CLM vs.</b>      |                       |                                        |                       |                               |                       |                                  |
| SZ                  | -                     | -                                      | 1.96 (1.10 to 2.82)   | ⊕○○○ <sub>i</sub><br>Very low | 1.96 (1.10 to 2.82)   | ⊕○○○ <sub>i</sub><br>Very low    |
| MET                 | -                     | -                                      | 0.86 (0.36 to 1.35)   | ⊕○○○ <sub>i</sub><br>Very low | 0.86 (0.36 to 1.35)   | ⊕○○○ <sub>i</sub><br>Very low    |
| Clindamycin         | -                     | -                                      | 0.81 (0.19 to 1.43)   | ⊕○○○ <sub>i</sub><br>Very low | 0.81 (0.19 to 1.43)   | ⊕○○○ <sub>i</sub><br>Very low    |
| MOX                 | -                     | -                                      | 0.61 (0.15 to 1.06)   | ⊕○○○ <sub>i</sub><br>Very low | 0.61 (0.15 to 1.06)   | ⊕○○○ <sub>i</sub><br>Very low    |
| AMOX+MET            | -                     | -                                      | 0.35 (-0.01 to 0.70)  | ⊕○○○ <sub>i</sub><br>Very low | 0.35 (-0.01 to 0.70)  | ⊕○○○ <sub>e, i</sub><br>Very low |
| DOX                 | -                     | -                                      | 0.31 (-0.22 to 0.84)  | ⊕○○○ <sub>i</sub><br>Very low | 0.31 (-0.22 to 0.84)  | ⊕○○○ <sub>e, i</sub><br>Very low |
| AZ                  | -                     | -                                      | 0.07 (-0.30 to 0.44)  | ⊕○○○ <sub>i</sub><br>Very low | 0.07 (-0.30 to 0.44)  | ⊕○○○ <sub>e, i</sub><br>Very low |
| MINO HCl            | -                     | -                                      | -0.04 (-0.67 to 0.59) | ⊕○○○ <sub>i</sub><br>Very low | -0.04 (-0.67 to 0.59) | ⊕○○○ <sub>e, i</sub><br>Very low |
| SD alone            | -0.11 (-0.41 to 0.19) | ⊕○○○ <sub>c, d, e</sub><br>Very low    | -                     | -                             | -0.11 (-0.41 to 0.19) | ⊕○○○ <sub>e, i</sub><br>Very low |
| <b>MINO HCl vs.</b> |                       |                                        |                       |                               |                       |                                  |
| SZ                  | -                     | -                                      | 2.00 (1.02 to 2.98)   | ⊕⊕○○ <sub>h</sub><br>Low      | 2.00 (1.02 to 2.98)   | ⊕⊕○○ <sub>h</sub><br>Low         |
| MET                 | -                     | -                                      | 0.90 (0.22 to 1.58)   | ⊕⊕○○ <sub>h</sub><br>Low      | 0.90 (0.22 to 1.58)   | ⊕⊕○○ <sub>h</sub><br>Low         |
| Clindamycin         | -                     | -                                      | 0.85 (0.07 to 1.62)   | ⊕⊕⊕○ <sub>g</sub><br>Moderate | 0.85 (0.07 to 1.62)   | ⊕⊕⊕○ <sub>g</sub><br>Moderate    |
| MOX                 | -                     | -                                      | 0.65 (0.00 to 1.30)   | ⊕⊕⊕○ <sub>g</sub><br>Moderate | 0.65 (0.00 to 1.30)   | ⊕⊕○○ <sub>e, g</sub><br>Low      |

| Comparisons  | GRADE                 |                                        |                       |                               |                       |                                  |
|--------------|-----------------------|----------------------------------------|-----------------------|-------------------------------|-----------------------|----------------------------------|
|              | Direct evidence       |                                        | Indirect evidence     |                               | Network meta-analysis |                                  |
|              | MD (95% CI)           | Certainty of evidence                  | MD (95% CI)           | Certainty of evidence         | MD (95% CI)           | Certainty of evidence            |
| AMOX+MET     | -                     | -                                      | 0.39 (-0.20 to 0.97)  | ⊕○○○ <sub>i</sub><br>Very low | 0.39 (-0.20 to 0.97)  | ⊕○○○ <sub>e, i</sub><br>Very low |
| DOX          | -                     | -                                      | 0.35 (-0.35 to 1.05)  | ⊕○○○ <sub>i</sub><br>Very low | 0.35 (-0.35 to 1.05)  | ⊕○○○ <sub>e, i</sub><br>Very low |
| AZ           | -                     | -                                      | 0.11 (-0.48 to 0.70)  | ⊕○○○ <sub>i</sub><br>Very low | 0.11 (-0.48 to 0.70)  | ⊕○○○ <sub>e, i</sub><br>Very low |
| CLM          | -                     | -                                      | 0.04 (-0.59 to 0.67)  | ⊕○○○ <sub>i</sub><br>Very low | 0.04 (-0.59 to 0.67)  | ⊕○○○ <sub>e, i</sub><br>Very low |
| SD alone     | -0.07 (-0.62 to 0.48) | ⊕⊕⊕○ <sub>e</sub><br>Moderate          | -                     | -                             | -0.07 (-0.62 to 0.48) | ⊕⊕○○ <sub>e, g</sub><br>Low      |
| SD alone vs. |                       |                                        |                       |                               |                       |                                  |
| SZ           | 2.07 (1.26 to 2.88)   | ⊕⊕○○ <sub>b</sub><br>Low               | -                     | -                             | 2.07 (1.26 to 2.88)   | ⊕⊕○○ <sub>h</sub><br>Low         |
| MET          | 0.99 (0.58 to 1.40)   | ⊕⊕○○ <sub>a, c</sub><br>Low            | 0.71 (-0.62 to 2.04)  | ⊕⊕○○ <sub>h</sub><br>Low      | 0.97 (0.57 to 1.36)   | ⊕⊕○○ <sub>h</sub><br>Low         |
| Clindamycin  | 1.10 (0.50 to 1.70)   | ⊕⊕⊕○ <sub>a</sub><br>Moderate          | 0.11 (-1.16 to 1.37)  | ⊕⊕⊕○ <sub>g</sub><br>Moderate | 0.92 (0.38 to 1.46)   | ⊕⊕⊕○ <sub>g</sub><br>Moderate    |
| MOX          | 0.81 (0.45 to 1.17)   | ⊕⊕⊕○ <sub>c</sub><br>Moderate          | -0.01 (-1.02 to 0.99) | ⊕⊕⊕○ <sub>g</sub><br>Moderate | 0.72 (0.38 to 1.06)   | ⊕⊕⊕○ <sub>g</sub><br>Moderate    |
| AMOX+MET     | 0.45 (0.26 to 0.64)   | ⊕○○○ <sub>a, d, e</sub><br>Very low    | 0.70 (-0.38 to 1.78)  | ⊕○○○ <sub>i</sub><br>Very low | 0.46 (0.27 to 0.64)   | ⊕○○○ <sub>i</sub><br>Very low    |
| DOX          | 0.49 (0.04 to 0.94)   | ⊕○○○ <sub>a, d, e</sub><br>Very low    | -0.37 (-1.92 to 1.18) | ⊕○○○ <sub>i</sub><br>Very low | 0.42 (-0.01 to 0.85)  | ⊕○○○ <sub>e, i</sub><br>Very low |
| AZ           | 0.18 (0.03 to -0.39)  | ⊕○○○ <sub>a, c, d, e</sub><br>Very low | -                     | -                             | 0.18 (-0.03 to 0.39)  | ⊕○○○ <sub>e, i</sub><br>Very low |
| CLM          | 0.11 (0.19 to -0.41)  | ⊕○○○ <sub>c, d, e</sub><br>Very low    | -                     | -                             | 0.11 (-0.19 to 0.41)  | ⊕○○○ <sub>e, i</sub><br>Very low |
| MINO HCl     | 0.07 (-0.48 to 0.62)  | ⊕⊕⊕○ <sub>e</sub><br>Moderate          | -                     | -                             | 0.07 (-0.48 to 0.62)  | ⊕⊕○○ <sub>e, g</sub><br>Low      |

<sup>a</sup> serious risk of bias; <sup>b</sup> very serious risk of bias; <sup>c</sup> serious inconsistency; <sup>d</sup> serious indirectness <sup>e</sup> serious imprecision; <sup>f</sup> publication bias; <sup>g</sup> contributing evidence of moderate quality; <sup>h</sup> contributing evidence of low quality; <sup>i</sup> contributing evidence of very low quality; <sup>j</sup> contributing evidence of high quality; <sup>k</sup> incoherence

**Table S26.** Certainty of evidence for long-term CAL gain following the use of systemic antibiotics as adjunct to subgingival debridement

| Comparisons     | GRADE                  |                               |                        |                                |                        |                                   |
|-----------------|------------------------|-------------------------------|------------------------|--------------------------------|------------------------|-----------------------------------|
|                 | Direct evidence        |                               | Indirect evidence      |                                | Network meta-analysis  |                                   |
|                 | MD (95% CI)            | Certainty of evidence         | MD (95% CI)            | Certainty of evidence          | MD (95% CI)            | Certainty of evidence             |
| MET vs.         |                        |                               |                        |                                |                        |                                   |
| Clindamycin     | -0.30 (-0.69 to 0.09)  | ⊕⊕⊕○ <sup>a</sup><br>Moderate | -                      | -                              | -0.30 (-0.69 to 0.09)  | ⊕⊕○○ <sup>e, g</sup><br>Low       |
| DOX             | -1.30 (-1.69 to -0.91) | ⊕⊕⊕○ <sup>a</sup><br>Moderate | -                      | -                              | -1.30 (-1.69 to -0.91) | ⊕⊕⊕○ <sup>g</sup><br>Moderate     |
| AMOX+MET        | -                      | -                             | -1.37 (-1.77 to -0.97) | ⊕⊕○○○ <sup>h</sup><br>Low      | -1.37 (-1.77 to -0.97) | ⊕⊕○○○ <sup>h</sup><br>Low         |
| SD alone        | -1.80 (-2.18 to -1.42) | ⊕⊕⊕○ <sup>a</sup><br>Moderate | -                      | -                              | -1.80 (-2.18 to -1.42) | ⊕⊕⊕○ <sup>g</sup><br>Moderate     |
| AZ              | -                      | -                             | -1.85 (-2.29 to -1.40) | ⊕○○○○ <sup>i</sup><br>Very low | -1.85 (-2.29 to -1.40) | ⊕○○○○ <sup>i</sup><br>Very low    |
| Clindamycin vs. |                        |                               |                        |                                |                        |                                   |
| MET             | 0.30 (-0.09 to 0.69)   | ⊕⊕⊕○ <sup>a</sup><br>Moderate | -                      | -                              | 0.30 (-0.09 to 0.69)   | ⊕⊕○○○ <sup>e, g</sup><br>Low      |
| DOX             | -1.00 (-1.41to-0.59)   | ⊕⊕⊕○ <sup>a</sup><br>Moderate | -                      | -                              | -1.00 (-1.41 to -0.59) | ⊕⊕⊕○ <sup>g</sup><br>Moderate     |
| AMOX+MET        | -                      | -                             | -1.07 (-1.49 to -0.65) | ⊕⊕○○○ <sup>h</sup><br>Low      | -1.07 (-1.49 to -0.65) | ⊕⊕○○○ <sup>h</sup><br>Low         |
| SD alone        | -1.50 (-1.90to-1.10)   | ⊕⊕⊕○ <sup>a</sup><br>Moderate | -                      | -                              | -1.50 (-1.90 to -1.10) | ⊕⊕⊕○ <sup>g</sup><br>Moderate     |
| AZ              | -                      | -                             | -1.55 (-2.01to-1.08)   | ⊕○○○○ <sup>i</sup><br>Very low | -1.55 (-2.01 to -1.08) | ⊕○○○○ <sup>i</sup><br>Very low    |
| DOX vs.         |                        |                               |                        |                                |                        |                                   |
| MET             | 1.30 (0.91 to 1.69)    | ⊕⊕⊕○ <sup>a</sup><br>Moderate | -                      | -                              | 1.30 (0.91 to 1.69)    | ⊕⊕⊕○ <sup>g</sup><br>Moderate     |
| Clindamycin     | 1.00 (0.59 to 1.41)    | ⊕⊕⊕○ <sup>a</sup><br>Moderate | -                      | -                              | 1.00 (0.59 to 1.41)    | ⊕⊕⊕○ <sup>g</sup><br>Moderate     |
| AMOX+MET        | -                      | -                             | -0.07 (-0.49 to 0.35)  | ⊕⊕○○○ <sup>h</sup><br>Low      | -0.07 (-0.49 to 0.35)  | ⊕○○○○ <sup>e, h</sup><br>Very low |
| SD alone        | -0.50 (-0.90 to -0.10) | ⊕⊕⊕○ <sup>a</sup><br>Moderate | -                      | -                              | -0.50 (-0.90 to -0.10) | ⊕⊕⊕○ <sup>g</sup><br>Moderate     |
| AZ              | -                      | -                             | -0.55 (-1.01 to -0.09) | ⊕○○○○ <sup>i</sup><br>Very low | -0.55 (-1.01 to -0.09) | ⊕○○○○ <sup>i</sup><br>Very low    |
| AMOX+MET vs.    |                        |                               |                        |                                |                        |                                   |

| Comparisons  | GRADE                  |                                        |                        |                               |                        |                                  |
|--------------|------------------------|----------------------------------------|------------------------|-------------------------------|------------------------|----------------------------------|
|              | Direct evidence        |                                        | Indirect evidence      |                               | Network meta-analysis  |                                  |
|              | MD (95% CI)            | Certainty of evidence                  | MD (95% CI)            | Certainty of evidence         | MD (95% CI)            | Certainty of evidence            |
| MET          | -                      | -                                      | 1.37 (0.97 to 1.77)    | ⊕⊕○○ <sup>h</sup><br>Low      | 1.37 (0.97 to 1.77)    | ⊕⊕○○ <sup>h</sup><br>Low         |
| Clindamycin  | -                      | -                                      | 1.07 (0.65 to 1.49)    | ⊕⊕○○ <sup>h</sup><br>Low      | 1.07 (0.65 to 1.49)    | ⊕⊕○○ <sup>h</sup><br>Low         |
| DOX          | -                      | -                                      | 0.07 (-0.35 to 0.49)   | ⊕⊕○○ <sup>h</sup><br>Low      | 0.07 (-0.35 to 0.49)   | ⊕○○○ <sup>e, h</sup><br>Very low |
| SD alone     | -0.43 (-0.56 to -0.29) | ⊕⊕○○ <sup>b</sup><br>Low               | -                      | -                             | -0.43 (-0.56 to -0.29) | ⊕⊕○○ <sup>h</sup><br>Low         |
| AZ           | -                      | -                                      | -0.47 (-0.74 to -0.20) | ⊕○○○ <sup>i</sup><br>Very low | -0.47 (-0.74 to -0.20) | ⊕○○○ <sup>i</sup><br>Very low    |
| SD alone vs. |                        |                                        |                        |                               |                        |                                  |
| MET          | 1.80 (1.42 to 2.18)    | ⊕⊕⊕○ <sup>a</sup><br>Moderate          | -                      | -                             | 1.80 (1.42 to 2.18)    | ⊕⊕⊕○ <sup>g</sup><br>Moderate    |
| Clindamycin  | 1.50 (1.10 to 1.90)    | ⊕⊕⊕○ <sup>a</sup><br>Moderate          | -                      | -                             | 1.50 (1.10 to 1.90)    | ⊕⊕⊕○ <sup>g</sup><br>Moderate    |
| DOX          | 0.50 (0.10 to 0.90)    | ⊕⊕⊕○ <sup>a</sup><br>Moderate          | -                      | -                             | 0.50 (0.10 to 0.90)    | ⊕⊕⊕○ <sup>g</sup><br>Moderate    |
| AMOX+MET     | 0.43 (0.29 to 0.56)    | ⊕⊕○○ <sup>b</sup><br>Low               | -                      | -                             | 0.43 (0.29 to 0.56)    | ⊕⊕○○ <sup>h</sup><br>Low         |
| AZ           | -0.05 (-0.28 to 0.19)  | ⊕⊕○○ <sup>a, c, d, e</sup><br>Very low | -                      | -                             | -0.05 (-0.28 to 0.19)  | ⊕○○○ <sup>e, i</sup><br>Very low |
| AZ vs.       |                        |                                        |                        |                               |                        |                                  |
| MET          | -                      | -                                      | 1.85 (1.08 to 2.29)    | ⊕○○○ <sup>i</sup><br>Very low | 1.85 (1.08 to 2.29)    | ⊕○○○ <sup>i</sup><br>Very low    |
| Clindamycin  | -                      | -                                      | 1.55 (1.08 to 2.01)    | ⊕○○○ <sup>i</sup><br>Very low | 1.55 (1.08 to 2.01)    | ⊕○○○ <sup>i</sup><br>Very low    |
| DOX          | -                      | -                                      | 0.55 (0.09 to 1.01)    | ⊕○○○ <sup>i</sup><br>Very low | 0.55 (0.09 to 1.01)    | ⊕○○○ <sup>i</sup><br>Very low    |
| AMOX+MET     | -                      | -                                      | 0.47 (0.20 to 0.74)    | ⊕○○○ <sup>i</sup><br>Very low | 0.47 (0.20 to 0.74)    | ⊕○○○ <sup>i</sup><br>Very low    |
| SD alone     | 0.05 (-0.19 to 0.28)   | ⊕⊕○○ <sup>a, c, d, e</sup><br>Very low | -                      | -                             | 0.05 (-0.19 to 0.28)   | ⊕○○○ <sup>e, i</sup><br>Very low |

<sup>a</sup> serious risk of bias; <sup>b</sup> very serious risk of bias; <sup>c</sup> serious inconsistency; <sup>d</sup> serious indirectness <sup>e</sup> serious imprecision; <sup>f</sup> publication bias; <sup>g</sup> contributing evidence of moderate quality; <sup>h</sup> contributing evidence of low quality; <sup>i</sup> contributing evidence of very low quality; <sup>j</sup> contributing evidence of high quality; <sup>k</sup> incoherence

**Table S27.** Certainty of evidence for short-term PPD reduction following the use of systemic antibiotics as adjunct to subgingival debridement

| Comparisons    | GRADE                  |                                        |                        |                               |                        |                                  |
|----------------|------------------------|----------------------------------------|------------------------|-------------------------------|------------------------|----------------------------------|
|                | Direct evidence        |                                        | Indirect evidence      |                               | Network meta-analysis  |                                  |
|                | MD (95% CI)            | Certainty of evidence                  | MD (95% CI)            | Certainty of evidence         | MD (95% CI)            | Certainty of evidence            |
| <b>SZ vs.</b>  |                        |                                        |                        |                               |                        |                                  |
| MET            | -                      | -                                      | -1.05 (-1.97 to -0.12) | ⊕⊕○○ <sup>h</sup><br>Low      | -1.05 (-1.97 to -0.12) | ⊕⊕○○ <sup>h</sup><br>Low         |
| MOX            | -                      | -                                      | -1.05 (-1.98 to -0.12) | ⊕⊕○○ <sup>h</sup><br>Low      | -1.05 (-1.98 to -0.12) | ⊕⊕○○ <sup>h</sup><br>Low         |
| AMOX+MET       | -                      | -                                      | -1.11 (-1.89 to -0.32) | ⊕○○○ <sup>i</sup><br>Very low | -1.11 (-1.89 to -0.32) | ⊕○○○ <sup>i</sup><br>Very low    |
| CLM            | -                      | -                                      | -1.09 (-2.04 to -0.14) | ⊕○○○ <sup>i</sup><br>Very low | -1.09 (-2.04 to -0.14) | ⊕○○○ <sup>i</sup><br>Very low    |
| CEF            | -                      | -                                      | -1.36 (-2.40 to -0.32) | ⊕○○○ <sup>i</sup><br>Very low | -1.36 (-2.40 to -0.32) | ⊕○○○ <sup>i</sup><br>Very low    |
| SEC            | -                      | -                                      | -1.46 (-2.58 to -0.33) | ⊕⊕○○ <sup>h</sup><br>Low      | -1.46 (-2.58 to -0.33) | ⊕⊕○○ <sup>h</sup><br>Low         |
| MINO HCl       | -                      | -                                      | -1.47 (-2.45 to -0.49) | ⊕⊕○○ <sup>h</sup><br>Low      | -1.47 (-2.45 to -0.49) | ⊕⊕○○ <sup>h</sup><br>Low         |
| AZ             | -                      | -                                      | -1.49 (-2.28 to -0.69) | ⊕○○○ <sup>i</sup><br>Very low | -1.49 (-2.28 to -0.69) | ⊕○○○ <sup>i</sup><br>Very low    |
| DOX            | -                      | -                                      | -1.66 (-2.71 to -0.61) | ⊕⊕○○ <sup>h</sup><br>Low      | -1.66 (-2.71 to -0.61) | ⊕⊕○○ <sup>h</sup><br>Low         |
| SD alone       | -1.66 (-2.41 to -0.91) | ⊕⊕○○ <sup>b</sup><br>Low               | -                      | -                             | -1.66 (-2.41 to -0.91) | ⊕⊕○○ <sup>h</sup><br>Low         |
| <b>MET vs.</b> |                        |                                        |                        |                               |                        |                                  |
| SZ             | -                      | -                                      | 1.05 (0.12 to 1.97)    | ⊕⊕○○ <sup>h</sup><br>Low      | 1.05 (0.12 to 1.97)    | ⊕⊕○○ <sup>h</sup><br>Low         |
| MOX            | -                      |                                        | -0.01 (-0.76 to 0.75)  | ⊕⊕○○ <sup>h</sup><br>Low      | -0.01 (-0.76 to 0.75)  | ⊕○○○ <sup>e, h</sup><br>Very low |
| AMOX+MET       | 0.13 (-0.48 to 0.74)   | ⊕○○○ <sup>a, c, d, e</sup><br>Very low | -0.75 (-1.90 to 0.40)  | ⊕○○○ <sup>i</sup><br>Very low | -0.06 (-0.60 to 0.48)  | ⊕○○○ <sup>e, i</sup><br>Very low |
| CLM            | -                      | -                                      | -0.05 (-0.84 to 0.75)  | ⊕○○○ <sup>i</sup><br>Very low | -0.05 (-0.84 to 0.75)  | ⊕○○○ <sup>e, i</sup><br>Very low |
| CEF            | -                      | -                                      | -0.31 (-1.19 to 0.57)  | ⊕○○○ <sup>i</sup><br>Very low | -0.31 (-1.19 to 0.57)  | ⊕○○○ <sup>e, i</sup><br>Very low |



| Comparisons  | GRADE                  |                               |                       |                               |                        |                                  |
|--------------|------------------------|-------------------------------|-----------------------|-------------------------------|------------------------|----------------------------------|
|              | Direct evidence        |                               | Indirect evidence     |                               | Network meta-analysis  |                                  |
|              | MD (95% CI)            | Certainty of evidence         | MD (95% CI)           | Certainty of evidence         | MD (95% CI)            | Certainty of evidence            |
| SEC          | -                      | -                             | -0.41 (-1.41 to 0.59) | ⊕⊕○○ <sub>h</sub><br>Low      | -0.41 (-1.41 to 0.59)  | ⊕○○○ <sub>e, h</sub><br>Very low |
| MINO HCl     | -                      | -                             | -0.43 (-1.25 to 0.40) | ⊕⊕○○ <sub>h</sub><br>Low      | -0.43 (-1.25 to 0.40)  | ⊕○○○ <sub>e, h</sub><br>Very low |
| AZ           | -                      | -                             | -0.44 (-1.03 to 0.15) | ⊕○○○ <sub>i</sub><br>Very low | -0.44 (-1.03 to 0.15)  | ⊕○○○ <sub>e, i</sub><br>Very low |
| DOX          | -                      | -                             | -1.34 (-3.31 to 0.63) | ⊕⊕○○ <sub>h</sub><br>Low      | -0.61 (-1.39 to 0.16)  | ⊕○○○ <sub>e, h</sub><br>Very low |
| SD alone     | -0.80 (-1.40 to -0.19) | ⊕⊕○○ <sub>a, e</sub><br>Low   | 0.12 (-1.07 to 1.31)  | ⊕⊕○○ <sub>h</sub><br>Low      | -0.61 (-1.15 to -0.07) | ⊕○○○ <sub>e, h</sub><br>Very low |
| MOX vs.      |                        |                               |                       |                               |                        |                                  |
| SZ           | -                      | -                             | 1.05 (0.12 to 1.98)   | ⊕⊕○○ <sub>h</sub><br>Low      | 1.05 (0.12 to 1.98)    | ⊕⊕○○ <sub>h</sub><br>Low         |
| MET          | -                      | -                             | 0.01 (-0.75 to 0.76)  | ⊕⊕○○ <sub>h</sub><br>Low      | 0.01 (-0.75 to 0.76)   | ⊕○○○ <sub>e, i</sub><br>Very low |
| AMOX+MET     | 0.09 (-0.74 to 0.92)   | ⊕⊕⊕○ <sub>e</sub><br>Moderate | -0.18 (-0.96 to 0.60) | ⊕○○○ <sub>i</sub><br>Very low | -0.05 (-0.62 to 0.51)  | ⊕⊕○○ <sub>e, g</sub><br>Low      |
| CLM          | -                      | -                             | -0.04 (-0.84 to 0.76) | ⊕○○○ <sub>i</sub><br>Very low | -0.04 (-0.84 to 0.76)  | ⊕○○○ <sub>e, i</sub><br>Very low |
| CEF          | -                      | -                             | -0.30 (-1.20 to 0.59) | ⊕○○○ <sub>i</sub><br>Very low | -0.30 (-1.20 to 0.59)  | ⊕○○○ <sub>e, i</sub><br>Very low |
| SEC          | -                      | -                             | -0.40 (-1.41 to 0.60) | ⊕⊕○○ <sub>h</sub><br>Low      | -0.40 (-1.41 to 0.60)  | ⊕○○○ <sub>e, h</sub><br>Very low |
| MINO HCl     | -                      | -                             | -0.42 (-1.25 to 0.41) | ⊕⊕○○ <sub>h</sub><br>Low      | -0.42 (-1.25 to 0.41)  | ⊕○○○ <sub>e, h</sub><br>Very low |
| AZ           | -                      | -                             | -0.43 (-1.04 to 0.17) | ⊕○○○ <sub>i</sub><br>Very low | -0.43 (-1.04 to 0.17)  | ⊕○○○ <sub>e, i</sub><br>Very low |
| DOX          | -                      | -                             | -0.61 (-1.51 to 0.30) | ⊕○○○ <sub>h</sub><br>Low      | -0.61 (-1.51 to 0.30)  | ⊕○○○ <sub>e, i</sub><br>Very low |
| SD alone     | -0.71 (-1.29 to -0.12) | ⊕⊕○○ <sub>a, d</sub><br>Low   | 0.10 (-1.43 to 1.62)  | ⊕⊕○○ <sub>h</sub><br>Low      | -0.60 (-1.15 to -0.06) | ⊕○○○ <sub>i</sub><br>Very low    |
| AMOX+MET vs. |                        |                               |                       |                               |                        |                                  |
| SZ           | -                      | -                             | 1.11 (0.32 to 1.89)   | ⊕○○○ <sub>i</sub><br>Very low | 1.11 (0.32 to 1.89)    | ⊕○○○ <sub>i</sub><br>Very low    |

| Comparisons | GRADE                  |                                           |                       |                                  |                        |                                  |
|-------------|------------------------|-------------------------------------------|-----------------------|----------------------------------|------------------------|----------------------------------|
|             | Direct evidence        |                                           | Indirect evidence     |                                  | Network meta-analysis  |                                  |
|             | MD (95% CI)            | Certainty of evidence                     | MD (95% CI)           | Certainty of evidence            | MD (95% CI)            | Certainty of evidence            |
| MET         | -0.13 (-0.74 to 0.48)  | ⊕○○○ <sub>a, c, d, e</sub><br>Very low    | 0.75 (-0.40 to 1.90)  | ⊕○○○ <sub>i</sub><br>Very low    | 0.06 (-0.48 to 0.60)   | ⊕○○○ <sub>e, i</sub><br>Very low |
| MOX         | -0.09 (-0.92 to .74)   | ⊕⊕⊕○ <sub>e</sub><br>Moderate             | 0.18 (-0.60 to 0.96)  | ⊕○○○ <sub>i</sub><br>Very low    | 0.05 (-0.51 to 0.62)   | ⊕⊕○○ <sub>e, g</sub><br>Low      |
| CLM         | -                      | -                                         | 0.02 (-0.62 to 0.65)  | ⊕○○○ <sub>i</sub><br>Very low    | 0.02 (-0.62 to 0.65)   | ⊕○○○ <sub>e, i</sub><br>Very low |
| CEF         | 0.01 (-0.81 to 0.83)   | ⊕○○○ <sub>b, e</sub><br>Very low          | -1.12 (-2.63 to 0.38) | ⊕○○○ <sub>i</sub><br>Very low    | -0.25 (-0.97 to 0.47)  | ⊕○○○ <sub>e, i</sub><br>Very low |
| SEC         | -                      | -                                         | -0.35 (-1.22 to 0.52) | ⊕○○○ <sub>i</sub><br>Very low    | -0.35 (-1.22 to 0.52)  | ⊕○○○ <sub>e, i</sub><br>Very low |
| MINO HCl    | -                      | -                                         | -0.36 (-1.03 to 0.31) | ⊕○○○ <sub>i</sub><br>Very low    | -0.36 (-1.03 to 0.31)  | ⊕○○○ <sub>e, i</sub><br>Very low |
| AZ          | -0.19 (-0.80 to 0.42)  | ⊕○○○ <sub>a, c, d, e</sub><br>Very low    | -0.46 (-0.88 to 0.06) | ⊕○○○ <sub>ei</sub><br>Very low   | -0.38 (-0.71 to -0.05) | ⊕○○○ <sub>i</sub><br>Very low    |
| DOX         | -0.43 (-1.29 to 0.43)  | ⊕⊕⊕○ <sub>a</sub><br>Moderate             | -0.86 (-2.24 to 0.51) | ⊕⊕○○ <sub>h</sub><br>Low         | -0.55 (-1.28 to 0.18)  | ⊕○○○ <sub>e, h</sub><br>Very low |
| SD alone    | -0.56 (-0.81 to -0.32) | ⊕○○○ <sub>a, c, d, e, f</sub><br>Very low | -0.27 (-1.33 to 0.79) | ⊕○○○ <sub>e, i</sub><br>Very low | -0.55 (-0.79 to -0.31) | ⊕○○○ <sub>i</sub><br>Very low    |
| CLM vs.     |                        |                                           |                       |                                  |                        |                                  |
| SZ          | -                      | -                                         | 1.09 (0.14 to 2.04)   | ⊕○○○ <sub>i</sub><br>Very low    | 1.09 (0.14 to 2.04)    | ⊕○○○ <sub>i</sub><br>Very low    |
| MET         | -                      | -                                         | 0.05 (-0.75 to 0.84)  | ⊕○○○ <sub>i</sub><br>Very low    | 0.05 (-0.75 to 0.84)   | ⊕○○○ <sub>e, i</sub><br>Very low |
| MOX         | -                      | -                                         | 0.04 (-0.76 to 0.84)  | ⊕○○○ <sub>i</sub><br>Very low    | 0.04 (-0.76 to 0.84)   | ⊕○○○ <sub>e, i</sub><br>Very low |
| AMOX+MET    | -                      | -                                         | -0.02 (-0.65 to 0.62) | ⊕○○○ <sub>i</sub><br>Very low    | -0.02 (-0.65 to 0.62)  | ⊕○○○ <sub>e, i</sub><br>Very low |
| CEF         | -                      | -                                         | -0.26 (-1.19 to 0.66) | ⊕○○○ <sub>i</sub><br>Very low    | -0.26 (-1.19 to 0.66)  | ⊕○○○ <sub>e, i</sub><br>Very low |
| SEC         | -                      | -                                         | -0.36 (-1.39 to 0.66) | ⊕○○○ <sub>i</sub><br>Very low    | -0.36 (-1.39 to 0.66)  | ⊕○○○ <sub>e, i</sub><br>Very low |
| MINO HCl    | -                      | -                                         | -0.38 (-1.24 to 0.48) | ⊕○○○ <sub>i</sub><br>Very low    | -0.38 (-1.24 to 0.48)  | ⊕○○○ <sub>e, i</sub><br>Very low |

| Comparisons | GRADE                 |                                     |                       |                               |                       |                                 |
|-------------|-----------------------|-------------------------------------|-----------------------|-------------------------------|-----------------------|---------------------------------|
|             | Direct evidence       |                                     | Indirect evidence     |                               | Network meta-analysis |                                 |
|             | MD (95% CI)           | Certainty of evidence               | MD (95% CI)           | Certainty of evidence         | MD (95% CI)           | Certainty of evidence           |
| AZ          | -                     | -                                   | -0.39 (-1.04 to 0.25) | ⊕○○○ <sub>i</sub><br>Very low | -0.39 (-1.04 to 0.25) | ⊕○○○ <sub>e,i</sub><br>Very low |
| DOX         | -                     | -                                   | -0.57 (-1.50 to 0.37) | ⊕○○○ <sub>i</sub><br>Very low | -0.57 (-1.50 to 0.37) | ⊕○○○ <sub>e,i</sub><br>Very low |
| SD alone    | -0.56 (-1.15 to 0.02) | ⊕○○○ <sub>a,c,d,e</sub><br>Very low | -                     | -                             | -0.56 (-1.15 to 0.02) | ⊕○○○ <sub>e,i</sub><br>Very low |
| CEF vs.     |                       |                                     |                       |                               |                       |                                 |
| SZ          | -                     | -                                   | 1.36 (0.32 to 2.40)   | ⊕○○○ <sub>i</sub><br>Very low | 1.36 (0.32 to 2.40)   | ⊕○○○ <sub>i</sub><br>Very low   |
| MET         | -                     | -                                   | 0.31 (-0.57 to 1.19)  | ⊕○○○ <sub>i</sub><br>Very low | 0.31 (-0.57 to 1.19)  | ⊕○○○ <sub>e,i</sub><br>Very low |
| MOX         | -                     | -                                   | 0.30 (-0.59 to 1.20)  | ⊕○○○ <sub>i</sub><br>Very low | 0.30 (-0.59 to 1.20)  | ⊕○○○ <sub>e,i</sub><br>Very low |
| AMOX+MET    | -0.01 (-0.83 to 0.81) | ⊕○○○ <sub>b,e</sub><br>Very low     | 1.12 (-0.38 to 2.63)  | ⊕○○○ <sub>i</sub><br>Very low | 0.25 (-0.47 to 0.97)  | ⊕○○○ <sub>e,i</sub><br>Very low |
| CLM         | -                     | -                                   | 0.26 (-0.66 to 1.19)  | ⊕○○○ <sub>i</sub><br>Very low | 0.26 (-0.66 to 1.19)  | ⊕○○○ <sub>e,i</sub><br>Very low |
| SEC         | -                     | -                                   | -0.10 (-1.21 to 1.01) | ⊕○○○ <sub>i</sub><br>Very low | -0.10 (-1.21 to 1.01) | ⊕○○○ <sub>e,i</sub><br>Very low |
| MINO HCl    | -                     | -                                   | -0.11 (-1.07 to 0.84) | ⊕○○○ <sub>i</sub><br>Very low | -0.11 (-1.07 to 0.84) | ⊕○○○ <sub>e,i</sub><br>Very low |
| AZ          | -                     | -                                   | -0.13 (-0.89 to 0.63) | ⊕○○○ <sub>i</sub><br>Very low | -0.13 (-0.89 to 0.63) | ⊕○○○ <sub>e,i</sub><br>Very low |
| DOX         | -                     | -                                   | -0.30 (-1.31 to 0.71) | ⊕⊕○○ <sub>h</sub><br>Low      | -0.30 (-1.31 to 0.71) | ⊕○○○ <sub>e,h</sub><br>Very low |
| SD alone    | -0.04 (-0.86 to 0.78) | ⊕○○○ <sub>b,e</sub><br>Very low     | -1.17 (-2.68 to 0.33) | ⊕○○○ <sub>i</sub><br>Very low | -0.30 (-1.02 to 0.42) | ⊕○○○ <sub>e,i</sub><br>Very low |
| SEC vs.     |                       |                                     |                       |                               |                       |                                 |
| SZ          | -                     | -                                   | 1.46 (0.33 to 2.58)   | ⊕⊕○○ <sub>h</sub><br>Low      | 1.46 (0.33 to 2.58)   | ⊕⊕○○ <sub>h</sub><br>Low        |
| MET         | -                     | -                                   | 0.41 (-0.59 to 1.41)  | ⊕⊕○○ <sub>h</sub><br>Low      | 0.41 (-0.59 to 1.41)  | ⊕○○○ <sub>e,h</sub><br>Very low |
| MOX         | -                     | -                                   | 0.40 (-0.60 to 1.41)  | ⊕⊕○○ <sub>h</sub><br>Low      | 0.40 (-0.60 to 1.41)  | ⊕○○○ <sub>e,h</sub><br>Very low |

| Comparisons         | GRADE                 |                            |                       |                               |                       |                                 |
|---------------------|-----------------------|----------------------------|-----------------------|-------------------------------|-----------------------|---------------------------------|
|                     | Direct evidence       |                            | Indirect evidence     |                               | Network meta-analysis |                                 |
|                     | MD (95% CI)           | Certainty of evidence      | MD (95% CI)           | Certainty of evidence         | MD (95% CI)           | Certainty of evidence           |
| AMOX+MET            | -                     | -                          | 0.35 (-0.52 to 1.22)  | ⊕○○○ <sub>i</sub><br>Very low | 0.35 (-0.52 to 1.22)  | ⊕○○○ <sub>e,i</sub><br>Very low |
| CLM                 | -                     | -                          | 0.36 (-0.66 to 1.39)  | ⊕○○○ <sub>i</sub><br>Very low | 0.36 (-0.66 to 1.39)  | ⊕○○○ <sub>e,i</sub><br>Very low |
| CEF                 | -                     | -                          | 0.10 (-1.01 to 1.21)  | ⊕○○○ <sub>i</sub><br>Very low | 0.10 (-1.01 to 1.21)  | ⊕○○○ <sub>e,i</sub><br>Very low |
| MINO HCl            | -                     | -                          | -0.02 (-1.06 to 1.03) | ⊕⊕○○ <sub>h</sub><br>Low      | -0.02 (-1.06 to 1.03) | ⊕○○○ <sub>e,h</sub><br>Very low |
| AZ                  | -                     | -                          | -0.03 (-0.91 to 0.85) | ⊕○○○ <sub>i</sub><br>Very low | -0.03 (-0.91 to 0.85) | ⊕○○○ <sub>e,i</sub><br>Very low |
| DOX                 | -                     | -                          | -0.20 (-1.32 to 0.91) | ⊕⊕○○ <sub>h</sub><br>Low      | -0.20 (-1.32 to 0.91) | ⊕○○○ <sub>e,h</sub><br>Very low |
| SD alone            | -0.20 (-1.04 to 0.64) | ⊕⊕○○ <sub>a,e</sub><br>Low | -                     | -                             | -0.20 (-1.04 to 0.64) | ⊕○○○ <sub>e,h</sub><br>Very low |
| <b>MINO HCl vs.</b> |                       |                            |                       |                               |                       |                                 |
| SZ                  | -                     | -                          | 1.47 (0.49 to 2.45)   | ⊕⊕○○ <sub>h</sub><br>Low      | 1.47 (0.49 to 2.45)   | ⊕⊕○○ <sub>h</sub><br>Low        |
| MET                 | -                     | -                          | 0.43 (-0.40 to 1.25)  | ⊕⊕○○ <sub>h</sub><br>Low      | 0.43 (-0.40 to 1.25)  | ⊕○○○ <sub>e,h</sub><br>Very low |
| MOX                 | -                     | -                          | 0.42 (-0.41 to 1.25)  | ⊕⊕○○ <sub>h</sub><br>Low      | 0.42 (-0.41 to 1.25)  | ⊕○○○ <sub>e,h</sub><br>Very low |
| AMOX+MET            | -                     | -                          | 0.36 (-0.31 to 1.03)  | ⊕○○○ <sub>i</sub><br>Very low | 0.36 (-0.31 to 1.03)  | ⊕○○○ <sub>e,i</sub><br>Very low |
| CLM                 | -                     | -                          | 0.38 (-0.48 to 1.24)  | ⊕○○○ <sub>i</sub><br>Very low | 0.38 (-0.48 to 1.24)  | ⊕○○○ <sub>e,i</sub><br>Very low |
| CEF                 | -                     | -                          | 0.11 (-0.84 to 1.07)  | ⊕○○○ <sub>i</sub><br>Very low | 0.11 (-0.84 to 1.07)  | ⊕○○○ <sub>e,i</sub><br>Very low |
| SEC                 | -                     | -                          | 0.02 (-1.03 to 1.06)  | ⊕⊕○○ <sub>h</sub><br>Low      | 0.02 (-1.03 to 1.06)  | ⊕○○○ <sub>e,h</sub><br>Very low |
| AZ                  | -                     | -                          | -0.02 (-0.70 to 0.66) | ⊕○○○ <sub>i</sub><br>Very low | -0.02 (-0.70 to 0.66) | ⊕○○○ <sub>e,i</sub><br>Very low |
| DOX                 | -                     | -                          | -0.19 (-1.15 to 0.77) | ⊕⊕○○ <sub>h</sub><br>Low      | -0.19 (-1.15 to 0.77) | ⊕○○○ <sub>e,h</sub><br>Very low |

| Comparisons    | GRADE                 |                                        |                       |                               |                       |                                  |
|----------------|-----------------------|----------------------------------------|-----------------------|-------------------------------|-----------------------|----------------------------------|
|                | Direct evidence       |                                        | Indirect evidence     |                               | Network meta-analysis |                                  |
|                | MD (95% CI)           | Certainty of evidence                  | MD (95% CI)           | Certainty of evidence         | MD (95% CI)           | Certainty of evidence            |
| SD alone       | -0.18 (-0.81 to 0.44) | ⊕⊕○○ <sub>a, e</sub><br>Low            | -                     | -                             | -0.18 (-0.81 to 0.44) | ⊕○○○ <sub>e, h</sub><br>Very low |
| <b>AZ vs.</b>  |                       |                                        |                       |                               |                       |                                  |
| SZ             | -                     | -                                      | 1.49 (0.69 to 2.28)   | ⊕○○○ <sub>i</sub><br>Very low | 1.49 (0.69 to 2.28)   | ⊕○○○ <sub>i</sub><br>Very low    |
| MET            | -                     | -                                      | 0.44 (-0.15 to 1.03)  | ⊕○○○ <sub>i</sub><br>Very low | 0.44 (-0.15 to 1.03)  | ⊕○○○ <sub>e, i</sub><br>Very low |
| MOX            | -                     | -                                      | 0.43 (-0.17 to 1.04)  | ⊕○○○ <sub>i</sub><br>Very low | 0.43 (-0.17 to 1.04)  | ⊕○○○ <sub>e, i</sub><br>Very low |
| AMOX+MET       | 0.19 (-0.42 to 0.80)  | ⊕○○○ <sub>a, c, d, e</sub><br>Very low | 0.38 (0.05 to 0.71)   | ⊕○○○ <sub>i</sub><br>Very low | 0.38 (0.05 to 0.71)   | ⊕○○○ <sub>i</sub><br>Very low    |
| CLM            | -                     | -                                      | 0.39 (-0.25 to 1.04)  | ⊕○○○ <sub>i</sub><br>Very low | 0.39 (-0.25 to 1.04)  | ⊕○○○ <sub>e, i</sub><br>Very low |
| CEF            | -                     | -                                      | 0.13 (-0.63 to 0.89)  | ⊕○○○ <sub>i</sub><br>Very low | 0.13 (-0.63 to 0.89)  | ⊕○○○ <sub>e, i</sub><br>Very low |
| SEC            | -                     | -                                      | 0.03 (-0.85 to 0.91)  | ⊕○○○ <sub>i</sub><br>Very low | 0.03 (-0.85 to 0.91)  | ⊕○○○ <sub>e, i</sub><br>Very low |
| MINO HCl       | -                     | -                                      | 0.02 (-0.66 to 0.70)  | ⊕○○○ <sub>i</sub><br>Very low | 0.02 (-0.66 to 0.70)  | ⊕○○○ <sub>e, i</sub><br>Very low |
| DOX            | -                     | -                                      | -0.17 (-0.94 to 0.60) | ⊕○○○ <sub>i</sub><br>Very low | -0.17 (-0.94 to 0.60) | ⊕○○○ <sub>e, i</sub><br>Very low |
| SD alone       | -0.14 (-0.41 to 0.13) | ⊕○○○ <sub>a, c, d, e</sub><br>Very low | -0.66 (-1.80 to 0.48) | ⊕○○○ <sub>i</sub><br>Very low | -0.17 (-0.43 to 0.09) | ⊕○○○ <sub>e, i</sub><br>Very low |
| <b>DOX vs.</b> |                       |                                        |                       |                               |                       |                                  |
| SZ             | -                     | -                                      | 1.66 (0.61 to 2.71)   | ⊕⊕○○ <sub>h</sub><br>Low      | 1.66 (0.61 to 2.71)   | ⊕⊕○○ <sub>h</sub><br>Low         |
| MET            | 0.48 (-0.37 to 1.33)  | ⊕⊕○○ <sub>a, e</sub><br>Low            | -1.34 (-3.31 to 0.63) | ⊕⊕○○ <sub>h</sub><br>Low      | 0.61 (-0.16 to 1.39)  | ⊕○○○ <sub>e, h</sub><br>Very low |
| MOX            | -                     | -                                      | 0.61 (-0.30 to 1.51)  | ⊕⊕○○ <sub>h</sub><br>Low      | 0.61 (-0.30 to 1.51)  | ⊕○○○ <sub>e, h</sub><br>Very low |
| AMOX+MET       | 0.43 (-0.43 to 1.29)  | ⊕⊕⊕○ <sub>a</sub><br>Moderate          | 0.86 (-0.51 to 2.24)  | ⊕○○○ <sub>i</sub><br>Very low | 0.55 (-0.18 to 1.28)  | ⊕○○○ <sub>e, i</sub><br>Very low |
| CLM            | -                     | -                                      | 0.57 (-0.37 to 1.50)  | ⊕○○○ <sub>i</sub><br>Very low | 0.57 (-0.37 to 1.50)  | ⊕○○○ <sub>e, i</sub><br>Very low |

| Comparisons  | GRADE                |                                       |                       |                               |                       |                                 |
|--------------|----------------------|---------------------------------------|-----------------------|-------------------------------|-----------------------|---------------------------------|
|              | Direct evidence      |                                       | Indirect evidence     |                               | Network meta-analysis |                                 |
|              | MD (95% CI)          | Certainty of evidence                 | MD (95% CI)           | Certainty of evidence         | MD (95% CI)           | Certainty of evidence           |
| CEF          | -                    | -                                     | 0.30 (-0.71 to 1.31)  | ⊕○○○ <sub>i</sub><br>Very low | 0.30 (-0.71 to 1.31)  | ⊕○○○ <sub>e,i</sub><br>Very low |
| SEC          | -                    | -                                     | 0.20 (-0.91 to 1.32)  | ⊕⊕○○ <sub>h</sub><br>Low      | 0.20 (-0.91 to 1.32)  | ⊕○○○ <sub>e,h</sub><br>Very low |
| MINO HCl     | -                    | -                                     | 0.19 (-0.77 to 1.15)  | ⊕⊕○○ <sub>h</sub><br>Low      | 0.19 (-0.77 to 1.15)  | ⊕○○○ <sub>e,h</sub><br>Very low |
| AZ           | -                    | -                                     | 0.17 (-0.60 to 0.94)  | ⊕○○○ <sub>i</sub><br>Very low | 0.17 (-0.60 to 0.94)  | ⊕○○○ <sub>e,i</sub><br>Very low |
| SD alone     | 0.26 (-0.59 to 1.11) | ⊕⊕○○ <sub>a,e</sub><br>Low            | -0.69 (-2.10 to 0.71) | ⊕⊕○○ <sub>h</sub><br>Low      | 0.00 (-0.73 to 0.73)  | ⊕○○○ <sub>e,h</sub><br>Very low |
| SD alone vs. |                      |                                       |                       |                               |                       |                                 |
| SZ           | 1.66 (0.91 to 2.41)  | ⊕⊕○○ <sub>b</sub><br>Low              | -                     | -                             | 1.66 (0.91 to 2.41)   | ⊕⊕○○ <sub>h</sub><br>Low        |
| MET          | 0.80 (0.19 to 1.40)  | ⊕⊕○○ <sub>a,e</sub><br>Low            | -0.12 (-1.31 to 1.07) | ⊕⊕○○ <sub>h</sub><br>Low      | 0.61 (0.07 to 1.15)   | ⊕⊕○○ <sub>h</sub><br>Low        |
| MOX          | 0.71 (-0.12 to 1.29) | ⊕⊕○○ <sub>a,d</sub><br>Low            | -0.10 (-1.62 to 1.43) | ⊕⊕○○ <sub>h</sub><br>Low      | 0.60 (0.06 to 1.15)   | ⊕⊕○○ <sub>h</sub><br>Low        |
| AMOX+MET     | 0.56 (0.32 to 0.81)  | ⊕○○○ <sub>a,c,d,e,f</sub><br>Very low | 0.27 (-0.79 to 1.33)  | ⊕○○○ <sub>i</sub><br>Very low | 0.55 (0.31 to 0.79)   | ⊕○○○ <sub>i</sub><br>Very low   |
| CLM          | 0.56 (0.02 to 1.15)  | ⊕○○○ <sub>a,c,d,e</sub><br>Very low   | -                     | -                             | 0.56 (-0.02 to 1.15)  | ⊕○○○ <sub>e,i</sub><br>Very low |
| CEF          | 0.04 (-0.78 to 0.86) | ⊕○○○ <sub>b,e</sub><br>Very low       | 1.17 (-0.33 to 2.68)  | ⊕○○○ <sub>i</sub><br>Very low | 0.30 (-0.42 to 1.02)  | ⊕○○○ <sub>e,i</sub><br>Very low |
| SEC          | 0.20 (-0.64 to 1.04) | ⊕⊕○○ <sub>a,e</sub><br>Low            | -                     | -                             | 0.20 (-0.64 to 1.04)  | ⊕○○○ <sub>e,h</sub><br>Very low |
| MINO HCl     | 0.18 (-0.44 to 0.81) | ⊕⊕○○ <sub>a,e</sub><br>Low            | -                     | -                             | 0.18 (-0.44 to 0.18)  | ⊕○○○ <sub>e,h</sub><br>Very low |
| AZ           | 0.14 (-0.13 to 0.41) | ⊕○○○ <sub>a,c,d,e</sub><br>Very low   | -0.66 (-1.80 to 0.48) | ⊕○○○ <sub>i</sub><br>Very low | 0.17 (-0.09 to 0.43)  | ⊕○○○ <sub>e,i</sub><br>Very low |
| DOX          | 0.26 (-1.11 to 0.59) | ⊕⊕○○ <sub>a,e</sub><br>Low            | 0.69 (-0.71 to 2.10)  | ⊕⊕○○ <sub>h</sub><br>Low      | 0.00 (-0.73 to 0.73)  | ⊕○○○ <sub>e,h</sub><br>Very low |

<sup>a</sup> serious risk of bias; <sup>b</sup> very serious risk of bias; <sup>c</sup> serious inconsistency; <sup>d</sup> serious indirectness <sup>e</sup> serious imprecision; <sup>f</sup> publication bias; <sup>g</sup> contributing evidence of moderate quality; <sup>h</sup> contributing evidence of low quality; <sup>i</sup> contributing evidence of very low quality; <sup>j</sup> contributing evidence of high quality; <sup>k</sup> incoherence

**Table S28.** Certainty of evidence for intermediate-term PPD reduction following the use of systemic antibiotics as adjunct to subgingival debridement

| Comparisons    | GRADE                  |                                     |                        |                               |                        |                                  |
|----------------|------------------------|-------------------------------------|------------------------|-------------------------------|------------------------|----------------------------------|
|                | Direct evidence        |                                     | Indirect evidence      |                               | Network meta-analysis  |                                  |
|                | MD (95% CI)            | Certainty of evidence               | MD (95% CI)            | Certainty of evidence         | MD (95% CI)            | Certainty of evidence            |
| <b>SZ vs.</b>  |                        |                                     |                        |                               |                        |                                  |
| MET            | -                      | -                                   | -1.43 (-2.26 to -0.60) | ⊕⊕○○ <sub>h</sub><br>Low      | -1.43 (-2.26 to -0.60) | ⊕⊕○○ <sub>h</sub><br>Low         |
| Clindamycin    | -                      | -                                   | -1.52 (-2.44 to -0.60) | ⊕⊕○○ <sub>h</sub><br>Low      | -1.52 (-2.44 to -0.60) | ⊕⊕○○ <sub>h</sub><br>Low         |
| AMOX+MET       | -                      | -                                   | -1.77 (-2.55 to -1.00) | ⊕○○○ <sub>i</sub><br>Very low | -1.77 (-2.55 to -1.00) | ⊕○○○ <sub>i</sub><br>Very low    |
| MOX            | -                      | -                                   | -1.84 (-2.66 to -1.02) | ⊕⊕○○ <sub>h</sub><br>Low      | -1.84 (-2.66 to -1.02) | ⊕⊕○○ <sub>h</sub><br>Low         |
| DOX            | -                      | -                                   | -2.21 (-3.05 to -1.37) | ⊕○○○ <sub>i</sub><br>Very low | -2.21 (-3.05 to -1.37) | ⊕○○○ <sub>i</sub><br>Very low    |
| MINO HCl       | -                      | -                                   | -2.22 (-3.20 to -1.24) | ⊕⊕○○ <sub>h</sub><br>Low      | -2.22 (-3.20 to -1.24) | ⊕⊕○○ <sub>h</sub><br>Low         |
| AZ             | -                      | -                                   | -2.27 (-3.05 to -1.49) | ⊕○○○ <sub>i</sub><br>Very low | -2.27 (-3.05 to -1.49) | ⊕○○○ <sub>i</sub><br>Very low    |
| CLM            | -                      | -                                   | -2.36 (-3.17 to -1.55) | ⊕○○○ <sub>i</sub><br>Very low | -2.36 (-3.17 to -1.55) | ⊕○○○ <sub>i</sub><br>Very low    |
| SD alone       | -2.42 (-3.18 to -1.66) | ⊕⊕○○ <sub>b</sub><br>Low            | -                      | -                             | -2.42 (-3.18 to -1.66) | ⊕⊕○○ <sub>h</sub><br>Low         |
| <b>MET vs.</b> |                        |                                     |                        |                               |                        |                                  |
| SZ             | -                      | -                                   | 1.43 (0.60 to 2.26)    | ⊕⊕○○ <sub>h</sub><br>Low      | 1.43 (0.60 to 2.26)    | ⊕⊕○○ <sub>h</sub><br>Low         |
| Clindamycin    | 0.00 (-0.55 to 0.55)   | ⊕⊕○○ <sub>a, e</sub><br>Low         | -0.62 (-1.98 to 0.75)  | ⊕⊕○○ <sub>h</sub><br>Low      | -0.09 (-0.60 to 0.43)  | ⊕○○○ <sub>e, h</sub><br>Very low |
| AMOX+MET       | -0.34 (-0.89 to 0.21)  | ⊕⊕○○ <sub>a, e</sub><br>Low         | -0.35 (-0.85 to 0.16)  | ⊕○○○ <sub>i</sub><br>Very low | -0.34 (-0.71 to 0.03)  | ⊕○○○ <sub>e, i</sub><br>Very low |
| MOX            | -                      | -                                   | -0.41 (-0.89 to 0.06)  | ⊕⊕○○ <sub>h</sub><br>Low      | -0.41 (-0.89 to 0.06)  | ⊕○○○ <sub>e, h</sub><br>Very low |
| DOX            | -0.78 (-1.15 to -0.41) | ⊕○○○ <sub>a, c, d</sub><br>Very low | -                      | -                             | -0.78 (-1.15 to -0.41) | ⊕○○○ <sub>i</sub><br>Very low    |
| MINO HCl       | -                      | -                                   | -0.79 (-1.50 to -0.08) | ⊕⊕○○ <sub>h</sub><br>Low      | -0.79 (-1.50 to -0.08) | ⊕⊕○○ <sub>h</sub><br>Low         |
| AZ             | -                      | -                                   | -0.84 (-1.24 to -0.44) | ⊕○○○ <sub>i</sub><br>Very low | -0.84 (-1.24 to -0.44) | ⊕○○○ <sub>i</sub><br>Very low    |

| Comparisons            | GRADE                  |                               |                        |                               |                        |                                  |
|------------------------|------------------------|-------------------------------|------------------------|-------------------------------|------------------------|----------------------------------|
|                        | Direct evidence        |                               | Indirect evidence      |                               | Network meta-analysis  |                                  |
|                        | MD (95% CI)            | Certainty of evidence         | MD (95% CI)            | Certainty of evidence         | MD (95% CI)            | Certainty of evidence            |
| CLM                    | -                      | -                             | -0.93 (-1.39 to -0.47) | ⊕○○○ <sub>i</sub><br>Very low | -0.93 (-1.39 to -0.47) | ⊕○○○ <sub>i</sub><br>Very low    |
| SD alone               | -1.04 (-1.41 to -0.66) | ⊕⊕○○ <sub>a, d</sub><br>Low   | -0.71 (-1.66 to 0.24)  | ⊕⊕○○ <sub>h</sub><br>Low      | -0.99 (-1.34 to -0.64) | ⊕⊕○○ <sub>h</sub><br>Low         |
| <b>Clindamycin vs.</b> |                        |                               |                        |                               |                        |                                  |
| SZ                     | -                      | -                             | 1.52 (0.60 to 2.44)    | ⊕⊕○○ <sub>h</sub><br>Low      | 1.52 (0.60 – 2.44)     | ⊕⊕○○ <sub>h</sub><br>Low         |
| MET                    | 0.00 (-0.55 to 0.55)   | ⊕⊕○○ <sub>a, e</sub><br>Low   | 0.62 (-0.75 to 1.98)   | ⊕⊕○○ <sub>h</sub><br>Low      | 0.09 (-0.43 to 0.60)   | ⊕○○○ <sub>e, h</sub><br>Very low |
| AMOX+MET               | -                      | -                             | -0.26 (-0.79 to 0.28)  | ⊕○○○ <sub>i</sub><br>Very low | -0.26 (-0.79 to 0.28)  | ⊕○○○ <sub>e, i</sub><br>Very low |
| MOX                    | -                      | -                             | -0.32 (-0.93 to 0.29)  | ⊕⊕⊕○ <sub>g</sub><br>Moderate | -0.32 (-0.93 to 0.29)  | ⊕⊕○○ <sub>e, g</sub><br>Low      |
| DOX                    | -0.60 (-1.16 to -0.04) | ⊕⊕⊕○ <sub>a</sub><br>Moderate | -1.21 (-2.55 to 0.13)  | ⊕○○○ <sub>i</sub><br>Very low | -0.69 (-1.21 to -0.17) | ⊕○○○ <sub>i</sub><br>Very low    |
| MINO HCl               | -                      | -                             | -0.70 (-1.51 to 0.10)  | ⊕⊕⊕○ <sub>g</sub><br>Moderate | -0.70 (-1.51 to 0.10)  | ⊕⊕○○ <sub>e, g</sub><br>Low      |
| AZ                     | -                      | -                             | -0.75 (-1.31 to -0.20) | ⊕○○○ <sub>i</sub><br>Very low | -0.75 (-1.31 to -0.20) | ⊕○○○ <sub>i</sub><br>Very low    |
| CLM                    | -                      | -                             | -0.84 (-1.44 to -0.24) | ⊕○○○ <sub>i</sub><br>Very low | -0.84 (-1.44 to -0.24) | ⊕○○○ <sub>i</sub><br>Very low    |
| SD alone               | -0.90 (-1.49 to -0.31) | ⊕⊕⊕○ <sub>a</sub><br>Moderate | -0.91 (-2.04 to 0.21)  | ⊕⊕⊕○ <sub>g</sub><br>Moderate | -0.90 (-1.42 to -0.38) | ⊕⊕⊕○ <sub>g</sub><br>Moderate    |
| <b>AMOX+MET vs.</b>    |                        |                               |                        |                               |                        |                                  |
| SZ                     | -                      | -                             | 1.77 (1.00 to 2.55)    | ⊕○○○ <sub>i</sub><br>Very low | 1.77 (1.00 to 2.55)    | ⊕○○○ <sub>i</sub><br>Very low    |
| MET                    | 0.34 (-0.21 to 0.89)   | ⊕⊕○○ <sub>a, e</sub><br>Low   | -0.35 (-0.85 to 0.16)  | ⊕○○○ <sub>i</sub><br>Very low | 0.34 (-0.03 to 0.71)   | ⊕○○○ <sub>e, i</sub><br>Very low |
| Clindamycin            | -                      | -                             | 0.26 (-0.28 to 0.79)   | ⊕○○○ <sub>i</sub><br>Very low | 0.26 (-0.28 to 0.79)   | ⊕○○○ <sub>e, i</sub><br>Very low |
| MOX                    | -0.07 (-0.57 to 0.43)  | ⊕⊕○○ <sub>a, e</sub><br>Low   | -0.07 (-0.54 to 0.41)  | ⊕○○○ <sub>i</sub><br>Very low | -0.26 (-0.79 to 0.28)  | ⊕○○○ <sub>e, h</sub><br>Very low |
| DOX                    | -0.62 (-1.18 to -0.06) | ⊕⊕⊕○ <sub>a</sub><br>Moderate | -0.32 (-0.93 to 0.29)  | ⊕○○○ <sub>i</sub><br>Very low | -0.32 (-0.93 to 0.29)  | ⊕⊕○○ <sub>e, g</sub><br>Low      |



| Comparisons    | GRADE                  |                                   |                        |                               |                        |                                 |
|----------------|------------------------|-----------------------------------|------------------------|-------------------------------|------------------------|---------------------------------|
|                | Direct evidence        |                                   | Indirect evidence      |                               | Network meta-analysis  |                                 |
|                | MD (95% CI)            | Certainty of evidence             | MD (95% CI)            | Certainty of evidence         | MD (95% CI)            | Certainty of evidence           |
| MINO HCl       | -                      | -                                 | -0.69 (-1.21 to -0.17) | ⊕○○○ <sub>i</sub><br>Very low | -0.69 (-1.21 to -0.17) | ⊕○○○ <sub>i</sub><br>Very low   |
| AZ             | -                      | -                                 | -0.70 (-1.51 to 0.10)  | ⊕○○○ <sub>i</sub><br>Very low | -0.70 (-1.51 to 0.10)  | ⊕○○○ <sub>e,i</sub><br>Very low |
| CLM            | -                      | -                                 | -0.75 (-1.31 to -0.20) | ⊕○○○ <sub>i</sub><br>Very low | -0.75 (-1.31 to -0.20) | ⊕○○○ <sub>i</sub><br>Very low   |
| SD alone       | -0.66 (-0.84 to -0.49) | ⊕○○○ <sub>a,c,d</sub><br>Very low | -0.22 (-1.13 to 0.70)  | ⊕○○○ <sub>i</sub><br>Very low | -0.84 (-1.44 to -0.24) | ⊕○○○ <sub>i</sub><br>Very low   |
| <b>MOX vs.</b> |                        |                                   |                        |                               |                        |                                 |
| SZ             | -                      | -                                 | 1.84 (1.02 to 2.66)    | ⊕⊕○○ <sub>h</sub><br>Low      | 1.84 (1.02 to 2.66)    | ⊕⊕○○ <sub>h</sub><br>Low        |
| MET            | -                      | -                                 | 0.41 (-0.06 to 0.89)   | ⊕⊕○○ <sub>h</sub><br>Low      | 0.41 (-0.06 to 0.89)   | ⊕○○○ <sub>e,h</sub><br>Very low |
| Clindamycin    | -                      | -                                 | 0.32 (-0.29 to 0.93)   | ⊕⊕⊕○ <sub>g</sub><br>Moderate | 0.32 (-0.29 to 0.93)   | ⊕⊕○○ <sub>e,g</sub><br>Low      |
| AMOX+MET       | 0.07 (-0.43 to 0.57)   | ⊕⊕○○ <sub>a,e</sub><br>Low        | 0.07 (-0.41 to 0.54)   | ⊕○○○ <sub>i</sub><br>Very low | 0.07 (-0.28 to 0.79)   | ⊕○○○ <sub>e,h</sub><br>Very low |
| DOX            | -                      | -                                 | -0.37 (-0.85 to 0.11)  | ⊕○○○ <sub>i</sub><br>Very low | -0.37 (-0.85 to 0.11)  | ⊕○○○ <sub>e,i</sub><br>Very low |
| MINO HCl       | -                      | -                                 | -0.38 (-1.08 to 0.32)  | ⊕⊕⊕○ <sub>g</sub><br>Moderate | -0.38 (-1.08 to 0.32)  | ⊕⊕○○ <sub>e,g</sub><br>Low      |
| AZ             | -                      | -                                 | -0.43 (-0.80 to -0.06) | ⊕○○○ <sub>i</sub><br>Very low | -0.43 (-0.80 to -0.06) | ⊕○○○ <sub>i</sub><br>Very low   |
| CLM            | -                      | -                                 | -0.52 (-0.96 to -0.08) | ⊕○○○ <sub>i</sub><br>Very low | -0.52 (-0.96 to -0.08) | ⊕○○○ <sub>i</sub><br>Very low   |
| SD alone       | -0.64 (-0.99 to -0.30) | ⊕⊕⊕○ <sub>c</sub><br>Moderate     | -0.13 (-1.06 to 0.80)  | ⊕⊕⊕○ <sub>g</sub><br>Moderate | -0.58 (-0.90 to -0.25) | ⊕⊕○○ <sub>e,g</sub><br>Low      |
| <b>DOX vs.</b> |                        |                                   |                        |                               |                        |                                 |
| SZ             | -                      | -                                 | 2.21 (1.37 to 3.05)    | ⊕○○○ <sub>i</sub><br>Very low | 2.21 (1.37 to 3.05)    | ⊕○○○ <sub>i</sub><br>Very low   |
| MET            | 0.78 (0.41 to 1.15)    | ⊕○○○ <sub>a,c,d</sub><br>Very low | -                      | -                             | 0.78 (0.41 to 1.15)    | ⊕○○○ <sub>i</sub><br>Very low   |

| Comparisons         | GRADE                 |                                     |                       |                               |                       |                                  |
|---------------------|-----------------------|-------------------------------------|-----------------------|-------------------------------|-----------------------|----------------------------------|
|                     | Direct evidence       |                                     | Indirect evidence     |                               | Network meta-analysis |                                  |
|                     | MD (95% CI)           | Certainty of evidence               | MD (95% CI)           | Certainty of evidence         | MD (95% CI)           | Certainty of evidence            |
| Clindamycin         | 0.60 (0.04 to 1.16)   | ⊕○○○ <sub>a, d, e</sub><br>Very low | 1.21 (-0.13 to 2.55)  | ⊕○○○ <sub>i</sub><br>Very low | 0.69 (0.17 to 1.21)   | ⊕○○○ <sub>i</sub><br>Very low    |
| AMOX+MET            | 0.62 (0.06 to 1.18)   | ⊕○○○ <sub>a, c, d</sub><br>Very low | 0.28 (-0.23 to 0.78)  | ⊕○○○ <sub>i</sub><br>Very low | 0.44 (0.06 to 0.81)   | ⊕○○○ <sub>i</sub><br>Very low    |
| MOX                 | -                     | -                                   | 0.37 (-0.11 to 0.85)  | ⊕○○○ <sub>i</sub><br>Very low | 0.37 (-0.11 to 0.85)  | ⊕○○○ <sub>e, i</sub><br>Very low |
| MINO HCl            | -                     | -                                   | -0.01 (-0.73 to 0.70) | ⊕○○○ <sub>i</sub><br>Very low | -0.01 (-0.73 to 0.70) | ⊕○○○ <sub>e, i</sub><br>Very low |
| AZ                  | -                     | -                                   | -0.06 (-0.47 to 0.34) | ⊕○○○ <sub>i</sub><br>Very low | -0.06 (-0.47 to 0.34) | ⊕○○○ <sub>e, i</sub><br>Very low |
| CLM                 | -                     | -                                   | -0.15 (-0.62 to 0.31) | ⊕○○○ <sub>i</sub><br>Very low | -0.15 (-0.62 to 0.31) | ⊕○○○ <sub>e, i</sub><br>Very low |
| SD alone            | -0.25 (-0.64 to 0.14) | ⊕○○○ <sub>a, d, e</sub><br>Very low | 0.03 (-0.97 to 1.02)  | ⊕○○○ <sub>i</sub><br>Very low | -0.21 (-0.57 to 0.15) | ⊕○○○ <sub>e, i</sub><br>Very low |
| <b>MINO HCl vs.</b> |                       |                                     |                       |                               |                       |                                  |
| SZ                  | -                     | -                                   | 2.22 (1.24 to 3.20)   | ⊕⊕○○ <sub>h</sub><br>Low      | 2.22 (1.24 to 3.20)   | ⊕⊕○○ <sub>h</sub><br>Low         |
| MET                 | -                     | -                                   | 0.79 (0.08 to 1.50)   | ⊕⊕○○ <sub>h</sub><br>Low      | 0.79 (0.08 to 1.50)   | ⊕⊕○○ <sub>h</sub><br>Low         |
| Clindamycin         | -                     | -                                   | 0.70 (-0.10 to 1.51)  | ⊕⊕⊕○ <sub>g</sub><br>Moderate | 0.70 (-0.10 to 1.51)  | ⊕⊕○○ <sub>e, g</sub><br>Low      |
| AMOX+MET            | -                     | -                                   | 0.45 (-0.19 to 1.09)  | ⊕○○○ <sub>i</sub><br>Very low | 0.45 (-0.19 to 1.09)  | ⊕○○○ <sub>e, i</sub><br>Very low |
| MOX                 | -                     | -                                   | 0.38 (-0.32 to 1.08)  | ⊕⊕⊕○ <sub>g</sub><br>Moderate | 0.38 (-0.32 to 1.08)  | ⊕⊕○○ <sub>e, g</sub><br>Low      |
| DOX                 | -                     | -                                   | 0.01 (-0.70 to 0.73)  | ⊕○○○ <sub>i</sub><br>Very low | 0.01 (-0.70 to 0.73)  | ⊕○○○ <sub>e, i</sub><br>Very low |
| AZ                  | -                     | -                                   | -0.05 (-0.69 to 0.59) | ⊕○○○ <sub>i</sub><br>Very low | -0.05 (-0.69 to 0.59) | ⊕○○○ <sub>e, i</sub><br>Very low |
| CLM                 | -                     | -                                   | -0.14 (-0.82 to 0.54) | ⊕○○○ <sub>i</sub><br>Very low | -0.14 (-0.82 to 0.54) | ⊕○○○ <sub>e, i</sub><br>Very low |
| SD alone            | -0.20 (-0.82 to 0.42) | ⊕⊕⊕○ <sub>e</sub><br>Moderate       | -                     | -                             | -0.20 (-0.82 to 0.42) | ⊕⊕○○ <sub>e, g</sub><br>Low      |

| Comparisons    | GRADE                 |                                     |                       |                               |                       |                                 |
|----------------|-----------------------|-------------------------------------|-----------------------|-------------------------------|-----------------------|---------------------------------|
|                | Direct evidence       |                                     | Indirect evidence     |                               | Network meta-analysis |                                 |
|                | MD (95% CI)           | Certainty of evidence               | MD (95% CI)           | Certainty of evidence         | MD (95% CI)           | Certainty of evidence           |
| <b>AZ vs.</b>  |                       |                                     |                       |                               |                       |                                 |
| SZ             | -                     | -                                   | 2.27 (1.49 to 3.05)   | ⊕○○○<br>Very low <sup>i</sup> | 2.27 (1.49 to 3.05)   | ⊕○○○<br>Very low <sup>i</sup>   |
| MET            | -                     | -                                   | 0.84 (0.44 to 1.24)   | ⊕○○○<br>Very low <sup>i</sup> | 0.84 (0.44 to 1.24)   | ⊕○○○<br>Very low <sup>i</sup>   |
| Clindamycin    | -                     | -                                   | 0.75 (0.20 to 1.31)   | ⊕○○○<br>Very low <sup>i</sup> | 0.75 (0.20 to 1.31)   | ⊕○○○<br>Very low <sup>i</sup>   |
| AMOX+MET       | -                     | -                                   | 0.50 (0.25 to 0.75)   | ⊕○○○<br>Very low <sup>i</sup> | 0.50 (0.25 to 0.75)   | ⊕○○○<br>Very low <sup>i</sup>   |
| MOX            | -                     | -                                   | 0.43 (0.06 to 0.80)   | ⊕○○○<br>Very low <sup>i</sup> | 0.43 (0.06 to 0.80)   | ⊕○○○<br>Very low <sup>i</sup>   |
| DOX            | -                     | -                                   | 0.06 (-0.34 to 0.47)  | ⊕○○○<br>Very low <sup>i</sup> | 0.06 (-0.34 to 0.47)  | ⊕○○○<br>Very low <sup>e,i</sup> |
| MINO HCl       | -                     | -                                   | 0.05 (-0.59 to 0.69)  | ⊕○○○<br>Very low <sup>i</sup> | 0.05 (-0.59 to 0.69)  | ⊕○○○<br>Very low <sup>e,i</sup> |
| CLM            | -                     | -                                   | -0.09 (-0.44 to 0.26) | ⊕○○○<br>Very low <sup>i</sup> | -0.09 (-0.44 to 0.26) | ⊕○○○<br>Very low <sup>e,i</sup> |
| SD alone       | -0.15 (-0.33 to 0.03) | ⊕○○○<br>Very low <sup>a,c,d,e</sup> | -                     | -                             | -0.15 (-0.33 to 0.03) | ⊕○○○<br>Very low <sup>e,i</sup> |
| <b>CLM vs.</b> |                       |                                     |                       |                               |                       |                                 |
| SZ             | -                     | -                                   | 2.36 (1.55 to 3.17)   | ⊕○○○<br>Very low <sup>i</sup> | 2.36 (1.55 to 3.17)   | ⊕○○○<br>Very low <sup>i</sup>   |
| MET            | -                     | -                                   | 0.93 (0.47 to 1.39)   | ⊕○○○<br>Very low <sup>i</sup> | 0.93 (0.47 to 1.39)   | ⊕○○○<br>Very low <sup>i</sup>   |
| Clindamycin    | -                     | -                                   | 0.84 (0.24 to 1.44)   | ⊕○○○<br>Very low <sup>i</sup> | 0.84 (0.24 to 1.44)   | ⊕○○○<br>Very low <sup>i</sup>   |
| AMOX+MET       | -                     | -                                   | 0.59 (0.25 to 0.93)   | ⊕○○○<br>Very low <sup>i</sup> | 0.59 (0.25 to 0.93)   | ⊕○○○<br>Very low <sup>i</sup>   |
| MOX            | -                     | -                                   | 0.52 (0.08 to 0.96)   | ⊕○○○<br>Very low <sup>i</sup> | 0.52 (0.08 to 0.96)   | ⊕○○○<br>Very low <sup>i</sup>   |
| DOX            | -                     | -                                   | 0.15 (-0.31 to 0.62)  | ⊕○○○<br>Very low <sup>i</sup> | 0.15 (-0.31 to 0.62)  | ⊕○○○<br>Very low <sup>e,i</sup> |
| MINO HCl       | -                     | -                                   | 0.14 (-0.54 to 0.82)  | ⊕○○○<br>Very low <sup>i</sup> | 0.14 (-0.54 to 0.82)  | ⊕○○○<br>Very low <sup>e,i</sup> |

| Comparisons  | GRADE                 |                                        |                       |                               |                       |                                  |
|--------------|-----------------------|----------------------------------------|-----------------------|-------------------------------|-----------------------|----------------------------------|
|              | Direct evidence       |                                        | Indirect evidence     |                               | Network meta-analysis |                                  |
|              | MD (95% CI)           | Certainty of evidence                  | MD (95% CI)           | Certainty of evidence         | MD (95% CI)           | Certainty of evidence            |
| AZ           | -                     | -                                      | 0.09 (-0.26 to 0.44)  | ⊕○○○ <sup>i</sup><br>Very low | 0.09 (-0.26 to 0.44)  | ⊕○○○ <sup>e, i</sup><br>Very low |
| SD alone     | -0.06 (-0.36 to 0.24) | ⊕○○○ <sup>c, d, e</sup><br>Very low    | -                     | -                             | -0.06 (-0.36 to 0.24) | ⊕○○○ <sup>e, i</sup><br>Very low |
| SD alone vs. |                       |                                        |                       |                               |                       |                                  |
| SZ           | 2.42 (1.66 to 3.18)   | ⊕⊕○○ <sup>b</sup><br>Low               | -                     | -                             | 2.42 (1.66 to 3.18)   | ⊕⊕○○ <sup>h</sup><br>Low         |
| MET          | 1.04 (0.66 to 1.41)   | ⊕⊕○○ <sup>a, d</sup><br>Low            | 0.71 (-0.24 to 1.66)  | ⊕⊕○○ <sup>h</sup><br>Low      | 0.99 (0.64 to 1.34)   | ⊕⊕○○ <sup>h</sup><br>Low         |
| Clindamycin  | 0.90 (0.31 to 1.49)   | ⊕⊕⊕○ <sup>a</sup><br>Moderate          | 1.21 (-0.13 to 2.55)  | ⊕⊕⊕○ <sup>g</sup><br>Moderate | 0.90 (0.38 to 1.42)   | ⊕⊕⊕○ <sup>g</sup><br>Moderate    |
| AMOX+MET     | 0.66 (0.49 to 0.84)   | ⊕○○○ <sup>a, c, d</sup><br>Very low    | 0.22 (-0.70 to 1.13)  | ⊕○○○ <sup>i</sup><br>Very low | 0.65 (0.48 to 0.82)   | ⊕○○○ <sup>i</sup><br>Very low    |
| MOX          | 0.64 (0.30 to 0.99)   | ⊕⊕⊕○ <sup>a</sup><br>Moderate          | 0.13 (-0.80 to 1.06)  | ⊕⊕⊕○ <sup>g</sup><br>Moderate | 0.58 (0.25 to 0.90)   | ⊕⊕⊕○ <sup>g</sup><br>Moderate    |
| DOX          | 0.25 (-0.14 to 0.64)  | ⊕○○○ <sup>a, d, e</sup><br>Very low    | -0.03 (-1.02 to 0.97) | ⊕○○○ <sup>i</sup><br>Very low | 0.21 (-0.15 to 0.57)  | ⊕○○○ <sup>e, i</sup><br>Very low |
| MINO HCl     | 0.20 (-0.42 to 0.82)  | ⊕⊕⊕○ <sup>e</sup><br>Moderate          | -                     | -                             | 0.20 (-0.42 to 0.82)  | ⊕⊕○○ <sup>e, g</sup><br>Low      |
| AZ           | 0.15 (-0.03 to 0.33)  | ⊕○○○ <sup>a, c, d, e</sup><br>Very low | -                     | -                             | 0.15 (-0.03 to 0.33)  | ⊕○○○ <sup>e, i</sup><br>Very low |
| CLM          | 0.06 (-0.24 to 0.36)  | ⊕○○○ <sup>c, d, e</sup><br>Very low    | -                     | -                             | 0.06 (-0.24 to 0.36)  | ⊕○○○ <sup>e, i</sup><br>Very low |

<sup>a</sup> serious risk of bias; <sup>b</sup> very serious risk of bias; <sup>c</sup> serious inconsistency; <sup>d</sup> serious indirectness <sup>e</sup> serious imprecision; <sup>f</sup> publication bias; <sup>g</sup> contributing evidence of moderate quality; <sup>h</sup> contributing evidence of low quality; <sup>i</sup> contributing evidence of very low quality; <sup>j</sup> contributing evidence of high quality; <sup>k</sup> incoherence

**Table S29.** Certainty of evidence for long-term PPD reduction following the use of systemic antibiotics as adjunct to subgingival debridement

| Comparisons | GRADE                   |                             |                   |                       |                       |                                  |
|-------------|-------------------------|-----------------------------|-------------------|-----------------------|-----------------------|----------------------------------|
|             | Direct evidence         |                             | Indirect evidence |                       | Network meta-analysis |                                  |
|             | MD (95% CI)             | Certainty of evidence       | MD (95% CI)       | Certainty of evidence | MD (95% CI)           | Certainty of evidence            |
| MET vs.     |                         |                             |                   |                       |                       |                                  |
| Clindamycin | - -0.30 (-0.62 to 0.02) | ⊕⊕○○ <sup>a, e</sup><br>Low | -                 | -                     | -0.30 (-0.62 to 0.02) | ⊕○○○ <sup>e, i</sup><br>Very low |

| Comparisons            | GRADE                  |                               |                        |                               |                        |                                  |
|------------------------|------------------------|-------------------------------|------------------------|-------------------------------|------------------------|----------------------------------|
|                        | Direct evidence        |                               | Indirect evidence      |                               | Network meta-analysis  |                                  |
|                        | MD (95% CI)            | Certainty of evidence         | MD (95% CI)            | Certainty of evidence         | MD (95% CI)            | Certainty of evidence            |
| DOX                    | -1.30 (-1.60 to -1.00) | ⊕⊕⊕⊙ <sup>a</sup><br>Moderate | -                      | -                             | -1.30 (-1.60 to -1.00) | ⊕⊕⊕⊙ <sup>g</sup><br>Moderate    |
| AMOX+MET               | -                      | -                             | -1.41 (-1.72 to -1.09) | ⊕⊕⊙⊙ <sup>h</sup><br>Low      | -1.41 (-1.72 to -1.09) | ⊕⊕⊙⊙ <sup>h</sup><br>Low         |
| AZ                     | -                      | -                             | -1.84 (-2.22 to -1.46) | ⊕⊙⊙⊙ <sup>i</sup><br>Very low | -1.84 (-2.22 to -1.46) | ⊕⊙⊙⊙ <sup>i</sup><br>Very low    |
| SD alone               | -1.90 (-2.20 to -1.60) | ⊕⊕⊕⊙ <sup>a</sup><br>Moderate | -                      | -                             | -1.90 (-2.20 to -1.60) | ⊕⊕⊕⊙ <sup>g</sup><br>Moderate    |
| <b>Clindamycin vs.</b> |                        |                               |                        |                               |                        |                                  |
| MET                    | 0.30 (-0.02 to 0.62)   | ⊕⊕⊙⊙ <sup>a, e</sup><br>Low   | -                      | -                             | 0.30 (-0.02 to 0.62)   | ⊕⊙⊙⊙ <sup>e, i</sup><br>Very low |
| DOX                    | -1.00 (-1.36 to -0.64) | ⊕⊕⊕⊙ <sup>a</sup><br>Moderate | -                      | -                             | -1.00 (-1.36 to -0.64) | ⊕⊕⊕⊙ <sup>g</sup><br>Moderate    |
| AMOX+MET               | -                      | -                             | -1.11 (-1.48 to -0.74) | ⊕⊕⊙⊙ <sup>h</sup><br>Low      | -1.11 (-1.48 to -0.74) | ⊕⊕⊙⊙ <sup>h</sup><br>Low         |
| AZ                     | -                      | -                             | -1.54 (-1.97 to -1.11) | ⊕⊙⊙⊙ <sup>i</sup><br>Very low | -1.54 (-1.97 to -1.11) | ⊕⊙⊙⊙ <sup>i</sup><br>Very low    |
| SD alone               | -1.60 (-1.96 to -1.24) | ⊕⊕⊕⊙ <sup>a</sup><br>Moderate | -                      | -                             | -1.60 (-1.96 to -1.24) | ⊕⊕⊕⊙ <sup>g</sup><br>Moderate    |
| <b>DOX vs.</b>         |                        |                               |                        |                               |                        |                                  |
| MET                    | 1.30 (1.00 to 1.60)    | ⊕⊕⊕⊙ <sup>a</sup><br>Moderate | -                      | -                             | 1.30 (1.00 to 1.60)    | ⊕⊕⊕⊙ <sup>g</sup><br>Moderate    |
| Clindamycin            | 1.00 (0.64 to 1.36)    | ⊕⊕⊕⊙ <sup>a</sup><br>Moderate | -                      | -                             | 1.00 (0.64 to 1.36)    | ⊕⊕⊕⊙ <sup>g</sup><br>Moderate    |
| AMOX+MET               | -                      | -                             | -0.11 (-0.46 to 0.24)  | ⊕⊕⊙⊙ <sup>h</sup><br>Low      | -0.11 (-0.46 to 0.24)  | ⊕⊙⊙⊙ <sup>e, h</sup><br>Very low |
| AZ                     | -                      | -                             | -0.54 (-0.95 to -0.13) | ⊕⊙⊙⊙ <sup>i</sup><br>Very low | -0.54 (-0.95 to -0.13) | ⊕⊙⊙⊙ <sup>i</sup><br>Very low    |
| SD alone               | -0.60 (-0.94 to -0.26) | ⊕⊕⊕⊙ <sup>a</sup><br>Moderate | -                      | -                             | -0.60 (-0.94 to -0.26) | ⊕⊕⊕⊙ <sup>g</sup><br>Moderate    |
| <b>AMOX+MET vs.</b>    |                        |                               |                        |                               |                        |                                  |
| MET                    | -                      | -                             | 1.41 (1.09 to 1.72)    | ⊕⊕⊙⊙ <sup>h</sup><br>Low      | 1.41 (1.09 to 1.72)    | ⊕⊕⊙⊙ <sup>h</sup><br>Low         |
| Clindamycin            | -                      | -                             | 1.11 (0.74 to 1.48)    | ⊕⊕⊙⊙ <sup>h</sup><br>Low      | 1.11 (0.74 to 1.48)    | ⊕⊕⊙⊙ <sup>h</sup><br>Low         |

| Comparisons  | GRADE                  |                                        |                        |                               |                        |                                  |
|--------------|------------------------|----------------------------------------|------------------------|-------------------------------|------------------------|----------------------------------|
|              | Direct evidence        |                                        | Indirect evidence      |                               | Network meta-analysis  |                                  |
|              | MD (95% CI)            | Certainty of evidence                  | MD (95% CI)            | Certainty of evidence         | MD (95% CI)            | Certainty of evidence            |
| DOX          | -                      | -                                      | 0.11 (-0.24 to 0.46)   | ⊕⊕○○ <sup>h</sup><br>Low      | 0.11 (-0.24 to 0.46)   | ⊕○○○ <sup>e, h</sup><br>Very low |
| AZ           | -                      | -                                      | -0.43 (-0.68 to -0.18) | ⊕○○○ <sup>i</sup><br>Very low | -0.43 (-0.68 to -0.18) | ⊕○○○ <sup>i</sup><br>Very low    |
| SD alone     | -0.49 (-0.58 to -0.40) | ⊕⊕○○ <sup>a, d</sup><br>Low            | -                      | -                             | -0.49 (-0.58 to -0.40) | ⊕⊕○○ <sup>h</sup><br>Low         |
| AZ vs.       |                        |                                        |                        |                               |                        |                                  |
| MET          | -                      | -                                      | 1.84 (1.46 to 2.22)    | ⊕○○○ <sup>i</sup><br>Very low | 1.84 (1.46 to 2.22)    | ⊕○○○ <sup>i</sup><br>Very low    |
| Clindamycin  | -                      | -                                      | 1.54 (1.11 to 1.97)    | ⊕○○○ <sup>i</sup><br>Very low | 1.54 (1.11 to 1.97)    | ⊕○○○ <sup>i</sup><br>Very low    |
| DOX          | -                      | -                                      | 0.54 (0.13 to 0.95)    | ⊕○○○ <sup>i</sup><br>Very low | 0.54 (0.13 to 0.95)    | ⊕○○○ <sup>i</sup><br>Very low    |
| AMOX+MET     | -                      | -                                      | 0.43 (0.18 to 0.68)    | ⊕○○○ <sup>i</sup><br>Very low | 0.43 (0.18 to 0.68)    | ⊕○○○ <sup>i</sup><br>Very low    |
| SD alone     | -0.06 (-0.30 to 0.17)  | ⊕○○○ <sup>a, c, d, e</sup><br>Very low | -                      | -                             | -0.06 (-0.30 to 0.17)  | ⊕○○○ <sup>e, i</sup><br>Very low |
| SD alone vs. |                        |                                        |                        |                               |                        |                                  |
| MET          | 1.90 (1.60 to 2.20)    | ⊕⊕⊕○ <sup>a</sup><br>Moderate          | -                      | -                             | 1.90 (1.60 to 2.20)    | ⊕⊕⊕○ <sup>g</sup><br>Moderate    |
| Clindamycin  | 1.60 (1.24 to 1.96)    | ⊕⊕⊕○ <sup>a</sup><br>Moderate          | -                      | -                             | 1.60 (1.24 to 1.96)    | ⊕⊕⊕○ <sup>g</sup><br>Moderate    |
| DOX          | 0.60 (0.26 to 0.94)    | ⊕⊕⊕○ <sup>a</sup><br>Moderate          | -                      | -                             | 0.60 (0.26 to 0.94)    | ⊕⊕⊕○ <sup>g</sup><br>Moderate    |
| AMOX+MET     | 0.49 (0.40 to 0.58)    | ⊕⊕○○ <sup>a, d</sup><br>Low            | -                      | -                             | 0.49 (0.40 to 0.58)    | ⊕⊕○○ <sup>h</sup><br>Low         |
| AZ           | 0.06 (-0.17 to .30)    | ⊕○○○ <sup>a, c, d, e</sup><br>Very low | -                      | -                             | 0.6 (-0.17 to 0.30)    | ⊕○○○ <sup>e, i</sup><br>Very low |

<sup>a</sup> serious risk of bias; <sup>b</sup> very serious risk of bias; <sup>c</sup> serious inconsistency; <sup>d</sup> serious indirectness <sup>e</sup> serious imprecision; <sup>f</sup> publication bias; <sup>g</sup> contributing evidence of moderate quality; <sup>h</sup> contributing evidence of low quality; <sup>i</sup> contributing evidence of very low quality; <sup>j</sup> contributing evidence of high quality; <sup>k</sup> incoherence

**Table S30.** Certainty of evidence for short-term BOP reduction following the use of systemic antibiotics as adjunct to subgingival debridement

| Comparisons         | GRADE                    |                                     |                           |                               |                           |                                 |
|---------------------|--------------------------|-------------------------------------|---------------------------|-------------------------------|---------------------------|---------------------------------|
|                     | Direct evidence          |                                     | Indirect evidence         |                               | Network meta-analysis     |                                 |
|                     | MD (95% CI)              | Certainty of evidence               | MD (95% CI)               | Certainty of evidence         | MD (95% CI)               | Certainty of evidence           |
| <b>MET vs.</b>      |                          |                                     |                           |                               |                           |                                 |
| AMOX+MET            | -16.20 (-27.05 to -5.35) | ⊕⊕⊕○ <sub>e</sub><br>Moderate       | -5.05 (-25.45 to 15.35)   | ⊕○○○ <sub>i</sub><br>Very low | -13.74 (-23.32 to -4.16)  | ⊕○○○ <sub>i</sub><br>Very low   |
| AZ                  | -                        | -                                   | -18.39 (-28.74 to -8.04)  | ⊕○○○ <sub>i</sub><br>Very low | -18.39 (-28.74 to -8.04)  | ⊕○○○ <sub>i</sub><br>Very low   |
| MOX                 | -                        | -                                   | -19.38 (-30.80 to -7.96)  | ⊕⊕⊕○ <sub>g</sub><br>Moderate | -19.38 (-30.80 to -7.96)  | ⊕⊕⊕○ <sub>g</sub><br>Moderate   |
| CLM                 | -                        | -                                   | -20.06 (-34.15 to -5.98)  | ⊕⊕⊕○ <sub>g</sub><br>Moderate | -20.06 (-34.15 to -5.98)  | ⊕⊕⊕○ <sub>g</sub><br>Moderate   |
| SD alone            | -19.50 (-30.46 to -8.54) | ⊕⊕⊕○ <sub>e</sub><br>Moderate       | -30.42 (-50.22 to -10.53) | ⊕⊕⊕○ <sub>g</sub><br>Moderate | -22.06 (-31.66 to -12.47) | ⊕⊕⊕○ <sub>g</sub><br>Moderate   |
| <b>AMOX+MET vs.</b> |                          |                                     |                           |                               |                           |                                 |
| MET                 | 16.20 (5.35 to 27.05)    | ⊕⊕⊕○ <sub>e</sub><br>Moderate       | 5.05 (-15.35 to 25.45)    | ⊕○○○ <sub>i</sub><br>Very low | 13.74 (4.16 to 23.32)     | ⊕○○○ <sub>i</sub><br>Very low   |
| AZ                  | -5.24 (-14.33 to 3.86)   | ⊕⊕○○ <sub>a,e</sub><br>Low          | -4.37 (-10.57 to 1.83)    | ⊕○○○ <sub>i</sub><br>Very low | -4.65 (-9.77 to 0.48)     | ⊕○○○ <sub>e,i</sub><br>Very low |
| MOX                 | -0.60 (-10.34 to 9.14)   | ⊕⊕⊕○ <sub>e</sub><br>Moderate       | -10.71 (-20.49 to -0.94)  | ⊕○○○ <sub>i</sub><br>Very low | -5.64 (-12.54 to 1.26)    | ⊕○○○ <sub>e,i</sub><br>Very low |
| CLM                 | -                        | -                                   | -6.32 (-17.24 to 4.59)    | ⊕○○○ <sub>i</sub><br>Very low | -6.32 (-17.24 to 4.59)    | ⊕○○○ <sub>e,i</sub><br>Very low |
| SD alone            | -8.17 (-11.86 to -4.48)  | ⊕○○○ <sub>a,d,e</sub><br>Very low   | -10.89 (-25.85 to 4.07)   | ⊕○○○ <sub>i</sub><br>Very low | -8.32 (-11.90 to -4.74)   | ⊕○○○ <sub>i</sub><br>Very low   |
| <b>AZ vs.</b>       |                          |                                     |                           |                               |                           |                                 |
| MET                 | -                        | -                                   | 18.39 (8.04 to 28.74)     | ⊕○○○ <sub>i</sub><br>Very low | 18.39 (8.04 to 28.74)     | ⊕○○○ <sub>i</sub><br>Very low   |
| AMOX+MET            | 5.24 (-3.86 to 14.33)    | ⊕⊕○○ <sub>a,e</sub><br>Low          | 4.37 (-1.83 to 10.57)     | ⊕○○○ <sub>i</sub><br>Very low | 4.65 (-0.48 to 9.77)      | ⊕○○○ <sub>e,i</sub><br>Very low |
| MOX                 | -                        | -                                   | -0.99 (-8.62 to 6.63)     | ⊕○○○ <sub>i</sub><br>Very low | -0.99 (-8.62 to 6.63)     | ⊕○○○ <sub>e,i</sub><br>Very low |
| CLM                 | -                        | -                                   | -1.68 (-12.78 to 9.43)    | ⊕○○○ <sub>i</sub><br>Very low | -1.68 (-12.78 to 9.43)    | ⊕○○○ <sub>e,i</sub><br>Very low |
| SD alone            | -3.36 (-7.61 to 0.89)    | ⊕○○○ <sub>a,c,d,e</sub><br>Very low | -8.57 (-25.33 to 8.20)    | ⊕○○○ <sub>i</sub><br>Very low | -3.68 (-7.80 to 0.44)     | ⊕○○○ <sub>e,i</sub><br>Very low |

| Comparisons         | GRADE                  |                                     |                         |                               |                         |                                 |
|---------------------|------------------------|-------------------------------------|-------------------------|-------------------------------|-------------------------|---------------------------------|
|                     | Direct evidence        |                                     | Indirect evidence       |                               | Network meta-analysis   |                                 |
|                     | MD (95% CI)            | Certainty of evidence               | MD (95% CI)             | Certainty of evidence         | MD (95% CI)             | Certainty of evidence           |
| <b>MOX vs.</b>      |                        |                                     |                         |                               |                         |                                 |
| MET                 | -                      | -                                   | 19.38 (7.96 to 30.80)   | ⊕⊕⊕○ <sub>g</sub><br>Moderate | 19.38 (7.96 to 30.80)   | ⊕⊕⊕○ <sub>g</sub><br>Moderate   |
| AMOX+MET            | 0.60 (-9.14 to 10.34)  | ⊕⊕⊕○ <sub>e</sub><br>Moderate       | 10.71 (0.94 to 20.49)   | ⊕○○○ <sub>i</sub><br>Very low | 5.64 (-1.26 to 12.54)   | ⊕○○○ <sub>e,i</sub><br>Very low |
| AZ                  | -                      | -                                   | 0.99 (-6.63 to 8.62)    | ⊕○○○ <sub>i</sub><br>Very low | 0.99 (-6.63 to 8.62)    | ⊕○○○ <sub>e,i</sub><br>Very low |
| CLM                 | -                      | -                                   | -0.68 (-12.87 to 11.50) | ⊕⊕⊕○ <sub>g</sub><br>Moderate | -0.68 (-12.87 to 11.50) | ⊕○○○ <sub>e,g</sub><br>Very low |
| SD alone            | -0.70 ( -7.63 to 6.22) | ⊕⊕⊕○ <sub>e</sub><br>Moderate       | -17.06 (-35.72 to 1.60) | ⊕⊕⊕○ <sub>g</sub><br>Moderate | -2.68 ( -9.18 to 3.81)  | ⊕○○○ <sub>e,g</sub><br>Very low |
| <b>CLM vs.</b>      |                        |                                     |                         |                               |                         |                                 |
| MET                 | -                      | -                                   | 20.06 (5.98 to 34.15)   | ⊕⊕⊕○ <sub>g</sub><br>Moderate | 20.06 (5.98 to 34.15)   | ⊕⊕⊕○ <sub>g</sub><br>Moderate   |
| AMOX+MET            | -                      | -                                   | 6.32 (-4.59 to 17.24)   | ⊕○○○ <sub>i</sub><br>Very low | 6.32 (-4.59 to 17.24)   | ⊕○○○ <sub>e,i</sub><br>Very low |
| AZ                  | -                      | -                                   | 1.68 (-9.43 to 12.78)   | ⊕○○○ <sub>i</sub><br>Very low | 1.68 (-9.43 to 12.78)   | ⊕○○○ <sub>e,i</sub><br>Very low |
| MOX                 | -                      | -                                   | 2.68 (-11.50 to 12.87)  | ⊕⊕⊕○ <sub>g</sub><br>Moderate | 2.68 (-11.50 to 12.87)  | ⊕⊕○○ <sub>e,g</sub><br>Low      |
| SD alone            | -2.00 (-12.31 to 8.31) | ⊕⊕⊕○ <sub>e</sub><br>Moderate       | -                       | -                             | -2.00 (-12.31 to 8.31)  | ⊕⊕○○ <sub>e,g</sub><br>Low      |
| <b>SD alone vs.</b> |                        |                                     |                         |                               |                         |                                 |
| MET                 | 19.50 (8.54 to 30.46)  | ⊕⊕⊕○ <sub>e</sub><br>Moderate       | 30.42 (10.63 to 50.22)  | ⊕⊕⊕○ <sub>g</sub><br>Moderate | 22.06 (12.47 to 31.66)  | ⊕⊕⊕○ <sub>g</sub><br>Moderate   |
| AMOX+MET            | 8.17 (4.48 to 11.86)   | ⊕○○○ <sub>a,d,e</sub><br>Very low   | 10.89 (-4.07 to 25.85)  | ⊕○○○ <sub>i</sub><br>Very low | 8.32 (4.74 to 11.90)    | ⊕○○○ <sub>i</sub><br>Very low   |
| AZ                  | 3.36 ( -0.89 to 7.61)  | ⊕○○○ <sub>a,c,d,e</sub><br>Very low | 8.57 (-8.20 to 25.33)   | ⊕○○○ <sub>i</sub><br>Very low | 3.68 (-0.44 to 7.80)    | ⊕○○○ <sub>e,i</sub><br>Very low |
| MOX                 | 0.70 ( -6.22 to 7.63)  | ⊕⊕⊕○ <sub>e</sub><br>Moderate       | 17.06 (-1.60 to 35.72)  | ⊕⊕⊕○ <sub>g</sub><br>Moderate | 2.68 (-3.81 to 9.18)    | ⊕⊕○○ <sub>e,g</sub><br>Low      |
| CLM                 | 2.00 (-8.31 to 12.31)  | ⊕⊕⊕○ <sub>e</sub><br>Moderate       | -                       | -                             | 2.00 (-8.31 to 12.31)   | ⊕⊕○○ <sub>e,g</sub><br>Low      |

<sup>a</sup> serious risk of bias; <sup>b</sup> very serious risk of bias; <sup>c</sup> serious inconsistency; <sup>d</sup> serious indirectness <sup>e</sup> serious imprecision; <sup>f</sup> publication bias; <sup>g</sup> contributing evidence of moderate quality; <sup>h</sup> contributing evidence of low quality; <sup>i</sup> contributing evidence of very low quality; <sup>j</sup> contributing evidence of high quality; <sup>k</sup> incoherence



**Table S31.** Certainty of evidence for intermediate-term BOP reduction following the use of systemic antibiotics as adjunct to subgingival debridement

| Comparisons         | GRADE                   |                                        |                          |                               |                         |                                  |
|---------------------|-------------------------|----------------------------------------|--------------------------|-------------------------------|-------------------------|----------------------------------|
|                     | Direct evidence         |                                        | Indirect evidence        |                               | Network meta-analysis   |                                  |
|                     | MD (95% CI)             | Certainty of evidence                  | MD (95% CI)              | Certainty of evidence         | MD (95% CI)             | Certainty of evidence            |
| <b>AMOX+MET vs.</b> |                         |                                        |                          |                               |                         |                                  |
| AZ                  | -                       | -                                      | -4.92 (-11.38 to 1.54)   | ⊕○○○ <sub>i</sub><br>Very low | -4.92 (-11.38 to 1.54)  | ⊕○○○ <sub>e, i</sub><br>Very low |
| CLM                 | -                       | -                                      | -6.19 (-14.60 to 2.22)   | ⊕⊕○○ <sub>h</sub><br>Low      | -6.19 (-14.60 to 2.22)  | ⊕○○○ <sub>e, h</sub><br>Very low |
| MOX                 | -0.40 ( -9.90 to 9.10)  | ⊕⊕⊕○ <sub>e</sub><br>Moderate          | -13.56 (-23.82 to -3.31) | ⊕⊕○○ <sub>h</sub><br>Low      | -6.48 (-13.45 to 0.49)  | ⊕○○○ <sub>e, h</sub><br>Very low |
| SD alone            | -8.48 (-12.86 to -4.10) | ⊕⊕○○ <sub>d, e</sub><br>Low            | 5.09 (-20.20 to 30.38)   | ⊕⊕○○ <sub>h</sub><br>Low      | -8.08 (-12.40 to -3.77) | ⊕⊕○○ <sub>h</sub><br>Low         |
| <b>AZ vs.</b>       |                         |                                        |                          |                               |                         |                                  |
| AMOX+MET            | -                       | -                                      | 4.92 (-1.54 to 11.38)    | ⊕○○○ <sub>i</sub><br>Very low | 4.92 (-1.54 to 11.38)   | ⊕○○○ <sub>e, i</sub><br>Very low |
| CLM                 | -                       | -                                      | -1.27 ( -9.94 to 7.40)   | ⊕○○○ <sub>i</sub><br>Very low | -1.27 ( -9.94 to 7.40)  | ⊕○○○ <sub>e, i</sub><br>Very low |
| MOX                 | -                       | -                                      | -1.56 ( -9.55 to 6.43)   | ⊕○○○ <sub>i</sub><br>Very low | -1.56 ( -9.55 to 6.43)  | ⊕○○○ <sub>e, i</sub><br>Very low |
| SD alone            | -3.16 ( -7.97 to 1.65)  | ⊕○○○ <sub>a, c, d, e</sub><br>Very low | -                        | -                             | -3.16 ( -7.97 to 1.65)  | ⊕○○○ <sub>e, i</sub><br>Very low |
| <b>CLM vs.</b>      |                         |                                        |                          |                               |                         |                                  |
| AMOX+MET            | -                       | -                                      | 6.19 (-2.22 to 14.60)    | ⊕⊕○○ <sub>h</sub><br>Low      | 6.19 (-2.22 to 14.60)   | ⊕○○○ <sub>e, h</sub><br>Very low |
| AZ                  | -                       | -                                      | 1.27 (-7.40 to 9.94)     | ⊕○○○ <sub>i</sub><br>Very low | 1.27 (-7.40 to 9.94)    | ⊕○○○ <sub>e, i</sub><br>Very low |
| MOX                 | -                       | -                                      | -0.29 ( -9.92 to 9.34)   | ⊕⊕○○ <sub>h</sub><br>Low      | -0.29 ( -9.92 to 9.34)  | ⊕○○○ <sub>e, h</sub><br>Very low |
| SD alone            | -1.89 ( -9.11 to 5.32)  | ⊕⊕⊕○ <sub>e</sub><br>Moderate          | -                        | -                             | -1.89 ( -9.11 to 5.32)  | ⊕⊕○○ <sub>e, g</sub><br>Low      |
| <b>MOX vs.</b>      |                         |                                        |                          |                               |                         |                                  |
| AMOX+MET            | 0.40 (-9.10 to 9.90)    | ⊕⊕⊕○ <sub>e</sub><br>Moderate          | 13.56 (3.31 to 23.82)    | ⊕⊕○○ <sub>h</sub><br>Low      | 6.48 (-0.49 to 13.45)   | ⊕○○○ <sub>e, h</sub><br>Very low |
| AZ                  | -                       | -                                      | 1.56 (-6.43 to 9.55)     | ⊕○○○ <sub>i</sub><br>Very low | 1.56 (-6.43 to 9.55)    | ⊕○○○ <sub>e, i</sub><br>Very low |
| CLM                 | -                       | -                                      | 0.29 (-9.34 to 9.92)     | ⊕⊕○○ <sub>h</sub><br>Low      | 0.29 (-9.34 to 9.92)    | ⊕○○○ <sub>e, h</sub><br>Very low |

| Comparisons         | GRADE                 |                                      |                         |                           |                        |                                  |
|---------------------|-----------------------|--------------------------------------|-------------------------|---------------------------|------------------------|----------------------------------|
|                     | Direct evidence       |                                      | Indirect evidence       |                           | Network meta-analysis  |                                  |
|                     | MD (95% CI)           | Certainty of evidence                | MD (95% CI)             | Certainty of evidence     | MD (95% CI)            | Certainty of evidence            |
| SD alone            | 0.53 ( -6.23 to 7.29) | ⊕⊕○○○ <sup>c,e</sup><br>Low          | -18.96 (-35.25 to 0.32) | ⊕⊕○○○ <sup>h</sup><br>Low | -1.60 ( -7.98 to 4.78) | ⊕○○○○ <sup>e,h</sup><br>Very low |
| <b>SD alone vs.</b> |                       |                                      |                         |                           |                        |                                  |
| AMOX+MET            | 8.48 (4.10 to 12.86)  | ⊕⊕○○○ <sup>d,e</sup><br>Low          | -5.09 (-30.38 to 20.20) | ⊕⊕○○○ <sup>h</sup><br>Low | 8.08 (3.77 to 12.40)   | ⊕⊕○○○ <sup>h</sup><br>Low        |
| AZ                  | 3.16 ( -1.65 to 7.97) | ⊕○○○○ <sup>a,c,d,e</sup><br>Very low | -                       | -                         | 3.16 (-1.65 to 7.95)   | ⊕○○○○ <sup>e,i</sup><br>Very low |
| CLM                 | 1.89 (-5.32 to 9.11)  | ⊕⊕⊕○○ <sup>e</sup><br>Moderate       | -                       | -                         | 1.89 (-5.32 to 9.11)   | ⊕⊕○○○ <sup>e,g</sup><br>Low      |
| MOX                 | 0.53 (-7.29 to 6.23)  | ⊕⊕○○○ <sup>c,e</sup><br>Low          | 18.956 (-0.32 to 38.25) | ⊕⊕○○○ <sup>h</sup><br>Low | 1.60 (-4.78 to 7.96)   | ⊕○○○○ <sup>e,h</sup><br>Very low |

<sup>a</sup>serious risk of bias; <sup>b</sup>very serious risk of bias; <sup>c</sup>serious inconsistency; <sup>d</sup>serious indirectness <sup>e</sup>serious imprecision; <sup>f</sup>publication bias; <sup>g</sup>contributing evidence of moderate quality; <sup>h</sup>contributing evidence of low quality; <sup>i</sup>contributing evidence of very low quality; <sup>j</sup>contributing evidence of high quality; <sup>k</sup>incoherence

**Table S32.** Certainty of evidence for long-term BOP reduction following the use of systemic antibiotics as adjunct to subgingival debridement

| Comparisons         | GRADE                     |                                      |                           |                                |                           |                                  |
|---------------------|---------------------------|--------------------------------------|---------------------------|--------------------------------|---------------------------|----------------------------------|
|                     | Direct evidence           |                                      | Indirect evidence         |                                | Network meta-analysis     |                                  |
|                     | MD (95% CI)               | Certainty of evidence                | MD (95% CI)               | Certainty of evidence          | MD (95% CI)               | Certainty of evidence            |
| <b>AMOX+MET vs.</b> |                           |                                      |                           |                                |                           |                                  |
| SD alone            | -14.27 (-16.99 to -11.55) | ⊕⊕⊕⊕<br>High                         | -                         | -                              | -14.27 (-16.99 to -11.55) | ⊕⊕⊕⊕ <sup>j</sup><br>High        |
| AZ                  | -                         | -                                    | -17.78 (-22.67 to -12.89) | ⊕○○○○ <sup>i</sup><br>Very low | -17.78 (-22.67 to -12.89) | ⊕○○○○ <sup>i</sup><br>Very low   |
| <b>SD alone vs.</b> |                           |                                      |                           |                                |                           |                                  |
| AMOX+MET            | 14.27 (11.55 to 16.99)    | ⊕⊕⊕⊕<br>High                         | -                         | -                              | 14.27 (11.55 to 16.99)    | ⊕⊕⊕⊕ <sup>j</sup><br>High        |
| AZ                  | -3.51 ( -7.58 to 0.56)    | ⊕○○○○ <sup>a,c,d,e</sup><br>Very low | -                         | -                              | -3.51 ( -7.58 to 0.56)    | ⊕○○○○ <sup>e,i</sup><br>Very low |
| <b>AZ vs.</b>       |                           |                                      |                           |                                |                           |                                  |
| AMOX+MET            | -                         | -                                    | 17.78 (12.89 to 22.67)    | ⊕○○○○ <sup>i</sup><br>Very low | 17.78 (12.89 to 22.67)    | ⊕○○○○ <sup>i</sup><br>Very low   |
| SD alone            | 3.51 (-0.56 to 7.58)      | ⊕○○○○ <sup>a,c,d,e</sup><br>Very low | -                         | -                              | 3.51 (-0.56 to 7.58)      | ⊕○○○○ <sup>e,i</sup><br>Very low |

<sup>a</sup>serious risk of bias; <sup>b</sup>very serious risk of bias; <sup>c</sup>serious inconsistency; <sup>d</sup>serious indirectness <sup>e</sup>serious imprecision; <sup>f</sup>publication bias; <sup>g</sup>contributing evidence of moderate quality; <sup>h</sup>contributing evidence of low quality; <sup>i</sup>contributing evidence of very low quality; <sup>j</sup>contributing evidence of high quality; <sup>k</sup>incoherence
